# Supplementary material for: Accelerating Drug Discovery by Early Protein Drug Target Prediction Based on a Multi-Fingerprint Similarity Search
Source: MDPI journal article supplement (doi:10.3390/molecules24122233), 2019-06-14
Supplement: s1 [file s1]

## MuSsel Prediction k<sub>i</sub>:

1 rank

Cytochrome P450 19A1 : Homo sapiens

score: 10.442 on ChEMBL1978 based on 12 fingerprints

| Fingerprint type | Ligand        | Tanimoto | Similarity | activity | Valid fg |
|------------------|---------------|----------|------------|----------|----------|
| FeatMFP1         | CHEMBL1627334 |          | 0.947368   | 100.0    | *        |
| MFP1             | CHEMBL1627334 |          | 0.827586   | 100.0    | *        |
| RDKit7           | CHEMBL3753034 |          | 0.712714   | 100.0    |          |
| Pattern          | CHEMBL3752556 |          | 0.945518   | 100.0    | *        |
| AP_bits          | CHEMBL3752556 |          | 0.637540   | 100.0    | *        |
| TT_bits          | CHEMBL241993  |          | 0.769231   | 100.0    | *        |
| FP2              | CHEMBL241993  |          | 0.727273   | 100.0    | *        |
| hybridization    | CHEMBL3753034 |          | 0.881579   | 100.0    | *        |
| substructure     | CHEMBL1627334 |          | 0.928571   | 100.0    | *        |
| graph            | CHEMBL1627334 |          | 0.977273   | 100.0    | *        |
| pubchem          | CHEMBL3752422 |          | 0.940678   | 100.0    | *        |
| cdk_maccs        | CHEMBL1627334 |          | 0.947368   | 100.0    | *        |
| klekota_roth     | CHEMBL1627334 |          | 0.911765   | 100.0    | *        |

\*\*\* ki ACTIVITY \*\*\* value prediction

based on 12 locally validated fgps ---> 97.735

["TT\_bits", "substructure", "Pattern", "AP\_bits", "MFP1", "klekota\_roth", "pubchem", "graph", "FP2", "FeatMFP1", "cdk\_maccs", "hybridization"]

2 rank

Steryl-sulfatase : Homo sapiens

score: 8.235 on ChEMBL3559 based on 10 fingerprints

| Fingerprint type | Ligand        | Tanimoto | Similarity | activity | Valid fg |
|------------------|---------------|----------|------------|----------|----------|
| FeatMFP1         | CHEMBL1835544 |          | 0.850000   | 30.0     | *        |
| MFP1             | CHEMBL1835544 |          | 0.540541   | 30.0     |          |
| RDKit7           | CHEMBL482212  |          | 0.683849   | 250.0    |          |
| Pattern          | CHEMBL482212  |          | 0.945111   | 250.0    | *        |
| AP_bits          | CHEMBL1835544 |          | 0.554252   | 30.0     | *        |
| TT_bits          | CHEMBL1945908 |          | 0.559524   | 23.0     | *        |
| FP2              | CHEMBL1835544 |          | 0.670455   | 30.0     |          |
| hybridization    | CHEMBL482212  |          | 0.873362   | 250.0    | *        |
| substructure     | CHEMBL1835544 |          | 0.866667   | 30.0     | *        |
| graph            | CHEMBL1835544 |          | 0.931818   | 30.0     | *        |
| pubchem          | CHEMBL1835544 |          | 0.908333   | 30.0     | *        |
| cdk_maccs        | CHEMBL1835544 |          | 0.948718   | 30.0     | *        |
| klekota_roth     | CHEMBL1835544 |          | 0.797297   | 30.0     | *        |

\*\*\* ki ACTIVITY \*\*\* value prediction

based on 10 locally validated fgps ---> 97.751

["TT\_bits", "substructure", "Pattern", "klekota\_roth", "pubchem", "graph", "AP\_bits", "FeatMFP1", "cdk\_maccs", "hybridization"]

3 rank

Progesterone receptor : Bos taurus

score: 8.225 on ChEMBL1909044 based on 10 fingerprints

| Fingerprint type | Ligand       | Tanimoto | Similarity | activity | Valid fg |
|------------------|--------------|----------|------------|----------|----------|
| FeatMFP1         | CHEMBL135    |          | 0.789474   | 4247.0   | *        |
| MFP1             | CHEMBL135    |          | 0.758621   | 4247.0   | *        |
| RDKit7           | CHEMBL135    |          | 0.722429   | 4247.0   |          |
| Pattern          | CHEMBL282575 |          | 0.919105   | 1253.0   | *        |
| AP_bits          | CHEMBL135    |          | 0.558491   | 4247.0   | *        |
| TT_bits          | CHEMBL135    |          | 0.742424   | 4247.0   | *        |
| FP2              | CHEMBL135    |          | 0.675325   | 4247.0   |          |
| hybridization    | CHEMBL135    |          | 0.905405   | 4247.0   | *        |
| substructure     | CHEMBL135    |          | 0.857143   | 4247.0   |          |
| graph            | CHEMBL1766   |          | 0.914894   | 11.0     | *        |
| pubchem          | CHEMBL135    |          | 0.915254   | 4247.0   | *        |
| cdk_maccs        | CHEMBL135    |          | 0.842105   | 4247.0   | *        |

```

    klekota_roth      CHEMBL135          0.878788      4247.0      *
    *** ki ACTIVITY *** value prediction
    based on 10 locally validated fgps ---> 2800.454
    ["TT_bits", "Pattern", "MFP1", "klekota_roth", "pubchem", "graph",
    "AP_bits", "FeatMFP1", "cdk_maccs", "hybridization"]

```

4 rank

Glucocorticoid receptor : Homo sapiens

score: 8.225 on ChEMBL2034 based on 10 fingerprints

| Fingerprint type | Ligand       | Tanimoto Similarity | activity  | Valid fg |
|------------------|--------------|---------------------|-----------|----------|
| FeatMFP1         | CHEMBL135    | 0.789474            | 18828.000 | *        |
| MFP1             | CHEMBL135    | 0.758621            | 18828.000 | *        |
| RDKit7           | CHEMBL135    | 0.722429            | 18828.000 |          |
| Pattern          | CHEMBL282575 | 0.919105            | 2306.000  | *        |
| AP_bits          | CHEMBL135    | 0.558491            | 18828.000 | *        |
| TT_bits          | CHEMBL135    | 0.742424            | 18828.000 | *        |
| FP2              | CHEMBL135    | 0.675325            | 18828.000 |          |
| hybridization    | CHEMBL135    | 0.905405            | 18828.000 | *        |
| substructure     | CHEMBL135    | 0.857143            | 18828.000 |          |
| graph            | CHEMBL1766   | 0.914894            | 1.169     | *        |
| pubchem          | CHEMBL135    | 0.915254            | 18828.000 | *        |
| cdk_maccs        | CHEMBL135    | 0.842105            | 18828.000 | *        |
| klekota_roth     | CHEMBL135    | 0.878788            | 18828.000 | *        |

```

    *** ki ACTIVITY *** value prediction
    based on 10 locally validated fgps ---> 13409.674
    ["TT_bits", "Pattern", "MFP1", "klekota_roth", "pubchem", "graph",
    "AP_bits", "FeatMFP1", "cdk_maccs", "hybridization"]

```

5 rank

Androgen Receptor : Rattus norvegicus

score: 8.206 on ChEMBL3072 based on 10 fingerprints

| Fingerprint type | Ligand        | Tanimoto Similarity | activity | Valid fg |
|------------------|---------------|---------------------|----------|----------|
| FeatMFP1         | CHEMBL135     | 0.789474            | 235.000  | *        |
| MFP1             | CHEMBL135     | 0.758621            | 235.000  | *        |
| RDKit7           | CHEMBL135     | 0.722429            | 235.000  |          |
| Pattern          | CHEMBL282575  | 0.919105            | 6.981    | *        |
| AP_bits          | CHEMBL135     | 0.558491            | 235.000  | *        |
| TT_bits          | CHEMBL135     | 0.742424            | 235.000  | *        |
| FP2              | CHEMBL135     | 0.675325            | 235.000  |          |
| hybridization    | CHEMBL135     | 0.905405            | 235.000  | *        |
| substructure     | CHEMBL135     | 0.857143            | 235.000  |          |
| graph            | CHEMBL1200600 | 0.895833            | 857.000  | *        |
| pubchem          | CHEMBL135     | 0.915254            | 235.000  | *        |
| cdk_maccs        | CHEMBL135     | 0.842105            | 235.000  | *        |
| klekota_roth     | CHEMBL135     | 0.878788            | 235.000  | *        |

```

    *** ki ACTIVITY *** value prediction
    based on 10 locally validated fgps ---> 1162.333
    ["TT_bits", "Pattern", "MFP1", "klekota_roth", "pubchem", "graph",
    "AP_bits", "FeatMFP1", "cdk_maccs", "hybridization"]

```

6 rank

Corticosteroid binding globulin : Homo sapiens

score: 8.148 on ChEMBL2421 based on 10 fingerprints

| Fingerprint type | Ligand       | Tanimoto Similarity | activity | Valid fg |
|------------------|--------------|---------------------|----------|----------|
| FeatMFP1         | CHEMBL135    | 0.789474            | 10000.00 | *        |
| MFP1             | CHEMBL135    | 0.758621            | 10000.00 | *        |
| RDKit7           | CHEMBL135    | 0.722429            | 10000.00 |          |
| Pattern          | CHEMBL193482 | 0.861888            | 10000.00 | *        |
| AP_bits          | CHEMBL135    | 0.558491            | 10000.00 | *        |
| TT_bits          | CHEMBL135    | 0.742424            | 10000.00 | *        |

| FP2           | CHEMBL135   | 0.675325 | 10000.00 |   |  |
|---------------|-------------|----------|----------|---|--|
| hybridization | CHEMBL135   | 0.905405 | 10000.00 | * |  |
| substructure  | CHEMBL135   | 0.857143 | 10000.00 |   |  |
| graph         | CHEMBL93948 | 0.895833 | 1584.89  | * |  |
| pubchem       | CHEMBL135   | 0.915254 | 10000.00 | * |  |
| cdk_maccs     | CHEMBL135   | 0.842105 | 10000.00 | * |  |
| klekota_roth  | CHEMBL135   | 0.878788 | 10000.00 | * |  |

\*\*\* ki ACTIVITY \*\*\* value prediction  
 based on 10 locally validated fgps ---> 9158.489  
 ["TT\_bits", "Pattern", "MFP1", "klekota\_roth", "pubchem", "graph",  
 "AP\_bits", "FeatMFP1", "cdk\_maccs", "hybridization"]

7 rank

Estrogen receptor alpha : Homo sapiens

score: 7.336 on ChEMBL206 based on 9 fingerprints

| Fingerprint type | Ligand        | Tanimoto | Similarity | activity | Valid fg |
|------------------|---------------|----------|------------|----------|----------|
| FeatMFP1         | CHEMBL1230314 | 0.789474 | 4.90       | *        |          |
| MFP1             | CHEMBL135     | 0.758621 | 0.16       | *        |          |
| RDKit7           | CHEMBL135     | 0.722429 | 0.16       |          |          |
| Pattern          | CHEMBL282575  | 0.919105 | 18.00      | *        |          |
| AP_bits          | CHEMBL135     | 0.558491 | 0.16       | *        |          |
| TT_bits          | CHEMBL135     | 0.742424 | 0.16       | *        |          |
| FP2              | CHEMBL135     | 0.675325 | 0.16       |          |          |
| hybridization    | CHEMBL135     | 0.905405 | 0.16       | *        |          |
| substructure     | CHEMBL135     | 0.857143 | 0.16       |          |          |
| graph            | CHEMBL135     | 0.813953 | 0.16       |          |          |
| pubchem          | CHEMBL135     | 0.915254 | 0.16       | *        |          |
| cdk_maccs        | CHEMBL135236  | 0.868421 | 8.00       | *        |          |
| klekota_roth     | CHEMBL135     | 0.878788 | 0.16       | *        |          |

\*\*\* ki ACTIVITY \*\*\* value prediction  
 based on 9 locally validated fgps ---> 6.522  
 ["TT\_bits", "Pattern", "MFP1", "klekota\_roth", "pubchem", "AP\_bits",  
 "FeatMFP1", "cdk\_maccs", "hybridization"]

8 rank

Serotonin transporter : Homo sapiens

score: 7.310 on ChEMBL228 based on 9 fingerprints

| Fingerprint type | Ligand       | Tanimoto | Similarity | activity | Valid fg |
|------------------|--------------|----------|------------|----------|----------|
| FeatMFP1         | CHEMBL135    | 0.789474 | 5714.0     | *        |          |
| MFP1             | CHEMBL135    | 0.758621 | 5714.0     | *        |          |
| RDKit7           | CHEMBL135    | 0.722429 | 5714.0     |          |          |
| Pattern          | CHEMBL282575 | 0.919105 | 1951.0     | *        |          |
| AP_bits          | CHEMBL135    | 0.558491 | 5714.0     | *        |          |
| TT_bits          | CHEMBL135    | 0.742424 | 5714.0     | *        |          |
| FP2              | CHEMBL135    | 0.675325 | 5714.0     |          |          |
| hybridization    | CHEMBL135    | 0.905405 | 5714.0     | *        |          |
| substructure     | CHEMBL135    | 0.857143 | 5714.0     |          |          |
| graph            | CHEMBL135    | 0.813953 | 5714.0     |          |          |
| pubchem          | CHEMBL135    | 0.915254 | 5714.0     | *        |          |
| cdk_maccs        | CHEMBL135    | 0.842105 | 5714.0     | *        |          |
| klekota_roth     | CHEMBL135    | 0.878788 | 5714.0     | *        |          |

\*\*\* ki ACTIVITY \*\*\* value prediction  
 based on 9 locally validated fgps ---> 4730.993  
 ["TT\_bits", "Pattern", "MFP1", "klekota\_roth", "pubchem", "AP\_bits",  
 "FeatMFP1", "cdk\_maccs", "hybridization"]

9 rank

Estrogen receptor beta : Homo sapiens

score: 7.308 on ChEMBL242 based on 9 fingerprints

| Fingerprint type | Ligand | Tanimoto | Similarity | activity | Valid fg |
|------------------|--------|----------|------------|----------|----------|
|------------------|--------|----------|------------|----------|----------|

|               |               |          |        |   |
|---------------|---------------|----------|--------|---|
| FeatMFP1      | CHEMBL1230314 | 0.789474 | 19.000 | * |
| MFP1          | CHEMBL135     | 0.758621 | 0.015  | * |
| RDKit7        | CHEMBL135     | 0.722429 | 0.015  |   |
| Pattern       | CHEMBL1627464 | 0.891192 | 0.025  | * |
| AP_bits       | CHEMBL135     | 0.558491 | 0.015  | * |
| TT_bits       | CHEMBL135     | 0.742424 | 0.015  | * |
| FP2           | CHEMBL135     | 0.675325 | 0.015  |   |
| hybridization | CHEMBL135     | 0.905405 | 0.015  | * |
| substructure  | CHEMBL135     | 0.857143 | 0.015  |   |
| graph         | CHEMBL135     | 0.813953 | 0.015  |   |
| pubchem       | CHEMBL135     | 0.915254 | 0.015  | * |
| cdk_maccs     | CHEMBL135236  | 0.868421 | 24.000 | * |
| klekota_roth  | CHEMBL135     | 0.878788 | 0.015  | * |

\*\*\* ki ACTIVITY \*\*\* value prediction

based on 9 locally validated fgps ---> 7.811

["TT\_bits", "Pattern", "MFP1", "klekota\_roth", "pubchem", "AP\_bits", "FeatMFP1", "cdk\_maccs", "hybridization"]

10 rank

Dopamine transporter : Homo sapiens

score: 7.282 on CHEMBL238 based on 9 fingerprints

| Fingerprint type | Ligand    | Tanimoto | Similarity | activity | Valid | fg |
|------------------|-----------|----------|------------|----------|-------|----|
| FeatMFP1         | CHEMBL135 | 0.789474 | 11847.0    |          | *     |    |
| MFP1             | CHEMBL135 | 0.758621 | 11847.0    |          | *     |    |
| RDKit7           | CHEMBL135 | 0.722429 | 11847.0    |          |       |    |
| Pattern          | CHEMBL691 | 0.891192 | 444.0      |          | *     |    |
| AP_bits          | CHEMBL135 | 0.558491 | 11847.0    |          | *     |    |
| TT_bits          | CHEMBL135 | 0.742424 | 11847.0    |          | *     |    |
| FP2              | CHEMBL135 | 0.675325 | 11847.0    |          |       |    |
| hybridization    | CHEMBL135 | 0.905405 | 11847.0    |          | *     |    |
| substructure     | CHEMBL135 | 0.857143 | 11847.0    |          |       |    |
| graph            | CHEMBL135 | 0.813953 | 11847.0    |          |       |    |
| pubchem          | CHEMBL135 | 0.915254 | 11847.0    |          | *     |    |
| cdk_maccs        | CHEMBL135 | 0.842105 | 11847.0    |          | *     |    |
| klekota_roth     | CHEMBL135 | 0.878788 | 11847.0    |          | *     |    |

\*\*\* ki ACTIVITY \*\*\* value prediction

based on 9 locally validated fgps ---> 9384.404

["TT\_bits", "Pattern", "MFP1", "klekota\_roth", "pubchem", "AP\_bits", "FeatMFP1", "cdk\_maccs", "hybridization"]

11 rank

Aldehyde oxidase : Homo sapiens

score: 7.282 on CHEMBL3257 based on 9 fingerprints

| Fingerprint type | Ligand    | Tanimoto | Similarity | activity | Valid | fg |
|------------------|-----------|----------|------------|----------|-------|----|
| FeatMFP1         | CHEMBL135 | 0.789474 | 870.0      |          | *     |    |
| MFP1             | CHEMBL135 | 0.758621 | 870.0      |          | *     |    |
| RDKit7           | CHEMBL135 | 0.722429 | 870.0      |          |       |    |
| Pattern          | CHEMBL691 | 0.891192 | 430.0      |          | *     |    |
| AP_bits          | CHEMBL135 | 0.558491 | 870.0      |          | *     |    |
| TT_bits          | CHEMBL135 | 0.742424 | 870.0      |          | *     |    |
| FP2              | CHEMBL135 | 0.675325 | 870.0      |          |       |    |
| hybridization    | CHEMBL135 | 0.905405 | 870.0      |          | *     |    |
| substructure     | CHEMBL135 | 0.857143 | 870.0      |          |       |    |
| graph            | CHEMBL135 | 0.813953 | 870.0      |          |       |    |
| pubchem          | CHEMBL135 | 0.915254 | 870.0      |          | *     |    |
| cdk_maccs        | CHEMBL135 | 0.842105 | 870.0      |          | *     |    |
| klekota_roth     | CHEMBL135 | 0.878788 | 870.0      |          | *     |    |

\*\*\* ki ACTIVITY \*\*\* value prediction

based on 9 locally validated fgps ---> 774.977

["TT\_bits", "Pattern", "MFP1", "klekota\_roth", "pubchem", "AP\_bits",  
"FeatMFP1", "cdk\_maccs", "hybridization"]

12 rank

Solute carrier organic anion transporter family member 1A1 : Rattus  
norvegicus

score: 7.274 on ChEMBL1781859 based on 9 fingerprints

| Fingerprint type | Ligand        | Tanimoto | Similarity | activity | Valid | fg |
|------------------|---------------|----------|------------|----------|-------|----|
| FeatMFP1         | ChEMBL135     |          | 0.789474   | 4700.0   | *     |    |
| MFP1             | ChEMBL135     |          | 0.758621   | 4700.0   | *     |    |
| RDKit7           | ChEMBL135     |          | 0.722429   | 4700.0   |       |    |
| Pattern          | ChEMBL1628111 |          | 0.882960   | 1100.0   | *     |    |
| AP_bits          | ChEMBL135     |          | 0.558491   | 4700.0   | *     |    |
| TT_bits          | ChEMBL135     |          | 0.742424   | 4700.0   | *     |    |
| FP2              | ChEMBL135     |          | 0.675325   | 4700.0   |       |    |
| hybridization    | ChEMBL135     |          | 0.905405   | 4700.0   | *     |    |
| substructure     | ChEMBL135     |          | 0.857143   | 4700.0   |       |    |
| graph            | ChEMBL135     |          | 0.813953   | 4700.0   |       |    |
| pubchem          | ChEMBL135     |          | 0.915254   | 4700.0   | *     |    |
| cdk_maccs        | ChEMBL135     |          | 0.842105   | 4700.0   | *     |    |
| klekota_roth     | ChEMBL135     |          | 0.878788   | 4700.0   | *     |    |

\*\*\* ki ACTIVITY \*\*\* value prediction

based on 9 locally validated fgps ---> 5510.140

["TT\_bits", "Pattern", "MFP1", "klekota\_roth", "pubchem", "AP\_bits",  
"FeatMFP1", "cdk\_maccs", "hybridization"]

13 rank

Estrogen sulfotransferase : Sus scrofa

score: 5.857 on ChEMBL3811 based on 7 fingerprints

| Fingerprint type | Ligand        | Tanimoto | Similarity | activity | Valid | fg |
|------------------|---------------|----------|------------|----------|-------|----|
| FeatMFP1         | ChEMBL1627683 |          | 0.842105   | 13600.0  | *     |    |
| MFP1             | ChEMBL1627683 |          | 0.857143   | 13600.0  | *     |    |
| RDKit7           | ChEMBL194749  |          | 0.634449   | 16300.0  |       |    |
| Pattern          | ChEMBL1627977 |          | 0.826087   | 10200.0  |       |    |
| AP_bits          | ChEMBL1627683 |          | 0.521898   | 13600.0  |       |    |
| TT_bits          | ChEMBL1627683 |          | 0.742424   | 13600.0  | *     |    |
| FP2              | ChEMBL1627683 |          | 0.597561   | 13600.0  |       |    |
| hybridization    | ChEMBL1627683 |          | 0.760331   | 13600.0  | *     |    |
| substructure     | ChEMBL1627683 |          | 0.857143   | 13600.0  |       |    |
| graph            | ChEMBL1627977 |          | 0.977273   | 10200.0  | *     |    |
| pubchem          | ChEMBL1627977 |          | 0.771186   | 10200.0  |       |    |
| cdk_maccs        | ChEMBL1627683 |          | 0.868421   | 13600.0  | *     |    |
| klekota_roth     | ChEMBL1627683 |          | 0.808824   | 13600.0  | *     |    |

\*\*\* ki ACTIVITY \*\*\* value prediction

based on 7 locally validated fgps ---> 12559.345

["TT\_bits", "graph", "MFP1", "klekota\_roth", "FeatMFP1", "hybridization",  
"cdk\_maccs"]

14 rank

Carbonic anhydrase II : Homo sapiens

score: 3.784 on ChEMBL205 based on 5 fingerprints

| Fingerprint type | Ligand        | Tanimoto | Similarity | activity | Valid | fg |
|------------------|---------------|----------|------------|----------|-------|----|
| FeatMFP1         | ChEMBL2391082 |          | 0.625000   | 21800.0  |       |    |
| MFP1             | ChEMBL220493  |          | 0.567568   | 13.0     |       |    |
| RDKit7           | ChEMBL220493  |          | 0.670366   | 13.0     |       |    |
| Pattern          | ChEMBL425287  |          | 0.876206   | 232.0    | *     |    |
| AP_bits          | ChEMBL220493  |          | 0.444444   | 13.0     |       |    |
| TT_bits          | ChEMBL220493  |          | 0.608108   | 13.0     | *     |    |
| FP2              | ChEMBL220493  |          | 0.536082   | 13.0     |       |    |
| hybridization    | ChEMBL220493  |          | 0.743590   | 13.0     | *     |    |

|              |               |          |        |   |
|--------------|---------------|----------|--------|---|
| substructure | CHEMBL220493  | 0.733333 | 13.0   |   |
| graph        | CHEMBL898     | 0.674419 | 9370.0 |   |
| pubchem      | CHEMBL220493  | 0.856000 | 13.0   | * |
| cdk_maccs    | CHEMBL1946088 | 0.600000 | 380.0  |   |
| klekota_roth | CHEMBL220493  | 0.700000 | 13.0   | * |

\*\*\* ki ACTIVITY \*\*\* value prediction  
 based on 5 locally validated fgps ---> 34.259  
 ["Pattern", "klekota\_roth", "TT\_bits", "pubchem", "hybridization"]

15 rank

Carbonic anhydrase I : Homo sapiens

score: 3.773 on ChEMBL261 based on 5 fingerprints

| Fingerprint type | Ligand        | Tanimoto | Similarity | activity | Valid fg |
|------------------|---------------|----------|------------|----------|----------|
| FeatMFP1         | CHEMBL2391082 |          | 0.625000   | 760.0    |          |
| MFP1             | CHEMBL220493  |          | 0.567568   | 15.0     |          |
| RDKit7           | CHEMBL220493  |          | 0.670366   | 15.0     |          |
| Pattern          | CHEMBL220493  |          | 0.865093   | 15.0     | *        |
| AP_bits          | CHEMBL220493  |          | 0.444444   | 15.0     |          |
| TT_bits          | CHEMBL220493  |          | 0.608108   | 15.0     | *        |
| FP2              | CHEMBL220493  |          | 0.536082   | 15.0     |          |
| hybridization    | CHEMBL220493  |          | 0.743590   | 15.0     | *        |
| substructure     | CHEMBL220493  |          | 0.733333   | 15.0     |          |
| graph            | CHEMBL898     |          | 0.674419   | 8450.0   |          |
| pubchem          | CHEMBL220493  |          | 0.856000   | 15.0     | *        |
| cdk_maccs        | CHEMBL1946088 |          | 0.600000   | 1040.0   |          |
| klekota_roth     | CHEMBL220493  |          | 0.700000   | 15.0     | *        |

\*\*\* ki ACTIVITY \*\*\* value prediction  
 based on 5 locally validated fgps ---> 1197.155  
 ["Pattern", "klekota\_roth", "TT\_bits", "pubchem", "hybridization"]

16 rank

Carbonic anhydrase IX : Homo sapiens

score: 3.773 on ChEMBL3594 based on 5 fingerprints

| Fingerprint type | Ligand        | Tanimoto | Similarity | activity | Valid fg |
|------------------|---------------|----------|------------|----------|----------|
| FeatMFP1         | CHEMBL2391082 |          | 0.625000   | 15700.0  |          |
| MFP1             | CHEMBL220493  |          | 0.567568   | 32.0     |          |
| RDKit7           | CHEMBL220493  |          | 0.670366   | 32.0     |          |
| Pattern          | CHEMBL220493  |          | 0.865093   | 32.0     | *        |
| AP_bits          | CHEMBL220493  |          | 0.444444   | 32.0     |          |
| TT_bits          | CHEMBL220493  |          | 0.608108   | 32.0     | *        |
| FP2              | CHEMBL220493  |          | 0.536082   | 32.0     |          |
| hybridization    | CHEMBL220493  |          | 0.743590   | 32.0     | *        |
| substructure     | CHEMBL220493  |          | 0.733333   | 32.0     |          |
| graph            | CHEMBL1628004 |          | 0.561644   | 1725.0   |          |
| pubchem          | CHEMBL220493  |          | 0.856000   | 32.0     | *        |
| cdk_maccs        | CHEMBL2391082 |          | 0.551020   | 15700.0  |          |
| klekota_roth     | CHEMBL220493  |          | 0.700000   | 32.0     | *        |

\*\*\* ki ACTIVITY \*\*\* value prediction  
 based on 5 locally validated fgps ---> 37.136  
 ["Pattern", "klekota\_roth", "TT\_bits", "pubchem", "hybridization"]

17 rank

Norepinephrine transporter : Homo sapiens

score: 3.693 on ChEMBL222 based on 5 fingerprints

| Fingerprint type | Ligand       | Tanimoto | Similarity | activity | Valid fg |
|------------------|--------------|----------|------------|----------|----------|
| FeatMFP1         | CHEMBL691    |          | 0.636364   | 951.0    |          |
| MFP1             | CHEMBL282575 |          | 0.583333   | 17087.0  |          |
| RDKit7           | CHEMBL691    |          | 0.688940   | 951.0    |          |
| Pattern          | CHEMBL282575 |          | 0.919105   | 17087.0  | *        |
| AP_bits          | CHEMBL282575 |          | 0.538905   | 17087.0  | *        |

|               |               |          |         |   |
|---------------|---------------|----------|---------|---|
| TT_bits       | CHEMBL282575  | 0.641026 | 17087.0 | * |
| FP2           | CHEMBL691     | 0.619048 | 951.0   |   |
| hybridization | CHEMBL691     | 0.816327 | 951.0   | * |
| substructure  | CHEMBL1601669 | 0.687500 | 1000.0  |   |
| graph         | CHEMBL1200623 | 0.790698 | 2080.0  |   |
| pubchem       | CHEMBL691     | 0.830645 | 951.0   |   |
| cdk_maccs     | CHEMBL691     | 0.820513 | 951.0   |   |
| klekota_roth  | CHEMBL691     | 0.777778 | 951.0   | * |

\*\*\* ki ACTIVITY \*\*\* value prediction  
based on 5 locally validated fgps ---> 10631.626  
["Pattern", "hybridization", "TT\_bits", "klekota\_roth", "AP\_bits"]

18 rank

Adenosine A3 receptor : Homo sapiens

score: 3.693 on ChEMBL256 based on 5 fingerprints

| Fingerprint type | Ligand       | Tanimoto | Similarity | activity | Valid fg |
|------------------|--------------|----------|------------|----------|----------|
| FeatMFP1         | CHEMBL691    |          | 0.636364   | 18610.0  |          |
| MFP1             | CHEMBL282575 |          | 0.583333   | 12312.0  |          |
| RDKit7           | CHEMBL691    |          | 0.688940   | 18610.0  |          |
| Pattern          | CHEMBL282575 |          | 0.919105   | 12312.0  | *        |
| AP_bits          | CHEMBL282575 |          | 0.538905   | 12312.0  | *        |
| TT_bits          | CHEMBL282575 |          | 0.641026   | 12312.0  | *        |
| FP2              | CHEMBL691    |          | 0.619048   | 18610.0  |          |
| hybridization    | CHEMBL691    |          | 0.816327   | 18610.0  | *        |
| substructure     | CHEMBL691    |          | 0.687500   | 18610.0  |          |
| graph            | CHEMBL691    |          | 0.767442   | 18610.0  |          |
| pubchem          | CHEMBL691    |          | 0.830645   | 18610.0  |          |
| cdk_maccs        | CHEMBL691    |          | 0.820513   | 18610.0  |          |
| klekota_roth     | CHEMBL691    |          | 0.777778   | 18610.0  | *        |

\*\*\* ki ACTIVITY \*\*\* value prediction  
based on 5 locally validated fgps ---> 14831.580  
["Pattern", "hybridization", "TT\_bits", "klekota\_roth", "AP\_bits"]

19 rank

Serotonin 2b (5-HT2b) receptor : Homo sapiens

score: 3.627 on ChEMBL1833 based on 5 fingerprints

| Fingerprint type | Ligand       | Tanimoto | Similarity | activity | Valid fg |
|------------------|--------------|----------|------------|----------|----------|
| FeatMFP1         | CHEMBL1405   |          | 0.590909   | 8676.0   |          |
| MFP1             | CHEMBL282575 |          | 0.583333   | 7359.0   |          |
| RDKit7           | CHEMBL282575 |          | 0.634737   | 7359.0   |          |
| Pattern          | CHEMBL282575 |          | 0.919105   | 7359.0   | *        |
| AP_bits          | CHEMBL282575 |          | 0.538905   | 7359.0   | *        |
| TT_bits          | CHEMBL282575 |          | 0.641026   | 7359.0   | *        |
| FP2              | CHEMBL1405   |          | 0.566265   | 8676.0   |          |
| hybridization    | CHEMBL1405   |          | 0.775000   | 8676.0   | *        |
| substructure     | CHEMBL1405   |          | 0.666667   | 8676.0   |          |
| graph            | CHEMBL1405   |          | 0.767442   | 8676.0   |          |
| pubchem          | CHEMBL1405   |          | 0.801587   | 8676.0   |          |
| cdk_maccs        | CHEMBL282575 |          | 0.761905   | 7359.0   |          |
| klekota_roth     | CHEMBL282575 |          | 0.753247   | 7359.0   | *        |

\*\*\* ki ACTIVITY \*\*\* value prediction  
based on 5 locally validated fgps ---> 7622.400  
["Pattern", "hybridization", "TT\_bits", "klekota\_roth", "AP\_bits"]

20 rank

Multidrug resistance-associated protein 1 : Homo sapiens

score: 3.202 on ChEMBL3004 based on 4 fingerprints

| Fingerprint type | Ligand        | Tanimoto | Similarity | activity | Valid fg |
|------------------|---------------|----------|------------|----------|----------|
| FeatMFP1         | CHEMBL1697724 |          | 0.535714   | 22000.0  |          |
| MFP1             | CHEMBL1628111 |          | 0.583333   | 380.0    |          |

|               |               |          |        |   |
|---------------|---------------|----------|--------|---|
| RDKit7        | CHEMBL1628111 | 0.651366 | 380.0  |   |
| Pattern       | CHEMBL1628111 | 0.882960 | 380.0  | * |
| AP_bits       | CHEMBL1628111 | 0.470238 | 380.0  |   |
| TT_bits       | CHEMBL1628111 | 0.666667 | 380.0  | * |
| FP2           | CHEMBL1628111 | 0.525253 | 380.0  |   |
| hybridization | CHEMBL1628111 | 0.689420 | 380.0  |   |
| substructure  | CHEMBL1628111 | 0.631579 | 380.0  |   |
| graph         | CHEMBL1628111 | 0.564516 | 380.0  |   |
| pubchem       | CHEMBL1628111 | 0.868852 | 380.0  | * |
| cdk_maccs     | CHEMBL2075011 | 0.607843 | 1400.0 |   |
| klekota_roth  | CHEMBL1628111 | 0.783784 | 380.0  | * |

\*\*\* ki ACTIVITY \*\*\* value prediction

based on 4 locally validated fgps ---> 388.636

["Pattern", "klekota\_roth", "TT\_bits", "pubchem"]

21 rank

Alpha-2c adrenergic receptor : Homo sapiens

score: 2.852 on ChEMBL1916 based on 4 fingerprints

| Fingerprint type | Ligand       | Tanimoto Similarity | activity | Valid fg |
|------------------|--------------|---------------------|----------|----------|
| FeatMFP1         | CHEMBL282575 | 0.541667            | 3582.0   |          |
| MFP1             | CHEMBL282575 | 0.583333            | 3582.0   |          |
| RDKit7           | CHEMBL282575 | 0.634737            | 3582.0   |          |
| Pattern          | CHEMBL282575 | 0.919105            | 3582.0   | *        |
| AP_bits          | CHEMBL282575 | 0.538905            | 3582.0   | *        |
| TT_bits          | CHEMBL282575 | 0.641026            | 3582.0   | *        |
| FP2              | CHEMBL282575 | 0.518868            | 3582.0   |          |
| hybridization    | CHEMBL282575 | 0.681063            | 3582.0   |          |
| substructure     | CHEMBL282575 | 0.666667            | 3582.0   |          |
| graph            | CHEMBL282575 | 0.507246            | 3582.0   |          |
| pubchem          | CHEMBL282575 | 0.746575            | 3582.0   |          |
| cdk_maccs        | CHEMBL282575 | 0.761905            | 3582.0   |          |
| klekota_roth     | CHEMBL282575 | 0.753247            | 3582.0   | *        |

\*\*\* ki ACTIVITY \*\*\* value prediction

based on 4 locally validated fgps ---> 3582.000

["Pattern", "klekota\_roth", "TT\_bits", "AP\_bits"]



## MuSsel Prediction IC<sub>50</sub>:

1 rank

Steryl-sulfatase : Homo sapiens

score: 10.910 on ChEMBL3559 based on 13 fingerprints

| Fingerprint type | Ligand        | Tanimoto | Similarity | activity | Valid fg |
|------------------|---------------|----------|------------|----------|----------|
| FeatMFP1         | ChEMBL1627410 |          | 0.850000   | 840.0    | *        |
| MFP1             | ChEMBL135     |          | 0.758621   | 84000.0  | *        |
| RDKit7           | ChEMBL1947227 |          | 0.751716   | 35.0     | *        |
| Pattern          | ChEMBL482212  |          | 0.945111   | 220.0    | *        |
| AP_bits          | ChEMBL1947227 |          | 0.571053   | 35.0     | *        |
| TT_bits          | ChEMBL135     |          | 0.742424   | 84000.0  | *        |
| FP2              | ChEMBL1947227 |          | 0.762500   | 35.0     | *        |
| hybridization    | ChEMBL1627953 |          | 0.908297   | 120.0    | *        |
| substructure     | ChEMBL270250  |          | 0.928571   | 62.0     | *        |
| graph            | ChEMBL1823787 |          | 0.931818   | 126.0    | *        |
| pubchem          | ChEMBL270250  |          | 0.932773   | 62.0     | *        |
| cdk_maccs        | ChEMBL1627640 |          | 0.948718   | 130.0    | *        |
| klekota_roth     | ChEMBL135     |          | 0.878788   | 84000.0  | *        |

\*\*\* ic50 ACTIVITY \*\*\* value prediction

based on 13 locally validated fgps ---> 16832.382

["TT\_bits", "substructure", "cdk\_maccs", "Pattern", "FP2", "MFP1", "klekota\_roth", "pubchem", "graph", "AP\_bits", "FeatMFP1", "RDKit7", "hybridization"]

2 rank

Tubulin beta chain : Bos taurus

score: 10.783 on ChEMBL3394 based on 13 fingerprints

| Fingerprint type | Ligand        | Tanimoto | Similarity | activity | Valid fg |
|------------------|---------------|----------|------------|----------|----------|
| FeatMFP1         | ChEMBL265926  |          | 0.947368   | 4800.0   | *        |
| MFP1             | ChEMBL241993  |          | 0.733333   | 17000.0  | *        |
| RDKit7           | ChEMBL241993  |          | 0.692575   | 17000.0  | *        |
| Pattern          | ChEMBL1627838 |          | 0.903169   | 8600.0   | *        |
| AP_bits          | ChEMBL1627439 |          | 0.618056   | 1100.0   | *        |
| TT_bits          | ChEMBL1627439 |          | 0.787879   | 1100.0   | *        |
| FP2              | ChEMBL241993  |          | 0.727273   | 17000.0  | *        |
| hybridization    | ChEMBL1628145 |          | 0.945946   | 2400.0   | *        |
| substructure     | ChEMBL389126  |          | 0.928571   | 4900.0   | *        |
| graph            | ChEMBL1627436 |          | 0.813953   | 9400.0   | *        |
| pubchem          | ChEMBL1627439 |          | 0.932773   | 1100.0   | *        |
| cdk_maccs        | ChEMBL265926  |          | 0.897436   | 4800.0   | *        |
| klekota_roth     | ChEMBL265926  |          | 0.855072   | 4800.0   | *        |

\*\*\* ic50 ACTIVITY \*\*\* value prediction

based on 13 locally validated fgps ---> 7904.002

["TT\_bits", "substructure", "cdk\_maccs", "Pattern", "FP2", "MFP1", "klekota\_roth", "pubchem", "graph", "AP\_bits", "FeatMFP1", "RDKit7", "hybridization"]

3 rank

Glucocorticoid receptor : Homo sapiens

score: 10.562 on ChEMBL2034 based on 13 fingerprints

| Fingerprint type | Ligand       | Tanimoto | Similarity | activity  | Valid fg |
|------------------|--------------|----------|------------|-----------|----------|
| FeatMFP1         | ChEMBL135    |          | 0.789474   | 41422.000 | *        |
| MFP1             | ChEMBL135    |          | 0.758621   | 41422.000 | *        |
| RDKit7           | ChEMBL135    |          | 0.722429   | 41422.000 | *        |
| Pattern          | ChEMBL282575 |          | 0.919105   | 5074.000  | *        |
| AP_bits          | ChEMBL135    |          | 0.558491   | 41422.000 | *        |
| TT_bits          | ChEMBL135    |          | 0.742424   | 41422.000 | *        |
| FP2              | ChEMBL135    |          | 0.675325   | 41422.000 | *        |
| hybridization    | ChEMBL135    |          | 0.905405   | 41422.000 | *        |
| substructure     | ChEMBL469944 |          | 0.928571   | 1.300     | *        |
| graph            | ChEMBL1766   |          | 0.914894   | 2.573     | *        |

```

pubchem      CHEMBL135      0.915254  41422.000      *
cdk_maccs    CHEMBL1256102  0.853659  15848.930      *
klekota_roth CHEMBL135      0.878788  41422.000      *
*** ic50 ACTIVITY *** value prediction
based on 13 locally validated fgps ---> 26907.660
["TT_bits", "substructure", "cdk_maccs", "Pattern", "FP2", "MFP1",
"klekota_roth", "pubchem", "graph", "AP_bits", "FeatMFP1", "RDKit7",
"hybridization"]

```

4 rank

Androgen Receptor : Rattus norvegicus

score: 10.555 on CHEMBL3072 based on 13 fingerprints

| Fingerprint type | Ligand       | Tanimoto | Similarity | activity | Valid fg |
|------------------|--------------|----------|------------|----------|----------|
| FeatMFP1         | CHEMBL135    |          | 0.789474   | 353.00   | *        |
| MFP1             | CHEMBL467987 |          | 0.785714   | 8511.38  | *        |
| RDKit7           | CHEMBL135    |          | 0.722429   | 353.00   | *        |
| Pattern          | CHEMBL282575 |          | 0.919105   | 10.00    | *        |
| AP_bits          | CHEMBL467987 |          | 0.572993   | 8511.38  | *        |
| TT_bits          | CHEMBL467987 |          | 0.757576   | 8511.38  | *        |
| FP2              | CHEMBL135    |          | 0.675325   | 353.00   | *        |
| hybridization    | CHEMBL135    |          | 0.905405   | 353.00   | *        |
| substructure     | CHEMBL135    |          | 0.857143   | 353.00   | *        |
| graph            | CHEMBL139841 |          | 0.933333   | 41200.00 | *        |
| pubchem          | CHEMBL135    |          | 0.915254   | 353.00   | *        |
| cdk_maccs        | CHEMBL135    |          | 0.842105   | 353.00   | *        |
| klekota_roth     | CHEMBL135    |          | 0.878788   | 353.00   | *        |

```

*** ic50 ACTIVITY *** value prediction
based on 13 locally validated fgps ---> 23995.105
["TT_bits", "substructure", "cdk_maccs", "Pattern", "FP2", "MFP1",
"klekota_roth", "pubchem", "graph", "AP_bits", "FeatMFP1", "RDKit7",
"hybridization"]

```

5 rank

Estrogen receptor alpha : Homo sapiens

score: 10.539 on CHEMBL206 based on 13 fingerprints

| Fingerprint type | Ligand        | Tanimoto | Similarity | activity | Valid fg |
|------------------|---------------|----------|------------|----------|----------|
| FeatMFP1         | CHEMBL135     |          | 0.789474   | 0.41     | *        |
| MFP1             | CHEMBL135     |          | 0.758621   | 0.41     | *        |
| RDKit7           | CHEMBL135     |          | 0.722429   | 0.41     | *        |
| Pattern          | CHEMBL282575  |          | 0.919105   | 65.00    | *        |
| AP_bits          | CHEMBL135     |          | 0.558491   | 0.41     | *        |
| TT_bits          | CHEMBL135     |          | 0.742424   | 0.41     | *        |
| FP2              | CHEMBL135     |          | 0.675325   | 0.41     | *        |
| hybridization    | CHEMBL135     |          | 0.905405   | 0.41     | *        |
| substructure     | CHEMBL1628029 |          | 0.928571   | 193.00   | *        |
| graph            | CHEMBL1257167 |          | 0.891304   | 15848.93 | *        |
| pubchem          | CHEMBL135     |          | 0.915254   | 0.41     | *        |
| cdk_maccs        | CHEMBL1256102 |          | 0.853659   | 15848.93 | *        |
| klekota_roth     | CHEMBL135     |          | 0.878788   | 0.41     | *        |

```

*** ic50 ACTIVITY *** value prediction
based on 13 locally validated fgps ---> 4983.664
["TT_bits", "substructure", "cdk_maccs", "Pattern", "FP2", "MFP1",
"klekota_roth", "pubchem", "graph", "AP_bits", "FeatMFP1", "RDKit7",
"hybridization"]

```

6 rank

Estrogen receptor beta : Homo sapiens

score: 10.520 on CHEMBL242 based on 13 fingerprints

| Fingerprint type | Ligand    | Tanimoto | Similarity | activity | Valid fg |
|------------------|-----------|----------|------------|----------|----------|
| FeatMFP1         | CHEMBL135 |          | 0.789474   | 0.046    | *        |

| Fingerprint type | Ligand        | Tanimoto Similarity | activity  | Valid fg |
|------------------|---------------|---------------------|-----------|----------|
| MFP1             | CHEMBL135     | 0.758621            | 0.046     | *        |
| RDKit7           | CHEMBL135     | 0.722429            | 0.046     | *        |
| Pattern          | CHEMBL511812  | 0.900000            | 660.000   | *        |
| AP_bits          | CHEMBL135     | 0.558491            | 0.046     | *        |
| TT_bits          | CHEMBL135     | 0.742424            | 0.046     | *        |
| FP2              | CHEMBL135     | 0.675325            | 0.046     | *        |
| hybridization    | CHEMBL135     | 0.905405            | 0.046     | *        |
| substructure     | CHEMBL1628029 | 0.928571            | 267.000   | *        |
| graph            | CHEMBL1257167 | 0.891304            | 4045.760  | *        |
| pubchem          | CHEMBL135     | 0.915254            | 0.046     | *        |
| cdk_maccs        | CHEMBL1256102 | 0.853659            | 11857.690 | *        |
| klekota_roth     | CHEMBL135     | 0.878788            | 0.046     | *        |

\*\*\* ic50 ACTIVITY \*\*\* value prediction  
based on 13 locally validated fgps ---> 1987.543  
["TT\_bits", "substructure", "cdk\_maccs", "Pattern", "FP2", "MFP1",  
"klekota\_roth", "pubchem", "graph", "AP\_bits", "FeatMFP1", "RDKit7",  
"hybridization"]

7 rank

Progesterone receptor : Bos taurus

score: 10.479 on CHEMBL1909044 based on 13 fingerprints

| Fingerprint type | Ligand       | Tanimoto Similarity | activity | Valid fg |
|------------------|--------------|---------------------|----------|----------|
| FeatMFP1         | CHEMBL135    | 0.789474            | 32559.0  | *        |
| MFP1             | CHEMBL135    | 0.758621            | 32559.0  | *        |
| RDKit7           | CHEMBL135    | 0.722429            | 32559.0  | *        |
| Pattern          | CHEMBL282575 | 0.919105            | 9608.0   | *        |
| AP_bits          | CHEMBL135    | 0.558491            | 32559.0  | *        |
| TT_bits          | CHEMBL135    | 0.742424            | 32559.0  | *        |
| FP2              | CHEMBL135    | 0.675325            | 32559.0  | *        |
| hybridization    | CHEMBL135    | 0.905405            | 32559.0  | *        |
| substructure     | CHEMBL135    | 0.857143            | 32559.0  | *        |
| graph            | CHEMBL1766   | 0.914894            | 84.0     | *        |
| pubchem          | CHEMBL135    | 0.915254            | 32559.0  | *        |
| cdk_maccs        | CHEMBL135    | 0.842105            | 32559.0  | *        |
| klekota_roth     | CHEMBL135    | 0.878788            | 32559.0  | *        |

\*\*\* ic50 ACTIVITY \*\*\* value prediction  
based on 13 locally validated fgps ---> 19730.947  
["TT\_bits", "substructure", "cdk\_maccs", "Pattern", "FP2", "MFP1",  
"klekota\_roth", "pubchem", "graph", "AP\_bits", "FeatMFP1", "RDKit7",  
"hybridization"]

8 rank

Androgen Receptor : Homo sapiens

score: 10.462 on CHEMBL1871 based on 13 fingerprints

| Fingerprint type | Ligand        | Tanimoto Similarity | activity | Valid fg |
|------------------|---------------|---------------------|----------|----------|
| FeatMFP1         | CHEMBL135     | 0.789474            | 19.1     | *        |
| MFP1             | CHEMBL135     | 0.758621            | 19.1     | *        |
| RDKit7           | CHEMBL135     | 0.722429            | 19.1     | *        |
| Pattern          | CHEMBL3421871 | 0.881864            | 300.0    | *        |
| AP_bits          | CHEMBL135     | 0.558491            | 19.1     | *        |
| TT_bits          | CHEMBL135     | 0.742424            | 19.1     | *        |
| FP2              | CHEMBL135     | 0.675325            | 19.1     | *        |
| hybridization    | CHEMBL135     | 0.905405            | 19.1     | *        |
| substructure     | CHEMBL135     | 0.857143            | 19.1     | *        |
| graph            | CHEMBL236699  | 0.934783            | 410.0    | *        |
| pubchem          | CHEMBL135     | 0.915254            | 19.1     | *        |
| cdk_maccs        | CHEMBL135     | 0.842105            | 19.1     | *        |
| klekota_roth     | CHEMBL135     | 0.878788            | 19.1     | *        |

\*\*\* ic50 ACTIVITY \*\*\* value prediction  
based on 13 locally validated fgps ---> 319.119

["TT\_bits", "substructure", "cdk\_maccs", "Pattern", "FP2", "MFP1",  
"klekota\_roth", "pubchem", "graph", "AP\_bits", "FeatMFP1", "RDKit7",  
"hybridization"]

9 rank

Serotonin transporter : Homo sapiens

score: 10.379 on ChEMBL228 based on 13 fingerprints

| Fingerprint type | Ligand       | Tanimoto | Similarity | activity | Valid | fg |
|------------------|--------------|----------|------------|----------|-------|----|
| FeatMFP1         | ChEMBL135    |          | 0.789474   | 10755.0  | *     |    |
| MFP1             | ChEMBL135    |          | 0.758621   | 10755.0  | *     |    |
| RDKit7           | ChEMBL135    |          | 0.722429   | 10755.0  | *     |    |
| Pattern          | ChEMBL282575 |          | 0.919105   | 3672.0   | *     |    |
| AP_bits          | ChEMBL135    |          | 0.558491   | 10755.0  | *     |    |
| TT_bits          | ChEMBL135    |          | 0.742424   | 10755.0  | *     |    |
| FP2              | ChEMBL135    |          | 0.675325   | 10755.0  | *     |    |
| hybridization    | ChEMBL135    |          | 0.905405   | 10755.0  | *     |    |
| substructure     | ChEMBL135    |          | 0.857143   | 10755.0  | *     |    |
| graph            | ChEMBL135    |          | 0.813953   | 10755.0  | *     |    |
| pubchem          | ChEMBL135    |          | 0.915254   | 10755.0  | *     |    |
| cdk_maccs        | ChEMBL135    |          | 0.842105   | 10755.0  | *     |    |
| klekota_roth     | ChEMBL135    |          | 0.878788   | 10755.0  | *     |    |

\*\*\* ic50 ACTIVITY \*\*\* value prediction

based on 13 locally validated fgps ---> 8800.438

["TT\_bits", "substructure", "cdk\_maccs", "Pattern", "FP2", "MFP1",  
"klekota\_roth", "pubchem", "graph", "AP\_bits", "FeatMFP1", "RDKit7",  
"hybridization"]

10 rank

Dopamine transporter : Homo sapiens

score: 10.351 on ChEMBL238 based on 13 fingerprints

| Fingerprint type | Ligand    | Tanimoto | Similarity | activity | Valid | fg |
|------------------|-----------|----------|------------|----------|-------|----|
| FeatMFP1         | ChEMBL135 |          | 0.789474   | 14911.0  | *     |    |
| MFP1             | ChEMBL135 |          | 0.758621   | 14911.0  | *     |    |
| RDKit7           | ChEMBL135 |          | 0.722429   | 14911.0  | *     |    |
| Pattern          | ChEMBL691 |          | 0.891192   | 559.0    | *     |    |
| AP_bits          | ChEMBL135 |          | 0.558491   | 14911.0  | *     |    |
| TT_bits          | ChEMBL135 |          | 0.742424   | 14911.0  | *     |    |
| FP2              | ChEMBL135 |          | 0.675325   | 14911.0  | *     |    |
| hybridization    | ChEMBL135 |          | 0.905405   | 14911.0  | *     |    |
| substructure     | ChEMBL135 |          | 0.857143   | 14911.0  | *     |    |
| graph            | ChEMBL135 |          | 0.813953   | 14911.0  | *     |    |
| pubchem          | ChEMBL135 |          | 0.915254   | 14911.0  | *     |    |
| cdk_maccs        | ChEMBL135 |          | 0.842105   | 14911.0  | *     |    |
| klekota_roth     | ChEMBL135 |          | 0.878788   | 14911.0  | *     |    |

\*\*\* ic50 ACTIVITY \*\*\* value prediction

based on 13 locally validated fgps ---> 10703.291

["TT\_bits", "substructure", "cdk\_maccs", "Pattern", "FP2", "MFP1",  
"klekota\_roth", "pubchem", "graph", "AP\_bits", "FeatMFP1", "RDKit7",  
"hybridization"]

11 rank

Aldehyde oxidase : Homo sapiens

score: 10.351 on ChEMBL3257 based on 13 fingerprints

| Fingerprint type | Ligand    | Tanimoto | Similarity | activity | Valid | fg |
|------------------|-----------|----------|------------|----------|-------|----|
| FeatMFP1         | ChEMBL135 |          | 0.789474   | 80.0     | *     |    |
| MFP1             | ChEMBL135 |          | 0.758621   | 80.0     | *     |    |
| RDKit7           | ChEMBL135 |          | 0.722429   | 80.0     | *     |    |
| Pattern          | ChEMBL691 |          | 0.891192   | 570.0    | *     |    |
| AP_bits          | ChEMBL135 |          | 0.558491   | 80.0     | *     |    |
| TT_bits          | ChEMBL135 |          | 0.742424   | 80.0     | *     |    |

|               |           |          |      |   |
|---------------|-----------|----------|------|---|
| FP2           | CHEMBL135 | 0.675325 | 80.0 | * |
| hybridization | CHEMBL135 | 0.905405 | 80.0 | * |
| substructure  | CHEMBL135 | 0.857143 | 80.0 | * |
| graph         | CHEMBL135 | 0.813953 | 80.0 | * |
| pubchem       | CHEMBL135 | 0.915254 | 80.0 | * |
| cdk_maccs     | CHEMBL135 | 0.842105 | 80.0 | * |
| klekota_roth  | CHEMBL135 | 0.878788 | 80.0 | * |

\*\*\* ic50 ACTIVITY \*\*\* value prediction  
 based on 13 locally validated fgps ---> 223.658  
 ["TT\_bits", "substructure", "cdk\_maccs", "Pattern", "FP2", "MFP1",  
 "klekota\_roth", "pubchem", "graph", "AP\_bits", "FeatMFP1", "RDKit7",  
 "hybridization"]

12 rank

Arachidonate 15-lipoxygenase : *Oryctolagus cuniculus*

score: 10.351 on ChEMBL4358 based on 13 fingerprints

| Fingerprint type | Ligand    | Tanimoto Similarity | activity | Valid fg |
|------------------|-----------|---------------------|----------|----------|
| FeatMFP1         | CHEMBL135 | 0.789474            | 11295.0  | *        |
| MFP1             | CHEMBL135 | 0.758621            | 11295.0  | *        |
| RDKit7           | CHEMBL135 | 0.722429            | 11295.0  | *        |
| Pattern          | CHEMBL691 | 0.891192            | 5678.0   | *        |
| AP_bits          | CHEMBL135 | 0.558491            | 11295.0  | *        |
| TT_bits          | CHEMBL135 | 0.742424            | 11295.0  | *        |
| FP2              | CHEMBL135 | 0.675325            | 11295.0  | *        |
| hybridization    | CHEMBL135 | 0.905405            | 11295.0  | *        |
| substructure     | CHEMBL135 | 0.857143            | 11295.0  | *        |
| graph            | CHEMBL135 | 0.813953            | 11295.0  | *        |
| pubchem          | CHEMBL135 | 0.915254            | 11295.0  | *        |
| cdk_maccs        | CHEMBL135 | 0.842105            | 11295.0  | *        |
| klekota_roth     | CHEMBL135 | 0.878788            | 11295.0  | *        |

\*\*\* ic50 ACTIVITY \*\*\* value prediction  
 based on 13 locally validated fgps ---> 9771.506  
 ["TT\_bits", "substructure", "cdk\_maccs", "Pattern", "FP2", "MFP1",  
 "klekota\_roth", "pubchem", "graph", "AP\_bits", "FeatMFP1", "RDKit7",  
 "hybridization"]

13 rank

Estrogen-related receptor alpha : *Homo sapiens*

score: 10.317 on ChEMBL3429 based on 13 fingerprints

| Fingerprint type | Ligand        | Tanimoto Similarity | activity | Valid fg |
|------------------|---------------|---------------------|----------|----------|
| FeatMFP1         | CHEMBL135     | 0.789474            | 3.6      | *        |
| MFP1             | CHEMBL135     | 0.758621            | 3.6      | *        |
| RDKit7           | CHEMBL135     | 0.722429            | 3.6      | *        |
| Pattern          | CHEMBL2326071 | 0.857143            | 637.8    | *        |
| AP_bits          | CHEMBL135     | 0.558491            | 3.6      | *        |
| TT_bits          | CHEMBL135     | 0.742424            | 3.6      | *        |
| FP2              | CHEMBL135     | 0.675325            | 3.6      | *        |
| hybridization    | CHEMBL135     | 0.905405            | 3.6      | *        |
| substructure     | CHEMBL135     | 0.857143            | 3.6      | *        |
| graph            | CHEMBL135     | 0.813953            | 3.6      | *        |
| pubchem          | CHEMBL135     | 0.915254            | 3.6      | *        |
| cdk_maccs        | CHEMBL135     | 0.842105            | 3.6      | *        |
| klekota_roth     | CHEMBL135     | 0.878788            | 3.6      | *        |

\*\*\* ic50 ACTIVITY \*\*\* value prediction  
 based on 13 locally validated fgps ---> 72.934  
 ["TT\_bits", "substructure", "cdk\_maccs", "Pattern", "FP2", "MFP1",  
 "klekota\_roth", "pubchem", "graph", "AP\_bits", "FeatMFP1", "RDKit7",  
 "hybridization"]

14 rank

Estrogen-related receptor beta : Homo sapiens

score: 10.317 on ChEMBL3751 based on 13 fingerprints

| Fingerprint type | Ligand        | Tanimoto Similarity | activity | Valid fg |
|------------------|---------------|---------------------|----------|----------|
| FeatMFP1         | CHEMBL135     | 0.789474            | 3.2      | *        |
| MFP1             | CHEMBL135     | 0.758621            | 3.2      | *        |
| RDKit7           | CHEMBL135     | 0.722429            | 3.2      | *        |
| Pattern          | CHEMBL2326071 | 0.857143            | 565.9    | *        |
| AP_bits          | CHEMBL135     | 0.558491            | 3.2      | *        |
| TT_bits          | CHEMBL135     | 0.742424            | 3.2      | *        |
| FP2              | CHEMBL135     | 0.675325            | 3.2      | *        |
| hybridization    | CHEMBL135     | 0.905405            | 3.2      | *        |
| substructure     | CHEMBL135     | 0.857143            | 3.2      | *        |
| graph            | CHEMBL135     | 0.813953            | 3.2      | *        |
| pubchem          | CHEMBL135     | 0.915254            | 3.2      | *        |
| cdk_maccs        | CHEMBL135     | 0.842105            | 3.2      | *        |
| klekota_roth     | CHEMBL135     | 0.878788            | 3.2      | *        |

\*\*\* ic50 ACTIVITY \*\*\* value prediction

based on 13 locally validated fgps ---> 55.498

["TT\_bits", "substructure", "cdk\_maccs", "Pattern", "FP2", "MFP1", "klekota\_roth", "pubchem", "graph", "AP\_bits", "FeatMFP1", "RDKit7", "hybridization"]

15 rank

Estradiol 17-beta-dehydrogenase 1 : Homo sapiens

score: 10.255 on ChEMBL3181 based on 13 fingerprints

| Fingerprint type | Ligand        | Tanimoto Similarity | activity | Valid fg |
|------------------|---------------|---------------------|----------|----------|
| FeatMFP1         | CHEMBL270250  | 0.789474            | 790.0    | *        |
| MFP1             | CHEMBL1627884 | 0.611111            | 4300.0   | *        |
| RDKit7           | CHEMBL1627455 | 0.711165            | 1000.0   | *        |
| Pattern          | CHEMBL270250  | 0.943860            | 790.0    | *        |
| AP_bits          | CHEMBL1627453 | 0.552632            | 420.0    | *        |
| TT_bits          | CHEMBL1627884 | 0.578947            | 4300.0   | *        |
| FP2              | CHEMBL270250  | 0.666667            | 790.0    | *        |
| hybridization    | CHEMBL270250  | 0.881579            | 790.0    | *        |
| substructure     | CHEMBL270250  | 0.928571            | 790.0    | *        |
| graph            | CHEMBL1627884 | 0.977273            | 4300.0   | *        |
| pubchem          | CHEMBL270250  | 0.932773            | 790.0    | *        |
| cdk_maccs        | CHEMBL1079595 | 0.800000            | 140.0    | *        |
| klekota_roth     | CHEMBL1627884 | 0.880597            | 4300.0   | *        |

\*\*\* ic50 ACTIVITY \*\*\* value prediction

based on 12 locally validated fgps ---> 1724.509

["TT\_bits", "substructure", "Pattern", "FP2", "MFP1", "klekota\_roth", "pubchem", "graph", "AP\_bits", "FeatMFP1", "RDKit7", "hybridization"]

16 rank

Solute carrier family 22 member 2 : Rattus norvegicus

score: 9.459 on ChEMBL1770032 based on 12 fingerprints

| Fingerprint type | Ligand    | Tanimoto Similarity | activity | Valid fg |
|------------------|-----------|---------------------|----------|----------|
| FeatMFP1         | CHEMBL135 | 0.789474            | 84800.0  | *        |
| MFP1             | CHEMBL135 | 0.758621            | 84800.0  | *        |
| RDKit7           | CHEMBL135 | 0.722429            | 84800.0  | *        |
| Pattern          | CHEMBL135 | 0.831858            | 84800.0  | *        |
| AP_bits          | CHEMBL135 | 0.558491            | 84800.0  | *        |
| TT_bits          | CHEMBL135 | 0.742424            | 84800.0  | *        |
| FP2              | CHEMBL135 | 0.675325            | 84800.0  | *        |
| hybridization    | CHEMBL135 | 0.905405            | 84800.0  | *        |
| substructure     | CHEMBL135 | 0.857143            | 84800.0  | *        |
| graph            | CHEMBL135 | 0.813953            | 84800.0  | *        |
| pubchem          | CHEMBL135 | 0.915254            | 84800.0  | *        |
| cdk_maccs        | CHEMBL135 | 0.842105            | 84800.0  | *        |

```

    klekota_roth CHEMBL135          0.878788    84800.0      *
    *** ic50 ACTIVITY *** value prediction
    based on 12 locally validated fgps ---> 81435.582
["TT_bits", "substructure", "cdk_maccs", "AP_bits", "MFP1",
"klekota_roth", "pubchem", "graph", "FP2", "FeatMFP1", "RDKit7",
"hybridization"]

```

17 rank

Voltage-gated L-type calcium channel alpha-1C subunit : Homo sapiens  
score: 9.459 on CHEMBL1940 based on 12 fingerprints

| Fingerprint type | Ligand    | Tanimoto Similarity | activity | Valid fg |
|------------------|-----------|---------------------|----------|----------|
| FeatMFP1         | CHEMBL135 | 0.789474            | 50000.0  | *        |
| MFP1             | CHEMBL135 | 0.758621            | 50000.0  | *        |
| RDKit7           | CHEMBL135 | 0.722429            | 50000.0  | *        |
| Pattern          | CHEMBL135 | 0.831858            | 50000.0  |          |
| AP_bits          | CHEMBL135 | 0.558491            | 50000.0  | *        |
| TT_bits          | CHEMBL135 | 0.742424            | 50000.0  | *        |
| FP2              | CHEMBL135 | 0.675325            | 50000.0  | *        |
| hybridization    | CHEMBL135 | 0.905405            | 50000.0  | *        |
| substructure     | CHEMBL135 | 0.857143            | 50000.0  | *        |
| graph            | CHEMBL135 | 0.813953            | 50000.0  | *        |
| pubchem          | CHEMBL135 | 0.915254            | 50000.0  | *        |
| cdk_maccs        | CHEMBL135 | 0.842105            | 50000.0  | *        |
| klekota_roth     | CHEMBL135 | 0.878788            | 50000.0  | *        |

```

    *** ic50 ACTIVITY *** value prediction
    based on 12 locally validated fgps ---> 47918.083
["TT_bits", "substructure", "cdk_maccs", "AP_bits", "MFP1",
"klekota_roth", "pubchem", "graph", "FP2", "FeatMFP1", "RDKit7",
"hybridization"]

```

18 rank

Solute carrier family 22 member 3 : Homo sapiens

score: 9.459 on CHEMBL2073673 based on 12 fingerprints

| Fingerprint type | Ligand    | Tanimoto Similarity | activity | Valid fg |
|------------------|-----------|---------------------|----------|----------|
| FeatMFP1         | CHEMBL135 | 0.789474            | 2880.0   | *        |
| MFP1             | CHEMBL135 | 0.758621            | 2880.0   | *        |
| RDKit7           | CHEMBL135 | 0.722429            | 2880.0   | *        |
| Pattern          | CHEMBL135 | 0.831858            | 2880.0   |          |
| AP_bits          | CHEMBL135 | 0.558491            | 2880.0   | *        |
| TT_bits          | CHEMBL135 | 0.742424            | 2880.0   | *        |
| FP2              | CHEMBL135 | 0.675325            | 2880.0   | *        |
| hybridization    | CHEMBL135 | 0.905405            | 2880.0   | *        |
| substructure     | CHEMBL135 | 0.857143            | 2880.0   | *        |
| graph            | CHEMBL135 | 0.813953            | 2880.0   | *        |
| pubchem          | CHEMBL135 | 0.915254            | 2880.0   | *        |
| cdk_maccs        | CHEMBL135 | 0.842105            | 2880.0   | *        |
| klekota_roth     | CHEMBL135 | 0.878788            | 2880.0   | *        |

```

    *** ic50 ACTIVITY *** value prediction
    based on 12 locally validated fgps ---> 2880.000
["TT_bits", "substructure", "cdk_maccs", "AP_bits", "MFP1",
"klekota_roth", "pubchem", "graph", "FP2", "FeatMFP1", "RDKit7",
"hybridization"]

```

19 rank

Estrogen receptor alpha : Rattus norvegicus

score: 9.459 on CHEMBL2724 based on 12 fingerprints

| Fingerprint type | Ligand    | Tanimoto Similarity | activity | Valid fg |
|------------------|-----------|---------------------|----------|----------|
| FeatMFP1         | CHEMBL135 | 0.789474            | 1.9      | *        |
| MFP1             | CHEMBL135 | 0.758621            | 1.9      | *        |
| RDKit7           | CHEMBL135 | 0.722429            | 1.9      | *        |

|               |           |          |     |   |
|---------------|-----------|----------|-----|---|
| Pattern       | CHEMBL135 | 0.831858 | 1.9 |   |
| AP_bits       | CHEMBL135 | 0.558491 | 1.9 | * |
| TT_bits       | CHEMBL135 | 0.742424 | 1.9 | * |
| FP2           | CHEMBL135 | 0.675325 | 1.9 | * |
| hybridization | CHEMBL135 | 0.905405 | 1.9 | * |
| substructure  | CHEMBL135 | 0.857143 | 1.9 | * |
| graph         | CHEMBL135 | 0.813953 | 1.9 | * |
| pubchem       | CHEMBL135 | 0.915254 | 1.9 | * |
| cdk_maccs     | CHEMBL135 | 0.842105 | 1.9 | * |
| klekota_roth  | CHEMBL135 | 0.878788 | 1.9 | * |

\*\*\* ic50 ACTIVITY \*\*\* value prediction  
based on 12 locally validated fgps ---> 2.190  
["TT\_bits", "substructure", "cdk\_maccs", "AP\_bits", "MFP1",  
"klekota\_roth", "pubchem", "graph", "FP2", "FeatMFP1", "RDKit7",  
"hybridization"]

20 rank  
Estrogen receptor beta : Rattus norvegicus  
score: 9.459 on ChEMBL3021 based on 12 fingerprints

| Fingerprint type | Ligand    | Tanimoto Similarity | activity | Valid fg |
|------------------|-----------|---------------------|----------|----------|
| FeatMFP1         | CHEMBL135 | 0.789474            | 1.7      | *        |
| MFP1             | CHEMBL135 | 0.758621            | 1.7      | *        |
| RDKit7           | CHEMBL135 | 0.722429            | 1.7      | *        |
| Pattern          | CHEMBL135 | 0.831858            | 1.7      |          |
| AP_bits          | CHEMBL135 | 0.558491            | 1.7      | *        |
| TT_bits          | CHEMBL135 | 0.742424            | 1.7      | *        |
| FP2              | CHEMBL135 | 0.675325            | 1.7      | *        |
| hybridization    | CHEMBL135 | 0.905405            | 1.7      | *        |
| substructure     | CHEMBL135 | 0.857143            | 1.7      | *        |
| graph            | CHEMBL135 | 0.813953            | 1.7      | *        |
| pubchem          | CHEMBL135 | 0.915254            | 1.7      | *        |
| cdk_maccs        | CHEMBL135 | 0.842105            | 1.7      | *        |
| klekota_roth     | CHEMBL135 | 0.878788            | 1.7      | *        |

\*\*\* ic50 ACTIVITY \*\*\* value prediction  
based on 12 locally validated fgps ---> 1.700  
["TT\_bits", "substructure", "cdk\_maccs", "AP\_bits", "MFP1",  
"klekota\_roth", "pubchem", "graph", "FP2", "FeatMFP1", "RDKit7",  
"hybridization"]

21 rank  
Testis-specific androgen-binding protein : Homo sapiens  
score: 9.459 on ChEMBL3305 based on 12 fingerprints

| Fingerprint type | Ligand    | Tanimoto Similarity | activity | Valid fg |
|------------------|-----------|---------------------|----------|----------|
| FeatMFP1         | CHEMBL135 | 0.789474            | 50.0     | *        |
| MFP1             | CHEMBL135 | 0.758621            | 50.0     | *        |
| RDKit7           | CHEMBL135 | 0.722429            | 50.0     | *        |
| Pattern          | CHEMBL135 | 0.831858            | 50.0     |          |
| AP_bits          | CHEMBL135 | 0.558491            | 50.0     | *        |
| TT_bits          | CHEMBL135 | 0.742424            | 50.0     | *        |
| FP2              | CHEMBL135 | 0.675325            | 50.0     | *        |
| hybridization    | CHEMBL135 | 0.905405            | 50.0     | *        |
| substructure     | CHEMBL135 | 0.857143            | 50.0     | *        |
| graph            | CHEMBL135 | 0.813953            | 50.0     | *        |
| pubchem          | CHEMBL135 | 0.915254            | 50.0     | *        |
| cdk_maccs        | CHEMBL135 | 0.842105            | 50.0     | *        |
| klekota_roth     | CHEMBL135 | 0.878788            | 50.0     | *        |

\*\*\* ic50 ACTIVITY \*\*\* value prediction  
based on 12 locally validated fgps ---> 446.587



["TT\_bits", "substructure", "cdk\_maccs", "AP\_bits", "MFP1",  
"klekota\_roth", "pubchem", "graph", "FP2", "FeatMFP1", "RDKit7",  
"hybridization"]

22 rank

Solute carrier family 22 member 1 : Homo sapiens

score: 9.459 on ChEMBL5685 based on 12 fingerprints

| Fingerprint type | Ligand    | Tanimoto Similarity | activity | Valid fg |
|------------------|-----------|---------------------|----------|----------|
| FeatMFP1         | ChEMBL135 | 0.789474            | 5730.0   | *        |
| MFP1             | ChEMBL135 | 0.758621            | 5730.0   | *        |
| RDKit7           | ChEMBL135 | 0.722429            | 5730.0   | *        |
| Pattern          | ChEMBL135 | 0.831858            | 5730.0   |          |
| AP_bits          | ChEMBL135 | 0.558491            | 5730.0   | *        |
| TT_bits          | ChEMBL135 | 0.742424            | 5730.0   | *        |
| FP2              | ChEMBL135 | 0.675325            | 5730.0   | *        |
| hybridization    | ChEMBL135 | 0.905405            | 5730.0   | *        |
| substructure     | ChEMBL135 | 0.857143            | 5730.0   | *        |
| graph            | ChEMBL135 | 0.813953            | 5730.0   | *        |
| pubchem          | ChEMBL135 | 0.915254            | 5730.0   | *        |
| cdk_maccs        | ChEMBL135 | 0.842105            | 5730.0   | *        |
| klekota_roth     | ChEMBL135 | 0.878788            | 5730.0   | *        |

\*\*\* ic50 ACTIVITY \*\*\* value prediction

based on 12 locally validated fgps ---> 7986.176

["TT\_bits", "substructure", "cdk\_maccs", "AP\_bits", "MFP1",  
"klekota\_roth", "pubchem", "graph", "FP2", "FeatMFP1", "RDKit7",  
"hybridization"]

23 rank

Glucose-6-phosphate 1-dehydrogenase : Homo sapiens

score: 8.592 on ChEMBL5347 based on 11 fingerprints

| Fingerprint type | Ligand        | Tanimoto Similarity | activity | Valid fg |
|------------------|---------------|---------------------|----------|----------|
| FeatMFP1         | ChEMBL1412489 | 0.789474            | 29100.0  | *        |
| MFP1             | ChEMBL467987  | 0.785714            | 72500.0  | *        |
| RDKit7           | ChEMBL467987  | 0.702768            | 72500.0  | *        |
| Pattern          | ChEMBL1412489 | 0.874346            | 29100.0  | *        |
| AP_bits          | ChEMBL467987  | 0.572993            | 72500.0  | *        |
| TT_bits          | ChEMBL467987  | 0.757576            | 72500.0  | *        |
| FP2              | ChEMBL467987  | 0.666667            | 72500.0  | *        |
| hybridization    | ChEMBL467987  | 0.873913            | 72500.0  | *        |
| substructure     | ChEMBL1412489 | 0.800000            | 29100.0  |          |
| graph            | ChEMBL2057301 | 0.813953            | 4300.0   | *        |
| pubchem          | ChEMBL1412489 | 0.887097            | 29100.0  | *        |
| cdk_maccs        | ChEMBL1412489 | 0.780488            | 29100.0  |          |
| klekota_roth     | ChEMBL467987  | 0.867647            | 72500.0  | *        |

\*\*\* ic50 ACTIVITY \*\*\* value prediction

based on 11 locally validated fgps ---> 51686.893

["TT\_bits", "Pattern", "FP2", "MFP1", "klekota\_roth", "pubchem", "graph",  
"AP\_bits", "FeatMFP1", "RDKit7", "hybridization"]

24 rank

Glucose-6-phosphate dehydrogenase-6-phosphogluconolactonase : Plasmodium  
berghei

score: 8.556 on ChEMBL1741212 based on 11 fingerprints

| Fingerprint type | Ligand        | Tanimoto Similarity | activity | Valid fg |
|------------------|---------------|---------------------|----------|----------|
| FeatMFP1         | ChEMBL1412489 | 0.789474            | 4020.0   | *        |
| MFP1             | ChEMBL467987  | 0.785714            | 20900.0  | *        |
| RDKit7           | ChEMBL467987  | 0.702768            | 20900.0  | *        |
| Pattern          | ChEMBL1412489 | 0.874346            | 4020.0   | *        |
| AP_bits          | ChEMBL467987  | 0.572993            | 20900.0  | *        |
| TT_bits          | ChEMBL467987  | 0.757576            | 20900.0  | *        |

|               | FP2           | CHEMBL467987 | 0.666667 | 20900.0 | * |
|---------------|---------------|--------------|----------|---------|---|
| hybridization | CHEMBL467987  | 0.873913     | 20900.0  | *       |   |
| substructure  | CHEMBL1736559 | 0.812500     | 35700.0  |         |   |
| graph         | CHEMBL1412489 | 0.777778     | 4020.0   | *       |   |
| pubchem       | CHEMBL1412489 | 0.887097     | 4020.0   | *       |   |
| cdk_maccs     | CHEMBL1412489 | 0.780488     | 4020.0   |         |   |
| klekota_roth  | CHEMBL467987  | 0.867647     | 20900.0  | *       |   |

\*\*\* ic50 ACTIVITY \*\*\* value prediction  
 based on 11 locally validated fgps ---> 14726.341  
 ["TT\_bits", "Pattern", "FP2", "MFP1", "klekota\_roth", "pubchem", "graph",  
 "AP\_bits", "FeatMFP1", "RDKit7", "hybridization"]

25 rank

M18 aspartyl aminopeptidase : Plasmodium falciparum 3D7

score: 7.575 on CHEMBL1293263 based on 10 fingerprints

| Fingerprint type | Ligand        | Tanimoto | Similarity | activity | Valid | fg |
|------------------|---------------|----------|------------|----------|-------|----|
| FeatMFP1         | CHEMBL1412489 | 0.789474 | 1220.0     | *        |       |    |
| MFP1             | CHEMBL1412489 | 0.700000 | 1220.0     | *        |       |    |
| RDKit7           | CHEMBL1412489 | 0.664062 | 1220.0     |          |       |    |
| Pattern          | CHEMBL1412489 | 0.874346 | 1220.0     | *        |       |    |
| AP_bits          | CHEMBL1412489 | 0.569343 | 1220.0     | *        |       |    |
| TT_bits          | CHEMBL1412489 | 0.652778 | 1220.0     | *        |       |    |
| FP2              | CHEMBL1412489 | 0.654321 | 1220.0     | *        |       |    |
| hybridization    | CHEMBL1412489 | 0.841667 | 1220.0     | *        |       |    |
| substructure     | CHEMBL1412489 | 0.800000 | 1220.0     |          |       |    |
| graph            | CHEMBL1412489 | 0.777778 | 1220.0     | *        |       |    |
| pubchem          | CHEMBL1412489 | 0.887097 | 1220.0     | *        |       |    |
| cdk_maccs        | CHEMBL1412489 | 0.780488 | 1220.0     |          |       |    |
| klekota_roth     | CHEMBL1412489 | 0.828571 | 1220.0     | *        |       |    |

\*\*\* ic50 ACTIVITY \*\*\* value prediction  
 based on 10 locally validated fgps ---> 1220.000  
 ["TT\_bits", "Pattern", "AP\_bits", "MFP1", "pubchem", "graph", "FP2",  
 "FeatMFP1", "klekota\_roth", "hybridization"]

26 rank

Mannose-6-phosphate isomerase : Homo sapiens

score: 7.575 on CHEMBL2758 based on 10 fingerprints

| Fingerprint type | Ligand        | Tanimoto | Similarity | activity | Valid | fg |
|------------------|---------------|----------|------------|----------|-------|----|
| FeatMFP1         | CHEMBL1412489 | 0.789474 | 29007.0    | *        |       |    |
| MFP1             | CHEMBL1412489 | 0.700000 | 29007.0    | *        |       |    |
| RDKit7           | CHEMBL1412489 | 0.664062 | 29007.0    |          |       |    |
| Pattern          | CHEMBL1412489 | 0.874346 | 29007.0    | *        |       |    |
| AP_bits          | CHEMBL1412489 | 0.569343 | 29007.0    | *        |       |    |
| TT_bits          | CHEMBL1412489 | 0.652778 | 29007.0    | *        |       |    |
| FP2              | CHEMBL1412489 | 0.654321 | 29007.0    | *        |       |    |
| hybridization    | CHEMBL1412489 | 0.841667 | 29007.0    | *        |       |    |
| substructure     | CHEMBL1412489 | 0.800000 | 29007.0    |          |       |    |
| graph            | CHEMBL1412489 | 0.777778 | 29007.0    | *        |       |    |
| pubchem          | CHEMBL1412489 | 0.887097 | 29007.0    | *        |       |    |
| cdk_maccs        | CHEMBL1412489 | 0.780488 | 29007.0    |          |       |    |
| klekota_roth     | CHEMBL1412489 | 0.828571 | 29007.0    | *        |       |    |

\*\*\* ic50 ACTIVITY \*\*\* value prediction  
 based on 10 locally validated fgps ---> 29007.000  
 ["TT\_bits", "Pattern", "AP\_bits", "MFP1", "pubchem", "graph", "FP2",  
 "FeatMFP1", "klekota\_roth", "hybridization"]

27 rank

Norepinephrine transporter : Homo sapiens

score: 7.407 on CHEMBL222 based on 10 fingerprints

| Fingerprint type | Ligand | Tanimoto | Similarity | activity | Valid | fg |
|------------------|--------|----------|------------|----------|-------|----|
|------------------|--------|----------|------------|----------|-------|----|

| Fingerprint type | Ligand        | Tanimoto | Similarity | activity | Valid fg |
|------------------|---------------|----------|------------|----------|----------|
| FeatMFP1         | CHEMBL691     | 0.636364 | 959.0      |          |          |
| MFP1             | CHEMBL282575  | 0.583333 | 17229.0    |          | *        |
| RDKit7           | CHEMBL691     | 0.688940 | 959.0      |          | *        |
| Pattern          | CHEMBL282575  | 0.919105 | 17229.0    |          | *        |
| AP_bits          | CHEMBL282575  | 0.538905 | 17229.0    |          | *        |
| TT_bits          | CHEMBL282575  | 0.641026 | 17229.0    |          | *        |
| FP2              | CHEMBL691     | 0.619048 | 959.0      |          |          |
| hybridization    | CHEMBL691     | 0.816327 | 959.0      |          | *        |
| substructure     | CHEMBL3769872 | 0.733333 | 33.0       |          |          |
| graph            | CHEMBL1200623 | 0.790698 | 2098.0     |          | *        |
| pubchem          | CHEMBL691     | 0.830645 | 959.0      |          | *        |
| cdk_maccs        | CHEMBL691     | 0.820513 | 959.0      |          | *        |
| klekota_roth     | CHEMBL691     | 0.777778 | 959.0      |          | *        |

\*\*\* ic50 ACTIVITY \*\*\* value prediction  
based on 10 locally validated fgps ---> 7547.598  
["TT\_bits", "cdk\_maccs", "Pattern", "MFP1", "klekota\_roth", "pubchem",  
"graph", "AP\_bits", "RDKit7", "hybridization"]

28 rank

Adenosine A3 receptor : Homo sapiens

score: 6.617 on ChEMBL256 based on 9 fingerprints

| Fingerprint type | Ligand       | Tanimoto | Similarity | activity | Valid fg |
|------------------|--------------|----------|------------|----------|----------|
| FeatMFP1         | CHEMBL691    | 0.636364 | 32925.0    |          |          |
| MFP1             | CHEMBL282575 | 0.583333 | 21780.0    |          | *        |
| RDKit7           | CHEMBL691    | 0.688940 | 32925.0    |          | *        |
| Pattern          | CHEMBL282575 | 0.919105 | 21780.0    |          | *        |
| AP_bits          | CHEMBL282575 | 0.538905 | 21780.0    |          | *        |
| TT_bits          | CHEMBL282575 | 0.641026 | 21780.0    |          | *        |
| FP2              | CHEMBL691    | 0.619048 | 32925.0    |          |          |
| hybridization    | CHEMBL691    | 0.816327 | 32925.0    |          | *        |
| substructure     | CHEMBL691    | 0.687500 | 32925.0    |          |          |
| graph            | CHEMBL691    | 0.767442 | 32925.0    |          |          |
| pubchem          | CHEMBL691    | 0.830645 | 32925.0    |          | *        |
| cdk_maccs        | CHEMBL691    | 0.820513 | 32925.0    |          | *        |
| klekota_roth     | CHEMBL691    | 0.777778 | 32925.0    |          | *        |

\*\*\* ic50 ACTIVITY \*\*\* value prediction  
based on 9 locally validated fgps ---> 27997.013  
["TT\_bits", "cdk\_maccs", "Pattern", "MFP1", "klekota\_roth", "pubchem",  
"AP\_bits", "RDKit7", "hybridization"]

29 rank

Nuclear receptor subfamily 1 group I member 3 : Homo sapiens

score: 6.144 on ChEMBL5503 based on 8 fingerprints

| Fingerprint type | Ligand        | Tanimoto | Similarity | activity | Valid fg |
|------------------|---------------|----------|------------|----------|----------|
| FeatMFP1         | CHEMBL691     | 0.636364 | 3000.0     |          |          |
| MFP1             | CHEMBL691     | 0.527778 | 3000.0     |          | *        |
| RDKit7           | CHEMBL691     | 0.688940 | 3000.0     |          | *        |
| Pattern          | CHEMBL691     | 0.891192 | 3000.0     |          | *        |
| AP_bits          | CHEMBL691     | 0.465574 | 3000.0     |          |          |
| TT_bits          | CHEMBL691     | 0.487805 | 3000.0     |          |          |
| FP2              | CHEMBL691     | 0.619048 | 3000.0     |          |          |
| hybridization    | CHEMBL691     | 0.816327 | 3000.0     |          | *        |
| substructure     | CHEMBL2311171 | 0.714286 | 1200.0     |          |          |
| graph            | CHEMBL2311171 | 0.790698 | 1200.0     |          | *        |
| pubchem          | CHEMBL691     | 0.830645 | 3000.0     |          | *        |
| cdk_maccs        | CHEMBL691     | 0.820513 | 3000.0     |          | *        |
| klekota_roth     | CHEMBL691     | 0.777778 | 3000.0     |          | *        |

\*\*\* ic50 ACTIVITY \*\*\* value prediction  
based on 8 locally validated fgps ---> 2674.102

["cdk\_maccs", "Pattern", "MFP1", "klekota\_roth", "pubchem", "graph", "RDKit7", "hybridization"]

30 rank

UDP-glucuronosyltransferase 1-1 : Homo sapiens

score: 5.353 on ChEMBL1287617 based on 7 fingerprints

| Fingerprint type | Ligand    | Tanimoto Similarity | activity | Valid fg |
|------------------|-----------|---------------------|----------|----------|
| FeatMFP1         | CHEMBL691 | 0.636364            | 21000.0  |          |
| MFP1             | CHEMBL691 | 0.527778            | 21000.0  | *        |
| RDKit7           | CHEMBL691 | 0.688940            | 21000.0  | *        |
| Pattern          | CHEMBL691 | 0.891192            | 21000.0  | *        |
| AP_bits          | CHEMBL691 | 0.465574            | 21000.0  |          |
| TT_bits          | CHEMBL691 | 0.487805            | 21000.0  |          |
| FP2              | CHEMBL691 | 0.619048            | 21000.0  |          |
| hybridization    | CHEMBL691 | 0.816327            | 21000.0  | *        |
| substructure     | CHEMBL691 | 0.687500            | 21000.0  |          |
| graph            | CHEMBL691 | 0.767442            | 21000.0  |          |
| pubchem          | CHEMBL691 | 0.830645            | 21000.0  | *        |
| cdk_maccs        | CHEMBL691 | 0.820513            | 21000.0  | *        |
| klekota_roth     | CHEMBL691 | 0.777778            | 21000.0  | *        |

\*\*\* ic50 ACTIVITY \*\*\* value prediction

based on 7 locally validated fgps ---> 21000.000

["Pattern", "MFP1", "pubchem", "klekota\_roth", "hybridization", "RDKit7", "cdk\_maccs"]

31 rank

Solute carrier family 22 member 2 : Homo sapiens

score: 5.353 on ChEMBL1743122 based on 7 fingerprints

| Fingerprint type | Ligand    | Tanimoto Similarity | activity | Valid fg |
|------------------|-----------|---------------------|----------|----------|
| FeatMFP1         | CHEMBL691 | 0.636364            | 2200.0   |          |
| MFP1             | CHEMBL691 | 0.527778            | 2200.0   | *        |
| RDKit7           | CHEMBL691 | 0.688940            | 2200.0   | *        |
| Pattern          | CHEMBL691 | 0.891192            | 2200.0   | *        |
| AP_bits          | CHEMBL691 | 0.465574            | 2200.0   |          |
| TT_bits          | CHEMBL691 | 0.487805            | 2200.0   |          |
| FP2              | CHEMBL691 | 0.619048            | 2200.0   |          |
| hybridization    | CHEMBL691 | 0.816327            | 2200.0   | *        |
| substructure     | CHEMBL691 | 0.687500            | 2200.0   |          |
| graph            | CHEMBL103 | 0.767442            | 26700.0  |          |
| pubchem          | CHEMBL691 | 0.830645            | 2200.0   | *        |
| cdk_maccs        | CHEMBL691 | 0.820513            | 2200.0   | *        |
| klekota_roth     | CHEMBL691 | 0.777778            | 2200.0   | *        |

\*\*\* ic50 ACTIVITY \*\*\* value prediction

based on 7 locally validated fgps ---> 2200.000

["Pattern", "MFP1", "pubchem", "klekota\_roth", "hybridization", "RDKit7", "cdk\_maccs"]

32 rank

Multidrug and toxin extrusion protein 1 : Homo sapiens

score: 5.353 on ChEMBL1743126 based on 7 fingerprints

| Fingerprint type | Ligand    | Tanimoto Similarity | activity | Valid fg |
|------------------|-----------|---------------------|----------|----------|
| FeatMFP1         | CHEMBL691 | 0.636364            | 21100.0  |          |
| MFP1             | CHEMBL691 | 0.527778            | 21100.0  | *        |
| RDKit7           | CHEMBL691 | 0.688940            | 21100.0  | *        |
| Pattern          | CHEMBL691 | 0.891192            | 21100.0  | *        |
| AP_bits          | CHEMBL691 | 0.465574            | 21100.0  |          |
| TT_bits          | CHEMBL691 | 0.487805            | 21100.0  |          |
| FP2              | CHEMBL691 | 0.619048            | 21100.0  |          |
| hybridization    | CHEMBL691 | 0.816327            | 21100.0  | *        |
| substructure     | CHEMBL691 | 0.687500            | 21100.0  |          |

```

graph CHEMBL691 0.767442 21100.0
pubchem CHEMBL691 0.830645 21100.0 *
cdk_maccs CHEMBL691 0.820513 21100.0 *
klekota_roth CHEMBL691 0.777778 21100.0 *
*** ic50 ACTIVITY *** value prediction
based on 7 locally validated fgps ---> 21100.000
["Pattern", "MFP1", "pubchem", "klekota_roth", "hybridization", "RDKit7",
"cdk_maccs"]

```

33 rank

Multidrug and toxin extrusion protein 2 : Homo sapiens

score: 5.353 on CHEMBL1743127 based on 7 fingerprints

| Fingerprint type | Ligand    | Tanimoto Similarity | activity | Valid fg |
|------------------|-----------|---------------------|----------|----------|
| FeatMFP1         | CHEMBL691 | 0.636364            | 20200.0  |          |
| MFP1             | CHEMBL691 | 0.527778            | 20200.0  | *        |
| RDKit7           | CHEMBL691 | 0.688940            | 20200.0  | *        |
| Pattern          | CHEMBL691 | 0.891192            | 20200.0  | *        |
| AP_bits          | CHEMBL691 | 0.465574            | 20200.0  |          |
| TT_bits          | CHEMBL691 | 0.487805            | 20200.0  |          |
| FP2              | CHEMBL691 | 0.619048            | 20200.0  |          |
| hybridization    | CHEMBL691 | 0.816327            | 20200.0  | *        |
| substructure     | CHEMBL691 | 0.687500            | 20200.0  |          |
| graph            | CHEMBL691 | 0.767442            | 20200.0  |          |
| pubchem          | CHEMBL691 | 0.830645            | 20200.0  | *        |
| cdk_maccs        | CHEMBL691 | 0.820513            | 20200.0  | *        |
| klekota_roth     | CHEMBL691 | 0.777778            | 20200.0  | *        |

```

*** ic50 ACTIVITY *** value prediction
based on 7 locally validated fgps ---> 20200.000
["Pattern", "MFP1", "pubchem", "klekota_roth", "hybridization", "RDKit7",
"cdk_maccs"]

```

34 rank

Mu opioid receptor : Homo sapiens

score: 5.353 on CHEMBL233 based on 7 fingerprints

| Fingerprint type | Ligand    | Tanimoto Similarity | activity | Valid fg |
|------------------|-----------|---------------------|----------|----------|
| FeatMFP1         | CHEMBL691 | 0.636364            | 26769.0  |          |
| MFP1             | CHEMBL691 | 0.527778            | 26769.0  | *        |
| RDKit7           | CHEMBL691 | 0.688940            | 26769.0  | *        |
| Pattern          | CHEMBL691 | 0.891192            | 26769.0  | *        |
| AP_bits          | CHEMBL691 | 0.465574            | 26769.0  |          |
| TT_bits          | CHEMBL691 | 0.487805            | 26769.0  |          |
| FP2              | CHEMBL691 | 0.619048            | 26769.0  |          |
| hybridization    | CHEMBL691 | 0.816327            | 26769.0  | *        |
| substructure     | CHEMBL691 | 0.687500            | 26769.0  |          |
| graph            | CHEMBL691 | 0.767442            | 26769.0  |          |
| pubchem          | CHEMBL691 | 0.830645            | 26769.0  | *        |
| cdk_maccs        | CHEMBL691 | 0.820513            | 26769.0  | *        |
| klekota_roth     | CHEMBL691 | 0.777778            | 26769.0  | *        |

```

*** ic50 ACTIVITY *** value prediction
based on 7 locally validated fgps ---> 26769.000
["Pattern", "MFP1", "pubchem", "klekota_roth", "hybridization", "RDKit7",
"cdk_maccs"]

```

35 rank

Kappa opioid receptor : Homo sapiens

score: 5.353 on CHEMBL237 based on 7 fingerprints

| Fingerprint type | Ligand      | Tanimoto Similarity | activity | Valid fg |
|------------------|-------------|---------------------|----------|----------|
| FeatMFP1         | CHEMBL68354 | 0.640000            | 3.8      |          |
| MFP1             | CHEMBL691   | 0.527778            | 25894.0  | *        |
| RDKit7           | CHEMBL691   | 0.688940            | 25894.0  | *        |

|               |           |          |         |   |
|---------------|-----------|----------|---------|---|
| Pattern       | CHEMBL691 | 0.891192 | 25894.0 | * |
| AP_bits       | CHEMBL691 | 0.465574 | 25894.0 |   |
| TT_bits       | CHEMBL691 | 0.487805 | 25894.0 |   |
| FP2           | CHEMBL691 | 0.619048 | 25894.0 |   |
| hybridization | CHEMBL691 | 0.816327 | 25894.0 | * |
| substructure  | CHEMBL691 | 0.687500 | 25894.0 |   |
| graph         | CHEMBL691 | 0.767442 | 25894.0 |   |
| pubchem       | CHEMBL691 | 0.830645 | 25894.0 | * |
| cdk_maccs     | CHEMBL691 | 0.820513 | 25894.0 | * |
| klekota_roth  | CHEMBL691 | 0.777778 | 25894.0 | * |

\*\*\* ic50 ACTIVITY \*\*\* value prediction  
 based on 7 locally validated fgps ---> 25894.000  
 ["Pattern", "MFP1", "pubchem", "klekota\_roth", "hybridization", "RDKit7",  
 "cdk\_maccs"]

36 rank

Adenosine A2a receptor : Homo sapiens

score: 5.353 on ChEMBL251 based on 7 fingerprints

| Fingerprint type | Ligand    | Tanimoto Similarity | activity | Valid fg |
|------------------|-----------|---------------------|----------|----------|
| FeatMFP1         | CHEMBL691 | 0.636364            | 20931.0  |          |
| MFP1             | CHEMBL691 | 0.527778            | 20931.0  | *        |
| RDKit7           | CHEMBL691 | 0.688940            | 20931.0  | *        |
| Pattern          | CHEMBL691 | 0.891192            | 20931.0  | *        |
| AP_bits          | CHEMBL691 | 0.465574            | 20931.0  |          |
| TT_bits          | CHEMBL691 | 0.487805            | 20931.0  |          |
| FP2              | CHEMBL691 | 0.619048            | 20931.0  |          |
| hybridization    | CHEMBL691 | 0.816327            | 20931.0  | *        |
| substructure     | CHEMBL691 | 0.687500            | 20931.0  |          |
| graph            | CHEMBL691 | 0.767442            | 20931.0  |          |
| pubchem          | CHEMBL691 | 0.830645            | 20931.0  | *        |
| cdk_maccs        | CHEMBL691 | 0.820513            | 20931.0  | *        |
| klekota_roth     | CHEMBL691 | 0.777778            | 20931.0  | *        |

\*\*\* ic50 ACTIVITY \*\*\* value prediction  
 based on 7 locally validated fgps ---> 20931.000  
 ["Pattern", "MFP1", "pubchem", "klekota\_roth", "hybridization", "RDKit7",  
 "cdk\_maccs"]

37 rank

Serotonin 4 (5-HT4) receptor : Cavia porcellus

score: 5.353 on ChEMBL5017 based on 7 fingerprints

| Fingerprint type | Ligand    | Tanimoto Similarity | activity | Valid fg |
|------------------|-----------|---------------------|----------|----------|
| FeatMFP1         | CHEMBL691 | 0.636364            | 7953.0   |          |
| MFP1             | CHEMBL691 | 0.527778            | 7953.0   | *        |
| RDKit7           | CHEMBL691 | 0.688940            | 7953.0   | *        |
| Pattern          | CHEMBL691 | 0.891192            | 7953.0   | *        |
| AP_bits          | CHEMBL691 | 0.465574            | 7953.0   |          |
| TT_bits          | CHEMBL691 | 0.487805            | 7953.0   |          |
| FP2              | CHEMBL691 | 0.619048            | 7953.0   |          |
| hybridization    | CHEMBL691 | 0.816327            | 7953.0   | *        |
| substructure     | CHEMBL691 | 0.687500            | 7953.0   |          |
| graph            | CHEMBL691 | 0.767442            | 7953.0   |          |
| pubchem          | CHEMBL691 | 0.830645            | 7953.0   | *        |
| cdk_maccs        | CHEMBL691 | 0.820513            | 7953.0   | *        |
| klekota_roth     | CHEMBL691 | 0.777778            | 7953.0   | *        |

\*\*\* ic50 ACTIVITY \*\*\* value prediction  
 based on 7 locally validated fgps ---> 7953.000  
 ["Pattern", "MFP1", "pubchem", "klekota\_roth", "hybridization", "RDKit7",  
 "cdk\_maccs"]

38 rank

Tubulin : Bos taurus

score: 5.303 on ChEMBL2111464 based on 7 fingerprints

| Fingerprint type | Ligand        | Tanimoto | Similarity | activity | Valid fg |
|------------------|---------------|----------|------------|----------|----------|
| FeatMFP1         | CHEMBL1627442 |          | 0.652174   | 660.0    |          |
| MFP1             | CHEMBL299613  |          | 0.687500   | 1400.0   | *        |
| RDKit7           | CHEMBL299613  |          | 0.669318   | 1400.0   |          |
| Pattern          | CHEMBL1627442 |          | 0.885563   | 660.0    | *        |
| AP_bits          | CHEMBL299613  |          | 0.553265   | 1400.0   | *        |
| TT_bits          | CHEMBL299613  |          | 0.735294   | 1400.0   | *        |
| FP2              | CHEMBL299613  |          | 0.597701   | 1400.0   |          |
| hybridization    | CHEMBL299613  |          | 0.755639   | 1400.0   | *        |
| substructure     | CHEMBL1627442 |          | 0.866667   | 660.0    | *        |
| graph            | CHEMBL299613  |          | 0.614035   | 1400.0   |          |
| pubchem          | CHEMBL299613  |          | 0.785185   | 1400.0   |          |
| cdk_maccs        | CHEMBL299613  |          | 0.744186   | 1400.0   |          |
| klekota_roth     | CHEMBL299613  |          | 0.819444   | 1400.0   | *        |

\*\*\* ic50 ACTIVITY \*\*\* value prediction

based on 7 locally validated fgps ---> 1070.962

["TT\_bits", "substructure", "Pattern", "MFP1", "AP\_bits", "klekota\_roth", "hybridization"]

39 rank

Cytochrome P450 3A4 : Homo sapiens

score: 5.240 on ChEMBL340 based on 7 fingerprints

| Fingerprint type | Ligand       | Tanimoto | Similarity | activity | Valid fg |
|------------------|--------------|----------|------------|----------|----------|
| FeatMFP1         | CHEMBL410242 |          | 0.625000   | 1500.0   |          |
| MFP1             | CHEMBL410242 |          | 0.512195   | 1500.0   |          |
| RDKit7           | CHEMBL410242 |          | 0.644468   | 1500.0   |          |
| Pattern          | CHEMBL410242 |          | 0.910596   | 1500.0   | *        |
| AP_bits          | CHEMBL410242 |          | 0.539945   | 1500.0   | *        |
| TT_bits          | CHEMBL410242 |          | 0.511628   | 1500.0   | *        |
| FP2              | CHEMBL410242 |          | 0.557895   | 1500.0   |          |
| hybridization    | CHEMBL410242 |          | 0.825397   | 1500.0   | *        |
| substructure     | CHEMBL410242 |          | 0.722222   | 1500.0   |          |
| graph            | CHEMBL1451   |          | 0.895833   | 49100.0  | *        |
| pubchem          | CHEMBL469227 |          | 0.834711   | 2770.0   | *        |
| cdk_maccs        | CHEMBL539168 |          | 0.711111   | 3364.0   |          |
| klekota_roth     | CHEMBL410242 |          | 0.721519   | 1500.0   | *        |

\*\*\* ic50 ACTIVITY \*\*\* value prediction

based on 7 locally validated fgps ---> 6546.329

["TT\_bits", "Pattern", "AP\_bits", "pubchem", "graph", "klekota\_roth", "hybridization"]

40 rank

Multidrug resistance-associated protein 4 : Homo sapiens

score: 4.945 on ChEMBL1743128 based on 7 fingerprints

| Fingerprint type | Ligand        | Tanimoto | Similarity | activity | Valid fg |
|------------------|---------------|----------|------------|----------|----------|
| FeatMFP1         | CHEMBL1697724 |          | 0.535714   | 30000.0  |          |
| MFP1             | CHEMBL3349339 |          | 0.583333   | 50000.0  | *        |
| RDKit7           | CHEMBL3349339 |          | 0.651366   | 50000.0  |          |
| Pattern          | CHEMBL3349339 |          | 0.882960   | 50000.0  | *        |
| AP_bits          | CHEMBL3349339 |          | 0.470238   | 50000.0  | *        |
| TT_bits          | CHEMBL3349339 |          | 0.666667   | 50000.0  | *        |
| FP2              | CHEMBL3349339 |          | 0.525253   | 50000.0  |          |
| hybridization    | CHEMBL3349339 |          | 0.689420   | 50000.0  | *        |
| substructure     | CHEMBL3349339 |          | 0.631579   | 50000.0  |          |
| graph            | CHEMBL3349339 |          | 0.564516   | 50000.0  |          |
| pubchem          | CHEMBL3349339 |          | 0.868852   | 50000.0  | *        |
| cdk_maccs        | CHEMBL2074591 |          | 0.627451   | 80000.0  |          |
| klekota_roth     | CHEMBL3349339 |          | 0.783784   | 50000.0  | *        |

\*\*\* ic50 ACTIVITY \*\*\* value prediction  
 based on 7 locally validated fgps ---> 39849.623  
 ["TT\_bits", "Pattern", "MFP1", "pubchem", "AP\_bits", "klekota\_roth",  
 "hybridization"]

41 rank

Protein-tyrosine phosphatase 2C : Homo sapiens

score: 4.881 on ChEMBL3864 based on 7 fingerprints

| Fingerprint type | Ligand        | Tanimoto | Similarity | activity | Valid fg |
|------------------|---------------|----------|------------|----------|----------|
| FeatMFP1         | ChEMBL461415  |          | 0.555556   | 2270.0   |          |
| MFP1             | ChEMBL1642763 |          | 0.526316   | 19900.0  | *        |
| RDKit7           | ChEMBL1642763 |          | 0.662971   | 19900.0  |          |
| Pattern          | ChEMBL1642763 |          | 0.881443   | 19900.0  | *        |
| AP_bits          | ChEMBL518627  |          | 0.475000   | 3910.0   | *        |
| TT_bits          | ChEMBL1642763 |          | 0.600000   | 19900.0  | *        |
| FP2              | ChEMBL1642763 |          | 0.576087   | 19900.0  |          |
| hybridization    | ChEMBL1642763 |          | 0.742647   | 19900.0  | *        |
| substructure     | ChEMBL1642763 |          | 0.578947   | 19900.0  |          |
| graph            | ChEMBL230006  |          | 0.727273   | 9600.0   |          |
| pubchem          | ChEMBL1642763 |          | 0.856000   | 19900.0  | *        |
| cdk_maccs        | ChEMBL461199  |          | 0.704545   | 6400.0   |          |
| klekota_roth     | ChEMBL1642763 |          | 0.800000   | 19900.0  | *        |

\*\*\* ic50 ACTIVITY \*\*\* value prediction  
 based on 7 locally validated fgps ---> 16500.755  
 ["TT\_bits", "Pattern", "MFP1", "pubchem", "AP\_bits", "klekota\_roth",  
 "hybridization"]



# SwissTargetPrediction report:

## Reference:

Gfeller D., Michielin O. & Zoete V.  
 Shaping the interaction landscape of  
 bioactive molecules, *Bioinformatics*  
 (2013) 29:3073-3079.

## Query Molecule

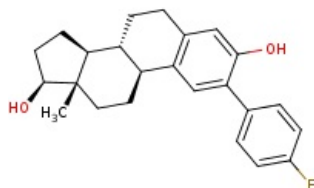

## Frequency of Target Class

| Target                                                                                      | Uniprot ID | Gene code | ChEMBL ID  | Probability            | # sim. cmpds (3D / 2D) | Target Class      |
|---------------------------------------------------------------------------------------------|------------|-----------|------------|------------------------|------------------------|-------------------|
| cDNA FLJ16289 fis, clone OCBBF2009920, highly similar to TUBULIN BETA-3 CHAIN (by homology) | A8K854     | TUBB3     |            | <div><div></div></div> | 3 / 12                 | Structural        |
| Uncharacterized protein (by homology)                                                       | I3L2F9     |           |            | <div><div></div></div> | 3 / 12                 | Structural        |
| Tubulin beta-4A chain (by homology)                                                         | P04350     | TUBB4A    | CHEMBL3838 | <div><div></div></div> | 3 / 12                 | Structural        |
| Tubulin beta chain (by homology)                                                            | P07437     | TUBB      | CHEMBL5444 | <div><div></div></div> | 3 / 12                 | Structural        |
| Tubulin beta-4B chain (by homology)                                                         | P68371     | TUBB4B    | CHEMBL1848 | <div><div></div></div> | 3 / 12                 | Structural        |
| Melanocyte-stimulating hormone receptor (by homology)                                       | Q01726     | MC1R      | CHEMBL3795 | <div><div></div></div> | 9 / 12                 | Membrane receptor |
| Tubulin beta-3 chain (by homology)                                                          | Q13509     | TUBB3     | CHEMBL2597 | <div><div></div></div> | 3 / 12                 | Structural        |
| Tubulin beta-2A chain (by homology)                                                         | Q13885     | TUBB2A    |            | <div><div></div></div> | 3 / 12                 | Structural        |
| Tubulin beta-6 chain (by homology)                                                          | Q9BUF5     | TUBB6     |            | <div><div></div></div> | 3 / 12                 | Structural        |
| Tubulin beta-2B chain (by homology)                                                         | Q9BVA1     | TUBB2B    |            | <div><div></div></div> | 3 / 12                 | Structural        |
| Steryl-sulfatase                                                                            | P08842     | STS       | CHEMBL3559 | <div><div></div></div> | 10 / 56                | Enzyme            |
| Arylsulfatase D (by homology)                                                               | P51689     | ARSD      |            | <div><div></div></div> | 10 / 56                | Enzyme            |
| Arylsulfatase E (by homology)                                                               | P51690     | ARSE      |            | <div><div></div></div> | 10 / 56                | Enzyme            |
| Arylsulfatase F (by homology)                                                               | P54793     | ARSF      |            | <div><div></div></div> | 10 / 56                | Enzyme            |
| Arylsulfatase H (by homology)                                                               | Q5FYA8     | ARSH      |            | <div><div></div></div> | 10 / 56                | Enzyme            |

# Polypharmacology Browser 2 Prediction:

Targets predicted using NN(ECfp4) + NB(ECfp4).

Save Table

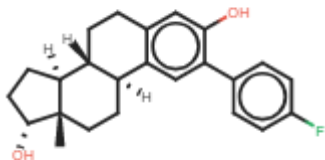

Query molecule

Target class overview

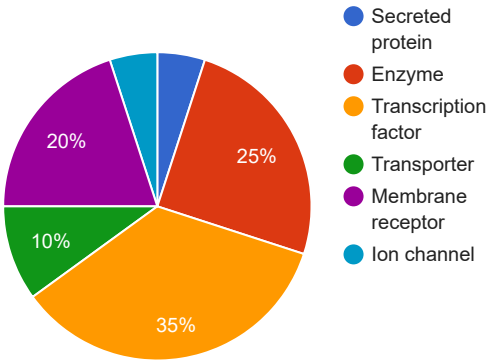

| Rank | ChEMBL ID                                                                                                                                              | Common name                                                | Nearest neighbours |
|------|--------------------------------------------------------------------------------------------------------------------------------------------------------|------------------------------------------------------------|--------------------|
| 1    | CHEMBL206 ( <a href="https://www.ebi.ac.uk/chembl/target/inspect/CHEMBL206">https://www.ebi.ac.uk/chembl/target/inspect/CHEMBL206</a> )                | Estrogen receptor alpha                                    | Show NN            |
| 2    | CHEMBL242 ( <a href="https://www.ebi.ac.uk/chembl/target/inspect/CHEMBL242">https://www.ebi.ac.uk/chembl/target/inspect/CHEMBL242</a> )                | Estrogen receptor beta                                     | Show NN            |
| 3    | CHEMBL3559 ( <a href="https://www.ebi.ac.uk/chembl/target/inspect/CHEMBL3559">https://www.ebi.ac.uk/chembl/target/inspect/CHEMBL3559</a> )             | Steryl-sulfatase                                           | Show NN            |
| 4    | CHEMBL3181 ( <a href="https://www.ebi.ac.uk/chembl/target/inspect/CHEMBL3181">https://www.ebi.ac.uk/chembl/target/inspect/CHEMBL3181</a> )             | Estradiol 17-beta-dehydrogenase 1                          | Show NN            |
| 5    | CHEMBL3305 ( <a href="https://www.ebi.ac.uk/chembl/target/inspect/CHEMBL3305">https://www.ebi.ac.uk/chembl/target/inspect/CHEMBL3305</a> )             | Testis-specific androgen-binding protein                   | Show NN            |
| 6    | CHEMBL228 ( <a href="https://www.ebi.ac.uk/chembl/target/inspect/CHEMBL228">https://www.ebi.ac.uk/chembl/target/inspect/CHEMBL228</a> )                | Serotonin transporter                                      | Show NN            |
| 7    | CHEMBL1871 ( <a href="https://www.ebi.ac.uk/chembl/target/inspect/CHEMBL1871">https://www.ebi.ac.uk/chembl/target/inspect/CHEMBL1871</a> )             | Androgen Receptor                                          | Show NN            |
| 8    | CHEMBL1978 ( <a href="https://www.ebi.ac.uk/chembl/target/inspect/CHEMBL1978">https://www.ebi.ac.uk/chembl/target/inspect/CHEMBL1978</a> )             | Cytochrome P450 19A1                                       | Show NN            |
| 9    | CHEMBL2034 ( <a href="https://www.ebi.ac.uk/chembl/target/inspect/CHEMBL2034">https://www.ebi.ac.uk/chembl/target/inspect/CHEMBL2034</a> )             | Glucocorticoid receptor                                    | Show NN            |
| 10   | CHEMBL208 ( <a href="https://www.ebi.ac.uk/chembl/target/inspect/CHEMBL208">https://www.ebi.ac.uk/chembl/target/inspect/CHEMBL208</a> )                | Progesterone receptor                                      | Show NN            |
| 11   | CHEMBL3072 ( <a href="https://www.ebi.ac.uk/chembl/target/inspect/CHEMBL3072">https://www.ebi.ac.uk/chembl/target/inspect/CHEMBL3072</a> )             | Androgen Receptor                                          | Show NN            |
| 12   | CHEMBL1994 ( <a href="https://www.ebi.ac.uk/chembl/target/inspect/CHEMBL1994">https://www.ebi.ac.uk/chembl/target/inspect/CHEMBL1994</a> )             | Mineralocorticoid receptor                                 | Show NN            |
| 13   | CHEMBL340 ( <a href="https://www.ebi.ac.uk/chembl/target/inspect/CHEMBL340">https://www.ebi.ac.uk/chembl/target/inspect/CHEMBL340</a> )                | Cytochrome P450 3A4                                        | Show NN            |
| 14   | CHEMBL1781859<br>( <a href="https://www.ebi.ac.uk/chembl/target/inspect/CHEMBL1781859">https://www.ebi.ac.uk/chembl/target/inspect/CHEMBL1781859</a> ) | Solute carrier organic anion transporter family member 1A1 | Show NN            |
| 15   | CHEMBL3602 ( <a href="https://www.ebi.ac.uk/chembl/target/inspect/CHEMBL3602">https://www.ebi.ac.uk/chembl/target/inspect/CHEMBL3602</a> )             | Sigma opioid receptor                                      | Show NN            |
| 16   | CHEMBL339 ( <a href="https://www.ebi.ac.uk/chembl/target/inspect/CHEMBL339">https://www.ebi.ac.uk/chembl/target/inspect/CHEMBL339</a> )                | Dopamine D2 receptor                                       | Show NN            |
| 17   | CHEMBL224 ( <a href="https://www.ebi.ac.uk/chembl/target/inspect/CHEMBL224">https://www.ebi.ac.uk/chembl/target/inspect/CHEMBL224</a> )                | Serotonin 2a (5-HT2a) receptor                             | Show NN            |

|    |                                                                                                                                         |                       |         |
|----|-----------------------------------------------------------------------------------------------------------------------------------------|-----------------------|---------|
| 18 | CHEMBL217 ( <a href="https://www.ebi.ac.uk/chembl/target/inspect/CHEMBL217">https://www.ebi.ac.uk/chembl/target/inspect/CHEMBL217</a> ) | Dopamine D2 receptor  | Show NN |
| 19 | CHEMBL205 ( <a href="https://www.ebi.ac.uk/chembl/target/inspect/CHEMBL205">https://www.ebi.ac.uk/chembl/target/inspect/CHEMBL205</a> ) | Carbonic anhydrase II | Show NN |
| 20 | CHEMBL240 ( <a href="https://www.ebi.ac.uk/chembl/target/inspect/CHEMBL240">https://www.ebi.ac.uk/chembl/target/inspect/CHEMBL240</a> ) | HERG                  | Show NN |
