# Supplementary material for: Accelerating Drug Discovery by Early Protein Drug Target Prediction Based on a Multi-Fingerprint Similarity Search
Source: MDPI journal article supplement (doi:10.3390/molecules24122233), 2019-06-14
Supplement: s1 [file s1]

## MuSSEL Prediction k<sub>i</sub>:

1 rank

Dopamine D2 receptor : Rattus norvegicus

score: 4.894 on ChEMBL339 based on 6 fingerprints

| Fingerprint type | Ligand        | Tanimoto | Similarity | activity  | Valid fg |
|------------------|---------------|----------|------------|-----------|----------|
| FeatMFP1         | ChEMBL1096620 |          | 0.666667   | 1800.000  |          |
| MFP1             | ChEMBL337149  |          | 0.687500   | 0.035     | *        |
| RDKit7           | ChEMBL337149  |          | 0.890785   | 0.035     | *        |
| Pattern          | ChEMBL444149  |          | 0.604149   | 17158.000 |          |
| AP_bits          | ChEMBL313744  |          | 0.427068   | 1.400     |          |
| TT_bits          | ChEMBL337149  |          | 0.457746   | 0.035     |          |
| FP2              | ChEMBL337149  |          | 0.774194   | 0.035     | *        |
| hybridization    | ChEMBL337149  |          | 0.763975   | 0.035     | *        |
| substructure     | ChEMBL134400  |          | 0.869565   | 0.023     | *        |
| graph            | ChEMBL134400  |          | 0.785714   | 0.023     |          |
| pubchem          | ChEMBL137309  |          | 0.818713   | 0.043     |          |
| cdk_maccs        | ChEMBL335606  |          | 0.907895   | 0.087     | *        |
| klekota_roth     | ChEMBL135917  |          | 0.641379   | 0.029     |          |

\*\*\* ki ACTIVITY \*\*\* value prediction

based on 6 locally validated fgps ---> 0.043

["RDKit7", "substructure", "MFP1", "FP2", "cdk\_maccs", "hybridization"]

2 rank

Dopamine D2 receptor : Homo sapiens

score: 4.739 on ChEMBL217 based on 6 fingerprints

| Fingerprint type | Ligand        | Tanimoto | Similarity | activity | Valid fg |
|------------------|---------------|----------|------------|----------|----------|
| FeatMFP1         | ChEMBL2165130 |          | 0.676471   | 235.000  |          |
| MFP1             | ChEMBL267932  |          | 0.645833   | 0.133    | *        |
| RDKit7           | ChEMBL267932  |          | 0.797782   | 0.133    | *        |
| Pattern          | ChEMBL3265044 |          | 0.863111   | 12.960   | *        |
| AP_bits          | ChEMBL3265048 |          | 0.688824   | 23.780   | *        |
| TT_bits          | ChEMBL92649   |          | 0.423313   | 0.660    |          |
| FP2              | ChEMBL267932  |          | 0.690323   | 0.133    |          |
| hybridization    | ChEMBL92649   |          | 0.683849   | 0.660    |          |
| substructure     | ChEMBL267930  |          | 0.869565   | 0.060    | *        |
| graph            | ChEMBL267932  |          | 0.727273   | 0.133    |          |
| pubchem          | ChEMBL267932  |          | 0.795322   | 0.133    |          |
| cdk_maccs        | ChEMBL320173  |          | 0.873418   | 3.100    | *        |
| klekota_roth     | ChEMBL267930  |          | 0.612676   | 0.060    |          |

\*\*\* ki ACTIVITY \*\*\* value prediction

based on 6 locally validated fgps ---> 7.279

["substructure", "Pattern", "MFP1", "AP\_bits", "RDKit7", "cdk\_maccs"]

3 rank

Dopamine D3 receptor : Homo sapiens

score: 3.788 on ChEMBL234 based on 5 fingerprints

| Fingerprint type | Ligand        | Tanimoto | Similarity | activity | Valid fg |
|------------------|---------------|----------|------------|----------|----------|
| FeatMFP1         | ChEMBL1112    |          | 0.636364   | 1.000    |          |
| MFP1             | ChEMBL267932  |          | 0.645833   | 0.265    | *        |
| RDKit7           | ChEMBL267932  |          | 0.797782   | 0.265    | *        |
| Pattern          | ChEMBL1909065 |          | 0.723330   | 9.336    |          |
| AP_bits          | ChEMBL1916550 |          | 0.617234   | 12.000   | *        |
| TT_bits          | ChEMBL267932  |          | 0.365517   | 0.265    |          |
| FP2              | ChEMBL267932  |          | 0.690323   | 0.265    |          |
| hybridization    | ChEMBL1813589 |          | 0.598940   | 427.000  |          |
| substructure     | ChEMBL267930  |          | 0.869565   | 0.120    | *        |
| graph            | ChEMBL267932  |          | 0.727273   | 0.265    |          |
| pubchem          | ChEMBL267932  |          | 0.795322   | 0.265    |          |
| cdk_maccs        | ChEMBL267932  |          | 0.857143   | 0.265    | *        |
| klekota_roth     | ChEMBL267930  |          | 0.612676   | 0.120    |          |

\*\*\* ki ACTIVITY \*\*\* value prediction

based on 5 locally validated fgps ---> 1.593  
["AP\_bits", "RDKit7", "MFP1", "substructure", "cdk\_maccs"]

4 rank

Nociceptin receptor : Homo sapiens

score: 3.220 on ChEMBL2014 based on 4 fingerprints

| Fingerprint type | Ligand        | Tanimoto | Similarity | activity | Valid fg |
|------------------|---------------|----------|------------|----------|----------|
| FeatMFP1         | CHEMBL283432  |          | 0.666667   | 8.5      |          |
| MFP1             | CHEMBL2088036 |          | 0.509434   | 12.9     |          |
| RDKit7           | CHEMBL26483   |          | 0.774554   | 15.0     | *        |
| Pattern          | CHEMBL3810104 |          | 0.878706   | 38.0     | *        |
| AP_bits          | CHEMBL3808398 |          | 0.683515   | 27.0     | *        |
| TT_bits          | CHEMBL26483   |          | 0.375000   | 15.0     |          |
| FP2              | CHEMBL46516   |          | 0.635220   | 500.0    |          |
| hybridization    | CHEMBL26987   |          | 0.630237   | 7.2      |          |
| substructure     | CHEMBL26483   |          | 0.791667   | 15.0     |          |
| graph            | CHEMBL2088036 |          | 0.746835   | 12.9     |          |
| pubchem          | CHEMBL2088036 |          | 0.752809   | 12.9     |          |
| cdk_maccs        | CHEMBL516077  |          | 0.883117   | 19.5     | *        |
| klekota_roth     | CHEMBL2088036 |          | 0.629139   | 12.9     |          |

\*\*\* ki ACTIVITY \*\*\* value prediction

based on 4 locally validated fgps ---> 25.183

["Pattern", "RDKit7", "cdk\_maccs", "AP\_bits"]

5 rank

Mu opioid receptor : Homo sapiens

score: 3.220 on ChEMBL233 based on 4 fingerprints

| Fingerprint type | Ligand        | Tanimoto | Similarity | activity | Valid fg |
|------------------|---------------|----------|------------|----------|----------|
| FeatMFP1         | CHEMBL283432  |          | 0.666667   | 7.5      |          |
| MFP1             | CHEMBL516077  |          | 0.464286   | 683.0    |          |
| RDKit7           | CHEMBL26483   |          | 0.774554   | 61.0     | *        |
| Pattern          | CHEMBL3810104 |          | 0.878706   | 15.0     | *        |
| AP_bits          | CHEMBL3808398 |          | 0.683515   | 15.0     | *        |
| TT_bits          | CHEMBL26483   |          | 0.375000   | 61.0     |          |
| FP2              | CHEMBL26483   |          | 0.626374   | 61.0     |          |
| hybridization    | CHEMBL26987   |          | 0.630237   | 3.3      |          |
| substructure     | CHEMBL26483   |          | 0.791667   | 61.0     |          |
| graph            | CHEMBL511649  |          | 0.716129   | 14.0     |          |
| pubchem          | CHEMBL26483   |          | 0.735450   | 61.0     |          |
| cdk_maccs        | CHEMBL516077  |          | 0.883117   | 683.0    | *        |
| klekota_roth     | CHEMBL516077  |          | 0.596154   | 683.0    |          |

\*\*\* ki ACTIVITY \*\*\* value prediction

based on 4 locally validated fgps ---> 198.087

["Pattern", "RDKit7", "cdk\_maccs", "AP\_bits"]

6 rank

Kappa opioid receptor : Homo sapiens

score: 3.220 on ChEMBL237 based on 4 fingerprints

| Fingerprint type | Ligand        | Tanimoto | Similarity | activity | Valid fg |
|------------------|---------------|----------|------------|----------|----------|
| FeatMFP1         | CHEMBL283432  |          | 0.666667   | 17.5     |          |
| MFP1             | CHEMBL516077  |          | 0.464286   | 2274.0   |          |
| RDKit7           | CHEMBL26483   |          | 0.774554   | 28.8     | *        |
| Pattern          | CHEMBL3810104 |          | 0.878706   | 22.0     | *        |
| AP_bits          | CHEMBL3808398 |          | 0.683515   | 84.0     | *        |
| TT_bits          | CHEMBL26483   |          | 0.375000   | 28.8     |          |
| FP2              | CHEMBL26483   |          | 0.626374   | 28.8     |          |
| hybridization    | CHEMBL26987   |          | 0.630237   | 16.4     |          |
| substructure     | CHEMBL26483   |          | 0.791667   | 28.8     |          |
| graph            | CHEMBL511649  |          | 0.716129   | 56.0     |          |
| pubchem          | CHEMBL26483   |          | 0.735450   | 28.8     |          |

|              |              |          |        |   |
|--------------|--------------|----------|--------|---|
| cdk_maccs    | CHEMBL516077 | 0.883117 | 2274.0 | * |
| klekota_roth | CHEMBL516077 | 0.596154 | 2274.0 |   |

\*\*\* ki ACTIVITY \*\*\* value prediction  
based on 4 locally validated fgps ---> 550.986  
["Pattern", "RDKit7", "cdk\_maccs", "AP\_bits"]

7 rank

Delta opioid receptor : Homo sapiens  
score: 3.206 on ChEMBL236 based on 4 fingerprints

| Fingerprint type | Ligand        | Tanimoto Similarity | activity | Valid fg |
|------------------|---------------|---------------------|----------|----------|
| FeatMFP1         | CHEMBL283432  | 0.666667            | 240.0    |          |
| MFP1             | CHEMBL391631  | 0.444444            | 320.0    |          |
| RDKit7           | CHEMBL26483   | 0.774554            | 510.0    | *        |
| Pattern          | CHEMBL3752798 | 0.899816            | 0.6      | *        |
| AP_bits          | CHEMBL3616885 | 0.685634            | 7.0      | *        |
| TT_bits          | CHEMBL26483   | 0.375000            | 510.0    |          |
| FP2              | CHEMBL26483   | 0.626374            | 510.0    |          |
| hybridization    | CHEMBL26987   | 0.630237            | 285.0    |          |
| substructure     | CHEMBL26483   | 0.791667            | 510.0    |          |
| graph            | CHEMBL511649  | 0.716129            | 795.0    |          |
| pubchem          | CHEMBL26483   | 0.735450            | 510.0    |          |
| cdk_maccs        | CHEMBL516024  | 0.846154            | 28990.0  | *        |
| klekota_roth     | CHEMBL516024  | 0.529032            | 28990.0  |          |

\*\*\* ki ACTIVITY \*\*\* value prediction  
based on 4 locally validated fgps ---> 7390.652  
["Pattern", "RDKit7", "cdk\_maccs", "AP\_bits"]

# SwissTargetPrediction report:

## Reference:

Gfeller D., Michielin O. & Zoete V.  
 Shaping the interaction landscape of  
 bioactive molecules, *Bioinformatics*  
 (2013) 29:3073-3079.

## Query Molecule

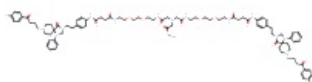

## Frequency of Target Class

| Target                                                 | Uniprot ID | Gene code | ChEMBL ID  | Probability            | # sim. cmpds (3D / 2D) | Target Class      |
|--------------------------------------------------------|------------|-----------|------------|------------------------|------------------------|-------------------|
| D(2) dopamine receptor ( <i>by homology</i> )          | P14416     | DRD2      | CHEMBL217  | <div><div></div></div> | 0 / 81                 | Membrane receptor |
| D(3) dopamine receptor ( <i>by homology</i> )          | P35462     | DRD3      | CHEMBL234  | <div><div></div></div> | 0 / 38                 | Membrane receptor |
| D(1A) dopamine receptor                                | P21728     | DRD1      | CHEMBL2056 | <div><div></div></div> | 0 / 4                  | Membrane receptor |
| D(4) dopamine receptor                                 | P21917     | DRD4      | CHEMBL219  | <div><div></div></div> | 0 / 26                 | Membrane receptor |
| Alpha-1D adrenergic receptor ( <i>by homology</i> )    | P25100     | ADRA1D    | CHEMBL223  | <div><div></div></div> | 0 / 14                 | Membrane receptor |
| 5-hydroxytryptamine receptor 2A                        | P28223     | HTR2A     | CHEMBL224  | <div><div></div></div> | 0 / 40                 | Membrane receptor |
| 5-hydroxytryptamine receptor 2C                        | P28335     | HTR2C     | CHEMBL225  | <div><div></div></div> | 0 / 16                 | Membrane receptor |
| 5-hydroxytryptamine receptor 7                         | P34969     | HTR7      | CHEMBL3155 | <div><div></div></div> | 0 / 1                  | Membrane receptor |
| Alpha-1A adrenergic receptor                           | P35348     | ADRA1A    | CHEMBL229  | <div><div></div></div> | 0 / 22                 | Membrane receptor |
| Alpha-1B adrenergic receptor ( <i>by homology</i> )    | P35368     | ADRA1B    | CHEMBL232  | <div><div></div></div> | 0 / 14                 | Membrane receptor |
| 5-hydroxytryptamine receptor 2B ( <i>by homology</i> ) | P41595     | HTR2B     | CHEMBL1833 | <div><div></div></div> | 0 / 16                 | Membrane receptor |
| 5-hydroxytryptamine receptor 6                         | P50406     | HTR6      | CHEMBL3371 | <div><div></div></div> | 0 / 3                  | Membrane receptor |
| 5-hydroxytryptamine receptor 1D ( <i>by homology</i> ) | P28221     | HTR1D     | CHEMBL1983 | <div><div></div></div> | 0 / 1                  | Membrane receptor |
| 5-hydroxytryptamine receptor 1B ( <i>by homology</i> ) | P28222     | HTR1B     | CHEMBL1898 | <div><div></div></div> | 0 / 26                 | Membrane receptor |
| D(1B) dopamine receptor ( <i>by homology</i> )         | P21918     | DRD5      | CHEMBL1850 | <div><div></div></div> | 0 / 3                  | Membrane receptor |

# Polypharmacology Browser 2 Prediction:

Targets predicted using NN(ECfp4) + NB(ECfp4).

Save Table

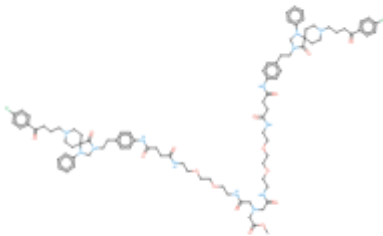

Query molecule

Target class overview

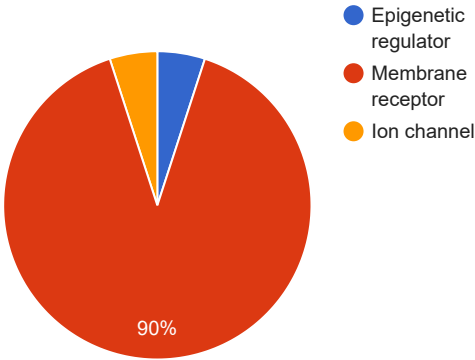

| Rank | ChEMBL ID                                                                                                                                  | Common name                              | Nearest neighbours |
|------|--------------------------------------------------------------------------------------------------------------------------------------------|------------------------------------------|--------------------|
| 1    | CHEMBL217 ( <a href="https://www.ebi.ac.uk/chembl/target/inspect/CHEMBL217">https://www.ebi.ac.uk/chembl/target/inspect/CHEMBL217</a> )    | Dopamine D2 receptor                     | Show NN            |
| 2    | CHEMBL339 ( <a href="https://www.ebi.ac.uk/chembl/target/inspect/CHEMBL339">https://www.ebi.ac.uk/chembl/target/inspect/CHEMBL339</a> )    | Dopamine D2 receptor                     | Show NN            |
| 3    | CHEMBL234 ( <a href="https://www.ebi.ac.uk/chembl/target/inspect/CHEMBL234">https://www.ebi.ac.uk/chembl/target/inspect/CHEMBL234</a> )    | Dopamine D3 receptor                     | Show NN            |
| 4    | CHEMBL219 ( <a href="https://www.ebi.ac.uk/chembl/target/inspect/CHEMBL219">https://www.ebi.ac.uk/chembl/target/inspect/CHEMBL219</a> )    | Dopamine D4 receptor                     | Show NN            |
| 5    | CHEMBL273 ( <a href="https://www.ebi.ac.uk/chembl/target/inspect/CHEMBL273">https://www.ebi.ac.uk/chembl/target/inspect/CHEMBL273</a> )    | Serotonin 1a (5-HT1a) receptor           | Show NN            |
| 6    | CHEMBL233 ( <a href="https://www.ebi.ac.uk/chembl/target/inspect/CHEMBL233">https://www.ebi.ac.uk/chembl/target/inspect/CHEMBL233</a> )    | Mu opioid receptor                       | Show NN            |
| 7    | CHEMBL237 ( <a href="https://www.ebi.ac.uk/chembl/target/inspect/CHEMBL237">https://www.ebi.ac.uk/chembl/target/inspect/CHEMBL237</a> )    | Kappa opioid receptor                    | Show NN            |
| 8    | CHEMBL344 ( <a href="https://www.ebi.ac.uk/chembl/target/inspect/CHEMBL344">https://www.ebi.ac.uk/chembl/target/inspect/CHEMBL344</a> )    | Melanin-concentrating hormone receptor 1 | Show NN            |
| 9    | CHEMBL214 ( <a href="https://www.ebi.ac.uk/chembl/target/inspect/CHEMBL214">https://www.ebi.ac.uk/chembl/target/inspect/CHEMBL214</a> )    | Serotonin 1a (5-HT1a) receptor           | Show NN            |
| 10   | CHEMBL240 ( <a href="https://www.ebi.ac.uk/chembl/target/inspect/CHEMBL240">https://www.ebi.ac.uk/chembl/target/inspect/CHEMBL240</a> )    | HERG                                     | Show NN            |
| 11   | CHEMBL236 ( <a href="https://www.ebi.ac.uk/chembl/target/inspect/CHEMBL236">https://www.ebi.ac.uk/chembl/target/inspect/CHEMBL236</a> )    | Delta opioid receptor                    | Show NN            |
| 12   | CHEMBL324 ( <a href="https://www.ebi.ac.uk/chembl/target/inspect/CHEMBL324">https://www.ebi.ac.uk/chembl/target/inspect/CHEMBL324</a> )    | Serotonin 2c (5-HT2c) receptor           | Show NN            |
| 13   | CHEMBL322 ( <a href="https://www.ebi.ac.uk/chembl/target/inspect/CHEMBL322">https://www.ebi.ac.uk/chembl/target/inspect/CHEMBL322</a> )    | Serotonin 2a (5-HT2a) receptor           | Show NN            |
| 14   | CHEMBL264 ( <a href="https://www.ebi.ac.uk/chembl/target/inspect/CHEMBL264">https://www.ebi.ac.uk/chembl/target/inspect/CHEMBL264</a> )    | Histamine H3 receptor                    | Show NN            |
| 15   | CHEMBL287 ( <a href="https://www.ebi.ac.uk/chembl/target/inspect/CHEMBL287">https://www.ebi.ac.uk/chembl/target/inspect/CHEMBL287</a> )    | Sigma opioid receptor                    | Show NN            |
| 16   | CHEMBL2056 ( <a href="https://www.ebi.ac.uk/chembl/target/inspect/CHEMBL2056">https://www.ebi.ac.uk/chembl/target/inspect/CHEMBL2056</a> ) | Dopamine D1 receptor                     | Show NN            |
| 17   | CHEMBL224 ( <a href="https://www.ebi.ac.uk/chembl/target/inspect/CHEMBL224">https://www.ebi.ac.uk/chembl/target/inspect/CHEMBL224</a> )    | Serotonin 2a (5-HT2a) receptor           | Show NN            |
| 18   | CHEMBL231 ( <a href="https://www.ebi.ac.uk/chembl/target/inspect/CHEMBL231">https://www.ebi.ac.uk/chembl/target/inspect/CHEMBL231</a> )    | Histamine H1 receptor                    | Show NN            |

|    |                                                                                                                                            |                       |         |
|----|--------------------------------------------------------------------------------------------------------------------------------------------|-----------------------|---------|
| 19 | CHEMBL2014 ( <a href="https://www.ebi.ac.uk/chembl/target/inspect/CHEMBL2014">https://www.ebi.ac.uk/chembl/target/inspect/CHEMBL2014</a> ) | Nociceptin receptor   | Show NN |
| 20 | CHEMBL325 ( <a href="https://www.ebi.ac.uk/chembl/target/inspect/CHEMBL325">https://www.ebi.ac.uk/chembl/target/inspect/CHEMBL325</a> )    | Histone deacetylase 1 | Show NN |
