# Supplementary material for: Accelerating Drug Discovery by Early Protein Drug Target Prediction Based on a Multi-Fingerprint Similarity Search
Source: MDPI journal article supplement (doi:10.3390/molecules24122233), 2019-06-14
Supplement: s1 [file s1]

## MuSSEL Prediction k<sub>i</sub>:

1 rank

Homeodomain-interacting protein kinase 4 : Homo sapiens

score: 12.707 on ChEMBL1075167 based on 13 fingerprints

| Fingerprint type | Ligand        | Tanimoto | Similarity | activity | Valid fg |
|------------------|---------------|----------|------------|----------|----------|
| FeatMFP1         | ChEMBL1975121 |          | 1.000000   | 794.33   | *        |
| MFP1             | ChEMBL1975121 |          | 1.000000   | 794.33   | *        |
| RDKit7           | ChEMBL1975121 |          | 1.000000   | 794.33   | *        |
| Pattern          | ChEMBL1975121 |          | 1.000000   | 794.33   | *        |
| AP_bits          | ChEMBL1975121 |          | 1.000000   | 794.33   | *        |
| TT_bits          | ChEMBL1975121 |          | 1.000000   | 794.33   | *        |
| FP2              | ChEMBL1975121 |          | 1.000000   | 794.33   | *        |
| hybridization    | ChEMBL1975121 |          | 0.877451   | 794.33   | *        |
| substructure     | ChEMBL1969049 |          | 1.000000   | 398.11   | *        |
| graph            | ChEMBL1969049 |          | 0.829268   | 398.11   | *        |
| pubchem          | ChEMBL1970217 |          | 1.000000   | 1258.93  | *        |
| cdk_maccs        | ChEMBL1975121 |          | 1.000000   | 794.33   | *        |
| klekota_roth     | ChEMBL1975121 |          | 1.000000   | 794.33   | *        |

\*\*\* ki ACTIVITY \*\*\* value prediction

based on 13 locally validated fgps ---> 1176.319

["TT\_bits", "substructure", "cdk\_maccs", "Pattern", "FP2", "MFP1", "klekota\_roth", "pubchem", "graph", "AP\_bits", "FeatMFP1", "RDKit7", "hybridization"]

2 rank

Serine/threonine-protein kinase AKT2 : Homo sapiens

score: 12.707 on ChEMBL2431 based on 13 fingerprints

| Fingerprint type | Ligand        | Tanimoto | Similarity | activity | Valid fg |
|------------------|---------------|----------|------------|----------|----------|
| FeatMFP1         | ChEMBL1975121 |          | 1.000000   | 2511.89  | *        |
| MFP1             | ChEMBL1975121 |          | 1.000000   | 2511.89  | *        |
| RDKit7           | ChEMBL1975121 |          | 1.000000   | 2511.89  | *        |
| Pattern          | ChEMBL1975121 |          | 1.000000   | 2511.89  | *        |
| AP_bits          | ChEMBL1975121 |          | 1.000000   | 2511.89  | *        |
| TT_bits          | ChEMBL1975121 |          | 1.000000   | 2511.89  | *        |
| FP2              | ChEMBL1975121 |          | 1.000000   | 2511.89  | *        |
| hybridization    | ChEMBL1975121 |          | 0.877451   | 2511.89  | *        |
| substructure     | ChEMBL1969049 |          | 1.000000   | 3981.07  | *        |
| graph            | ChEMBL1969049 |          | 0.829268   | 3981.07  | *        |
| pubchem          | ChEMBL1970217 |          | 1.000000   | 1258.93  | *        |
| cdk_maccs        | ChEMBL1975121 |          | 1.000000   | 2511.89  | *        |
| klekota_roth     | ChEMBL1975121 |          | 1.000000   | 2511.89  | *        |

\*\*\* ki ACTIVITY \*\*\* value prediction

based on 13 locally validated fgps ---> 2572.927

["TT\_bits", "substructure", "cdk\_maccs", "Pattern", "FP2", "MFP1", "klekota\_roth", "pubchem", "graph", "AP\_bits", "FeatMFP1", "RDKit7", "hybridization"]

3 rank

Glycogen synthase kinase-3 beta : Homo sapiens

score: 12.707 on ChEMBL262 based on 13 fingerprints

| Fingerprint type | Ligand        | Tanimoto | Similarity | activity | Valid fg |
|------------------|---------------|----------|------------|----------|----------|
| FeatMFP1         | ChEMBL1975121 |          | 1.000000   | 630.96   | *        |
| MFP1             | ChEMBL1975121 |          | 1.000000   | 630.96   | *        |
| RDKit7           | ChEMBL1975121 |          | 1.000000   | 630.96   | *        |
| Pattern          | ChEMBL1975121 |          | 1.000000   | 630.96   | *        |
| AP_bits          | ChEMBL1975121 |          | 1.000000   | 630.96   | *        |
| TT_bits          | ChEMBL1975121 |          | 1.000000   | 630.96   | *        |
| FP2              | ChEMBL1975121 |          | 1.000000   | 630.96   | *        |
| hybridization    | ChEMBL1975121 |          | 0.877451   | 630.96   | *        |
| substructure     | ChEMBL1969049 |          | 1.000000   | 100.00   | *        |
| graph            | ChEMBL1969049 |          | 0.829268   | 100.00   | *        |

```

pubchem CHEMBL1970217 1.000000 251.19 *
cdk_maccs CHEMBL1975121 1.000000 630.96 *
klekota_roth CHEMBL1975121 1.000000 630.96 *
*** ki ACTIVITY *** value prediction
based on 13 locally validated fgps ---> 581.682
["TT_bits", "substructure", "cdk_maccs", "Pattern", "FP2", "MFP1",
"klekota_roth", "pubchem", "graph", "AP_bits", "FeatMFP1", "RDKit7",
"hybridization"]

4 rank
Glycogen synthase kinase-3 alpha : Homo sapiens
score: 12.707 on CHEMBL2850 based on 13 fingerprints
Fingerprint type Ligand Tanimoto Similarity activity Valid fg
FeatMFP1 CHEMBL1975121 1.000000 630.96 *
MFP1 CHEMBL1975121 1.000000 630.96 *
RDKit7 CHEMBL1975121 1.000000 630.96 *
Pattern CHEMBL1975121 1.000000 630.96 *
AP_bits CHEMBL1975121 1.000000 630.96 *
TT_bits CHEMBL1975121 1.000000 630.96 *
FP2 CHEMBL1975121 1.000000 630.96 *
hybridization CHEMBL1975121 0.877451 630.96 *
substructure CHEMBL1969049 1.000000 251.19 *
graph CHEMBL1969049 0.829268 251.19 *
pubchem CHEMBL1970217 1.000000 501.19 *
cdk_maccs CHEMBL1975121 1.000000 630.96 *
klekota_roth CHEMBL1975121 1.000000 630.96 *
*** ki ACTIVITY *** value prediction
based on 13 locally validated fgps ---> 786.432
["TT_bits", "substructure", "cdk_maccs", "Pattern", "FP2", "MFP1",
"klekota_roth", "pubchem", "graph", "AP_bits", "FeatMFP1", "RDKit7",
"hybridization"]

5 rank
cGMP-dependent protein kinase 2 : Homo sapiens
score: 12.707 on CHEMBL2896 based on 13 fingerprints
Fingerprint type Ligand Tanimoto Similarity activity Valid fg
FeatMFP1 CHEMBL1975121 1.000000 15.85 *
MFP1 CHEMBL1975121 1.000000 15.85 *
RDKit7 CHEMBL1975121 1.000000 15.85 *
Pattern CHEMBL1975121 1.000000 15.85 *
AP_bits CHEMBL1975121 1.000000 15.85 *
TT_bits CHEMBL1975121 1.000000 15.85 *
FP2 CHEMBL1975121 1.000000 15.85 *
hybridization CHEMBL1975121 0.877451 15.85 *
substructure CHEMBL1969049 1.000000 79.43 *
graph CHEMBL1969049 0.829268 79.43 *
pubchem CHEMBL1970217 1.000000 50.12 *
cdk_maccs CHEMBL1975121 1.000000 15.85 *
klekota_roth CHEMBL1975121 1.000000 15.85 *
*** ki ACTIVITY *** value prediction
based on 13 locally validated fgps ---> 48.815
["TT_bits", "substructure", "cdk_maccs", "Pattern", "FP2", "MFP1",
"klekota_roth", "pubchem", "graph", "AP_bits", "FeatMFP1", "RDKit7",
"hybridization"]

6 rank
Protein kinase C gamma : Homo sapiens
score: 12.707 on CHEMBL2938 based on 13 fingerprints
Fingerprint type Ligand Tanimoto Similarity activity Valid fg
FeatMFP1 CHEMBL1975121 1.000000 1000.00 *
```

|               |               |          |         |   |
|---------------|---------------|----------|---------|---|
| MFP1          | CHEMBL1975121 | 1.000000 | 1000.00 | * |
| RDKit7        | CHEMBL1975121 | 1.000000 | 1000.00 | * |
| Pattern       | CHEMBL1975121 | 1.000000 | 1000.00 | * |
| AP_bits       | CHEMBL1975121 | 1.000000 | 1000.00 | * |
| TT_bits       | CHEMBL1975121 | 1.000000 | 1000.00 | * |
| FP2           | CHEMBL1975121 | 1.000000 | 1000.00 | * |
| hybridization | CHEMBL1975121 | 0.877451 | 1000.00 | * |
| substructure  | CHEMBL1970217 | 1.000000 | 794.33  | * |
| graph         | CHEMBL1970217 | 0.829268 | 794.33  | * |
| pubchem       | CHEMBL1970217 | 1.000000 | 794.33  | * |
| cdk_maccs     | CHEMBL1975121 | 1.000000 | 1000.00 | * |
| klekota_roth  | CHEMBL1975121 | 1.000000 | 1000.00 | * |

\*\*\* ki ACTIVITY \*\*\* value prediction

based on 13 locally validated fgps ---> 1173.481

["TT\_bits", "substructure", "cdk\_maccs", "Pattern", "FP2", "MFP1", "klekota\_roth", "pubchem", "graph", "AP\_bits", "FeatMFP1", "RDKit7", "hybridization"]

7 rank

Rho-associated protein kinase 2 : Homo sapiens

score: 12.707 on ChEMBL2973 based on 13 fingerprints

| Fingerprint type | Ligand        | Tanimoto | Similarity | activity | Valid fg |
|------------------|---------------|----------|------------|----------|----------|
| FeatMFP1         | CHEMBL1975121 | 1.000000 | 199.53     | *        |          |
| MFP1             | CHEMBL1975121 | 1.000000 | 199.53     | *        |          |
| RDKit7           | CHEMBL1975121 | 1.000000 | 199.53     | *        |          |
| Pattern          | CHEMBL1975121 | 1.000000 | 199.53     | *        |          |
| AP_bits          | CHEMBL1975121 | 1.000000 | 199.53     | *        |          |
| TT_bits          | CHEMBL1975121 | 1.000000 | 199.53     | *        |          |
| FP2              | CHEMBL1975121 | 1.000000 | 199.53     | *        |          |
| hybridization    | CHEMBL1975121 | 0.877451 | 199.53     | *        |          |
| substructure     | CHEMBL1975121 | 1.000000 | 199.53     | *        |          |
| graph            | CHEMBL1975121 | 0.829268 | 199.53     | *        |          |
| pubchem          | CHEMBL1975121 | 1.000000 | 199.53     | *        |          |
| cdk_maccs        | CHEMBL1975121 | 1.000000 | 199.53     | *        |          |
| klekota_roth     | CHEMBL1975121 | 1.000000 | 199.53     | *        |          |

\*\*\* ki ACTIVITY \*\*\* value prediction

based on 13 locally validated fgps ---> 122.606

["TT\_bits", "substructure", "cdk\_maccs", "Pattern", "FP2", "MFP1", "klekota\_roth", "pubchem", "graph", "AP\_bits", "FeatMFP1", "RDKit7", "hybridization"]

8 rank

Protein kinase C delta : Homo sapiens

score: 12.707 on ChEMBL2996 based on 13 fingerprints

| Fingerprint type | Ligand        | Tanimoto | Similarity | activity | Valid fg |
|------------------|---------------|----------|------------|----------|----------|
| FeatMFP1         | CHEMBL1975121 | 1.000000 | 63.10      | *        |          |
| MFP1             | CHEMBL1975121 | 1.000000 | 63.10      | *        |          |
| RDKit7           | CHEMBL1975121 | 1.000000 | 63.10      | *        |          |
| Pattern          | CHEMBL1975121 | 1.000000 | 63.10      | *        |          |
| AP_bits          | CHEMBL1975121 | 1.000000 | 63.10      | *        |          |
| TT_bits          | CHEMBL1975121 | 1.000000 | 63.10      | *        |          |
| FP2              | CHEMBL1975121 | 1.000000 | 63.10      | *        |          |
| hybridization    | CHEMBL1975121 | 0.877451 | 63.10      | *        |          |
| substructure     | CHEMBL1969049 | 1.000000 | 125.89     | *        |          |
| graph            | CHEMBL1969049 | 0.829268 | 125.89     | *        |          |
| pubchem          | CHEMBL1970217 | 1.000000 | 39.81      | *        |          |
| cdk_maccs        | CHEMBL1975121 | 1.000000 | 63.10      | *        |          |
| klekota_roth     | CHEMBL1975121 | 1.000000 | 63.10      | *        |          |

\*\*\* ki ACTIVITY \*\*\* value prediction

based on 13 locally validated fgps ---> 159.905

["TT\_bits", "substructure", "cdk\_maccs", "Pattern", "FP2", "MFP1",  
 "klekota\_roth", "pubchem", "graph", "AP\_bits", "FeatMFP1", "RDKit7",  
 "hybridization"]

9 rank

Cyclin-dependent kinase 2 : Homo sapiens

score: 12.707 on ChEMBL301 based on 13 fingerprints

| Fingerprint type | Ligand        | Tanimoto | Similarity | activity | Valid fg |
|------------------|---------------|----------|------------|----------|----------|
| FeatMFP1         | ChEMBL1975121 |          | 1.000000   | 2511.89  | *        |
| MFP1             | ChEMBL1975121 |          | 1.000000   | 2511.89  | *        |
| RDKit7           | ChEMBL1975121 |          | 1.000000   | 2511.89  | *        |
| Pattern          | ChEMBL1975121 |          | 1.000000   | 2511.89  | *        |
| AP_bits          | ChEMBL1975121 |          | 1.000000   | 2511.89  | *        |
| TT_bits          | ChEMBL1975121 |          | 1.000000   | 2511.89  | *        |
| FP2              | ChEMBL1975121 |          | 1.000000   | 2511.89  | *        |
| hybridization    | ChEMBL1975121 |          | 0.877451   | 2511.89  | *        |
| substructure     | ChEMBL1969049 |          | 1.000000   | 3981.07  | *        |
| graph            | ChEMBL1969049 |          | 0.829268   | 3981.07  | *        |
| pubchem          | ChEMBL1970217 |          | 1.000000   | 1995.26  | *        |
| cdk_maccs        | ChEMBL1975121 |          | 1.000000   | 2511.89  | *        |
| klekota_roth     | ChEMBL1975121 |          | 1.000000   | 2511.89  | *        |

\*\*\* ki ACTIVITY \*\*\* value prediction

based on 13 locally validated fgps ---> 2671.123

["TT\_bits", "substructure", "cdk\_maccs", "Pattern", "FP2", "MFP1",  
 "klekota\_roth", "pubchem", "graph", "AP\_bits", "FeatMFP1", "RDKit7",  
 "hybridization"]

10 rank

Protein kinase N2 : Homo sapiens

score: 12.707 on ChEMBL3032 based on 13 fingerprints

| Fingerprint type | Ligand        | Tanimoto | Similarity | activity | Valid fg |
|------------------|---------------|----------|------------|----------|----------|
| FeatMFP1         | ChEMBL1975121 |          | 1.000000   | 79.43    | *        |
| MFP1             | ChEMBL1975121 |          | 1.000000   | 79.43    | *        |
| RDKit7           | ChEMBL1975121 |          | 1.000000   | 79.43    | *        |
| Pattern          | ChEMBL1975121 |          | 1.000000   | 79.43    | *        |
| AP_bits          | ChEMBL1975121 |          | 1.000000   | 79.43    | *        |
| TT_bits          | ChEMBL1975121 |          | 1.000000   | 79.43    | *        |
| FP2              | ChEMBL1975121 |          | 1.000000   | 79.43    | *        |
| hybridization    | ChEMBL1975121 |          | 0.877451   | 79.43    | *        |
| substructure     | ChEMBL1969049 |          | 1.000000   | 125.89   | *        |
| graph            | ChEMBL1969049 |          | 0.829268   | 125.89   | *        |
| pubchem          | ChEMBL1970217 |          | 1.000000   | 79.43    | *        |
| cdk_maccs        | ChEMBL1975121 |          | 1.000000   | 79.43    | *        |
| klekota_roth     | ChEMBL1975121 |          | 1.000000   | 79.43    | *        |

\*\*\* ki ACTIVITY \*\*\* value prediction

based on 13 locally validated fgps ---> 280.648

["TT\_bits", "substructure", "cdk\_maccs", "Pattern", "FP2", "MFP1",  
 "klekota\_roth", "pubchem", "graph", "AP\_bits", "FeatMFP1", "RDKit7",  
 "hybridization"]

11 rank

Cyclin-dependent kinase 1 : Homo sapiens

score: 12.707 on ChEMBL308 based on 13 fingerprints

| Fingerprint type | Ligand        | Tanimoto | Similarity | activity | Valid fg |
|------------------|---------------|----------|------------|----------|----------|
| FeatMFP1         | ChEMBL1975121 |          | 1.000000   | 3162.28  | *        |
| MFP1             | ChEMBL1975121 |          | 1.000000   | 3162.28  | *        |
| RDKit7           | ChEMBL1975121 |          | 1.000000   | 3162.28  | *        |
| Pattern          | ChEMBL1975121 |          | 1.000000   | 3162.28  | *        |
| AP_bits          | ChEMBL1975121 |          | 1.000000   | 3162.28  | *        |
| TT_bits          | ChEMBL1975121 |          | 1.000000   | 3162.28  | *        |

|               |               |          |         |   |
|---------------|---------------|----------|---------|---|
| FP2           | CHEMBL1975121 | 1.000000 | 3162.28 | * |
| hybridization | CHEMBL1975121 | 0.877451 | 3162.28 | * |
| substructure  | CHEMBL1970217 | 1.000000 | 1584.89 | * |
| graph         | CHEMBL1970217 | 0.829268 | 1584.89 | * |
| pubchem       | CHEMBL1970217 | 1.000000 | 1584.89 | * |
| cdk_maccs     | CHEMBL1975121 | 1.000000 | 3162.28 | * |
| klekota_roth  | CHEMBL1975121 | 1.000000 | 3162.28 | * |

\*\*\* ki ACTIVITY \*\*\* value prediction  
based on 13 locally validated fgps ---> 3099.333  
["TT\_bits", "substructure", "cdk\_maccs", "Pattern", "FP2", "MFP1",  
"klekota\_roth", "pubchem", "graph", "AP\_bits", "FeatMFP1", "RDKit7",  
"hybridization"]

12 rank  
Rho-associated protein kinase 1 : Homo sapiens  
score: 12.707 on ChEMBL3231 based on 13 fingerprints

| Fingerprint type | Ligand        | Tanimoto | Similarity | activity | Valid fg |
|------------------|---------------|----------|------------|----------|----------|
| FeatMFP1         | CHEMBL1975121 | 1.000000 | 2.512      | *        |          |
| MFP1             | CHEMBL1975121 | 1.000000 | 2.512      | *        |          |
| RDKit7           | CHEMBL1975121 | 1.000000 | 2.512      | *        |          |
| Pattern          | CHEMBL1975121 | 1.000000 | 2.512      | *        |          |
| AP_bits          | CHEMBL1975121 | 1.000000 | 2.512      | *        |          |
| TT_bits          | CHEMBL1975121 | 1.000000 | 2.512      | *        |          |
| FP2              | CHEMBL1975121 | 1.000000 | 2.512      | *        |          |
| hybridization    | CHEMBL1975121 | 0.877451 | 2.512      | *        |          |
| substructure     | CHEMBL1969049 | 1.000000 | 25.120     | *        |          |
| graph            | CHEMBL1969049 | 0.829268 | 25.120     | *        |          |
| pubchem          | CHEMBL1970217 | 1.000000 | 19.950     | *        |          |
| cdk_maccs        | CHEMBL1975121 | 1.000000 | 2.512      | *        |          |
| klekota_roth     | CHEMBL1975121 | 1.000000 | 2.512      | *        |          |

\*\*\* ki ACTIVITY \*\*\* value prediction  
based on 13 locally validated fgps ---> 14.191  
["TT\_bits", "substructure", "cdk\_maccs", "Pattern", "FP2", "MFP1",  
"klekota\_roth", "pubchem", "graph", "AP\_bits", "FeatMFP1", "RDKit7",  
"hybridization"]

13 rank  
Interleukin-1 receptor-associated kinase 1 : Homo sapiens  
score: 12.707 on ChEMBL3357 based on 13 fingerprints

| Fingerprint type | Ligand        | Tanimoto | Similarity | activity | Valid fg |
|------------------|---------------|----------|------------|----------|----------|
| FeatMFP1         | CHEMBL1975121 | 1.000000 | 1000.00    | *        |          |
| MFP1             | CHEMBL1975121 | 1.000000 | 1000.00    | *        |          |
| RDKit7           | CHEMBL1975121 | 1.000000 | 1000.00    | *        |          |
| Pattern          | CHEMBL1975121 | 1.000000 | 1000.00    | *        |          |
| AP_bits          | CHEMBL1975121 | 1.000000 | 1000.00    | *        |          |
| TT_bits          | CHEMBL1975121 | 1.000000 | 1000.00    | *        |          |
| FP2              | CHEMBL1975121 | 1.000000 | 1000.00    | *        |          |
| hybridization    | CHEMBL1975121 | 0.877451 | 1000.00    | *        |          |
| substructure     | CHEMBL1970217 | 1.000000 | 630.96     | *        |          |
| graph            | CHEMBL1970217 | 0.829268 | 630.96     | *        |          |
| pubchem          | CHEMBL1970217 | 1.000000 | 630.96     | *        |          |
| cdk_maccs        | CHEMBL1975121 | 1.000000 | 1000.00    | *        |          |
| klekota_roth     | CHEMBL1975121 | 1.000000 | 1000.00    | *        |          |

\*\*\* ki ACTIVITY \*\*\* value prediction  
based on 13 locally validated fgps ---> 1080.154  
["TT\_bits", "substructure", "cdk\_maccs", "Pattern", "FP2", "MFP1",  
"klekota\_roth", "pubchem", "graph", "AP\_bits", "FeatMFP1", "RDKit7",  
"hybridization"]

14 rank

Protein kinase C theta : Homo sapiens

score: 12.707 on ChEMBL3920 based on 13 fingerprints

| Fingerprint type | Ligand        | Tanimoto | Similarity | activity | Valid | fg |
|------------------|---------------|----------|------------|----------|-------|----|
| FeatMFP1         | CHEMBL1975121 |          | 1.000000   | 125.89   | *     |    |
| MFP1             | CHEMBL1975121 |          | 1.000000   | 125.89   | *     |    |
| RDKit7           | CHEMBL1975121 |          | 1.000000   | 125.89   | *     |    |
| Pattern          | CHEMBL1975121 |          | 1.000000   | 125.89   | *     |    |
| AP_bits          | CHEMBL1975121 |          | 1.000000   | 125.89   | *     |    |
| TT_bits          | CHEMBL1975121 |          | 1.000000   | 125.89   | *     |    |
| FP2              | CHEMBL1975121 |          | 1.000000   | 125.89   | *     |    |
| hybridization    | CHEMBL1975121 |          | 0.877451   | 125.89   | *     |    |
| substructure     | CHEMBL1975121 |          | 1.000000   | 125.89   | *     |    |
| graph            | CHEMBL1975121 |          | 0.829268   | 125.89   | *     |    |
| pubchem          | CHEMBL1975121 |          | 1.000000   | 125.89   | *     |    |
| cdk_maccs        | CHEMBL1975121 |          | 1.000000   | 125.89   | *     |    |
| klekota_roth     | CHEMBL1975121 |          | 1.000000   | 125.89   | *     |    |

\*\*\* ki ACTIVITY \*\*\* value prediction

based on 13 locally validated fgps ---> 259.806

["TT\_bits", "substructure", "cdk\_maccs", "Pattern", "FP2", "MFP1",  
"klekota\_roth", "pubchem", "graph", "AP\_bits", "FeatMFP1", "RDKit7",  
"hybridization"]

15 rank

Cyclin-dependent kinase 5 : Homo sapiens

score: 12.707 on ChEMBL4036 based on 13 fingerprints

| Fingerprint type | Ligand        | Tanimoto | Similarity | activity | Valid | fg |
|------------------|---------------|----------|------------|----------|-------|----|
| FeatMFP1         | CHEMBL1975121 |          | 1.000000   | 3981.07  | *     |    |
| MFP1             | CHEMBL1975121 |          | 1.000000   | 3981.07  | *     |    |
| RDKit7           | CHEMBL1975121 |          | 1.000000   | 3981.07  | *     |    |
| Pattern          | CHEMBL1975121 |          | 1.000000   | 3981.07  | *     |    |
| AP_bits          | CHEMBL1975121 |          | 1.000000   | 3981.07  | *     |    |
| TT_bits          | CHEMBL1975121 |          | 1.000000   | 3981.07  | *     |    |
| FP2              | CHEMBL1975121 |          | 1.000000   | 3981.07  | *     |    |
| hybridization    | CHEMBL1975121 |          | 0.877451   | 3981.07  | *     |    |
| substructure     | CHEMBL1970217 |          | 1.000000   | 7943.28  | *     |    |
| graph            | CHEMBL1970217 |          | 0.829268   | 7943.28  | *     |    |
| pubchem          | CHEMBL1970217 |          | 1.000000   | 7943.28  | *     |    |
| cdk_maccs        | CHEMBL1975121 |          | 1.000000   | 3981.07  | *     |    |
| klekota_roth     | CHEMBL1975121 |          | 1.000000   | 3981.07  | *     |    |

\*\*\* ki ACTIVITY \*\*\* value prediction

based on 13 locally validated fgps ---> 5508.760

["TT\_bits", "substructure", "cdk\_maccs", "Pattern", "FP2", "MFP1",  
"klekota\_roth", "pubchem", "graph", "AP\_bits", "FeatMFP1", "RDKit7",  
"hybridization"]

16 rank

MAP kinase ERK2 : Homo sapiens

score: 12.707 on ChEMBL4040 based on 13 fingerprints

| Fingerprint type | Ligand        | Tanimoto | Similarity | activity | Valid | fg |
|------------------|---------------|----------|------------|----------|-------|----|
| FeatMFP1         | CHEMBL1975121 |          | 1.000000   | 501.19   | *     |    |
| MFP1             | CHEMBL1975121 |          | 1.000000   | 501.19   | *     |    |
| RDKit7           | CHEMBL1975121 |          | 1.000000   | 501.19   | *     |    |
| Pattern          | CHEMBL1975121 |          | 1.000000   | 501.19   | *     |    |
| AP_bits          | CHEMBL1975121 |          | 1.000000   | 501.19   | *     |    |
| TT_bits          | CHEMBL1975121 |          | 1.000000   | 501.19   | *     |    |
| FP2              | CHEMBL1975121 |          | 1.000000   | 501.19   | *     |    |
| hybridization    | CHEMBL1975121 |          | 0.877451   | 501.19   | *     |    |
| substructure     | CHEMBL1969049 |          | 1.000000   | 630.96   | *     |    |
| graph            | CHEMBL1969049 |          | 0.829268   | 630.96   | *     |    |
| pubchem          | CHEMBL1970217 |          | 1.000000   | 251.19   | *     |    |

```

        cdk_maccs  CHEMBL1975121          1.000000    501.19      *
        klekota_roth CHEMBL1975121          1.000000    501.19      *
        *** ki ACTIVITY *** value prediction
        based on 13 locally validated fgps ---> 655.112
["TT_bits", "substructure", "cdk_maccs", "Pattern", "FP2", "MFP1",
"klekota_roth", "pubchem", "graph", "AP_bits", "FeatMFP1", "RDKit7",
"hybridization"]

```

17 rank

cAMP-dependent protein kinase alpha-catalytic subunit : Homo sapiens  
score: 12.707 on ChEMBL4101 based on 13 fingerprints

| Fingerprint type | Ligand        | Tanimoto | Similarity | activity | Valid | fg |
|------------------|---------------|----------|------------|----------|-------|----|
| FeatMFP1         | CHEMBL1975121 |          | 1.000000   | 12.59    |       | *  |
| MFP1             | CHEMBL1975121 |          | 1.000000   | 12.59    |       | *  |
| RDKit7           | CHEMBL1975121 |          | 1.000000   | 12.59    |       | *  |
| Pattern          | CHEMBL1975121 |          | 1.000000   | 12.59    |       | *  |
| AP_bits          | CHEMBL1975121 |          | 1.000000   | 12.59    |       | *  |
| TT_bits          | CHEMBL1975121 |          | 1.000000   | 12.59    |       | *  |
| FP2              | CHEMBL1975121 |          | 1.000000   | 12.59    |       | *  |
| hybridization    | CHEMBL1975121 |          | 0.877451   | 12.59    |       | *  |
| substructure     | CHEMBL1969049 |          | 1.000000   | 79.43    |       | *  |
| graph            | CHEMBL1969049 |          | 0.829268   | 79.43    |       | *  |
| pubchem          | CHEMBL1970217 |          | 1.000000   | 25.12    |       | *  |
| cdk_maccs        | CHEMBL1975121 |          | 1.000000   | 12.59    |       | *  |
| klekota_roth     | CHEMBL1975121 |          | 1.000000   | 12.59    |       | *  |

```

        *** ki ACTIVITY *** value prediction
        based on 13 locally validated fgps ---> 136.537
["TT_bits", "substructure", "cdk_maccs", "Pattern", "FP2", "MFP1",
"klekota_roth", "pubchem", "graph", "AP_bits", "FeatMFP1", "RDKit7",
"hybridization"]

```

18 rank

Dual specificity protein kinase CLK4 : Homo sapiens  
score: 12.707 on ChEMBL4203 based on 13 fingerprints

| Fingerprint type | Ligand        | Tanimoto | Similarity | activity | Valid | fg |
|------------------|---------------|----------|------------|----------|-------|----|
| FeatMFP1         | CHEMBL1975121 |          | 1.000000   | 251.19   |       | *  |
| MFP1             | CHEMBL1975121 |          | 1.000000   | 251.19   |       | *  |
| RDKit7           | CHEMBL1975121 |          | 1.000000   | 251.19   |       | *  |
| Pattern          | CHEMBL1975121 |          | 1.000000   | 251.19   |       | *  |
| AP_bits          | CHEMBL1975121 |          | 1.000000   | 251.19   |       | *  |
| TT_bits          | CHEMBL1975121 |          | 1.000000   | 251.19   |       | *  |
| FP2              | CHEMBL1975121 |          | 1.000000   | 251.19   |       | *  |
| hybridization    | CHEMBL1975121 |          | 0.877451   | 251.19   |       | *  |
| substructure     | CHEMBL1969049 |          | 1.000000   | 1995.26  |       | *  |
| graph            | CHEMBL1969049 |          | 0.829268   | 1995.26  |       | *  |
| pubchem          | CHEMBL1970217 |          | 1.000000   | 794.33   |       | *  |
| cdk_maccs        | CHEMBL1975121 |          | 1.000000   | 251.19   |       | *  |
| klekota_roth     | CHEMBL1975121 |          | 1.000000   | 251.19   |       | *  |

```

        *** ki ACTIVITY *** value prediction
        based on 13 locally validated fgps ---> 705.105
["TT_bits", "substructure", "cdk_maccs", "Pattern", "FP2", "MFP1",
"klekota_roth", "pubchem", "graph", "AP_bits", "FeatMFP1", "RDKit7",
"hybridization"]

```

19 rank

Ribosomal protein S6 kinase alpha 5 : Homo sapiens  
score: 12.707 on ChEMBL4237 based on 13 fingerprints

| Fingerprint type | Ligand        | Tanimoto | Similarity | activity | Valid | fg |
|------------------|---------------|----------|------------|----------|-------|----|
| FeatMFP1         | CHEMBL1975121 |          | 1.000000   | 19.95    |       | *  |
| MFP1             | CHEMBL1975121 |          | 1.000000   | 19.95    |       | *  |

|               |               |          |         |   |
|---------------|---------------|----------|---------|---|
| RDKit7        | CHEMBL1975121 | 1.000000 | 19.95   | * |
| Pattern       | CHEMBL1975121 | 1.000000 | 19.95   | * |
| AP_bits       | CHEMBL1975121 | 1.000000 | 19.95   | * |
| TT_bits       | CHEMBL1975121 | 1.000000 | 19.95   | * |
| FP2           | CHEMBL1975121 | 1.000000 | 19.95   | * |
| hybridization | CHEMBL1975121 | 0.877451 | 19.95   | * |
| substructure  | CHEMBL1969049 | 1.000000 | 1584.89 | * |
| graph         | CHEMBL1969049 | 0.829268 | 1584.89 | * |
| pubchem       | CHEMBL1970217 | 1.000000 | 199.53  | * |
| cdk_maccs     | CHEMBL1975121 | 1.000000 | 19.95   | * |
| klekota_roth  | CHEMBL1975121 | 1.000000 | 19.95   | * |

\*\*\* ki ACTIVITY \*\*\* value prediction

based on 13 locally validated fgps ---> 461.660

["TT\_bits", "substructure", "cdk\_maccs", "Pattern", "FP2", "MFP1",  
"klekota\_roth", "pubchem", "graph", "AP\_bits", "FeatMFP1", "RDKit7",  
"hybridization"]

20 rank

cGMP-dependent protein kinase 1 beta : Homo sapiens

score: 12.707 on ChEMBL4273 based on 13 fingerprints

| Fingerprint type | Ligand        | Tanimoto | Similarity | activity | Valid fg |
|------------------|---------------|----------|------------|----------|----------|
| FeatMFP1         | CHEMBL1975121 | 1.000000 | 7.943      | *        |          |
| MFP1             | CHEMBL1975121 | 1.000000 | 7.943      | *        |          |
| RDKit7           | CHEMBL1975121 | 1.000000 | 7.943      | *        |          |
| Pattern          | CHEMBL1975121 | 1.000000 | 7.943      | *        |          |
| AP_bits          | CHEMBL1975121 | 1.000000 | 7.943      | *        |          |
| TT_bits          | CHEMBL1975121 | 1.000000 | 7.943      | *        |          |
| FP2              | CHEMBL1975121 | 1.000000 | 7.943      | *        |          |
| hybridization    | CHEMBL1975121 | 0.877451 | 7.943      | *        |          |
| substructure     | CHEMBL1969049 | 1.000000 | 63.100     | *        |          |
| graph            | CHEMBL1969049 | 0.829268 | 63.100     | *        |          |
| pubchem          | CHEMBL1970217 | 1.000000 | 1000.000   | *        |          |
| cdk_maccs        | CHEMBL1975121 | 1.000000 | 7.943      | *        |          |
| klekota_roth     | CHEMBL1975121 | 1.000000 | 7.943      | *        |          |

\*\*\* ki ACTIVITY \*\*\* value prediction

based on 13 locally validated fgps ---> 216.852

["TT\_bits", "substructure", "cdk\_maccs", "Pattern", "FP2", "MFP1",  
"klekota\_roth", "pubchem", "graph", "AP\_bits", "FeatMFP1", "RDKit7",  
"hybridization"]

21 rank

Ribosomal protein S6 kinase 1 : Homo sapiens

score: 12.707 on ChEMBL4501 based on 13 fingerprints

| Fingerprint type | Ligand        | Tanimoto | Similarity | activity | Valid fg |
|------------------|---------------|----------|------------|----------|----------|
| FeatMFP1         | CHEMBL1975121 | 1.000000 | 630.96     | *        |          |
| MFP1             | CHEMBL1975121 | 1.000000 | 630.96     | *        |          |
| RDKit7           | CHEMBL1975121 | 1.000000 | 630.96     | *        |          |
| Pattern          | CHEMBL1975121 | 1.000000 | 630.96     | *        |          |
| AP_bits          | CHEMBL1975121 | 1.000000 | 630.96     | *        |          |
| TT_bits          | CHEMBL1975121 | 1.000000 | 630.96     | *        |          |
| FP2              | CHEMBL1975121 | 1.000000 | 630.96     | *        |          |
| hybridization    | CHEMBL1975121 | 0.877451 | 630.96     | *        |          |
| substructure     | CHEMBL1969049 | 1.000000 | 2511.89    | *        |          |
| graph            | CHEMBL1969049 | 0.829268 | 2511.89    | *        |          |
| pubchem          | CHEMBL1970217 | 1.000000 | 398.11     | *        |          |
| cdk_maccs        | CHEMBL1975121 | 1.000000 | 630.96     | *        |          |
| klekota_roth     | CHEMBL1975121 | 1.000000 | 630.96     | *        |          |

\*\*\* ki ACTIVITY \*\*\* value prediction

based on 13 locally validated fgps ---> 1349.714



["TT\_bits", "substructure", "cdk\_maccs", "Pattern", "FP2", "MFP1",  
"klekota\_roth", "pubchem", "graph", "AP\_bits", "FeatMFP1", "RDKit7",  
"hybridization"]

22 rank

Serine/threonine-protein kinase MRCK-A : Homo sapiens

score: 12.707 on ChEMBL4516 based on 13 fingerprints

| Fingerprint type | Ligand        | Tanimoto Similarity | activity | Valid fg |
|------------------|---------------|---------------------|----------|----------|
| FeatMFP1         | ChEMBL1975121 | 1.000000            | 1258.93  | *        |
| MFP1             | ChEMBL1975121 | 1.000000            | 1258.93  | *        |
| RDKit7           | ChEMBL1975121 | 1.000000            | 1258.93  | *        |
| Pattern          | ChEMBL1975121 | 1.000000            | 1258.93  | *        |
| AP_bits          | ChEMBL1975121 | 1.000000            | 1258.93  | *        |
| TT_bits          | ChEMBL1975121 | 1.000000            | 1258.93  | *        |
| FP2              | ChEMBL1975121 | 1.000000            | 1258.93  | *        |
| hybridization    | ChEMBL1975121 | 0.877451            | 1258.93  | *        |
| substructure     | ChEMBL1969049 | 1.000000            | 1995.26  | *        |
| graph            | ChEMBL1969049 | 0.829268            | 1995.26  | *        |
| pubchem          | ChEMBL1970217 | 1.000000            | 1995.26  | *        |
| cdk_maccs        | ChEMBL1975121 | 1.000000            | 1258.93  | *        |
| klekota_roth     | ChEMBL1975121 | 1.000000            | 1258.93  | *        |

\*\*\* ki ACTIVITY \*\*\* value prediction

based on 13 locally validated fgps ---> 1487.018

["TT\_bits", "substructure", "cdk\_maccs", "Pattern", "FP2", "MFP1",  
"klekota\_roth", "pubchem", "graph", "AP\_bits", "FeatMFP1", "RDKit7",  
"hybridization"]

23 rank

Serine/threonine-protein kinase Chk1 : Homo sapiens

score: 12.707 on ChEMBL4630 based on 13 fingerprints

| Fingerprint type | Ligand        | Tanimoto Similarity | activity | Valid fg |
|------------------|---------------|---------------------|----------|----------|
| FeatMFP1         | ChEMBL1975121 | 1.000000            | 7943.28  | *        |
| MFP1             | ChEMBL1975121 | 1.000000            | 7943.28  | *        |
| RDKit7           | ChEMBL1975121 | 1.000000            | 7943.28  | *        |
| Pattern          | ChEMBL1975121 | 1.000000            | 7943.28  | *        |
| AP_bits          | ChEMBL1975121 | 1.000000            | 7943.28  | *        |
| TT_bits          | ChEMBL1975121 | 1.000000            | 7943.28  | *        |
| FP2              | ChEMBL1975121 | 1.000000            | 7943.28  | *        |
| hybridization    | ChEMBL1975121 | 0.877451            | 7943.28  | *        |
| substructure     | ChEMBL1970217 | 1.000000            | 5011.87  | *        |
| graph            | ChEMBL1970217 | 0.829268            | 5011.87  | *        |
| pubchem          | ChEMBL1970217 | 1.000000            | 5011.87  | *        |
| cdk_maccs        | ChEMBL1975121 | 1.000000            | 7943.28  | *        |
| klekota_roth     | ChEMBL1975121 | 1.000000            | 7943.28  | *        |

\*\*\* ki ACTIVITY \*\*\* value prediction

based on 13 locally validated fgps ---> 6854.637

["TT\_bits", "substructure", "cdk\_maccs", "Pattern", "FP2", "MFP1",  
"klekota\_roth", "pubchem", "graph", "AP\_bits", "FeatMFP1", "RDKit7",  
"hybridization"]

24 rank

Misshapen-like kinase 1 : Homo sapiens

score: 12.707 on ChEMBL5518 based on 13 fingerprints

| Fingerprint type | Ligand        | Tanimoto Similarity | activity | Valid fg |
|------------------|---------------|---------------------|----------|----------|
| FeatMFP1         | ChEMBL1975121 | 1.000000            | 7943.28  | *        |
| MFP1             | ChEMBL1975121 | 1.000000            | 7943.28  | *        |
| RDKit7           | ChEMBL1975121 | 1.000000            | 7943.28  | *        |
| Pattern          | ChEMBL1975121 | 1.000000            | 7943.28  | *        |
| AP_bits          | ChEMBL1975121 | 1.000000            | 7943.28  | *        |
| TT_bits          | ChEMBL1975121 | 1.000000            | 7943.28  | *        |

|               |               |          |         |   |
|---------------|---------------|----------|---------|---|
| FP2           | CHEMBL1975121 | 1.000000 | 7943.28 | * |
| hybridization | CHEMBL1975121 | 0.877451 | 7943.28 | * |
| substructure  | CHEMBL1975121 | 1.000000 | 7943.28 | * |
| graph         | CHEMBL1975121 | 0.829268 | 7943.28 | * |
| pubchem       | CHEMBL1975121 | 1.000000 | 7943.28 | * |
| cdk_maccs     | CHEMBL1975121 | 1.000000 | 7943.28 | * |
| klekota_roth  | CHEMBL1975121 | 1.000000 | 7943.28 | * |

\*\*\* ki ACTIVITY \*\*\* value prediction  
based on 13 locally validated fgps ---> 6813.416  
["TT\_bits", "substructure", "cdk\_maccs", "Pattern", "FP2", "MFP1",  
"klekota\_roth", "pubchem", "graph", "AP\_bits", "FeatMFP1", "RDKit7",  
"hybridization"]

25 rank  
Serine/threonine-protein kinase Sgk2 : Homo sapiens  
score: 12.707 on ChEMBL5794 based on 13 fingerprints

| Fingerprint type | Ligand        | Tanimoto Similarity | activity | Valid fg |
|------------------|---------------|---------------------|----------|----------|
| FeatMFP1         | CHEMBL1975121 | 1.000000            | 398.11   | *        |
| MFP1             | CHEMBL1975121 | 1.000000            | 398.11   | *        |
| RDKit7           | CHEMBL1975121 | 1.000000            | 398.11   | *        |
| Pattern          | CHEMBL1975121 | 1.000000            | 398.11   | *        |
| AP_bits          | CHEMBL1975121 | 1.000000            | 398.11   | *        |
| TT_bits          | CHEMBL1975121 | 1.000000            | 398.11   | *        |
| FP2              | CHEMBL1975121 | 1.000000            | 398.11   | *        |
| hybridization    | CHEMBL1975121 | 0.877451            | 398.11   | *        |
| substructure     | CHEMBL1969049 | 1.000000            | 316.23   | *        |
| graph            | CHEMBL1969049 | 0.829268            | 316.23   | *        |
| pubchem          | CHEMBL1970217 | 1.000000            | 199.53   | *        |
| cdk_maccs        | CHEMBL1975121 | 1.000000            | 398.11   | *        |
| klekota_roth     | CHEMBL1975121 | 1.000000            | 398.11   | *        |

\*\*\* ki ACTIVITY \*\*\* value prediction  
based on 13 locally validated fgps ---> 605.572  
["TT\_bits", "substructure", "cdk\_maccs", "Pattern", "FP2", "MFP1",  
"klekota\_roth", "pubchem", "graph", "AP\_bits", "FeatMFP1", "RDKit7",  
"hybridization"]

26 rank  
Serine/threonine-protein kinase PRKX : Homo sapiens  
score: 12.707 on ChEMBL5818 based on 13 fingerprints

| Fingerprint type | Ligand        | Tanimoto Similarity | activity | Valid fg |
|------------------|---------------|---------------------|----------|----------|
| FeatMFP1         | CHEMBL1975121 | 1.000000            | 39.81    | *        |
| MFP1             | CHEMBL1975121 | 1.000000            | 39.81    | *        |
| RDKit7           | CHEMBL1975121 | 1.000000            | 39.81    | *        |
| Pattern          | CHEMBL1975121 | 1.000000            | 39.81    | *        |
| AP_bits          | CHEMBL1975121 | 1.000000            | 39.81    | *        |
| TT_bits          | CHEMBL1975121 | 1.000000            | 39.81    | *        |
| FP2              | CHEMBL1975121 | 1.000000            | 39.81    | *        |
| hybridization    | CHEMBL1975121 | 0.877451            | 39.81    | *        |
| substructure     | CHEMBL1969049 | 1.000000            | 63.10    | *        |
| graph            | CHEMBL1969049 | 0.829268            | 63.10    | *        |
| pubchem          | CHEMBL1970217 | 1.000000            | 39.81    | *        |
| cdk_maccs        | CHEMBL1975121 | 1.000000            | 39.81    | *        |
| klekota_roth     | CHEMBL1975121 | 1.000000            | 39.81    | *        |

\*\*\* ki ACTIVITY \*\*\* value prediction  
based on 13 locally validated fgps ---> 154.267  
["TT\_bits", "substructure", "cdk\_maccs", "Pattern", "FP2", "MFP1",  
"klekota\_roth", "pubchem", "graph", "AP\_bits", "FeatMFP1", "RDKit7",  
"hybridization"]

27 rank

Serine/threonine-protein kinase Nek4 : Homo sapiens

score: 12.707 on ChEMBL5819 based on 13 fingerprints

| Fingerprint type | Ligand        | Tanimoto | Similarity | activity | Valid | fg |
|------------------|---------------|----------|------------|----------|-------|----|
| FeatMFP1         | CHEMBL1975121 |          | 1.000000   | 3162.28  |       | *  |
| MFP1             | CHEMBL1975121 |          | 1.000000   | 3162.28  |       | *  |
| RDKit7           | CHEMBL1975121 |          | 1.000000   | 3162.28  |       | *  |
| Pattern          | CHEMBL1975121 |          | 1.000000   | 3162.28  |       | *  |
| AP_bits          | CHEMBL1975121 |          | 1.000000   | 3162.28  |       | *  |
| TT_bits          | CHEMBL1975121 |          | 1.000000   | 3162.28  |       | *  |
| FP2              | CHEMBL1975121 |          | 1.000000   | 3162.28  |       | *  |
| hybridization    | CHEMBL1975121 |          | 0.877451   | 3162.28  |       | *  |
| substructure     | CHEMBL1970217 |          | 1.000000   | 5011.87  |       | *  |
| graph            | CHEMBL1970217 |          | 0.829268   | 5011.87  |       | *  |
| pubchem          | CHEMBL1970217 |          | 1.000000   | 5011.87  |       | *  |
| cdk_maccs        | CHEMBL1975121 |          | 1.000000   | 3162.28  |       | *  |
| klekota_roth     | CHEMBL1975121 |          | 1.000000   | 3162.28  |       | *  |

\*\*\* ki ACTIVITY \*\*\* value prediction

based on 13 locally validated fgps ---> 3514.274

["TT\_bits", "substructure", "cdk\_maccs", "Pattern", "FP2", "MFP1",  
"klekota\_roth", "pubchem", "graph", "AP\_bits", "FeatMFP1", "RDKit7",  
"hybridization"]

28 rank

Ribosomal protein S6 kinase alpha 3 : Homo sapiens

score: 11.841 on ChEMBL2345 based on 13 fingerprints

| Fingerprint type | Ligand        | Tanimoto | Similarity | activity | Valid | fg |
|------------------|---------------|----------|------------|----------|-------|----|
| FeatMFP1         | CHEMBL1969049 |          | 0.947368   | 3981.07  |       | *  |
| MFP1             | CHEMBL1969049 |          | 0.892857   | 3981.07  |       | *  |
| RDKit7           | CHEMBL1976240 |          | 0.896082   | 316.23   |       | *  |
| Pattern          | CHEMBL1976240 |          | 0.978395   | 316.23   |       | *  |
| AP_bits          | CHEMBL1969049 |          | 0.875536   | 3981.07  |       | *  |
| TT_bits          | CHEMBL1976240 |          | 0.833333   | 316.23   |       | *  |
| FP2              | CHEMBL1969049 |          | 0.922222   | 3981.07  |       | *  |
| hybridization    | CHEMBL1970217 |          | 0.806306   | 398.11   |       | *  |
| substructure     | CHEMBL1969049 |          | 1.000000   | 3981.07  |       | *  |
| graph            | CHEMBL1969049 |          | 0.829268   | 3981.07  |       | *  |
| pubchem          | CHEMBL1970217 |          | 1.000000   | 398.11   |       | *  |
| cdk_maccs        | CHEMBL1969049 |          | 0.911765   | 3981.07  |       | *  |
| klekota_roth     | CHEMBL1970217 |          | 0.947368   | 398.11   |       | *  |

\*\*\* ki ACTIVITY \*\*\* value prediction

based on 13 locally validated fgps ---> 1703.729

["TT\_bits", "substructure", "cdk\_maccs", "Pattern", "FP2", "MFP1",  
"klekota\_roth", "pubchem", "graph", "AP\_bits", "FeatMFP1", "RDKit7",  
"hybridization"]

29 rank

Serine/threonine-protein kinase AKT : Homo sapiens

score: 11.841 on ChEMBL4282 based on 13 fingerprints

| Fingerprint type | Ligand        | Tanimoto | Similarity | activity | Valid | fg |
|------------------|---------------|----------|------------|----------|-------|----|
| FeatMFP1         | CHEMBL1969049 |          | 0.947368   | 1995.26  |       | *  |
| MFP1             | CHEMBL1969049 |          | 0.892857   | 1995.26  |       | *  |
| RDKit7           | CHEMBL1976240 |          | 0.896082   | 199.53   |       | *  |
| Pattern          | CHEMBL1976240 |          | 0.978395   | 199.53   |       | *  |
| AP_bits          | CHEMBL1969049 |          | 0.875536   | 1995.26  |       | *  |
| TT_bits          | CHEMBL1976240 |          | 0.833333   | 199.53   |       | *  |
| FP2              | CHEMBL1969049 |          | 0.922222   | 1995.26  |       | *  |
| hybridization    | CHEMBL1970217 |          | 0.806306   | 630.96   |       | *  |
| substructure     | CHEMBL1969049 |          | 1.000000   | 1995.26  |       | *  |
| graph            | CHEMBL1969049 |          | 0.829268   | 1995.26  |       | *  |
| pubchem          | CHEMBL1970217 |          | 1.000000   | 630.96   |       | *  |

```

        cdk_maccs  CHEMBL1969049          0.911765    1995.26      *
        klekota_roth CHEMBL1970217        0.947368     630.96      *
        *** ki ACTIVITY *** value prediction
        based on 13 locally validated fgps ---> 1020.087
["TT_bits", "substructure", "cdk_maccs", "Pattern", "FP2", "MFP1",
"klekota_roth", "pubchem", "graph", "AP_bits", "FeatMFP1", "RDKit7",
"hybridization"]

```

30 rank

Serine/threonine-protein kinase AKT3 : Homo sapiens

score: 11.841 on ChEMBL4816 based on 13 fingerprints

| Fingerprint type | Ligand        | Tanimoto | Similarity | activity | Valid | fg |
|------------------|---------------|----------|------------|----------|-------|----|
| FeatMFP1         | CHEMBL1969049 |          | 0.947368   | 7943.28  | *     |    |
| MFP1             | CHEMBL1969049 |          | 0.892857   | 7943.28  | *     |    |
| RDKit7           | CHEMBL1976240 |          | 0.896082   | 630.96   | *     |    |
| Pattern          | CHEMBL1976240 |          | 0.978395   | 630.96   | *     |    |
| AP_bits          | CHEMBL1969049 |          | 0.875536   | 7943.28  | *     |    |
| TT_bits          | CHEMBL1976240 |          | 0.833333   | 630.96   | *     |    |
| FP2              | CHEMBL1969049 |          | 0.922222   | 7943.28  | *     |    |
| hybridization    | CHEMBL1970217 |          | 0.806306   | 1995.26  | *     |    |
| substructure     | CHEMBL1969049 |          | 1.000000   | 7943.28  | *     |    |
| graph            | CHEMBL1969049 |          | 0.829268   | 7943.28  | *     |    |
| pubchem          | CHEMBL1970217 |          | 1.000000   | 1995.26  | *     |    |
| cdk_maccs        | CHEMBL1969049 |          | 0.911765   | 7943.28  | *     |    |
| klekota_roth     | CHEMBL1970217 |          | 0.947368   | 1995.26  | *     |    |

```

        *** ki ACTIVITY *** value prediction
        based on 13 locally validated fgps ---> 4060.324
["TT_bits", "substructure", "cdk_maccs", "Pattern", "FP2", "MFP1",
"klekota_roth", "pubchem", "graph", "AP_bits", "FeatMFP1", "RDKit7",
"hybridization"]

```

31 rank

Dual-specificity tyrosine-phosphorylation regulated kinase 1A : Homo sapiens

score: 11.773 on ChEMBL2292 based on 13 fingerprints

| Fingerprint type | Ligand        | Tanimoto | Similarity | activity | Valid | fg |
|------------------|---------------|----------|------------|----------|-------|----|
| FeatMFP1         | CHEMBL1970217 |          | 0.947368   | 2511.89  | *     |    |
| MFP1             | CHEMBL1970217 |          | 0.862069   | 2511.89  | *     |    |
| RDKit7           | CHEMBL1976240 |          | 0.896082   | 5011.87  | *     |    |
| Pattern          | CHEMBL1976240 |          | 0.978395   | 5011.87  | *     |    |
| AP_bits          | CHEMBL1970217 |          | 0.848739   | 2511.89  | *     |    |
| TT_bits          | CHEMBL1976240 |          | 0.833333   | 5011.87  | *     |    |
| FP2              | CHEMBL1970217 |          | 0.912088   | 2511.89  | *     |    |
| hybridization    | CHEMBL1970217 |          | 0.806306   | 2511.89  | *     |    |
| substructure     | CHEMBL1970217 |          | 1.000000   | 2511.89  | *     |    |
| graph            | CHEMBL1970217 |          | 0.829268   | 2511.89  | *     |    |
| pubchem          | CHEMBL1970217 |          | 1.000000   | 2511.89  | *     |    |
| cdk_maccs        | CHEMBL1970217 |          | 0.911765   | 2511.89  | *     |    |
| klekota_roth     | CHEMBL1970217 |          | 0.947368   | 2511.89  | *     |    |

```

        *** ki ACTIVITY *** value prediction
        based on 13 locally validated fgps ---> 3258.708
["TT_bits", "substructure", "cdk_maccs", "Pattern", "FP2", "MFP1",
"klekota_roth", "pubchem", "graph", "AP_bits", "FeatMFP1", "RDKit7",
"hybridization"]

```

32 rank

Mitogen-activated protein kinase kinase kinase 4 : Homo sapiens

score: 11.773 on ChEMBL6166 based on 13 fingerprints

| Fingerprint type | Ligand        | Tanimoto | Similarity | activity | Valid | fg |
|------------------|---------------|----------|------------|----------|-------|----|
| FeatMFP1         | CHEMBL1970217 |          | 0.947368   | 2511.89  | *     |    |

|               |               |          |         |   |
|---------------|---------------|----------|---------|---|
| MFP1          | CHEMBL1970217 | 0.862069 | 2511.89 | * |
| RDKit7        | CHEMBL1976240 | 0.896082 | 1995.26 | * |
| Pattern       | CHEMBL1976240 | 0.978395 | 1995.26 | * |
| AP_bits       | CHEMBL1970217 | 0.848739 | 2511.89 | * |
| TT_bits       | CHEMBL1976240 | 0.833333 | 1995.26 | * |
| FP2           | CHEMBL1970217 | 0.912088 | 2511.89 | * |
| hybridization | CHEMBL1970217 | 0.806306 | 2511.89 | * |
| substructure  | CHEMBL1970217 | 1.000000 | 2511.89 | * |
| graph         | CHEMBL1970217 | 0.829268 | 2511.89 | * |
| pubchem       | CHEMBL1970217 | 1.000000 | 2511.89 | * |
| cdk_maccs     | CHEMBL1970217 | 0.911765 | 2511.89 | * |
| klekota_roth  | CHEMBL1970217 | 0.947368 | 2511.89 | * |

\*\*\* ki ACTIVITY \*\*\* value prediction

based on 13 locally validated fgps ---> 3083.520

["TT\_bits", "substructure", "cdk\_maccs", "Pattern", "FP2", "MFP1", "klekota\_roth", "pubchem", "graph", "AP\_bits", "FeatMFP1", "RDKit7", "hybridization"]

33 rank

Dual specificity protein kinase CLK2 : Homo sapiens

score: 11.614 on ChEMBL4225 based on 13 fingerprints

| Fingerprint type | Ligand        | Tanimoto | Similarity | activity | Valid | fg |
|------------------|---------------|----------|------------|----------|-------|----|
| FeatMFP1         | CHEMBL1970217 |          | 0.947368   | 3981.07  |       | *  |
| MFP1             | CHEMBL1970217 |          | 0.862069   | 3981.07  |       | *  |
| RDKit7           | CHEMBL1970217 |          | 0.863711   | 3981.07  |       | *  |
| Pattern          | CHEMBL1970217 |          | 0.929619   | 3981.07  |       | *  |
| AP_bits          | CHEMBL1970217 |          | 0.848739   | 3981.07  |       | *  |
| TT_bits          | CHEMBL1970217 |          | 0.755556   | 3981.07  |       | *  |
| FP2              | CHEMBL1970217 |          | 0.912088   | 3981.07  |       | *  |
| hybridization    | CHEMBL1970217 |          | 0.806306   | 3981.07  |       | *  |
| substructure     | CHEMBL1970217 |          | 1.000000   | 3981.07  |       | *  |
| graph            | CHEMBL1970217 |          | 0.829268   | 3981.07  |       | *  |
| pubchem          | CHEMBL1970217 |          | 1.000000   | 3981.07  |       | *  |
| cdk_maccs        | CHEMBL1970217 |          | 0.911765   | 3981.07  |       | *  |
| klekota_roth     | CHEMBL1970217 |          | 0.947368   | 3981.07  |       | *  |

\*\*\* ki ACTIVITY \*\*\* value prediction

based on 13 locally validated fgps ---> 4095.601

["TT\_bits", "substructure", "cdk\_maccs", "Pattern", "FP2", "MFP1", "klekota\_roth", "pubchem", "graph", "AP\_bits", "FeatMFP1", "RDKit7", "hybridization"]

34 rank

Serine/threonine-protein kinase Aurora-B : Homo sapiens

score: 10.576 on ChEMBL2185 based on 12 fingerprints

| Fingerprint type | Ligand        | Tanimoto | Similarity | activity | Valid | fg |
|------------------|---------------|----------|------------|----------|-------|----|
| FeatMFP1         | CHEMBL1984633 |          | 0.947368   | 3162.28  |       | *  |
| MFP1             | CHEMBL1994724 |          | 0.827586   | 398.11   |       | *  |
| RDKit7           | CHEMBL1976240 |          | 0.896082   | 6309.57  |       | *  |
| Pattern          | CHEMBL1976240 |          | 0.978395   | 6309.57  |       | *  |
| AP_bits          | CHEMBL1976240 |          | 0.772908   | 6309.57  |       | *  |
| TT_bits          | CHEMBL1976240 |          | 0.833333   | 6309.57  |       | *  |
| FP2              | CHEMBL1976240 |          | 0.892473   | 6309.57  |       | *  |
| hybridization    | CHEMBL1976240 |          | 0.797357   | 6309.57  |       | *  |
| substructure     | CHEMBL1994724 |          | 0.937500   | 398.11   |       | *  |
| graph            | CHEMBL1976240 |          | 0.755556   | 6309.57  |       | *  |
| pubchem          | CHEMBL1976240 |          | 0.983146   | 6309.57  |       | *  |
| cdk_maccs        | CHEMBL1994724 |          | 0.837838   | 398.11   |       | *  |
| klekota_roth     | CHEMBL1984633 |          | 0.871795   | 3162.28  |       | *  |

\*\*\* ki ACTIVITY \*\*\* value prediction

based on 12 locally validated fgps ---> 3348.419

["TT\_bits", "substructure", "cdk\_maccs", "Pattern", "FP2", "MFP1",  
 "klekota\_roth", "pubchem", "AP\_bits", "FeatMFP1", "RDKit7",  
 "hybridization"]

35 rank

Vascular endothelial growth factor receptor 3 : Homo sapiens

score: 10.260 on ChEMBL1955 based on 12 fingerprints

| Fingerprint type | Ligand        | Tanimoto | Similarity | activity | Valid | fg |
|------------------|---------------|----------|------------|----------|-------|----|
| FeatMFP1         | ChEMBL2004934 |          | 0.857143   | 6309.57  | *     |    |
| MFP1             | ChEMBL2004934 |          | 0.862069   | 6309.57  | *     |    |
| RDKit7           | ChEMBL2004934 |          | 0.790977   | 6309.57  | *     |    |
| Pattern          | ChEMBL1999428 |          | 0.895899   | 501.19   | *     |    |
| AP_bits          | ChEMBL2004934 |          | 0.834025   | 6309.57  | *     |    |
| TT_bits          | ChEMBL2004934 |          | 0.777778   | 6309.57  | *     |    |
| FP2              | ChEMBL2004934 |          | 0.873684   | 6309.57  | *     |    |
| hybridization    | ChEMBL2004934 |          | 0.795556   | 6309.57  | *     |    |
| substructure     | ChEMBL2004934 |          | 0.937500   | 6309.57  | *     |    |
| graph            | ChEMBL2004934 |          | 0.723404   | 6309.57  | *     |    |
| pubchem          | ChEMBL2004934 |          | 0.983146   | 6309.57  | *     |    |
| cdk_maccs        | ChEMBL2004934 |          | 0.837838   | 6309.57  | *     |    |
| klekota_roth     | ChEMBL2004934 |          | 0.813953   | 6309.57  | *     |    |

\*\*\* ki ACTIVITY \*\*\* value prediction

based on 12 locally validated fgps ---> 4188.072

["TT\_bits", "substructure", "cdk\_maccs", "Pattern", "FP2", "MFP1",  
 "klekota\_roth", "pubchem", "AP\_bits", "FeatMFP1", "RDKit7",  
 "hybridization"]

36 rank

Dual-specificity tyrosine-phosphorylation regulated kinase 3 : Homo sapiens

score: 9.666 on ChEMBL4575 based on 11 fingerprints

| Fingerprint type | Ligand        | Tanimoto | Similarity | activity | Valid | fg |
|------------------|---------------|----------|------------|----------|-------|----|
| FeatMFP1         | ChEMBL1984633 |          | 0.947368   | 1995.26  | *     |    |
| MFP1             | ChEMBL1984633 |          | 0.774194   | 1995.26  | *     |    |
| RDKit7           | ChEMBL2007296 |          | 0.939286   | 794.33   | *     |    |
| Pattern          | ChEMBL2007296 |          | 0.969419   | 794.33   | *     |    |
| AP_bits          | ChEMBL2007296 |          | 0.722628   | 794.33   | *     |    |
| TT_bits          | ChEMBL2007296 |          | 0.857143   | 794.33   | *     |    |
| FP2              | ChEMBL2007296 |          | 0.922222   | 794.33   | *     |    |
| hybridization    | ChEMBL2007296 |          | 0.746888   | 794.33   | *     |    |
| substructure     | ChEMBL2007296 |          | 0.937500   | 794.33   | *     |    |
| graph            | ChEMBL2007296 |          | 0.739130   | 794.33   | *     |    |
| pubchem          | ChEMBL2007296 |          | 0.977654   | 794.33   | *     |    |
| cdk_maccs        | ChEMBL1984633 |          | 0.775000   | 1995.26  | *     |    |
| klekota_roth     | ChEMBL1984633 |          | 0.871795   | 1995.26  | *     |    |

\*\*\* ki ACTIVITY \*\*\* value prediction

based on 11 locally validated fgps ---> 948.221

["TT\_bits", "substructure", "Pattern", "FP2", "MFP1", "klekota\_roth",  
 "pubchem", "AP\_bits", "FeatMFP1", "RDKit7", "hybridization"]

37 rank

Serine/threonine-protein kinase Chk2 : Homo sapiens

score: 9.495 on ChEMBL2527 based on 11 fingerprints

| Fingerprint type | Ligand        | Tanimoto | Similarity | activity | Valid | fg |
|------------------|---------------|----------|------------|----------|-------|----|
| FeatMFP1         | ChEMBL1976240 |          | 0.850000   | 398.11   | *     |    |
| MFP1             | ChEMBL1976240 |          | 0.766667   | 398.11   | *     |    |
| RDKit7           | ChEMBL1976240 |          | 0.896082   | 398.11   | *     |    |
| Pattern          | ChEMBL1976240 |          | 0.978395   | 398.11   | *     |    |
| AP_bits          | ChEMBL1976240 |          | 0.772908   | 398.11   | *     |    |
| TT_bits          | ChEMBL1976240 |          | 0.833333   | 398.11   | *     |    |

|               |               |          |        |   |
|---------------|---------------|----------|--------|---|
| FP2           | CHEMBL1976240 | 0.892473 | 398.11 | * |
| hybridization | CHEMBL1976240 | 0.797357 | 398.11 | * |
| substructure  | CHEMBL1969264 | 0.875000 | 794.33 | * |
| graph         | CHEMBL1976240 | 0.755556 | 398.11 |   |
| pubchem       | CHEMBL1976240 | 0.983146 | 398.11 | * |
| cdk_maccs     | CHEMBL1976240 | 0.731707 | 398.11 |   |
| klekota_roth  | CHEMBL1976240 | 0.850000 | 398.11 | * |

\*\*\* ki ACTIVITY \*\*\* value prediction

based on 11 locally validated fgps ---> 450.893

["TT\_bits", "substructure", "Pattern", "FP2", "MFP1", "klekota\_roth", "pubchem", "AP\_bits", "FeatMFP1", "RDKit7", "hybridization"]

38 rank

AMP-activated protein kinase, alpha-1 subunit : Homo sapiens

score: 9.495 on ChEMBL4045 based on 11 fingerprints

| Fingerprint type | Ligand        | Tanimoto | Similarity | activity | Valid fg |
|------------------|---------------|----------|------------|----------|----------|
| FeatMFP1         | CHEMBL1976240 |          | 0.850000   | 251.19   | *        |
| MFP1             | CHEMBL1976240 |          | 0.766667   | 251.19   | *        |
| RDKit7           | CHEMBL1976240 |          | 0.896082   | 251.19   | *        |
| Pattern          | CHEMBL1976240 |          | 0.978395   | 251.19   | *        |
| AP_bits          | CHEMBL1976240 |          | 0.772908   | 251.19   | *        |
| TT_bits          | CHEMBL1976240 |          | 0.833333   | 251.19   | *        |
| FP2              | CHEMBL1976240 |          | 0.892473   | 251.19   | *        |
| hybridization    | CHEMBL1976240 |          | 0.797357   | 251.19   | *        |
| substructure     | CHEMBL1969264 |          | 0.875000   | 501.19   | *        |
| graph            | CHEMBL1976240 |          | 0.755556   | 251.19   |          |
| pubchem          | CHEMBL1976240 |          | 0.983146   | 251.19   | *        |
| cdk_maccs        | CHEMBL1976240 |          | 0.731707   | 251.19   |          |
| klekota_roth     | CHEMBL1976240 |          | 0.850000   | 251.19   | *        |

\*\*\* ki ACTIVITY \*\*\* value prediction

based on 11 locally validated fgps ---> 326.755

["TT\_bits", "substructure", "Pattern", "FP2", "MFP1", "klekota\_roth", "pubchem", "AP\_bits", "FeatMFP1", "RDKit7", "hybridization"]

39 rank

Casein kinase I alpha : Homo sapiens

score: 8.135 on ChEMBL2793 based on 10 fingerprints

| Fingerprint type | Ligand        | Tanimoto | Similarity | activity | Valid fg |
|------------------|---------------|----------|------------|----------|----------|
| FeatMFP1         | CHEMBL1994724 |          | 0.900000   | 1584.89  | *        |
| MFP1             | CHEMBL1994724 |          | 0.827586   | 1584.89  | *        |
| RDKit7           | CHEMBL1990254 |          | 0.716753   | 5011.87  |          |
| Pattern          | CHEMBL1990254 |          | 0.911950   | 5011.87  | *        |
| AP_bits          | CHEMBL1994724 |          | 0.620690   | 1584.89  | *        |
| TT_bits          | CHEMBL1994724 |          | 0.702128   | 1584.89  | *        |
| FP2              | CHEMBL1990254 |          | 0.706522   | 5011.87  | *        |
| hybridization    | CHEMBL1994724 |          | 0.640569   | 1584.89  |          |
| substructure     | CHEMBL1994724 |          | 0.937500   | 1584.89  | *        |
| graph            | CHEMBL1997275 |          | 0.698925   | 2511.89  |          |
| pubchem          | CHEMBL1994724 |          | 0.880829   | 1584.89  | *        |
| cdk_maccs        | CHEMBL1994724 |          | 0.837838   | 1584.89  | *        |
| klekota_roth     | CHEMBL1994724 |          | 0.809524   | 1584.89  | *        |

\*\*\* ki ACTIVITY \*\*\* value prediction

based on 10 locally validated fgps ---> 2453.148

["TT\_bits", "substructure", "Pattern", "AP\_bits", "MFP1", "pubchem", "FP2", "FeatMFP1", "klekota\_roth", "cdk\_maccs"]

40 rank

Macrophage colony stimulating factor receptor : Homo sapiens

score: 8.129 on ChEMBL1844 based on 10 fingerprints

| Fingerprint type | Ligand | Tanimoto | Similarity | activity | Valid fg |
|------------------|--------|----------|------------|----------|----------|
|------------------|--------|----------|------------|----------|----------|

| Fingerprint type | Ligand        | Tanimoto | Similarity | activity | Valid fg |
|------------------|---------------|----------|------------|----------|----------|
| FeatMFP1         | CHEMBL1999428 | 0.833333 | 2511.89    | *        |          |
| MFP1             | CHEMBL1999428 | 0.800000 | 2511.89    | *        |          |
| RDKit7           | CHEMBL1999428 | 0.785171 | 2511.89    | *        |          |
| Pattern          | CHEMBL1999428 | 0.895899 | 2511.89    | *        |          |
| AP_bits          | CHEMBL1999428 | 0.768519 | 2511.89    | *        |          |
| TT_bits          | CHEMBL1999428 | 0.756098 | 2511.89    | *        |          |
| FP2              | CHEMBL1999428 | 0.783133 | 2511.89    | *        |          |
| hybridization    | CHEMBL1999428 | 0.651961 | 2511.89    |          |          |
| substructure     | CHEMBL1999428 | 0.933333 | 2511.89    | *        |          |
| graph            | CHEMBL1999428 | 0.597561 | 2511.89    |          |          |
| pubchem          | CHEMBL1991356 | 0.866667 | 2511.89    | *        |          |
| cdk_maccs        | CHEMBL1991356 | 0.731707 | 2511.89    |          |          |
| klekota_roth     | CHEMBL1999428 | 0.707317 | 2511.89    | *        |          |

\*\*\* ki ACTIVITY \*\*\* value prediction  
based on 10 locally validated fgps ---> 2486.892  
["TT\_bits", "substructure", "Pattern", "FP2", "MFP1", "klekota\_roth",  
"pubchem", "AP\_bits", "FeatMFP1", "RDKit7"]

41 rank

Serine/threonine-protein kinase c-TAK1 : Homo sapiens

score: 8.062 on ChEMBL5600 based on 10 fingerprints

| Fingerprint type | Ligand        | Tanimoto | Similarity | activity | Valid fg |
|------------------|---------------|----------|------------|----------|----------|
| FeatMFP1         | CHEMBL1991188 | 0.857143 | 3162.28    | *        |          |
| MFP1             | CHEMBL1991188 | 0.750000 | 3162.28    | *        |          |
| RDKit7           | CHEMBL1990254 | 0.716753 | 5011.87    |          |          |
| Pattern          | CHEMBL1990254 | 0.911950 | 5011.87    | *        |          |
| AP_bits          | CHEMBL1991188 | 0.680556 | 3162.28    | *        |          |
| TT_bits          | CHEMBL2006188 | 0.700000 | 5011.87    | *        |          |
| FP2              | CHEMBL1991188 | 0.790476 | 3162.28    | *        |          |
| hybridization    | CHEMBL1991188 | 0.728745 | 3162.28    | *        |          |
| substructure     | CHEMBL1991188 | 0.882353 | 3162.28    | *        |          |
| graph            | CHEMBL2006188 | 0.680000 | 5011.87    |          |          |
| pubchem          | CHEMBL1991188 | 0.951087 | 3162.28    | *        |          |
| cdk_maccs        | CHEMBL1991188 | 0.756098 | 3162.28    |          |          |
| klekota_roth     | CHEMBL1991188 | 0.809524 | 3162.28    | *        |          |

\*\*\* ki ACTIVITY \*\*\* value prediction  
based on 10 locally validated fgps ---> 3883.412  
["TT\_bits", "substructure", "Pattern", "AP\_bits", "MFP1", "pubchem",  
"FP2", "FeatMFP1", "klekota\_roth", "hybridization"]

42 rank

Serine/threonine-protein kinase 2 : Homo sapiens

score: 7.984 on ChEMBL4202 based on 10 fingerprints

| Fingerprint type | Ligand        | Tanimoto | Similarity | activity | Valid fg |
|------------------|---------------|----------|------------|----------|----------|
| FeatMFP1         | CHEMBL1991188 | 0.857143 | 6309.57    | *        |          |
| MFP1             | CHEMBL1991188 | 0.750000 | 6309.57    | *        |          |
| RDKit7           | CHEMBL1990254 | 0.716753 | 2511.89    |          |          |
| Pattern          | CHEMBL1990254 | 0.911950 | 2511.89    | *        |          |
| AP_bits          | CHEMBL1991188 | 0.680556 | 6309.57    | *        |          |
| TT_bits          | CHEMBL1990254 | 0.622222 | 2511.89    | *        |          |
| FP2              | CHEMBL1991188 | 0.790476 | 6309.57    | *        |          |
| hybridization    | CHEMBL1991188 | 0.728745 | 6309.57    | *        |          |
| substructure     | CHEMBL1991188 | 0.882353 | 6309.57    | *        |          |
| graph            | CHEMBL1991188 | 0.644860 | 6309.57    |          |          |
| pubchem          | CHEMBL1991188 | 0.951087 | 6309.57    | *        |          |
| cdk_maccs        | CHEMBL1991188 | 0.756098 | 6309.57    |          |          |
| klekota_roth     | CHEMBL1991188 | 0.809524 | 6309.57    | *        |          |

\*\*\* ki ACTIVITY \*\*\* value prediction  
based on 10 locally validated fgps ---> 4579.270



["TT\_bits", "substructure", "Pattern", "AP\_bits", "MFP1", "pubchem",  
"FP2", "FeatMFP1", "klekota\_roth", "hybridization"]

43 rank

Mitogen-activated protein kinase kinase kinase kinase 2 : Homo sapiens  
score: 7.984 on ChEMBL5330 based on 10 fingerprints

| Fingerprint type | Ligand        | Tanimoto | Similarity | activity | Valid | fg |
|------------------|---------------|----------|------------|----------|-------|----|
| FeatMFP1         | CHEMBL1991188 |          | 0.857143   | 6309.57  |       | *  |
| MFP1             | CHEMBL1991188 |          | 0.750000   | 6309.57  |       | *  |
| RDKit7           | CHEMBL1990254 |          | 0.716753   | 3981.07  |       |    |
| Pattern          | CHEMBL1990254 |          | 0.911950   | 3981.07  |       | *  |
| AP_bits          | CHEMBL1991188 |          | 0.680556   | 6309.57  |       | *  |
| TT_bits          | CHEMBL1990254 |          | 0.622222   | 3981.07  |       | *  |
| FP2              | CHEMBL1991188 |          | 0.790476   | 6309.57  |       | *  |
| hybridization    | CHEMBL1991188 |          | 0.728745   | 6309.57  |       | *  |
| substructure     | CHEMBL1991188 |          | 0.882353   | 6309.57  |       | *  |
| graph            | CHEMBL1991188 |          | 0.644860   | 6309.57  |       |    |
| pubchem          | CHEMBL1991188 |          | 0.951087   | 6309.57  |       | *  |
| cdk_maccs        | CHEMBL1991188 |          | 0.756098   | 6309.57  |       |    |
| klekota_roth     | CHEMBL1991188 |          | 0.809524   | 6309.57  |       | *  |

\*\*\* ki ACTIVITY \*\*\* value prediction

based on 10 locally validated fgps ---> 4857.933

["TT\_bits", "substructure", "Pattern", "AP\_bits", "MFP1", "pubchem",  
"FP2", "FeatMFP1", "klekota\_roth", "hybridization"]

44 rank

Cell division protein kinase 8 : Homo sapiens  
score: 7.435 on ChEMBL5719 based on 9 fingerprints

| Fingerprint type | Ligand        | Tanimoto | Similarity | activity | Valid | fg |
|------------------|---------------|----------|------------|----------|-------|----|
| FeatMFP1         | CHEMBL1994724 |          | 0.900000   | 3162.28  |       | *  |
| MFP1             | CHEMBL1994724 |          | 0.827586   | 3162.28  |       | *  |
| RDKit7           | CHEMBL1986143 |          | 0.688633   | 2511.89  |       |    |
| Pattern          | CHEMBL1986143 |          | 0.919003   | 2511.89  |       | *  |
| AP_bits          | CHEMBL1994724 |          | 0.620690   | 3162.28  |       | *  |
| TT_bits          | CHEMBL1994724 |          | 0.702128   | 3162.28  |       | *  |
| FP2              | CHEMBL1986143 |          | 0.676768   | 2511.89  |       |    |
| hybridization    | CHEMBL1994724 |          | 0.640569   | 3162.28  |       |    |
| substructure     | CHEMBL1994724 |          | 0.937500   | 3162.28  |       | *  |
| graph            | CHEMBL1997275 |          | 0.698925   | 251.19   |       |    |
| pubchem          | CHEMBL1994724 |          | 0.880829   | 3162.28  |       | *  |
| cdk_maccs        | CHEMBL1994724 |          | 0.837838   | 3162.28  |       | *  |
| klekota_roth     | CHEMBL1994724 |          | 0.809524   | 3162.28  |       | *  |

\*\*\* ki ACTIVITY \*\*\* value prediction

based on 9 locally validated fgps ---> 2940.331

["TT\_bits", "substructure", "Pattern", "MFP1", "pubchem", "AP\_bits",  
"FeatMFP1", "klekota\_roth", "cdk\_maccs"]

45 rank

G protein-coupled receptor kinase 5 : Homo sapiens  
score: 7.397 on ChEMBL5678 based on 9 fingerprints

| Fingerprint type | Ligand        | Tanimoto | Similarity | activity | Valid | fg |
|------------------|---------------|----------|------------|----------|-------|----|
| FeatMFP1         | CHEMBL1994724 |          | 0.900000   | 1000.00  |       | *  |
| MFP1             | CHEMBL1994724 |          | 0.827586   | 1000.00  |       | *  |
| RDKit7           | CHEMBL1994724 |          | 0.554632   | 1000.00  |       |    |
| Pattern          | CHEMBL2004159 |          | 0.875758   | 3981.07  |       | *  |
| AP_bits          | CHEMBL2004159 |          | 0.625483   | 3981.07  |       | *  |
| TT_bits          | CHEMBL1994724 |          | 0.702128   | 1000.00  |       | *  |
| FP2              | CHEMBL1994724 |          | 0.640625   | 1000.00  |       |    |
| hybridization    | CHEMBL1994724 |          | 0.640569   | 1000.00  |       |    |
| substructure     | CHEMBL1994724 |          | 0.937500   | 1000.00  |       | *  |

```

graph CHEMBL1986590 0.577778 3162.28
pubchem CHEMBL1994724 0.880829 1000.00 *
cdk_maccs CHEMBL1994724 0.837838 1000.00 *
klekota_roth CHEMBL1994724 0.809524 1000.00 *
*** ki ACTIVITY *** value prediction
based on 9 locally validated fgps ---> 1801.323
["TT_bits", "substructure", "Pattern", "MFP1", "pubchem", "AP_bits",
"FeatMFP1", "klekota_roth", "cdk_maccs"]

```

46 rank

Serine/threonine-protein kinase Aurora-A : Homo sapiens

score: 7.377 on CHEMBL4722 based on 9 fingerprints

| Fingerprint type | Ligand        | Tanimoto | Similarity | activity | Valid | fg |
|------------------|---------------|----------|------------|----------|-------|----|
| FeatMFP1         | CHEMBL1994724 |          | 0.900000   | 199.53   | *     |    |
| MFP1             | CHEMBL1994724 |          | 0.827586   | 199.53   | *     |    |
| RDKit7           | CHEMBL1994724 |          | 0.554632   | 199.53   |       |    |
| Pattern          | CHEMBL1994724 |          | 0.860795   | 199.53   | *     |    |
| AP_bits          | CHEMBL1994724 |          | 0.620690   | 199.53   | *     |    |
| TT_bits          | CHEMBL1994724 |          | 0.702128   | 199.53   | *     |    |
| FP2              | CHEMBL1994724 |          | 0.640625   | 199.53   |       |    |
| hybridization    | CHEMBL1994724 |          | 0.640569   | 199.53   |       |    |
| substructure     | CHEMBL1994724 |          | 0.937500   | 199.53   | *     |    |
| graph            | CHEMBL1965845 |          | 0.583333   | 63.10    |       |    |
| pubchem          | CHEMBL1994724 |          | 0.880829   | 199.53   | *     |    |
| cdk_maccs        | CHEMBL1994724 |          | 0.837838   | 199.53   | *     |    |
| klekota_roth     | CHEMBL1994724 |          | 0.809524   | 199.53   | *     |    |

```

*** ki ACTIVITY *** value prediction
based on 9 locally validated fgps ---> 295.853
["TT_bits", "substructure", "Pattern", "MFP1", "pubchem", "AP_bits",
"FeatMFP1", "klekota_roth", "cdk_maccs"]

```

47 rank

Activin receptor type-1 : Homo sapiens

score: 7.377 on CHEMBL5903 based on 9 fingerprints

| Fingerprint type | Ligand        | Tanimoto | Similarity | activity | Valid | fg |
|------------------|---------------|----------|------------|----------|-------|----|
| FeatMFP1         | CHEMBL1994724 |          | 0.900000   | 2511.89  | *     |    |
| MFP1             | CHEMBL1994724 |          | 0.827586   | 2511.89  | *     |    |
| RDKit7           | CHEMBL1994724 |          | 0.554632   | 2511.89  |       |    |
| Pattern          | CHEMBL1994724 |          | 0.860795   | 2511.89  | *     |    |
| AP_bits          | CHEMBL1994724 |          | 0.620690   | 2511.89  | *     |    |
| TT_bits          | CHEMBL1994724 |          | 0.702128   | 2511.89  | *     |    |
| FP2              | CHEMBL1994724 |          | 0.640625   | 2511.89  |       |    |
| hybridization    | CHEMBL1994724 |          | 0.640569   | 2511.89  |       |    |
| substructure     | CHEMBL1994724 |          | 0.937500   | 2511.89  | *     |    |
| graph            | CHEMBL1980329 |          | 0.563830   | 3162.28  |       |    |
| pubchem          | CHEMBL1994724 |          | 0.880829   | 2511.89  | *     |    |
| cdk_maccs        | CHEMBL1994724 |          | 0.837838   | 2511.89  | *     |    |
| klekota_roth     | CHEMBL1994724 |          | 0.809524   | 2511.89  | *     |    |

```

*** ki ACTIVITY *** value prediction
based on 9 locally validated fgps ---> 2546.777
["TT_bits", "substructure", "Pattern", "MFP1", "pubchem", "AP_bits",
"FeatMFP1", "klekota_roth", "cdk_maccs"]

```

48 rank

LIM domain kinase 1 : Homo sapiens

score: 7.268 on CHEMBL3836 based on 9 fingerprints

| Fingerprint type | Ligand        | Tanimoto | Similarity | activity | Valid | fg |
|------------------|---------------|----------|------------|----------|-------|----|
| FeatMFP1         | CHEMBL1999428 |          | 0.833333   | 7943.28  | *     |    |
| MFP1             | CHEMBL1999428 |          | 0.800000   | 7943.28  | *     |    |
| RDKit7           | CHEMBL1999428 |          | 0.785171   | 7943.28  | *     |    |

|               |               |          |         |   |
|---------------|---------------|----------|---------|---|
| Pattern       | CHEMBL1996931 | 0.901493 | 3162.28 | * |
| AP_bits       | CHEMBL1999428 | 0.768519 | 7943.28 | * |
| TT_bits       | CHEMBL1999428 | 0.756098 | 7943.28 | * |
| FP2           | CHEMBL1999428 | 0.783133 | 7943.28 | * |
| hybridization | CHEMBL1999428 | 0.651961 | 7943.28 |   |
| substructure  | CHEMBL1999428 | 0.933333 | 7943.28 | * |
| graph         | CHEMBL1999428 | 0.597561 | 7943.28 |   |
| pubchem       | CHEMBL1999428 | 0.817143 | 7943.28 |   |
| cdk_maccs     | CHEMBL1999428 | 0.709677 | 7943.28 |   |
| klekota_roth  | CHEMBL1999428 | 0.707317 | 7943.28 | * |

\*\*\* ki ACTIVITY \*\*\* value prediction  
 based on 9 locally validated fgps ---> 7266.786  
 ["TT\_bits", "substructure", "Pattern", "FP2", "MFP1", "klekota\_roth",  
 "AP\_bits", "FeatMFP1", "RDKit7"]

49 rank

Serine/threonine-protein kinase PLK3 : Homo sapiens

score: 7.267 on ChEMBL4897 based on 9 fingerprints

| Fingerprint type | Ligand        | Tanimoto | Similarity | activity | Valid fg |
|------------------|---------------|----------|------------|----------|----------|
| FeatMFP1         | CHEMBL1999428 | 0.833333 | 1995.26    | *        |          |
| MFP1             | CHEMBL1999428 | 0.800000 | 1995.26    | *        |          |
| RDKit7           | CHEMBL1999428 | 0.785171 | 1995.26    | *        |          |
| Pattern          | CHEMBL1999428 | 0.895899 | 1995.26    | *        |          |
| AP_bits          | CHEMBL1999428 | 0.768519 | 1995.26    | *        |          |
| TT_bits          | CHEMBL1999428 | 0.756098 | 1995.26    | *        |          |
| FP2              | CHEMBL1999428 | 0.783133 | 1995.26    | *        |          |
| hybridization    | CHEMBL1999428 | 0.651961 | 1995.26    |          |          |
| substructure     | CHEMBL2005375 | 0.937500 | 12.59      | *        |          |
| graph            | CHEMBL1999428 | 0.597561 | 1995.26    |          |          |
| pubchem          | CHEMBL1999428 | 0.817143 | 1995.26    |          |          |
| cdk_maccs        | CHEMBL1999428 | 0.709677 | 1995.26    |          |          |
| klekota_roth     | CHEMBL1999428 | 0.707317 | 1995.26    | *        |          |

\*\*\* ki ACTIVITY \*\*\* value prediction  
 based on 9 locally validated fgps ---> 1884.866  
 ["TT\_bits", "substructure", "Pattern", "FP2", "MFP1", "klekota\_roth",  
 "AP\_bits", "FeatMFP1", "RDKit7"]

50 rank

Vascular endothelial growth factor receptor 1 : Homo sapiens

score: 7.263 on ChEMBL1868 based on 9 fingerprints

| Fingerprint type | Ligand        | Tanimoto | Similarity | activity | Valid fg |
|------------------|---------------|----------|------------|----------|----------|
| FeatMFP1         | CHEMBL1999428 | 0.833333 | 158.49     | *        |          |
| MFP1             | CHEMBL1999428 | 0.800000 | 158.49     | *        |          |
| RDKit7           | CHEMBL1999428 | 0.785171 | 158.49     | *        |          |
| Pattern          | CHEMBL1999428 | 0.895899 | 158.49     | *        |          |
| AP_bits          | CHEMBL1999428 | 0.768519 | 158.49     | *        |          |
| TT_bits          | CHEMBL1999428 | 0.756098 | 158.49     | *        |          |
| FP2              | CHEMBL1999428 | 0.783133 | 158.49     | *        |          |
| hybridization    | CHEMBL1999428 | 0.651961 | 158.49     |          |          |
| substructure     | CHEMBL1999428 | 0.933333 | 158.49     | *        |          |
| graph            | CHEMBL1999428 | 0.597561 | 158.49     |          |          |
| pubchem          | CHEMBL1999428 | 0.817143 | 158.49     |          |          |
| cdk_maccs        | CHEMBL1999428 | 0.709677 | 158.49     |          |          |
| klekota_roth     | CHEMBL1999428 | 0.707317 | 158.49     | *        |          |

\*\*\* ki ACTIVITY \*\*\* value prediction  
 based on 9 locally validated fgps ---> 319.984  
 ["TT\_bits", "substructure", "Pattern", "FP2", "MFP1", "klekota\_roth",  
 "AP\_bits", "FeatMFP1", "RDKit7"]

51 rank

Tyrosine-protein kinase receptor FLT3 : Homo sapiens

score: 7.263 on ChEMBL1974 based on 9 fingerprints

| Fingerprint type | Ligand        | Tanimoto | Similarity | activity | Valid | fg |
|------------------|---------------|----------|------------|----------|-------|----|
| FeatMFP1         | CHEMBL1999428 |          | 0.833333   | 316.23   |       | *  |
| MFP1             | CHEMBL1999428 |          | 0.800000   | 316.23   |       | *  |
| RDKit7           | CHEMBL1999428 |          | 0.785171   | 316.23   |       | *  |
| Pattern          | CHEMBL1999428 |          | 0.895899   | 316.23   |       | *  |
| AP_bits          | CHEMBL1999428 |          | 0.768519   | 316.23   |       | *  |
| TT_bits          | CHEMBL1999428 |          | 0.756098   | 316.23   |       | *  |
| FP2              | CHEMBL1999428 |          | 0.783133   | 316.23   |       | *  |
| hybridization    | CHEMBL1999428 |          | 0.651961   | 316.23   |       |    |
| substructure     | CHEMBL1999428 |          | 0.933333   | 316.23   |       | *  |
| graph            | CHEMBL1997275 |          | 0.698925   | 1584.89  |       |    |
| pubchem          | CHEMBL1997275 |          | 0.842640   | 1584.89  |       |    |
| cdk_maccs        | CHEMBL1982924 |          | 0.731707   | 398.11   |       |    |
| klekota_roth     | CHEMBL1999428 |          | 0.707317   | 316.23   |       | *  |

\*\*\* ki ACTIVITY \*\*\* value prediction

based on 9 locally validated fgps ---> 320.632

["TT\_bits", "substructure", "Pattern", "FP2", "MFP1", "klekota\_roth", "AP\_bits", "FeatMFP1", "RDKit7"]

52 rank

Vascular endothelial growth factor receptor 2 : Homo sapiens

score: 7.263 on ChEMBL279 based on 9 fingerprints

| Fingerprint type | Ligand        | Tanimoto | Similarity | activity | Valid | fg |
|------------------|---------------|----------|------------|----------|-------|----|
| FeatMFP1         | CHEMBL1999428 |          | 0.833333   | 6309.57  |       | *  |
| MFP1             | CHEMBL1999428 |          | 0.800000   | 6309.57  |       | *  |
| RDKit7           | CHEMBL1999428 |          | 0.785171   | 6309.57  |       | *  |
| Pattern          | CHEMBL1999428 |          | 0.895899   | 6309.57  |       | *  |
| AP_bits          | CHEMBL1999428 |          | 0.768519   | 6309.57  |       | *  |
| TT_bits          | CHEMBL1999428 |          | 0.756098   | 6309.57  |       | *  |
| FP2              | CHEMBL1999428 |          | 0.783133   | 6309.57  |       | *  |
| hybridization    | CHEMBL1999428 |          | 0.651961   | 6309.57  |       |    |
| substructure     | CHEMBL1999428 |          | 0.933333   | 6309.57  |       | *  |
| graph            | CHEMBL1997275 |          | 0.698925   | 2511.89  |       |    |
| pubchem          | CHEMBL1997275 |          | 0.842640   | 2511.89  |       |    |
| cdk_maccs        | CHEMBL1999428 |          | 0.709677   | 6309.57  |       |    |
| klekota_roth     | CHEMBL1999428 |          | 0.707317   | 6309.57  |       | *  |

\*\*\* ki ACTIVITY \*\*\* value prediction

based on 9 locally validated fgps ---> 6184.382

["TT\_bits", "substructure", "Pattern", "FP2", "MFP1", "klekota\_roth", "AP\_bits", "FeatMFP1", "RDKit7"]

53 rank

Macrophage-stimulating protein receptor : Homo sapiens

score: 6.864 on ChEMBL2689 based on 8 fingerprints

| Fingerprint type | Ligand        | Tanimoto | Similarity | activity | Valid | fg |
|------------------|---------------|----------|------------|----------|-------|----|
| FeatMFP1         | CHEMBL2003514 |          | 0.947368   | 398.11   |       | *  |
| MFP1             | CHEMBL2003514 |          | 0.925926   | 398.11   |       | *  |
| RDKit7           | CHEMBL2003514 |          | 0.575967   | 398.11   |       |    |
| Pattern          | CHEMBL2003514 |          | 0.957576   | 398.11   |       | *  |
| AP_bits          | CHEMBL2003514 |          | 0.804979   | 398.11   |       | *  |
| TT_bits          | CHEMBL2003514 |          | 0.620000   | 398.11   |       | *  |
| FP2              | CHEMBL2003514 |          | 0.640351   | 398.11   |       |    |
| hybridization    | CHEMBL2003514 |          | 0.593625   | 398.11   |       |    |
| substructure     | CHEMBL1984296 |          | 0.875000   | 3981.07  |       | *  |
| graph            | CHEMBL1997275 |          | 0.698925   | 2511.89  |       |    |
| pubchem          | CHEMBL1997275 |          | 0.842640   | 2511.89  |       |    |
| cdk_maccs        | CHEMBL2003514 |          | 0.861111   | 398.11   |       | *  |
| klekota_roth     | CHEMBL2003514 |          | 0.871795   | 398.11   |       | *  |

\*\*\* ki ACTIVITY \*\*\* value prediction  
 based on 8 locally validated fgps ---> 622.045  
 ["TT\_bits", "substructure", "Pattern", "MFP1", "AP\_bits", "FeatMFP1",  
 "klekota\_roth", "cdk\_maccs"]

54 rank

Serine/threonine-protein kinase 17A : Homo sapiens

score: 6.301 on ChEMBL4525 based on 8 fingerprints

| Fingerprint type | Ligand        | Tanimoto | Similarity | activity | Valid | fg |
|------------------|---------------|----------|------------|----------|-------|----|
| FeatMFP1         | ChEMBL1984633 |          | 0.947368   | 3162.28  |       | *  |
| MFP1             | ChEMBL1984633 |          | 0.774194   | 3162.28  |       | *  |
| RDKit7           | ChEMBL1990254 |          | 0.716753   | 1584.89  |       |    |
| Pattern          | ChEMBL1990254 |          | 0.911950   | 1584.89  |       | *  |
| AP_bits          | ChEMBL1990254 |          | 0.600000   | 1584.89  |       | *  |
| TT_bits          | ChEMBL1990254 |          | 0.622222   | 1584.89  |       | *  |
| FP2              | ChEMBL1990254 |          | 0.706522   | 1584.89  |       | *  |
| hybridization    | ChEMBL1990254 |          | 0.605381   | 1584.89  |       |    |
| substructure     | ChEMBL1978099 |          | 0.823529   | 1000.00  |       |    |
| graph            | ChEMBL1965845 |          | 0.583333   | 1258.93  |       |    |
| pubchem          | ChEMBL1991356 |          | 0.866667   | 630.96   |       | *  |
| cdk_maccs        | ChEMBL1984633 |          | 0.775000   | 3162.28  |       |    |
| klekota_roth     | ChEMBL1984633 |          | 0.871795   | 3162.28  |       | *  |

\*\*\* ki ACTIVITY \*\*\* value prediction  
 based on 8 locally validated fgps ---> 2246.329  
 ["TT\_bits", "Pattern", "AP\_bits", "MFP1", "pubchem", "FP2", "FeatMFP1",  
 "klekota\_roth"]

55 rank

Serine/threonine-protein kinase PIM1 : Homo sapiens

score: 5.872 on ChEMBL2147 based on 8 fingerprints

| Fingerprint type | Ligand        | Tanimoto | Similarity | activity | Valid | fg |
|------------------|---------------|----------|------------|----------|-------|----|
| FeatMFP1         | ChEMBL1990254 |          | 0.700000   | 3981.07  |       |    |
| MFP1             | ChEMBL1997534 |          | 0.594595   | 3162.28  |       | *  |
| RDKit7           | ChEMBL1990254 |          | 0.716753   | 3981.07  |       |    |
| Pattern          | ChEMBL1990254 |          | 0.911950   | 3981.07  |       | *  |
| AP_bits          | ChEMBL1990254 |          | 0.600000   | 3981.07  |       | *  |
| TT_bits          | ChEMBL1990254 |          | 0.622222   | 3981.07  |       | *  |
| FP2              | ChEMBL1990254 |          | 0.706522   | 3981.07  |       | *  |
| hybridization    | ChEMBL1990254 |          | 0.605381   | 3981.07  |       |    |
| substructure     | ChEMBL1997534 |          | 0.882353   | 3162.28  |       | *  |
| graph            | ChEMBL272476  |          | 0.654762   | 4500.00  |       |    |
| pubchem          | ChEMBL1991356 |          | 0.866667   | 501.19   |       | *  |
| cdk_maccs        | ChEMBL1991356 |          | 0.731707   | 501.19   |       |    |
| klekota_roth     | ChEMBL1997534 |          | 0.687500   | 3162.28  |       | *  |

\*\*\* ki ACTIVITY \*\*\* value prediction  
 based on 8 locally validated fgps ---> 3289.999  
 ["TT\_bits", "substructure", "Pattern", "AP\_bits", "MFP1", "pubchem",  
 "FP2", "klekota\_roth"]

56 rank

Casein kinase I gamma 1 : Homo sapiens

score: 5.559 on ChEMBL2426 based on 7 fingerprints

| Fingerprint type | Ligand        | Tanimoto | Similarity | activity | Valid | fg |
|------------------|---------------|----------|------------|----------|-------|----|
| FeatMFP1         | ChEMBL1984633 |          | 0.947368   | 5011.87  |       | *  |
| MFP1             | ChEMBL1984633 |          | 0.774194   | 5011.87  |       | *  |
| RDKit7           | ChEMBL1996931 |          | 0.517442   | 630.96   |       |    |
| Pattern          | ChEMBL1996931 |          | 0.901493   | 630.96   |       | *  |
| AP_bits          | ChEMBL1984633 |          | 0.557971   | 5011.87  |       | *  |
| TT_bits          | ChEMBL1984633 |          | 0.568627   | 5011.87  |       | *  |
| FP2              | ChEMBL1996931 |          | 0.556522   | 630.96   |       |    |

```

hybridization CHEMBL1984633 0.472727 5011.87
substructure CHEMBL2005375 0.937500 1995.26 *
graph CHEMBL1996831 0.566265 1584.89
pubchem CHEMBL1982924 0.804762 1000.00
cdk_maccs CHEMBL1984633 0.775000 5011.87
klekota_roth CHEMBL1984633 0.871795 5011.87 *
*** ki ACTIVITY *** value prediction
based on 7 locally validated fgps ---> 3886.443
["TT_bits", "substructure", "Pattern", "MFP1", "AP_bits", "FeatMFP1",
"klekota_roth"]

```

57 rank

Protein kinase C nu : Homo sapiens

score: 5.060 on CHEMBL2595 based on 7 fingerprints

| Fingerprint type | Ligand        | Tanimoto | Similarity | activity | Valid fg |
|------------------|---------------|----------|------------|----------|----------|
| FeatMFP1         | CHEMBL1990254 |          | 0.700000   | 2511.89  |          |
| MFP1             | CHEMBL1997534 |          | 0.594595   | 794.33   | *        |
| RDKit7           | CHEMBL1990254 |          | 0.716753   | 2511.89  |          |
| Pattern          | CHEMBL1990254 |          | 0.911950   | 2511.89  | *        |
| AP_bits          | CHEMBL1990254 |          | 0.600000   | 2511.89  | *        |
| TT_bits          | CHEMBL1990254 |          | 0.622222   | 2511.89  | *        |
| FP2              | CHEMBL1990254 |          | 0.706522   | 2511.89  | *        |
| hybridization    | CHEMBL1990254 |          | 0.605381   | 2511.89  |          |
| substructure     | CHEMBL2005375 |          | 0.937500   | 1995.26  | *        |
| graph            | CHEMBL1997275 |          | 0.698925   | 794.33   |          |
| pubchem          | CHEMBL1997275 |          | 0.842640   | 794.33   |          |
| cdk_maccs        | CHEMBL1982924 |          | 0.731707   | 2511.89  |          |
| klekota_roth     | CHEMBL1997534 |          | 0.687500   | 794.33   | *        |

```

*** ki ACTIVITY *** value prediction
based on 7 locally validated fgps ---> 1864.173
["TT_bits", "substructure", "Pattern", "AP_bits", "MFP1", "FP2",
"klekota_roth"]

```

58 rank

CaM kinase II delta : Homo sapiens

score: 5.060 on CHEMBL2801 based on 7 fingerprints

| Fingerprint type | Ligand        | Tanimoto | Similarity | activity | Valid fg |
|------------------|---------------|----------|------------|----------|----------|
| FeatMFP1         | CHEMBL1990254 |          | 0.700000   | 2511.89  |          |
| MFP1             | CHEMBL1997534 |          | 0.594595   | 5011.87  | *        |
| RDKit7           | CHEMBL1990254 |          | 0.716753   | 2511.89  |          |
| Pattern          | CHEMBL1990254 |          | 0.911950   | 2511.89  | *        |
| AP_bits          | CHEMBL1990254 |          | 0.600000   | 2511.89  | *        |
| TT_bits          | CHEMBL1990254 |          | 0.622222   | 2511.89  | *        |
| FP2              | CHEMBL1990254 |          | 0.706522   | 2511.89  | *        |
| hybridization    | CHEMBL1990254 |          | 0.605381   | 2511.89  |          |
| substructure     | CHEMBL2005375 |          | 0.937500   | 5011.87  | *        |
| graph            | CHEMBL2002649 |          | 0.581197   | 1584.89  |          |
| pubchem          | CHEMBL1982924 |          | 0.804762   | 1258.93  |          |
| cdk_maccs        | CHEMBL1982924 |          | 0.731707   | 1258.93  |          |
| klekota_roth     | CHEMBL1997534 |          | 0.687500   | 5011.87  | *        |

```

*** ki ACTIVITY *** value prediction
based on 7 locally validated fgps ---> 3583.310
["TT_bits", "substructure", "Pattern", "AP_bits", "MFP1", "FP2",
"klekota_roth"]

```

59 rank

CaM kinase II gamma : Homo sapiens

score: 5.060 on CHEMBL3829 based on 7 fingerprints

| Fingerprint type | Ligand        | Tanimoto | Similarity | activity | Valid fg |
|------------------|---------------|----------|------------|----------|----------|
| FeatMFP1         | CHEMBL1990254 |          | 0.700000   | 3162.28  |          |

|               |               |          |         |   |
|---------------|---------------|----------|---------|---|
| MFP1          | CHEMBL1997534 | 0.594595 | 5011.87 | * |
| RDKit7        | CHEMBL1990254 | 0.716753 | 3162.28 |   |
| Pattern       | CHEMBL1990254 | 0.911950 | 3162.28 | * |
| AP_bits       | CHEMBL1990254 | 0.600000 | 3162.28 | * |
| TT_bits       | CHEMBL1990254 | 0.622222 | 3162.28 | * |
| FP2           | CHEMBL1990254 | 0.706522 | 3162.28 | * |
| hybridization | CHEMBL1990254 | 0.605381 | 3162.28 |   |
| substructure  | CHEMBL2005375 | 0.937500 | 2511.89 | * |
| graph         | CHEMBL1965845 | 0.583333 | 5011.87 |   |
| pubchem       | CHEMBL1982924 | 0.804762 | 630.96  |   |
| cdk_maccs     | CHEMBL1982924 | 0.731707 | 630.96  |   |
| klekota_roth  | CHEMBL1997534 | 0.687500 | 5011.87 | * |

\*\*\* ki ACTIVITY \*\*\* value prediction

based on 7 locally validated fgps ---> 3770.980

["TT\_bits", "substructure", "Pattern", "AP\_bits", "MFP1", "FP2", "klekota\_roth"]

60 rank

Serine/threonine-protein kinase D2 : Homo sapiens

score: 5.060 on ChEMBL4900 based on 7 fingerprints

| Fingerprint type | Ligand        | Tanimoto | Similarity | activity | Valid fg |
|------------------|---------------|----------|------------|----------|----------|
| FeatMFP1         | CHEMBL1990254 | 0.700000 | 1258.93    |          |          |
| MFP1             | CHEMBL1997534 | 0.594595 | 398.11     |          | *        |
| RDKit7           | CHEMBL1990254 | 0.716753 | 1258.93    |          |          |
| Pattern          | CHEMBL1990254 | 0.911950 | 1258.93    |          | *        |
| AP_bits          | CHEMBL1990254 | 0.600000 | 1258.93    |          | *        |
| TT_bits          | CHEMBL1990254 | 0.622222 | 1258.93    |          | *        |
| FP2              | CHEMBL1990254 | 0.706522 | 1258.93    |          | *        |
| hybridization    | CHEMBL1990254 | 0.605381 | 1258.93    |          |          |
| substructure     | CHEMBL2005375 | 0.937500 | 5011.87    |          | *        |
| graph            | CHEMBL1965845 | 0.583333 | 501.19     |          |          |
| pubchem          | CHEMBL1982924 | 0.804762 | 1995.26    |          |          |
| cdk_maccs        | CHEMBL1982924 | 0.731707 | 1995.26    |          |          |
| klekota_roth     | CHEMBL1997534 | 0.687500 | 398.11     |          | *        |

\*\*\* ki ACTIVITY \*\*\* value prediction

based on 7 locally validated fgps ---> 1229.548

["TT\_bits", "substructure", "Pattern", "AP\_bits", "MFP1", "FP2", "klekota\_roth"]

61 rank

Mitogen-activated protein kinase kinase kinase kinase 5 : Homo sapiens

score: 5.022 on ChEMBL4852 based on 7 fingerprints

| Fingerprint type | Ligand        | Tanimoto | Similarity | activity | Valid fg |
|------------------|---------------|----------|------------|----------|----------|
| FeatMFP1         | CHEMBL1990254 | 0.700000 | 2511.89    |          |          |
| MFP1             | CHEMBL1997534 | 0.594595 | 316.23     |          | *        |
| RDKit7           | CHEMBL1990254 | 0.716753 | 2511.89    |          |          |
| Pattern          | CHEMBL1990254 | 0.911950 | 2511.89    |          | *        |
| AP_bits          | CHEMBL1990254 | 0.600000 | 2511.89    |          | *        |
| TT_bits          | CHEMBL1990254 | 0.622222 | 2511.89    |          | *        |
| FP2              | CHEMBL1977135 | 0.722892 | 7943.28    |          | *        |
| hybridization    | CHEMBL1977135 | 0.627451 | 7943.28    |          |          |
| substructure     | CHEMBL1997534 | 0.882353 | 316.23     |          | *        |
| graph            | CHEMBL1977135 | 0.597561 | 7943.28    |          |          |
| pubchem          | CHEMBL1982924 | 0.804762 | 2511.89    |          |          |
| cdk_maccs        | CHEMBL1982924 | 0.731707 | 2511.89    |          |          |
| klekota_roth     | CHEMBL1997534 | 0.687500 | 316.23     |          | *        |

\*\*\* ki ACTIVITY \*\*\* value prediction

based on 7 locally validated fgps ---> 2494.818

["TT\_bits", "substructure", "Pattern", "AP\_bits", "MFP1", "FP2", "klekota\_roth"]

62 rank

CaM kinase II beta : Homo sapiens

score: 5.005 on ChEMBL4121 based on 7 fingerprints

| Fingerprint type | Ligand        | Tanimoto | Similarity | activity | Valid fg |
|------------------|---------------|----------|------------|----------|----------|
| FeatMFP1         | CHEMBL1990254 |          | 0.700000   | 7943.28  |          |
| MFP1             | CHEMBL1997534 |          | 0.594595   | 3162.28  | *        |
| RDKit7           | CHEMBL1990254 |          | 0.716753   | 7943.28  |          |
| Pattern          | CHEMBL1990254 |          | 0.911950   | 7943.28  | *        |
| AP_bits          | CHEMBL1990254 |          | 0.600000   | 7943.28  | *        |
| TT_bits          | CHEMBL1990254 |          | 0.622222   | 7943.28  | *        |
| FP2              | CHEMBL1990254 |          | 0.706522   | 7943.28  | *        |
| hybridization    | CHEMBL1990254 |          | 0.605381   | 7943.28  |          |
| substructure     | CHEMBL1997534 |          | 0.882353   | 3162.28  | *        |
| graph            | CHEMBL1965845 |          | 0.583333   | 7943.28  |          |
| pubchem          | CHEMBL1982924 |          | 0.804762   | 1584.89  |          |
| cdk_maccs        | CHEMBL1982924 |          | 0.731707   | 1584.89  |          |
| klekota_roth     | CHEMBL1997534 |          | 0.687500   | 3162.28  | *        |

\*\*\* ki ACTIVITY \*\*\* value prediction

based on 7 locally validated fgps ---> 5782.081

["TT\_bits", "substructure", "Pattern", "AP\_bits", "MFP1", "FP2", "klekota\_roth"]

63 rank

MAP kinase signal-integrating kinase 2 : Homo sapiens

score: 4.590 on ChEMBL4204 based on 6 fingerprints

| Fingerprint type | Ligand        | Tanimoto | Similarity | activity | Valid fg |
|------------------|---------------|----------|------------|----------|----------|
| FeatMFP1         | CHEMBL1990254 |          | 0.700000   | 3981.07  |          |
| MFP1             | CHEMBL1990254 |          | 0.566667   | 3981.07  |          |
| RDKit7           | CHEMBL1990254 |          | 0.716753   | 3981.07  |          |
| Pattern          | CHEMBL1990254 |          | 0.911950   | 3981.07  | *        |
| AP_bits          | CHEMBL1990254 |          | 0.600000   | 3981.07  | *        |
| TT_bits          | CHEMBL1990254 |          | 0.622222   | 3981.07  | *        |
| FP2              | CHEMBL1990254 |          | 0.706522   | 3981.07  | *        |
| hybridization    | CHEMBL1990254 |          | 0.605381   | 3981.07  |          |
| substructure     | CHEMBL3632744 |          | 0.882353   | 18.00    | *        |
| graph            | CHEMBL1965845 |          | 0.583333   | 630.96   |          |
| pubchem          | CHEMBL1991356 |          | 0.866667   | 3981.07  | *        |
| cdk_maccs        | CHEMBL1982924 |          | 0.731707   | 1584.89  |          |
| klekota_roth     | CHEMBL1990254 |          | 0.595238   | 3981.07  |          |

\*\*\* ki ACTIVITY \*\*\* value prediction

based on 6 locally validated fgps ---> 3320.558

["TT\_bits", "substructure", "Pattern", "AP\_bits", "pubchem", "FP2"]

64 rank

Casein kinase I delta : Homo sapiens

score: 4.582 on ChEMBL2828 based on 6 fingerprints

| Fingerprint type | Ligand        | Tanimoto | Similarity | activity | Valid fg |
|------------------|---------------|----------|------------|----------|----------|
| FeatMFP1         | CHEMBL1990254 |          | 0.700000   | 1000.00  |          |
| MFP1             | CHEMBL1990254 |          | 0.566667   | 1000.00  |          |
| RDKit7           | CHEMBL1990254 |          | 0.716753   | 1000.00  |          |
| Pattern          | CHEMBL1990254 |          | 0.911950   | 1000.00  | *        |
| AP_bits          | CHEMBL1990254 |          | 0.600000   | 1000.00  | *        |
| TT_bits          | CHEMBL1990254 |          | 0.622222   | 1000.00  | *        |
| FP2              | CHEMBL1990254 |          | 0.706522   | 1000.00  | *        |
| hybridization    | CHEMBL1990254 |          | 0.605381   | 1000.00  |          |
| substructure     | CHEMBL1969264 |          | 0.875000   | 1258.93  | *        |
| graph            | CHEMBL2002649 |          | 0.581197   | 3162.28  |          |
| pubchem          | CHEMBL1991356 |          | 0.866667   | 158.49   | *        |
| cdk_maccs        | CHEMBL1982924 |          | 0.731707   | 3981.07  |          |



```

klekota_roth CHEMBL1990254          0.595238    1000.00
*** ki ACTIVITY *** value prediction
based on 6 locally validated fgps ---> 1129.748
["TT_bits", "substructure", "Pattern", "AP_bits", "pubchem", "FP2"]

```

65 rank

Cytochrome P450 3A4 : Homo sapiens

score: 3.876 on ChEMBL340 based on 5 fingerprints

| Fingerprint type | Ligand        | Tanimoto | Similarity | activity | Valid fg |
|------------------|---------------|----------|------------|----------|----------|
| FeatMFP1         | CHEMBL3338848 |          | 0.695652   | 5600.0   |          |
| MFP1             | CHEMBL2152014 |          | 0.593750   | 540.0    | *        |
| RDKit7           | CHEMBL3338848 |          | 0.334451   | 5600.0   |          |
| Pattern          | CHEMBL1743350 |          | 0.829851   | 2600.0   |          |
| AP_bits          | CHEMBL2152010 |          | 0.530534   | 3100.0   | *        |
| TT_bits          | CHEMBL2152014 |          | 0.354839   | 540.0    |          |
| FP2              | CHEMBL2152014 |          | 0.488189   | 540.0    |          |
| hybridization    | CHEMBL3338848 |          | 0.433702   | 5600.0   |          |
| substructure     | CHEMBL3338848 |          | 1.000000   | 5600.0   | *        |
| graph            | CHEMBL2152010 |          | 0.727273   | 3100.0   |          |
| pubchem          | CHEMBL2152014 |          | 0.869110   | 540.0    | *        |
| cdk_maccs        | CHEMBL2152010 |          | 0.882353   | 3100.0   | *        |
| klekota_roth     | CHEMBL2152014 |          | 0.307692   | 540.0    |          |

\*\*\* ki ACTIVITY \*\*\* value prediction

based on 5 locally validated fgps ---> 4783.422

["AP\_bits", "cdk\_maccs", "MFP1", "substructure", "pubchem"]

66 rank

Neurokinin 3 receptor : Homo sapiens

score: 3.739 on ChEMBL4429 based on 5 fingerprints

| Fingerprint type | Ligand        | Tanimoto | Similarity | activity | Valid fg |
|------------------|---------------|----------|------------|----------|----------|
| FeatMFP1         | CHEMBL2113673 |          | 0.772727   | 1.80     | *        |
| MFP1             | CHEMBL297736  |          | 0.625000   | 57.00    | *        |
| RDKit7           | CHEMBL1277075 |          | 0.462779   | 158.49   |          |
| Pattern          | CHEMBL51352   |          | 0.754386   | 355.00   |          |
| AP_bits          | CHEMBL50291   |          | 0.550314   | 666.00   | *        |
| TT_bits          | CHEMBL1277075 |          | 0.385965   | 158.49   |          |
| FP2              | CHEMBL51120   |          | 0.567797   | 870.00   |          |
| hybridization    | CHEMBL10295   |          | 0.630522   | 1144.00  |          |
| substructure     | CHEMBL10536   |          | 0.933333   | 295.00   | *        |
| graph            | CHEMBL10079   |          | 0.730337   | 13.80    |          |
| pubchem          | CHEMBL50742   |          | 0.826531   | 919.00   |          |
| cdk_maccs        | CHEMBL53699   |          | 0.857143   | 1671.00  | *        |
| klekota_roth     | CHEMBL274763  |          | 0.480769   | 251.19   |          |

\*\*\* ki ACTIVITY \*\*\* value prediction

based on 5 locally validated fgps ---> 752.461

["FeatMFP1", "AP\_bits", "MFP1", "substructure", "cdk\_maccs"]

67 rank

BR serine/threonine-protein kinase 1 : Homo sapiens

score: 3.719 on ChEMBL5650 based on 5 fingerprints

| Fingerprint type | Ligand        | Tanimoto | Similarity | activity | Valid fg |
|------------------|---------------|----------|------------|----------|----------|
| FeatMFP1         | CHEMBL1990254 |          | 0.700000   | 398.11   |          |
| MFP1             | CHEMBL1974288 |          | 0.586207   | 5011.87  |          |
| RDKit7           | CHEMBL1990254 |          | 0.716753   | 398.11   |          |
| Pattern          | CHEMBL1974288 |          | 0.912500   | 5011.87  | *        |
| AP_bits          | CHEMBL1990254 |          | 0.600000   | 398.11   | *        |
| TT_bits          | CHEMBL1974288 |          | 0.622222   | 5011.87  | *        |
| FP2              | CHEMBL1974288 |          | 0.709677   | 5011.87  | *        |
| hybridization    | CHEMBL1990254 |          | 0.605381   | 398.11   |          |
| substructure     | CHEMBL1982924 |          | 0.875000   | 6309.57  | *        |

|              |               |          |         |
|--------------|---------------|----------|---------|
| graph        | CHEMBL1965845 | 0.583333 | 1584.89 |
| pubchem      | CHEMBL1974288 | 0.824176 | 5011.87 |
| cdk_maccs    | CHEMBL1982924 | 0.731707 | 6309.57 |
| klekota_roth | CHEMBL1990254 | 0.595238 | 398.11  |

\*\*\* ki ACTIVITY \*\*\* value prediction

based on 5 locally validated fgps ---> 3789.103

["Pattern", "FP2", "TT\_bits", "substructure", "AP\_bits"]

68 rank

Casein kinase I gamma 2 : Homo sapiens

score: 3.716 on ChEMBL2543 based on 5 fingerprints

| Fingerprint type | Ligand        | Tanimoto | Similarity | activity | Valid fg |
|------------------|---------------|----------|------------|----------|----------|
| FeatMFP1         | CHEMBL1990254 |          | 0.700000   | 2511.89  |          |
| MFP1             | CHEMBL1990254 |          | 0.566667   | 2511.89  |          |
| RDKit7           | CHEMBL1990254 |          | 0.716753   | 2511.89  |          |
| Pattern          | CHEMBL1990254 |          | 0.911950   | 2511.89  | *        |
| AP_bits          | CHEMBL1990254 |          | 0.600000   | 2511.89  | *        |
| TT_bits          | CHEMBL1990254 |          | 0.622222   | 2511.89  | *        |
| FP2              | CHEMBL1990254 |          | 0.706522   | 2511.89  | *        |
| hybridization    | CHEMBL1990254 |          | 0.605381   | 2511.89  |          |
| substructure     | CHEMBL1982924 |          | 0.875000   | 6309.57  | *        |
| graph            | CHEMBL2007064 |          | 0.567010   | 6309.57  |          |
| pubchem          | CHEMBL1982924 |          | 0.804762   | 6309.57  |          |
| cdk_maccs        | CHEMBL1982924 |          | 0.731707   | 6309.57  |          |
| klekota_roth     | CHEMBL1990254 |          | 0.595238   | 2511.89  |          |

\*\*\* ki ACTIVITY \*\*\* value prediction

based on 5 locally validated fgps ---> 3271.426

["Pattern", "FP2", "TT\_bits", "substructure", "AP\_bits"]

69 rank

Cyclin-dependent kinase 9 : Homo sapiens

score: 3.716 on ChEMBL3116 based on 5 fingerprints

| Fingerprint type | Ligand        | Tanimoto | Similarity | activity | Valid fg |
|------------------|---------------|----------|------------|----------|----------|
| FeatMFP1         | CHEMBL1990254 |          | 0.700000   | 158.49   |          |
| MFP1             | CHEMBL1990254 |          | 0.566667   | 158.49   |          |
| RDKit7           | CHEMBL1990254 |          | 0.716753   | 158.49   |          |
| Pattern          | CHEMBL1990254 |          | 0.911950   | 158.49   | *        |
| AP_bits          | CHEMBL1990254 |          | 0.600000   | 158.49   | *        |
| TT_bits          | CHEMBL1990254 |          | 0.622222   | 158.49   | *        |
| FP2              | CHEMBL1990254 |          | 0.706522   | 158.49   | *        |
| hybridization    | CHEMBL1990254 |          | 0.605381   | 158.49   |          |
| substructure     | CHEMBL1984296 |          | 0.875000   | 398.11   | *        |
| graph            | CHEMBL2002649 |          | 0.581197   | 501.19   |          |
| pubchem          | CHEMBL1990254 |          | 0.802260   | 158.49   |          |
| cdk_maccs        | CHEMBL2002649 |          | 0.613636   | 501.19   |          |
| klekota_roth     | CHEMBL1990254 |          | 0.595238   | 158.49   |          |

\*\*\* ki ACTIVITY \*\*\* value prediction

based on 5 locally validated fgps ---> 206.414

["Pattern", "FP2", "TT\_bits", "substructure", "AP\_bits"]

70 rank

Interleukin-1 receptor-associated kinase 4 : Homo sapiens

score: 3.716 on ChEMBL3778 based on 5 fingerprints

| Fingerprint type | Ligand        | Tanimoto | Similarity | activity | Valid fg |
|------------------|---------------|----------|------------|----------|----------|
| FeatMFP1         | CHEMBL1990254 |          | 0.700000   | 10000.00 |          |
| MFP1             | CHEMBL1990254 |          | 0.566667   | 10000.00 |          |
| RDKit7           | CHEMBL1990254 |          | 0.716753   | 10000.00 |          |
| Pattern          | CHEMBL1990254 |          | 0.911950   | 10000.00 | *        |
| AP_bits          | CHEMBL1990254 |          | 0.600000   | 10000.00 | *        |
| TT_bits          | CHEMBL1990254 |          | 0.622222   | 10000.00 | *        |

|               |               |          |          |   |
|---------------|---------------|----------|----------|---|
| FP2           | CHEMBL1990254 | 0.706522 | 10000.00 | * |
| hybridization | CHEMBL1990254 | 0.605381 | 10000.00 |   |
| substructure  | CHEMBL1982924 | 0.875000 | 2511.89  | * |
| graph         | CHEMBL1965845 | 0.583333 | 794.33   |   |
| pubchem       | CHEMBL1982924 | 0.804762 | 2511.89  |   |
| cdk_maccs     | CHEMBL1982924 | 0.731707 | 2511.89  |   |
| klekota_roth  | CHEMBL1990254 | 0.595238 | 10000.00 |   |

\*\*\* ki ACTIVITY \*\*\* value prediction

based on 5 locally validated fgps ---> 8409.678

["Pattern", "FP2", "TT\_bits", "substructure", "AP\_bits"]

71 rank

MAP/microtubule affinity-regulating kinase 2 : Homo sapiens

score: 3.716 on ChEMBL3831 based on 5 fingerprints

| Fingerprint type | Ligand        | Tanimoto | Similarity | activity | Valid fg |
|------------------|---------------|----------|------------|----------|----------|
| FeatMFP1         | CHEMBL1990254 | 0.700000 | 6309.57    |          |          |
| MFP1             | CHEMBL1990254 | 0.566667 | 6309.57    |          |          |
| RDKit7           | CHEMBL1990254 | 0.716753 | 6309.57    |          |          |
| Pattern          | CHEMBL1990254 | 0.911950 | 6309.57    |          | *        |
| AP_bits          | CHEMBL1990254 | 0.600000 | 6309.57    |          | *        |
| TT_bits          | CHEMBL1990254 | 0.622222 | 6309.57    |          | *        |
| FP2              | CHEMBL1990254 | 0.706522 | 6309.57    |          | *        |
| hybridization    | CHEMBL1990254 | 0.605381 | 6309.57    |          |          |
| substructure     | CHEMBL1982924 | 0.875000 | 1258.93    |          | *        |
| graph            | CHEMBL1965845 | 0.583333 | 794.33     |          |          |
| pubchem          | CHEMBL1982924 | 0.804762 | 1258.93    |          |          |
| cdk_maccs        | CHEMBL1982924 | 0.731707 | 1258.93    |          |          |
| klekota_roth     | CHEMBL1990254 | 0.595238 | 6309.57    |          |          |

\*\*\* ki ACTIVITY \*\*\* value prediction

based on 5 locally validated fgps ---> 5332.038

["Pattern", "FP2", "TT\_bits", "substructure", "AP\_bits"]

72 rank

Dual specificity tyrosine-phosphorylation-regulated kinase 1B : Homo sapiens

score: 3.716 on ChEMBL5543 based on 5 fingerprints

| Fingerprint type | Ligand        | Tanimoto | Similarity | activity | Valid fg |
|------------------|---------------|----------|------------|----------|----------|
| FeatMFP1         | CHEMBL1990254 | 0.700000 | 1584.89    |          |          |
| MFP1             | CHEMBL1990254 | 0.566667 | 1584.89    |          |          |
| RDKit7           | CHEMBL1990254 | 0.716753 | 1584.89    |          |          |
| Pattern          | CHEMBL1990254 | 0.911950 | 1584.89    |          | *        |
| AP_bits          | CHEMBL1990254 | 0.600000 | 1584.89    |          | *        |
| TT_bits          | CHEMBL1990254 | 0.622222 | 1584.89    |          | *        |
| FP2              | CHEMBL1990254 | 0.706522 | 1584.89    |          | *        |
| hybridization    | CHEMBL1990254 | 0.605381 | 1584.89    |          |          |
| substructure     | CHEMBL1984296 | 0.875000 | 1000.00    |          | *        |
| graph            | CHEMBL1968394 | 0.609756 | 19952.62   |          |          |
| pubchem          | CHEMBL1990254 | 0.802260 | 1584.89    |          |          |
| cdk_maccs        | CHEMBL269538  | 0.648649 | 166.00     |          |          |
| klekota_roth     | CHEMBL1990254 | 0.595238 | 1584.89    |          |          |

\*\*\* ki ACTIVITY \*\*\* value prediction

based on 5 locally validated fgps ---> 1467.912

["Pattern", "FP2", "TT\_bits", "substructure", "AP\_bits"]

73 rank

Serine/threonine-protein kinase PAK 4 : Homo sapiens

score: 3.701 on ChEMBL4482 based on 5 fingerprints

| Fingerprint type | Ligand        | Tanimoto | Similarity | activity | Valid fg |
|------------------|---------------|----------|------------|----------|----------|
| FeatMFP1         | CHEMBL1974288 | 0.666667 | 2511.89    |          |          |
| MFP1             | CHEMBL1974288 | 0.586207 | 2511.89    |          |          |

|               |               |          |         |   |
|---------------|---------------|----------|---------|---|
| RDKit7        | CHEMBL1974288 | 0.712821 | 2511.89 |   |
| Pattern       | CHEMBL1974288 | 0.912500 | 2511.89 | * |
| AP_bits       | CHEMBL1974288 | 0.582031 | 2511.89 | * |
| TT_bits       | CHEMBL1974288 | 0.622222 | 2511.89 | * |
| FP2           | CHEMBL1974288 | 0.709677 | 2511.89 | * |
| hybridization | CHEMBL1974288 | 0.587719 | 2511.89 |   |
| substructure  | CHEMBL1984296 | 0.875000 | 3981.07 | * |
| graph         | CHEMBL1974288 | 0.556818 | 2511.89 |   |
| pubchem       | CHEMBL1974288 | 0.824176 | 2511.89 |   |
| cdk_maccs     | CHEMBL1984296 | 0.609756 | 3981.07 |   |
| klekota_roth  | CHEMBL1974288 | 0.530612 | 2511.89 |   |

\*\*\* ki ACTIVITY \*\*\* value prediction

based on 5 locally validated fgps ---> 2805.726

["Pattern", "FP2", "TT\_bits", "substructure", "AP\_bits"]

74 rank

Serotonin 1a (5-HT1a) receptor : Rattus norvegicus

score: 3.479 on ChEMBL273 based on 4 fingerprints

| Fingerprint type | Ligand        | Tanimoto | Similarity | activity | Valid fg |
|------------------|---------------|----------|------------|----------|----------|
| FeatMFP1         | CHEMBL104593  | 0.652174 | 0.360      |          |          |
| MFP1             | CHEMBL147483  | 0.500000 | 27.000     |          |          |
| RDKit7           | CHEMBL294747  | 0.455335 | 3.162      |          |          |
| Pattern          | CHEMBL156845  | 0.885886 | 432.000    |          | *        |
| AP_bits          | CHEMBL72981   | 0.422343 | 1258.930   |          |          |
| TT_bits          | CHEMBL309021  | 0.392857 | 19952.620  |          |          |
| FP2              | CHEMBL294747  | 0.568966 | 3.162      |          |          |
| hybridization    | CHEMBL1161083 | 0.463343 | 2.600      |          |          |
| substructure     | CHEMBL2112905 | 0.882353 | 58.600     |          | *        |
| graph            | CHEMBL315684  | 0.831325 | 2.800      |          | *        |
| pubchem          | CHEMBL309021  | 0.878947 | 19952.620  |          | *        |
| cdk_maccs        | CHEMBL2112774 | 0.591837 | 17.000     |          |          |
| klekota_roth     | CHEMBL2112384 | 0.459016 | 4300.000   |          |          |

\*\*\* ki ACTIVITY \*\*\* value prediction

based on 4 locally validated fgps ---> 2746.154

["Pattern", "pubchem", "substructure", "graph"]

75 rank

MAP kinase p38 delta : Homo sapiens

score: 2.844 on ChEMBL2939 based on 4 fingerprints

| Fingerprint type | Ligand        | Tanimoto | Similarity | activity | Valid fg |
|------------------|---------------|----------|------------|----------|----------|
| FeatMFP1         | CHEMBL1990254 | 0.700000 | 794.33     |          |          |
| MFP1             | CHEMBL1974288 | 0.586207 | 5011.87    |          |          |
| RDKit7           | CHEMBL1990254 | 0.716753 | 794.33     |          |          |
| Pattern          | CHEMBL1974288 | 0.912500 | 5011.87    |          | *        |
| AP_bits          | CHEMBL1990254 | 0.600000 | 794.33     |          | *        |
| TT_bits          | CHEMBL1974288 | 0.622222 | 5011.87    |          | *        |
| FP2              | CHEMBL1974288 | 0.709677 | 5011.87    |          | *        |
| hybridization    | CHEMBL1990254 | 0.605381 | 794.33     |          |          |
| substructure     | CHEMBL1991078 | 0.823529 | 501.19     |          |          |
| graph            | CHEMBL1990254 | 0.563218 | 794.33     |          |          |
| pubchem          | CHEMBL1974288 | 0.824176 | 5011.87    |          |          |
| cdk_maccs        | CHEMBL1997759 | 0.625000 | 251.19     |          |          |
| klekota_roth     | CHEMBL1990254 | 0.595238 | 794.33     |          |          |

\*\*\* ki ACTIVITY \*\*\* value prediction

based on 4 locally validated fgps ---> 2896.420

["Pattern", "FP2", "TT\_bits", "AP\_bits"]

76 rank

MAP kinase-activated protein kinase 2 : Homo sapiens

score: 2.841 on ChEMBL2208 based on 4 fingerprints

| Fingerprint type | Ligand        | Tanimoto | Similarity | activity | Valid fg |
|------------------|---------------|----------|------------|----------|----------|
| FeatMFP1         | CHEMBL1990254 |          | 0.700000   | 794.33   |          |
| MFP1             | CHEMBL1990254 |          | 0.566667   | 794.33   |          |
| RDKit7           | CHEMBL1990254 |          | 0.716753   | 794.33   |          |
| Pattern          | CHEMBL1990254 |          | 0.911950   | 794.33   | *        |
| AP_bits          | CHEMBL1990254 |          | 0.600000   | 794.33   | *        |
| TT_bits          | CHEMBL1990254 |          | 0.622222   | 794.33   | *        |
| FP2              | CHEMBL1990254 |          | 0.706522   | 794.33   | *        |
| hybridization    | CHEMBL1990254 |          | 0.605381   | 794.33   |          |
| substructure     | CHEMBL1987009 |          | 0.823529   | 6309.57  |          |
| graph            | CHEMBL235658  |          | 0.613636   | 330.00   |          |
| pubchem          | CHEMBL1990254 |          | 0.802260   | 794.33   |          |
| cdk_maccs        | CHEMBL1982506 |          | 0.617021   | 3981.07  |          |
| klekota_roth     | CHEMBL1990254 |          | 0.595238   | 794.33   |          |

\*\*\* ki ACTIVITY \*\*\* value prediction  
based on 4 locally validated fgps ---> 794.330  
["Pattern", "FP2", "TT\_bits", "AP\_bits"]

77 rank

Serine/threonine-protein kinase PAK 1 : Homo sapiens

score: 2.841 on ChEMBL4600 based on 4 fingerprints

| Fingerprint type | Ligand        | Tanimoto | Similarity | activity | Valid fg |
|------------------|---------------|----------|------------|----------|----------|
| FeatMFP1         | CHEMBL1990254 |          | 0.700000   | 6309.57  |          |
| MFP1             | CHEMBL1990254 |          | 0.566667   | 6309.57  |          |
| RDKit7           | CHEMBL1990254 |          | 0.716753   | 6309.57  |          |
| Pattern          | CHEMBL1990254 |          | 0.911950   | 6309.57  | *        |
| AP_bits          | CHEMBL1990254 |          | 0.600000   | 6309.57  | *        |
| TT_bits          | CHEMBL1990254 |          | 0.622222   | 6309.57  | *        |
| FP2              | CHEMBL1990254 |          | 0.706522   | 6309.57  | *        |
| hybridization    | CHEMBL1990254 |          | 0.605381   | 6309.57  |          |
| substructure     | CHEMBL1999931 |          | 0.764706   | 3981.07  |          |
| graph            | CHEMBL1990254 |          | 0.563218   | 6309.57  |          |
| pubchem          | CHEMBL1990254 |          | 0.802260   | 6309.57  |          |
| cdk_maccs        | CHEMBL1967302 |          | 0.583333   | 7943.28  |          |
| klekota_roth     | CHEMBL1990254 |          | 0.595238   | 6309.57  |          |

\*\*\* ki ACTIVITY \*\*\* value prediction  
based on 4 locally validated fgps ---> 6309.570  
["Pattern", "FP2", "TT\_bits", "AP\_bits"]

78 rank

MAP kinase p38 gamma : Homo sapiens

score: 2.841 on ChEMBL4674 based on 4 fingerprints

| Fingerprint type | Ligand        | Tanimoto | Similarity | activity | Valid fg |
|------------------|---------------|----------|------------|----------|----------|
| FeatMFP1         | CHEMBL1990254 |          | 0.700000   | 3162.28  |          |
| MFP1             | CHEMBL1990254 |          | 0.566667   | 3162.28  |          |
| RDKit7           | CHEMBL1990254 |          | 0.716753   | 3162.28  |          |
| Pattern          | CHEMBL1990254 |          | 0.911950   | 3162.28  | *        |
| AP_bits          | CHEMBL1990254 |          | 0.600000   | 3162.28  | *        |
| TT_bits          | CHEMBL1990254 |          | 0.622222   | 3162.28  | *        |
| FP2              | CHEMBL1990254 |          | 0.706522   | 3162.28  | *        |
| hybridization    | CHEMBL1990254 |          | 0.605381   | 3162.28  |          |
| substructure     | CHEMBL1978099 |          | 0.823529   | 3162.28  |          |
| graph            | CHEMBL1990254 |          | 0.563218   | 3162.28  |          |
| pubchem          | CHEMBL1990254 |          | 0.802260   | 3162.28  |          |
| cdk_maccs        | CHEMBL116070  |          | 0.613636   | 5011.87  |          |
| klekota_roth     | CHEMBL1990254 |          | 0.595238   | 3162.28  |          |

\*\*\* ki ACTIVITY \*\*\* value prediction  
based on 4 locally validated fgps ---> 3162.280  
["Pattern", "FP2", "TT\_bits", "AP\_bits"]



## MuSSEL Prediction IC<sub>50</sub>:

1 rank

Rho-associated protein kinase 2 : Homo sapiens

score: 8.799 on ChEMBL2973 based on 11 fingerprints

| Fingerprint type | Ligand        | Tanimoto | Similarity | activity | Valid fg |
|------------------|---------------|----------|------------|----------|----------|
| FeatMFP1         | ChEMBL3578250 |          | 0.947368   | 0.51     | *        |
| MFP1             | ChEMBL3578250 |          | 0.727273   | 0.51     | *        |
| RDKit7           | ChEMBL3578250 |          | 0.595696   | 0.51     |          |
| Pattern          | ChEMBL597321  |          | 0.889231   | 5000.00  | *        |
| AP_bits          | ChEMBL3578250 |          | 0.714815   | 0.51     | *        |
| TT_bits          | ChEMBL3578250 |          | 0.589286   | 0.51     | *        |
| FP2              | ChEMBL1923167 |          | 0.708738   | 2.00     | *        |
| hybridization    | ChEMBL3578253 |          | 0.647619   | 1.16     | *        |
| substructure     | ChEMBL3578250 |          | 1.000000   | 0.51     | *        |
| graph            | ChEMBL3578253 |          | 0.788462   | 1.16     | *        |
| pubchem          | ChEMBL3578250 |          | 0.935829   | 0.51     | *        |
| cdk_maccs        | ChEMBL3578250 |          | 0.769231   | 0.51     |          |
| klekota_roth     | ChEMBL3578253 |          | 0.850000   | 1.16     | *        |

\*\*\* ic50 ACTIVITY \*\*\* value prediction

based on 11 locally validated fgps ---> 233.845

["TT\_bits", "substructure", "Pattern", "AP\_bits", "MFP1", "pubchem",  
"graph", "FP2", "FeatMFP1", "klekota\_roth", "hybridization"]

2 rank

MAP kinase p38 alpha : Homo sapiens

score: 7.489 on ChEMBL260 based on 10 fingerprints

| Fingerprint type | Ligand        | Tanimoto | Similarity | activity | Valid fg |
|------------------|---------------|----------|------------|----------|----------|
| FeatMFP1         | ChEMBL197753  |          | 0.695652   | 130.0    | *        |
| MFP1             | ChEMBL2059876 |          | 0.545455   | 22000.0  | *        |
| RDKit7           | ChEMBL517671  |          | 0.590258   | 23.0     |          |
| Pattern          | ChEMBL1796293 |          | 0.884146   | 600.0    | *        |
| AP_bits          | ChEMBL186802  |          | 0.529595   | 140.0    | *        |
| TT_bits          | ChEMBL158477  |          | 0.436364   | 420.0    |          |
| FP2              | ChEMBL517671  |          | 0.656566   | 23.0     | *        |
| hybridization    | ChEMBL517671  |          | 0.680000   | 23.0     | *        |
| substructure     | ChEMBL184555  |          | 1.000000   | 70.0     | *        |
| graph            | ChEMBL517671  |          | 0.817073   | 23.0     | *        |
| pubchem          | ChEMBL492266  |          | 0.880829   | 0.6      | *        |
| cdk_maccs        | ChEMBL1427458 |          | 0.800000   | 4700.0   | *        |
| klekota_roth     | ChEMBL252535  |          | 0.583333   | 2.2      |          |

\*\*\* ic50 ACTIVITY \*\*\* value prediction

based on 9 locally validated fgps ---> 4528.984

["substructure", "Pattern", "AP\_bits", "MFP1", "pubchem", "graph", "FP2",  
"FeatMFP1", "hybridization"]

3 rank

Rho-associated protein kinase 1 : Homo sapiens

score: 7.466 on ChEMBL3231 based on 10 fingerprints

| Fingerprint type | Ligand        | Tanimoto | Similarity | activity | Valid fg |
|------------------|---------------|----------|------------|----------|----------|
| FeatMFP1         | ChEMBL3218282 |          | 0.772727   | 30.0     | *        |
| MFP1             | ChEMBL3218282 |          | 0.696970   | 30.0     | *        |
| RDKit7           | ChEMBL1923173 |          | 0.547750   | 2.0      |          |
| Pattern          | ChEMBL598336  |          | 0.854396   | 4300.0   | *        |
| AP_bits          | ChEMBL1923173 |          | 0.652330   | 2.0      | *        |
| TT_bits          | ChEMBL3218282 |          | 0.518519   | 30.0     | *        |
| FP2              | ChEMBL1923167 |          | 0.708738   | 11.0     | *        |
| hybridization    | ChEMBL1923167 |          | 0.644689   | 11.0     | *        |
| substructure     | ChEMBL1923163 |          | 0.937500   | 1200.0   | *        |
| graph            | ChEMBL1923052 |          | 0.670000   | 1900.0   |          |
| pubchem          | ChEMBL598336  |          | 0.875000   | 4300.0   | *        |
| cdk_maccs        | ChEMBL1923167 |          | 0.697674   | 11.0     |          |

```

    klekota_roth CHEMBL1923181          0.804878      6.0      *
    *** ic50 ACTIVITY *** value prediction
    based on 10 locally validated fgps ---> 1103.528
    ["TT_bits", "substructure", "Pattern", "AP_bits", "MFP1", "pubchem",
    "FP2", "FeatMFP1", "klekota_roth", "hybridization"]

```

4 rank

Acetyl-CoA carboxylase 2 : Homo sapiens

score: 7.156 on ChEMBL4829 based on 9 fingerprints

| Fingerprint type | Ligand        | Tanimoto | Similarity | activity | Valid fg |
|------------------|---------------|----------|------------|----------|----------|
| FeatMFP1         | CHEMBL3690672 |          | 0.800000   | 530.0    | *        |
| MFP1             | CHEMBL576037  |          | 0.714286   | 373.0    | *        |
| RDKit7           | CHEMBL568145  |          | 0.524862   | 609.0    |          |
| Pattern          | CHEMBL576037  |          | 0.913174   | 373.0    | *        |
| AP_bits          | CHEMBL567936  |          | 0.461300   | 33.0     |          |
| TT_bits          | CHEMBL576037  |          | 0.595745   | 373.0    | *        |
| FP2              | CHEMBL565418  |          | 0.628866   | 113.0    |          |
| hybridization    | CHEMBL3690674 |          | 0.478261   | 2700.0   |          |
| substructure     | CHEMBL3659849 |          | 0.882353   | 530.0    | *        |
| graph            | CHEMBL3698542 |          | 0.770115   | 3400.0   | *        |
| pubchem          | CHEMBL3690650 |          | 0.897297   | 930.0    | *        |
| cdk_maccs        | CHEMBL585491  |          | 0.909091   | 32.0     | *        |
| klekota_roth     | CHEMBL576037  |          | 0.673469   | 373.0    | *        |

```

    *** ic50 ACTIVITY *** value prediction
    based on 9 locally validated fgps ---> 705.977
    ["TT_bits", "substructure", "Pattern", "MFP1", "pubchem", "graph",
    "FeatMFP1", "klekota_roth", "cdk_maccs"]

```

5 rank

Matrix metalloproteinase 13 : Homo sapiens

score: 6.703 on ChEMBL280 based on 9 fingerprints

| Fingerprint type | Ligand        | Tanimoto | Similarity | activity | Valid fg |
|------------------|---------------|----------|------------|----------|----------|
| FeatMFP1         | CHEMBL1796289 |          | 0.684211   | 39810.72 | *        |
| MFP1             | CHEMBL605201  |          | 0.551724   | 1350.00  | *        |
| RDKit7           | CHEMBL1796289 |          | 0.531876   | 39810.72 |          |
| Pattern          | CHEMBL1796282 |          | 0.940439   | 50118.72 | *        |
| AP_bits          | CHEMBL1796289 |          | 0.510373   | 39810.72 | *        |
| TT_bits          | CHEMBL1796289 |          | 0.468085   | 39810.72 |          |
| FP2              | CHEMBL1796289 |          | 0.686047   | 39810.72 | *        |
| hybridization    | CHEMBL605201  |          | 0.715640   | 1350.00  | *        |
| substructure     | CHEMBL511942  |          | 0.933333   | 72.00    | *        |
| graph            | CHEMBL596494  |          | 0.700000   | 77.00    |          |
| pubchem          | CHEMBL1427458 |          | 0.875000   | 10000.00 | *        |
| cdk_maccs        | CHEMBL1796287 |          | 0.806452   | 25118.86 | *        |
| klekota_roth     | CHEMBL1796281 |          | 0.510638   | 25118.86 |          |

```

    *** ic50 ACTIVITY *** value prediction
    based on 9 locally validated fgps ---> 18351.504
    ["substructure", "Pattern", "AP_bits", "MFP1", "pubchem", "FP2",
    "FeatMFP1", "cdk_maccs", "hybridization"]

```

6 rank

Platelet activating factor receptor : Homo sapiens

score: 6.602 on ChEMBL250 based on 8 fingerprints

| Fingerprint type | Ligand       | Tanimoto | Similarity | activity | Valid fg |
|------------------|--------------|----------|------------|----------|----------|
| FeatMFP1         | CHEMBL432324 |          | 0.809524   | 50.0     | *        |
| MFP1             | CHEMBL51238  |          | 0.718750   | 20.0     | *        |
| RDKit7           | CHEMBL412441 |          | 0.533632   | 280.0    |          |
| Pattern          | CHEMBL51238  |          | 0.936937   | 20.0     | *        |
| AP_bits          | CHEMBL299760 |          | 0.457227   | 50.0     |          |
| TT_bits          | CHEMBL51238  |          | 0.551020   | 20.0     | *        |



|               |              |          |       |   |
|---------------|--------------|----------|-------|---|
| FP2           | CHEMBL412441 | 0.620690 | 280.0 |   |
| hybridization | CHEMBL299856 | 0.448387 | 30.0  |   |
| substructure  | CHEMBL432324 | 0.937500 | 50.0  | * |
| graph         | CHEMBL99294  | 0.816092 | 1.0   | * |
| pubchem       | CHEMBL51238  | 0.994286 | 20.0  | * |
| cdk_maccs     | CHEMBL53014  | 0.837838 | 10.0  | * |
| klekota_roth  | CHEMBL51238  | 0.524590 | 20.0  |   |

\*\*\* ic50 ACTIVITY \*\*\* value prediction  
 based on 8 locally validated fgps ---> 52.564  
 ["TT\_bits", "substructure", "Pattern", "MFP1", "pubchem", "graph",  
 "FeatMFP1", "cdk\_maccs"]

7 rank

Cytochrome P450 3A4 : Homo sapiens

score: 6.586 on CHEMBL340 based on 9 fingerprints

| Fingerprint type | Ligand        | Tanimoto | Similarity | activity | Valid | fg |
|------------------|---------------|----------|------------|----------|-------|----|
| FeatMFP1         | CHEMBL271622  |          | 0.714286   | 33000.0  |       | *  |
| MFP1             | CHEMBL1951443 |          | 0.655172   | 130.0    |       | *  |
| RDKit7           | CHEMBL598336  |          | 0.486150   | 4000.0   |       |    |
| Pattern          | CHEMBL1796293 |          | 0.884146   | 1000.0   |       | *  |
| AP_bits          | CHEMBL1951330 |          | 0.537415   | 200.0    |       | *  |
| TT_bits          | CHEMBL1951443 |          | 0.540000   | 130.0    |       | *  |
| FP2              | CHEMBL598336  |          | 0.642202   | 4000.0   |       | *  |
| hybridization    | CHEMBL10188   |          | 0.578947   | 4000.0   |       |    |
| substructure     | CHEMBL271326  |          | 0.937500   | 34000.0  |       | *  |
| graph            | CHEMBL1650646 |          | 0.684783   | 2050.0   |       |    |
| pubchem          | CHEMBL1427458 |          | 0.875000   | 1000.0   |       | *  |
| cdk_maccs        | CHEMBL1427458 |          | 0.800000   | 1000.0   |       | *  |
| klekota_roth     | CHEMBL2017287 |          | 0.510204   | 2000.0   |       |    |

\*\*\* ic50 ACTIVITY \*\*\* value prediction  
 based on 8 locally validated fgps ---> 6704.417  
 ["TT\_bits", "substructure", "Pattern", "AP\_bits", "MFP1", "pubchem",  
 "FP2", "FeatMFP1"]

8 rank

Cytochrome P450 11B1 : Homo sapiens

score: 6.164 on CHEMBL1908 based on 8 fingerprints

| Fingerprint type | Ligand        | Tanimoto | Similarity | activity | Valid | fg |
|------------------|---------------|----------|------------|----------|-------|----|
| FeatMFP1         | CHEMBL502823  |          | 0.750000   | 41557.0  |       | *  |
| MFP1             | CHEMBL438802  |          | 0.607143   | 10505.0  |       | *  |
| RDKit7           | CHEMBL3421782 |          | 0.575472   | 1150.0   |       |    |
| Pattern          | CHEMBL3421782 |          | 0.934132   | 1150.0   |       | *  |
| AP_bits          | CHEMBL500393  |          | 0.504167   | 151.0    |       | *  |
| TT_bits          | CHEMBL1173259 |          | 0.416667   | 3100.0   |       |    |
| FP2              | CHEMBL3421782 |          | 0.723810   | 1150.0   |       | *  |
| hybridization    | CHEMBL176098  |          | 0.406844   | 206.0    |       |    |
| substructure     | CHEMBL3421634 |          | 0.875000   | 1207.0   |       | *  |
| graph            | CHEMBL1765226 |          | 0.758621   | 128.0    |       |    |
| pubchem          | CHEMBL3421781 |          | 0.912568   | 594.0    |       | *  |
| cdk_maccs        | CHEMBL502823  |          | 0.857143   | 41557.0  |       | *  |
| klekota_roth     | CHEMBL3286405 |          | 0.461538   | 2300.0   |       |    |

\*\*\* ic50 ACTIVITY \*\*\* value prediction  
 based on 8 locally validated fgps ---> 9019.047  
 ["substructure", "Pattern", "AP\_bits", "MFP1", "pubchem", "FP2",  
 "FeatMFP1", "cdk\_maccs"]

9 rank

Cytochrome P450 11B2 : Homo sapiens

score: 6.164 on CHEMBL2722 based on 8 fingerprints

| Fingerprint type | Ligand | Tanimoto | Similarity | activity | Valid | fg |
|------------------|--------|----------|------------|----------|-------|----|
|------------------|--------|----------|------------|----------|-------|----|

|               |               |          |        |   |
|---------------|---------------|----------|--------|---|
| FeatMFP1      | CHEMBL502823  | 0.750000 | 94.0   | * |
| MFP1          | CHEMBL438802  | 0.607143 | 72.0   | * |
| RDKit7        | CHEMBL3421782 | 0.575472 | 816.0  |   |
| Pattern       | CHEMBL3421782 | 0.934132 | 816.0  | * |
| AP_bits       | CHEMBL500393  | 0.504167 | 4.8    | * |
| TT_bits       | CHEMBL1173259 | 0.416667 | 3450.0 |   |
| FP2           | CHEMBL3421782 | 0.723810 | 816.0  | * |
| hybridization | CHEMBL175979  | 0.411067 | 22.0   |   |
| substructure  | CHEMBL3421634 | 0.875000 | 756.0  | * |
| graph         | CHEMBL1765226 | 0.758621 | 2.4    |   |
| pubchem       | CHEMBL3421781 | 0.912568 | 299.0  | * |
| cdk_maccs     | CHEMBL502823  | 0.857143 | 94.0   | * |
| klekota_roth  | CHEMBL3286405 | 0.461538 | 5.0    |   |

\*\*\* ic50 ACTIVITY \*\*\* value prediction  
 based on 8 locally validated fgps ---> 352.011  
 ["substructure", "Pattern", "AP\_bits", "MFP1", "pubchem", "FP2",  
 "FeatMFP1", "cdk\_maccs"]

10 rank

Gamma-secretase : Homo sapiens

score: 5.520 on ChEMBL2094135 based on 7 fingerprints

| Fingerprint type | Ligand        | Tanimoto | Similarity | activity | Valid fg |
|------------------|---------------|----------|------------|----------|----------|
| FeatMFP1         | CHEMBL2415087 | 0.666667 | 158.0      |          |          |
| MFP1             | CHEMBL3086721 | 0.625000 | 150.0      |          | *        |
| RDKit7           | CHEMBL3087026 | 0.549142 | 2120.0     |          |          |
| Pattern          | CHEMBL3087026 | 0.876106 | 2120.0     |          | *        |
| AP_bits          | CHEMBL3086738 | 0.616935 | 6000.0     |          | *        |
| TT_bits          | CHEMBL2018334 | 0.431034 | 2600.0     |          |          |
| FP2              | CHEMBL3087026 | 0.576577 | 2120.0     |          |          |
| hybridization    | CHEMBL3792849 | 0.528455 | 95000.0    |          |          |
| substructure     | CHEMBL2415087 | 0.937500 | 158.0      |          | *        |
| graph            | CHEMBL3086721 | 0.674699 | 150.0      |          |          |
| pubchem          | CHEMBL3086721 | 0.857143 | 150.0      |          | *        |
| cdk_maccs        | CHEMBL3086721 | 0.911765 | 150.0      |          | *        |
| klekota_roth     | CHEMBL2018334 | 0.695652 | 2600.0     |          | *        |

\*\*\* ic50 ACTIVITY \*\*\* value prediction  
 based on 7 locally validated fgps ---> 1832.581  
 ["substructure", "Pattern", "MFP1", "pubchem", "AP\_bits", "klekota\_roth",  
 "cdk\_maccs"]

11 rank

Sentrin-specific protease 7 : Homo sapiens

score: 5.479 on ChEMBL1741213 based on 7 fingerprints

| Fingerprint type | Ligand        | Tanimoto | Similarity | activity | Valid fg |
|------------------|---------------|----------|------------|----------|----------|
| FeatMFP1         | CHEMBL1387142 | 0.636364 | 4980.0     |          |          |
| MFP1             | CHEMBL1475973 | 0.571429 | 5270.0     |          | *        |
| RDKit7           | CHEMBL1573380 | 0.392744 | 5620.0     |          |          |
| Pattern          | CHEMBL1475973 | 0.879880 | 5270.0     |          | *        |
| AP_bits          | CHEMBL1387142 | 0.592742 | 4980.0     |          | *        |
| TT_bits          | CHEMBL1578879 | 0.479167 | 2680.0     |          |          |
| FP2              | CHEMBL1573380 | 0.567010 | 5620.0     |          |          |
| hybridization    | CHEMBL1319034 | 0.484496 | 6130.0     |          |          |
| substructure     | CHEMBL1507938 | 0.933333 | 3980.0     |          | *        |
| graph            | CHEMBL1578879 | 0.780488 | 2680.0     |          | *        |
| pubchem          | CHEMBL1387142 | 0.892473 | 4980.0     |          | *        |
| cdk_maccs        | CHEMBL1387142 | 0.828571 | 4980.0     |          | *        |
| klekota_roth     | CHEMBL1469986 | 0.454545 | 18400.0    |          |          |

\*\*\* ic50 ACTIVITY \*\*\* value prediction  
 based on 7 locally validated fgps ---> 4170.557

["substructure", "Pattern", "AP\_bits", "MFP1", "pubchem", "graph",  
"cdk\_maccs"]

12 rank

Caspase-3 : Homo sapiens

score: 5.479 on ChEMBL2334 based on 7 fingerprints

| Fingerprint type | Ligand        | Tanimoto | Similarity | activity | Valid fg |
|------------------|---------------|----------|------------|----------|----------|
| FeatMFP1         | ChEMBL1387142 |          | 0.636364   | 17500.0  |          |
| MFP1             | ChEMBL1475973 |          | 0.571429   | 30300.0  | *        |
| RDKit7           | ChEMBL1573380 |          | 0.392744   | 21800.0  |          |
| Pattern          | ChEMBL1475973 |          | 0.879880   | 30300.0  | *        |
| AP_bits          | ChEMBL1387142 |          | 0.592742   | 17500.0  | *        |
| TT_bits          | ChEMBL1578879 |          | 0.479167   | 5560.0   |          |
| FP2              | ChEMBL1573380 |          | 0.567010   | 21800.0  |          |
| hybridization    | ChEMBL205983  |          | 0.584000   | 4630.0   |          |
| substructure     | ChEMBL1507938 |          | 0.933333   | 15600.0  | *        |
| graph            | ChEMBL1578879 |          | 0.780488   | 5560.0   | *        |
| pubchem          | ChEMBL1387142 |          | 0.892473   | 17500.0  | *        |
| cdk_maccs        | ChEMBL1387142 |          | 0.828571   | 17500.0  | *        |
| klekota_roth     | ChEMBL2391777 |          | 0.471698   | 85.0     |          |

\*\*\* ic50 ACTIVITY \*\*\* value prediction

based on 7 locally validated fgps ---> 14761.051

["substructure", "Pattern", "AP\_bits", "MFP1", "pubchem", "graph",  
"cdk\_maccs"]

13 rank

Poly [ADP-ribose] polymerase-1 : Homo sapiens

score: 5.467 on ChEMBL3105 based on 7 fingerprints

| Fingerprint type | Ligand        | Tanimoto | Similarity | activity | Valid fg |
|------------------|---------------|----------|------------|----------|----------|
| FeatMFP1         | ChEMBL480233  |          | 0.714286   | 62000.0  | *        |
| MFP1             | ChEMBL123978  |          | 0.500000   | 17000.0  |          |
| RDKit7           | ChEMBL3105430 |          | 0.412162   | 820.0    |          |
| Pattern          | ChEMBL480710  |          | 0.894895   | 18.0     | *        |
| AP_bits          | ChEMBL501290  |          | 0.481356   | 4533.0   | *        |
| TT_bits          | ChEMBL480233  |          | 0.396226   | 62000.0  |          |
| FP2              | ChEMBL480233  |          | 0.514019   | 62000.0  |          |
| hybridization    | ChEMBL594596  |          | 0.516432   | 540.0    |          |
| substructure     | ChEMBL3589258 |          | 0.866667   | 43000.0  | *        |
| graph            | ChEMBL294995  |          | 0.809524   | 184.0    | *        |
| pubchem          | ChEMBL480233  |          | 0.842932   | 62000.0  | *        |
| cdk_maccs        | ChEMBL480233  |          | 0.857143   | 62000.0  | *        |
| klekota_roth     | ChEMBL3827329 |          | 0.444444   | 2404.0   |          |

\*\*\* ic50 ACTIVITY \*\*\* value prediction

based on 7 locally validated fgps ---> 24685.036

["substructure", "Pattern", "AP\_bits", "pubchem", "graph", "FeatMFP1",  
"cdk\_maccs"]

14 rank

Luciferase : Luciola lateralis

score: 5.325 on ChEMBL3701 based on 7 fingerprints

| Fingerprint type | Ligand       | Tanimoto | Similarity | activity | Valid fg |
|------------------|--------------|----------|------------|----------|----------|
| FeatMFP1         | ChEMBL467971 |          | 0.750000   | 310.0    | *        |
| MFP1             | ChEMBL467971 |          | 0.586207   | 310.0    | *        |
| RDKit7           | ChEMBL467971 |          | 0.409731   | 310.0    |          |
| Pattern          | ChEMBL467971 |          | 0.852410   | 310.0    | *        |
| AP_bits          | ChEMBL467971 |          | 0.496124   | 310.0    | *        |
| TT_bits          | ChEMBL467971 |          | 0.384615   | 310.0    |          |
| FP2              | ChEMBL467971 |          | 0.460938   | 310.0    |          |
| hybridization    | ChEMBL467971 |          | 0.295547   | 310.0    |          |
| substructure     | ChEMBL405914 |          | 0.937500   | 610.0    | *        |

|              |              |          |       |   |
|--------------|--------------|----------|-------|---|
| graph        | CHEMBL467971 | 0.567308 | 310.0 |   |
| pubchem      | CHEMBL467971 | 0.869110 | 310.0 | * |
| cdk_maccs    | CHEMBL467971 | 0.833333 | 310.0 | * |
| klekota_roth | CHEMBL467971 | 0.372093 | 310.0 |   |

\*\*\* ic50 ACTIVITY \*\*\* value prediction  
 based on 7 locally validated fgps ---> 755.039  
 ["substructure", "Pattern", "MFP1", "pubchem", "AP\_bits", "FeatMFP1",  
 "cdk\_maccs"]

15 rank

Vascular endothelial growth factor receptor 2 : Homo sapiens

score: 5.314 on ChEMBL279 based on 7 fingerprints

| Fingerprint type | Ligand       | Tanimoto Similarity | activity   | Valid fg |
|------------------|--------------|---------------------|------------|----------|
| FeatMFP1         | CHEMBL269871 | 0.727273            | 1.2880     | *        |
| MFP1             | CHEMBL408211 | 0.606061            | 5.0000     | *        |
| RDKit7           | CHEMBL271271 | 0.481956            | 16000.0000 |          |
| Pattern          | CHEMBL427725 | 0.866667            | 200.0000   | *        |
| AP_bits          | CHEMBL518652 | 0.517460            | 110.0000   | *        |
| TT_bits          | CHEMBL526639 | 0.403846            | 500.0000   |          |
| FP2              | CHEMBL270342 | 0.558824            | 0.4467     |          |
| hybridization    | CHEMBL184223 | 0.619926            | 21.0000    |          |
| substructure     | CHEMBL269871 | 0.937500            | 1.2880     | *        |
| graph            | CHEMBL452812 | 0.656250            | 13000.0000 |          |
| pubchem          | CHEMBL245745 | 0.830918            | 5.0000     | *        |
| cdk_maccs        | CHEMBL272252 | 0.828571            | 1.2000     | *        |
| klekota_roth     | CHEMBL271271 | 0.500000            | 16000.0000 |          |

\*\*\* ic50 ACTIVITY \*\*\* value prediction  
 based on 7 locally validated fgps ---> 1281.064  
 ["substructure", "Pattern", "MFP1", "pubchem", "AP\_bits", "FeatMFP1",  
 "cdk\_maccs"]

16 rank

HERG : Homo sapiens

score: 5.299 on ChEMBL240 based on 7 fingerprints

| Fingerprint type | Ligand        | Tanimoto Similarity | activity | Valid fg |
|------------------|---------------|---------------------|----------|----------|
| FeatMFP1         | CHEMBL1671897 | 0.727273            | 10000.00 | *        |
| MFP1             | CHEMBL1779014 | 0.514286            | 18800.00 |          |
| RDKit7           | CHEMBL1671897 | 0.437204            | 10000.00 |          |
| Pattern          | CHEMBL1779014 | 0.911504            | 18800.00 | *        |
| AP_bits          | CHEMBL3185736 | 0.470383            | 12400.00 | *        |
| TT_bits          | CHEMBL2069407 | 0.370968            | 2511.89  |          |
| FP2              | CHEMBL271801  | 0.594340            | 363.08   |          |
| hybridization    | CHEMBL3099899 | 0.630435            | 6950.00  | *        |
| substructure     | CHEMBL1671897 | 0.875000            | 10000.00 | *        |
| graph            | CHEMBL1671885 | 0.772727            | 100.00   | *        |
| pubchem          | CHEMBL1671897 | 0.912088            | 10000.00 | *        |
| cdk_maccs        | CHEMBL1779014 | 0.714286            | 18800.00 |          |
| klekota_roth     | CHEMBL2069416 | 0.444444            | 3981.07  |          |

\*\*\* ic50 ACTIVITY \*\*\* value prediction  
 based on 7 locally validated fgps ---> 12025.348  
 ["substructure", "Pattern", "AP\_bits", "pubchem", "graph", "FeatMFP1",  
 "hybridization"]

17 rank

Serine/threonine-protein kinase Aurora-B : Homo sapiens

score: 5.290 on ChEMBL2185 based on 7 fingerprints

| Fingerprint type | Ligand        | Tanimoto Similarity | activity | Valid fg |
|------------------|---------------|---------------------|----------|----------|
| FeatMFP1         | CHEMBL269871  | 0.727273            | 46.00    | *        |
| MFP1             | CHEMBL408211  | 0.606061            | 190.00   | *        |
| RDKit7           | CHEMBL3343058 | 0.362220            | 18100.00 |          |

|               |               |          |         |   |
|---------------|---------------|----------|---------|---|
| Pattern       | CHEMBL3343044 | 0.848901 | 5910.00 | * |
| AP_bits       | CHEMBL382590  | 0.493976 | 1250.00 | * |
| TT_bits       | CHEMBL3680499 | 0.424242 | 0.94    |   |
| FP2           | CHEMBL408211  | 0.542857 | 190.00  |   |
| hybridization | CHEMBL452812  | 0.498246 | 4900.00 |   |
| substructure  | CHEMBL269871  | 0.937500 | 46.00   | * |
| graph         | CHEMBL388956  | 0.715789 | 2140.00 |   |
| pubchem       | CHEMBL3670416 | 0.847716 | 8.20    | * |
| cdk_maccs     | CHEMBL272252  | 0.828571 | 130.00  | * |
| klekota_roth  | CHEMBL408211  | 0.473684 | 190.00  |   |

\*\*\* ic50 ACTIVITY \*\*\* value prediction  
based on 7 locally validated fgps ---> 2157.602  
["substructure", "Pattern", "MFP1", "pubchem", "AP\_bits", "FeatMFP1",  
"cdk\_maccs"]

18 rank

Mitochondrial import inner membrane translocase subunit TIM10 :  
Saccharomyces cerevisiae S288c

score: 5.240 on CHEMBL1741194 based on 7 fingerprints

| Fingerprint type | Ligand        | Tanimoto | Similarity | activity | Valid fg |
|------------------|---------------|----------|------------|----------|----------|
| FeatMFP1         | CHEMBL1467168 | 0.600000 | 17200.0    |          |          |
| MFP1             | CHEMBL1389690 | 0.592593 | 24400.0    |          | *        |
| RDKit7           | CHEMBL438729  | 0.547382 | 47300.0    |          |          |
| Pattern          | CHEMBL1475973 | 0.879880 | 27300.0    |          | *        |
| AP_bits          | CHEMBL1475973 | 0.496479 | 27300.0    |          | *        |
| TT_bits          | CHEMBL1398317 | 0.361702 | 3420.0     |          |          |
| FP2              | CHEMBL438729  | 0.633929 | 47300.0    |          | *        |
| hybridization    | CHEMBL1363382 | 0.536765 | 2890.0     |          |          |
| substructure     | CHEMBL1482509 | 1.000000 | 22800.0    |          | *        |
| graph            | CHEMBL1336269 | 0.780488 | 6800.0     |          | *        |
| pubchem          | CHEMBL1482509 | 0.856410 | 22800.0    |          | *        |
| cdk_maccs        | CHEMBL1389690 | 0.727273 | 24400.0    |          |          |
| klekota_roth     | CHEMBL1389690 | 0.431818 | 24400.0    |          |          |

\*\*\* ic50 ACTIVITY \*\*\* value prediction  
based on 7 locally validated fgps ---> 22781.988  
["substructure", "Pattern", "AP\_bits", "MFP1", "pubchem", "graph", "FP2"]

19 rank

Acetyl-CoA carboxylase 1 : Homo sapiens

score: 5.197 on CHEMBL3351 based on 7 fingerprints

| Fingerprint type | Ligand        | Tanimoto | Similarity | activity | Valid fg |
|------------------|---------------|----------|------------|----------|----------|
| FeatMFP1         | CHEMBL566681  | 0.727273 | 415.0      |          | *        |
| MFP1             | CHEMBL585885  | 0.642857 | 41.0       |          | *        |
| RDKit7           | CHEMBL568145  | 0.524862 | 36.0       |          |          |
| Pattern          | CHEMBL567934  | 0.896450 | 81.0       |          | *        |
| AP_bits          | CHEMBL567936  | 0.461300 | 17.0       |          |          |
| TT_bits          | CHEMBL568145  | 0.543860 | 36.0       |          | *        |
| FP2              | CHEMBL565418  | 0.628866 | 35.0       |          |          |
| hybridization    | CHEMBL566024  | 0.435737 | 35.0       |          |          |
| substructure     | CHEMBL1630706 | 0.812500 | 14600.0    |          |          |
| graph            | CHEMBL566025  | 0.600000 | 2770.0     |          |          |
| pubchem          | CHEMBL566862  | 0.885870 | 69.0       |          | *        |
| cdk_maccs        | CHEMBL585491  | 0.909091 | 49.0       |          | *        |
| klekota_roth     | CHEMBL585491  | 0.591837 | 49.0       |          | *        |

\*\*\* ic50 ACTIVITY \*\*\* value prediction  
based on 7 locally validated fgps ---> 1602.694  
["TT\_bits", "Pattern", "MFP1", "pubchem", "klekota\_roth", "FeatMFP1",  
"cdk\_maccs"]

20 rank

Epidermal growth factor receptor erbB1 : Homo sapiens  
score: 5.195 on ChEMBL203 based on 7 fingerprints

| Fingerprint type | Ligand        | Tanimoto Similarity | activity | Valid fg |
|------------------|---------------|---------------------|----------|----------|
| FeatMFP1         | CHEMBL143968  | 0.619048            | 1100.00  |          |
| MFP1             | CHEMBL3753836 | 0.531250            | 131.09   | *        |
| RDKit7           | CHEMBL143160  | 0.559006            | 5400.00  |          |
| Pattern          | CHEMBL142831  | 0.846154            | 10000.00 | *        |
| AP_bits          | CHEMBL186802  | 0.529595            | 5600.00  | *        |
| TT_bits          | CHEMBL55979   | 0.415094            | 400.00   |          |
| FP2              | CHEMBL143160  | 0.677778            | 5400.00  | *        |
| hybridization    | CHEMBL143160  | 0.608491            | 5400.00  |          |
| substructure     | CHEMBL186747  | 1.000000            | 3200.00  | *        |
| graph            | CHEMBL2336357 | 0.780488            | 9050.00  | *        |
| pubchem          | CHEMBL148514  | 0.830000            | 30500.00 | *        |
| cdk_maccs        | CHEMBL2336357 | 0.705882            | 9050.00  |          |
| klekota_roth     | CHEMBL3758278 | 0.450980            | 2.00     |          |

\*\*\* ic50 ACTIVITY \*\*\* value prediction

based on 6 locally validated fgps ---> 12761.728

["substructure", "Pattern", "AP\_bits", "MFP1", "graph", "FP2"]

21 rank

Signal transducer and activator of transcription 3 : Homo sapiens  
score: 5.180 on ChEMBL4026 based on 7 fingerprints

| Fingerprint type | Ligand        | Tanimoto Similarity | activity | Valid fg |
|------------------|---------------|---------------------|----------|----------|
| FeatMFP1         | CHEMBL1530735 | 0.636364            | 2106.0   |          |
| MFP1             | CHEMBL1447188 | 0.545455            | 16420.0  | *        |
| RDKit7           | CHEMBL1478316 | 0.396197            | 2157.0   |          |
| Pattern          | CHEMBL1427458 | 0.883281            | 5360.0   | *        |
| AP_bits          | CHEMBL1353939 | 0.500000            | 1298.0   | *        |
| TT_bits          | CHEMBL1478316 | 0.478261            | 2157.0   |          |
| FP2              | CHEMBL1427458 | 0.638298            | 5360.0   | *        |
| hybridization    | CHEMBL3133457 | 0.517606            | 52000.0  |          |
| substructure     | CHEMBL1530735 | 0.937500            | 2106.0   | *        |
| graph            | CHEMBL3133461 | 0.738636            | 33300.0  |          |
| pubchem          | CHEMBL1427458 | 0.875000            | 5360.0   | *        |
| cdk_maccs        | CHEMBL1427458 | 0.800000            | 5360.0   | *        |
| klekota_roth     | CHEMBL1339432 | 0.362069            | 3832.0   |          |

\*\*\* ic50 ACTIVITY \*\*\* value prediction

based on 6 locally validated fgps ---> 6426.275

["substructure", "Pattern", "AP\_bits", "MFP1", "pubchem", "FP2"]

22 rank

Vanilloid receptor : Homo sapiens

score: 5.174 on ChEMBL4794 based on 7 fingerprints

| Fingerprint type | Ligand        | Tanimoto Similarity | activity | Valid fg |
|------------------|---------------|---------------------|----------|----------|
| FeatMFP1         | CHEMBL214274  | 0.625000            | 62.0     |          |
| MFP1             | CHEMBL483866  | 0.629630            | 147.0    | *        |
| RDKit7           | CHEMBL3769572 | 0.468333            | 7110.0   |          |
| Pattern          | CHEMBL249943  | 0.855114            | 680.0    | *        |
| AP_bits          | CHEMBL483866  | 0.567227            | 147.0    | *        |
| TT_bits          | CHEMBL483866  | 0.510638            | 147.0    | *        |
| FP2              | CHEMBL400880  | 0.622807            | 370.0    |          |
| hybridization    | CHEMBL3769572 | 0.491379            | 7110.0   |          |
| substructure     | CHEMBL215015  | 0.933333            | 2585.0   | *        |
| graph            | CHEMBL195257  | 0.780488            | 140.0    | *        |
| pubchem          | CHEMBL215439  | 0.897297            | 974.0    | *        |
| cdk_maccs        | CHEMBL483866  | 0.735294            | 147.0    |          |
| klekota_roth     | CHEMBL231392  | 0.530612            | 749.0    |          |

\*\*\* ic50 ACTIVITY \*\*\* value prediction

based on 7 locally validated fgps ---> 1011.643

["TT\_bits", "substructure", "Pattern", "AP\_bits", "MFP1", "pubchem",  
"graph"]

23 rank

Estradiol 17-beta-dehydrogenase 2 : Homo sapiens

score: 5.129 on ChEMBL2789 based on 7 fingerprints

| Fingerprint type | Ligand        | Tanimoto Similarity | activity | Valid fg |
|------------------|---------------|---------------------|----------|----------|
| FeatMFP1         | CHEMBL3289858 | 0.666667            | 621.0    |          |
| MFP1             | CHEMBL3645224 | 0.607143            | 601.0    | *        |
| RDKit7           | CHEMBL1915937 | 0.645161            | 265.0    |          |
| Pattern          | CHEMBL1915936 | 0.903323            | 594.0    | *        |
| AP_bits          | CHEMBL1915937 | 0.538732            | 265.0    | *        |
| TT_bits          | CHEMBL3645223 | 0.416667            | 1760.0   |          |
| FP2              | CHEMBL1915935 | 0.744186            | 494.0    | *        |
| hybridization    | CHEMBL1915937 | 0.693694            | 265.0    | *        |
| substructure     | CHEMBL2324690 | 0.764706            | 58.0     |          |
| graph            | CHEMBL1915935 | 0.829268            | 494.0    | *        |
| pubchem          | CHEMBL1097417 | 0.823204            | 2970.0   |          |
| cdk_maccs        | CHEMBL1097417 | 0.812500            | 2970.0   | *        |
| klekota_roth     | CHEMBL1915935 | 0.431373            | 494.0    |          |

\*\*\* ic50 ACTIVITY \*\*\* value prediction

based on 7 locally validated fgps ---> 875.823

["Pattern", "AP\_bits", "MFP1", "graph", "FP2", "cdk\_maccs",  
"hybridization"]

24 rank

Cytochrome P450 2C9 : Homo sapiens

score: 5.020 on ChEMBL3397 based on 7 fingerprints

| Fingerprint type | Ligand        | Tanimoto Similarity | activity | Valid fg |
|------------------|---------------|---------------------|----------|----------|
| FeatMFP1         | CHEMBL271622  | 0.714286            | 39000.0  | *        |
| MFP1             | CHEMBL598336  | 0.562500            | 16000.0  | *        |
| RDKit7           | CHEMBL598336  | 0.486150            | 16000.0  |          |
| Pattern          | CHEMBL560537  | 0.855799            | 30000.0  | *        |
| AP_bits          | CHEMBL2332097 | 0.488294            | 600.0    | *        |
| TT_bits          | CHEMBL485968  | 0.388889            | 3000.0   |          |
| FP2              | CHEMBL598336  | 0.642202            | 16000.0  | *        |
| hybridization    | CHEMBL10188   | 0.578947            | 2000.0   |          |
| substructure     | CHEMBL2348850 | 0.882353            | 16000.0  | *        |
| graph            | CHEMBL1650646 | 0.684783            | 224.0    |          |
| pubchem          | CHEMBL598336  | 0.875000            | 16000.0  | *        |
| cdk_maccs        | CHEMBL3822473 | 0.756757            | 5030.0   |          |
| klekota_roth     | CHEMBL2017287 | 0.510204            | 1300.0   |          |

\*\*\* ic50 ACTIVITY \*\*\* value prediction

based on 7 locally validated fgps ---> 15476.314

["substructure", "Pattern", "AP\_bits", "MFP1", "pubchem", "FP2",  
"FeatMFP1"]

# SwissTargetPrediction report:

## Reference:

Gfeller D., Michielin O. & Zoete V.  
 Shaping the interaction landscape of  
 bioactive molecules, *Bioinformatics*  
 (2013) 29:3073-3079.

## Query Molecule

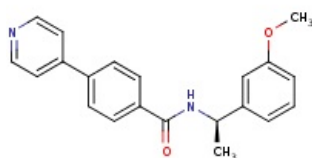

## Frequency of Target Class

| Target                                                | Uniprot ID | Gene code | ChEMBL ID     | Probability            | # sim. cmpds (3D / 2D) | Target Class   |
|-------------------------------------------------------|------------|-----------|---------------|------------------------|------------------------|----------------|
| Corticosteroid 11-beta-dehydrogenase isozyme 2        | P80365     | HSD11B2   | CHEMBL3746    | <div><div></div></div> | 39 / 16                | Enzyme         |
| Rho-associated protein kinase 2                       | O75116     | ROCK2     | CHEMBL2973    | <div><div></div></div> | 159 / 41               | Ser_Thr Kinase |
| Rho-associated protein kinase 1                       | Q13464     | ROCK1     | CHEMBL3231    | <div><div></div></div> | 159 / 41               | Ser_Thr Kinase |
| Estradiol 17-beta-dehydrogenase 2                     | P37059     | HSD17B2   | CHEMBL2789    | <div><div></div></div> | 13 / 16                | Enzyme         |
| Epidermal growth factor receptor                      | P00533     | EGFR      | CHEMBL203     | <div><div></div></div> | 156 / 10               | Tyr Kinase     |
| Receptor tyrosine-protein kinase erbB-2               | P04626     | ERBB2     | CHEMBL1824    | <div><div></div></div> | 156 / 9                | Tyr Kinase     |
| Receptor tyrosine-protein kinase erbB-3 (by homology) | P21860     | ERBB3     | CHEMBL5838    | <div><div></div></div> | 156 / 9                | Tyr Kinase     |
| ERBB4 intracellular domain (by homology)              | Q15303     | ERBB4     | CHEMBL3009    | <div><div></div></div> | 156 / 9                | Tyr Kinase     |
| Mitogen-activated protein kinase 11 (by homology)     | Q15759     | MAPK11    | CHEMBL3961    | <div><div></div></div> | 435 / 48               | Ser_Thr Kinase |
| Mitogen-activated protein kinase 14                   | Q16539     | MAPK14    | CHEMBL260     | <div><div></div></div> | 435 / 48               | Ser_Thr Kinase |
| Muscleblind-like protein 1                            | Q9NR56     | MBNL1     | CHEMBL1293317 | <div><div></div></div> | 709 / 67               | Unclassified   |
| Muscleblind-like protein 2 (by homology)              | Q5VZF2     | MBNL2     |               | <div><div></div></div> | 709 / 67               | Unclassified   |
| Muscleblind-like protein 3 (by homology)              | Q9NUK0     | MBNL3     |               | <div><div></div></div> | 709 / 67               | Unclassified   |
| Mitogen-activated protein kinase 8 (by homology)      | P45983     | MAPK8     | CHEMBL2276    | <div><div></div></div> | 425 / 48               | Ser_Thr Kinase |
| Mitogen-activated protein kinase 9 (by homology)      | P45984     | MAPK9     | CHEMBL4179    | <div><div></div></div> | 425 / 48               | Ser_Thr Kinase |



## Polypharmacology Browser 2 Prediction:

Targets predicted using NN(ECfp4) + NB(ECfp4).

Save Table

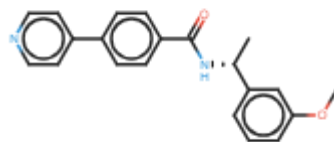

Query molecule

Target class overview

● Enzyme

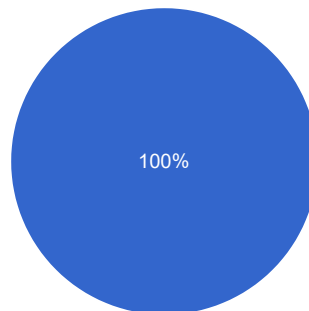

| Rank | ChEMBL ID                                                                                                                                     | Common name                                           | Nearest neighbours |
|------|-----------------------------------------------------------------------------------------------------------------------------------------------|-------------------------------------------------------|--------------------|
| 1    | CHEMBL3231<br>( <a href="https://www.ebi.ac.uk/chembl/target/inspect/CHEMBL3231">https://www.ebi.ac.uk/chembl/target/inspect/CHEMBL3231</a> ) | Rho-associated protein kinase 1                       | Show NN            |
| 2    | CHEMBL262 ( <a href="https://www.ebi.ac.uk/chembl/target/inspect/CHEMBL262">https://www.ebi.ac.uk/chembl/target/inspect/CHEMBL262</a> )       | Glycogen synthase kinase-3 beta                       | Show NN            |
| 3    | CHEMBL4101<br>( <a href="https://www.ebi.ac.uk/chembl/target/inspect/CHEMBL4101">https://www.ebi.ac.uk/chembl/target/inspect/CHEMBL4101</a> ) | cAMP-dependent protein kinase alpha-catalytic subunit | Show NN            |
| 4    | CHEMBL2850<br>( <a href="https://www.ebi.ac.uk/chembl/target/inspect/CHEMBL2850">https://www.ebi.ac.uk/chembl/target/inspect/CHEMBL2850</a> ) | Glycogen synthase kinase-3 alpha                      | Show NN            |
| 5    | CHEMBL4203<br>( <a href="https://www.ebi.ac.uk/chembl/target/inspect/CHEMBL4203">https://www.ebi.ac.uk/chembl/target/inspect/CHEMBL4203</a> ) | Dual specificity protein kinase CLK4                  | Show NN            |
| 6    | CHEMBL2973<br>( <a href="https://www.ebi.ac.uk/chembl/target/inspect/CHEMBL2973">https://www.ebi.ac.uk/chembl/target/inspect/CHEMBL2973</a> ) | Rho-associated protein kinase 2                       | Show NN            |
| 7    | CHEMBL5818<br>( <a href="https://www.ebi.ac.uk/chembl/target/inspect/CHEMBL5818">https://www.ebi.ac.uk/chembl/target/inspect/CHEMBL5818</a> ) | Serine/threonine-protein kinase PRKX                  | Show NN            |
| 8    | CHEMBL3032<br>( <a href="https://www.ebi.ac.uk/chembl/target/inspect/CHEMBL3032">https://www.ebi.ac.uk/chembl/target/inspect/CHEMBL3032</a> ) | Protein kinase N2                                     | Show NN            |
| 9    | CHEMBL4273<br>( <a href="https://www.ebi.ac.uk/chembl/target/inspect/CHEMBL4273">https://www.ebi.ac.uk/chembl/target/inspect/CHEMBL4273</a> ) | cGMP-dependent protein kinase 1 beta                  | Show NN            |
| 10   | CHEMBL4040<br>( <a href="https://www.ebi.ac.uk/chembl/target/inspect/CHEMBL4040">https://www.ebi.ac.uk/chembl/target/inspect/CHEMBL4040</a> ) | MAP kinase ERK2                                       | Show NN            |
| 11   | CHEMBL5794<br>( <a href="https://www.ebi.ac.uk/chembl/target/inspect/CHEMBL5794">https://www.ebi.ac.uk/chembl/target/inspect/CHEMBL5794</a> ) | Serine/threonine-protein kinase Sgk2                  | Show NN            |
| 12   | CHEMBL4501<br>( <a href="https://www.ebi.ac.uk/chembl/target/inspect/CHEMBL4501">https://www.ebi.ac.uk/chembl/target/inspect/CHEMBL4501</a> ) | Ribosomal protein S6 kinase 1                         | Show NN            |
| 13   | CHEMBL2996<br>( <a href="https://www.ebi.ac.uk/chembl/target/inspect/CHEMBL2996">https://www.ebi.ac.uk/chembl/target/inspect/CHEMBL2996</a> ) | Protein kinase C delta                                | Show NN            |

|    |                                                                                                                                               |                                                         |         |
|----|-----------------------------------------------------------------------------------------------------------------------------------------------|---------------------------------------------------------|---------|
| 14 | CHEMBL301 ( <a href="https://www.ebi.ac.uk/chembl/target/inspect/CHEMBL301">https://www.ebi.ac.uk/chembl/target/inspect/CHEMBL301</a> )       | Cyclin-dependent kinase 2                               | Show NN |
| 15 | CHEMBL2896<br>( <a href="https://www.ebi.ac.uk/chembl/target/inspect/CHEMBL2896">https://www.ebi.ac.uk/chembl/target/inspect/CHEMBL2896</a> ) | cGMP-dependent protein kinase 2                         | Show NN |
| 16 | CHEMBL4516<br>( <a href="https://www.ebi.ac.uk/chembl/target/inspect/CHEMBL4516">https://www.ebi.ac.uk/chembl/target/inspect/CHEMBL4516</a> ) | Serine/threonine-protein kinase MRCK-A                  | Show NN |
| 17 | CHEMBL2345<br>( <a href="https://www.ebi.ac.uk/chembl/target/inspect/CHEMBL2345">https://www.ebi.ac.uk/chembl/target/inspect/CHEMBL2345</a> ) | Ribosomal protein S6 kinase alpha 3                     | Show NN |
| 18 | CHEMBL4282<br>( <a href="https://www.ebi.ac.uk/chembl/target/inspect/CHEMBL4282">https://www.ebi.ac.uk/chembl/target/inspect/CHEMBL4282</a> ) | Serine/threonine-protein kinase AKT                     | Show NN |
| 19 | CHEMBL2938<br>( <a href="https://www.ebi.ac.uk/chembl/target/inspect/CHEMBL2938">https://www.ebi.ac.uk/chembl/target/inspect/CHEMBL2938</a> ) | Protein kinase C gamma                                  | Show NN |
| 20 | CHEMBL6166<br>( <a href="https://www.ebi.ac.uk/chembl/target/inspect/CHEMBL6166">https://www.ebi.ac.uk/chembl/target/inspect/CHEMBL6166</a> ) | Mitogen-activated protein kinase kinase kinase kinase 4 | Show NN |
