# Supplementary material for: Accelerating Drug Discovery by Early Protein Drug Target Prediction Based on a Multi-Fingerprint Similarity Search
Source: MDPI journal article supplement (doi:10.3390/molecules24122233), 2019-06-14
Supplement: s1 [file s1]

**MuSSel not predicted**

# SwissTargetPrediction report:

## Reference:

Gfeller D., Michielin O. & Zoete V.  
 Shaping the interaction landscape of  
 bioactive molecules, *Bioinformatics*  
 (2013) 29:3073-3079.

## Query Molecule

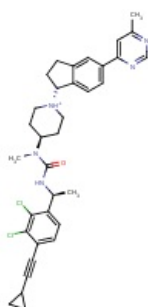

## Frequency of Target Class

| Target                                                             | Uniprot ID | Gene code | ChEMBL ID     | Probability            | # sim. cmpds (3D / 2D) | Target Class      |
|--------------------------------------------------------------------|------------|-----------|---------------|------------------------|------------------------|-------------------|
| C-C chemokine receptor type 1<br>(by homology)                     | P32246     | CCR1      | CHEMBL2413    | <div><div></div></div> | 560 / 47               | Membrane receptor |
| C-C chemokine receptor type 2<br>(by homology)                     | P41597     | CCR2      | CHEMBL4015    | <div><div></div></div> | 571 / 47               | Membrane receptor |
| C-C chemokine receptor type 3<br>(by homology)                     | P51677     | CCR3      | CHEMBL3473    | <div><div></div></div> | 560 / 47               | Membrane receptor |
| C-C chemokine receptor type 5                                      | P51681     | CCR5      | CHEMBL274     | <div><div></div></div> | 571 / 47               | Membrane receptor |
| C-C chemokine receptor-like 2 (by homology)                        | C9JP23     | CCRL2     |               | <div><div></div></div> | 532 / 47               | Membrane receptor |
| Potassium voltage-gated channel subfamily H member 2               | Q12809     | KCNH2     | CHEMBL240     | <div><div></div></div> | 327 / 13               | Ion channel       |
| Potassium voltage-gated channel subfamily H member 6 (by homology) | Q9H252     | KCNH6     |               | <div><div></div></div> | 327 / 13               | Ion channel       |
| Potassium voltage-gated channel subfamily H member 7 (by homology) | Q9NS40     | KCNH7     |               | <div><div></div></div> | 327 / 13               | Ion channel       |
| D(2) dopamine receptor                                             | P14416     | DRD2      | CHEMBL217     | <div><div></div></div> | 1112 / 2               | Membrane receptor |
| D(3) dopamine receptor                                             | P35462     | DRD3      | CHEMBL234     | <div><div></div></div> | 748 / 1                | Membrane receptor |
| D(4) dopamine receptor                                             | P21917     | DRD4      | CHEMBL219     | <div><div></div></div> | 430 / 1                | Membrane receptor |
| RANTES(4-68)                                                       | P13501     | CCL5      | CHEMBL1275217 | <div><div></div></div> | 21 / 4                 | Unclassified      |
| C-C motif chemokine 16 (by homology)                               | O15467     | CCL16     |               | <div><div></div></div> | 21 / 4                 | Unclassified      |
| MIP-1-alpha(4-69) (by homology)                                    | P10147     | CCL3      |               | <div><div></div></div> | 21 / 4                 | Unclassified      |
| MIP-1-beta(3-69) (by homology)                                     | P13236     | CCL4      |               | <div><div></div></div> | 21 / 4                 | Unclassified      |

**Polypharmacology Browser 2 not predicted**
