# Supplementary material for: Accelerating Drug Discovery by Early Protein Drug Target Prediction Based on a Multi-Fingerprint Similarity Search
Source: MDPI journal article supplement (doi:10.3390/molecules24122233), 2019-06-14
Supplement: s1 [file s1]

## MuSSEL Prediction IC<sub>50</sub>:

1 rank

Tyrosine-protein kinase SRC : Homo sapiens

score: 6.857 on ChEMBL267 based on 10 fingerprints

| Fingerprint type | Ligand        | Tanimoto | Similarity | activity | Valid fg |
|------------------|---------------|----------|------------|----------|----------|
| FeatMFP1         | CHEMBL355269  |          | 0.735294   | 63.1     | *        |
| MFP1             | CHEMBL168656  |          | 0.584906   | 270.0    | *        |
| RDKit7           | CHEMBL355891  |          | 0.748187   | 50.0     | *        |
| Pattern          | CHEMBL169043  |          | 0.811350   | 24.0     |          |
| AP_bits          | CHEMBL352619  |          | 0.517544   | 400.0    | *        |
| TT_bits          | CHEMBL168656  |          | 0.592105   | 270.0    | *        |
| FP2              | CHEMBL168656  |          | 0.669856   | 270.0    | *        |
| hybridization    | CHEMBL169043  |          | 0.671031   | 24.0     | *        |
| substructure     | CHEMBL1873475 |          | 0.739130   | 262.6    |          |
| graph            | CHEMBL395665  |          | 0.565217   | 19700.0  |          |
| pubchem          | CHEMBL168656  |          | 0.833333   | 270.0    | *        |
| cdk_maccs        | CHEMBL395664  |          | 0.833333   | 14400.0  | *        |
| klekota_roth     | CHEMBL1873475 |          | 0.671053   | 262.6    | *        |

\*\*\* ic50 ACTIVITY \*\*\* value prediction

based on 10 locally validated fgps ---> 1888.354

["TT\_bits", "cdk\_maccs", "AP\_bits", "MFP1", "klekota\_roth", "pubchem", "FP2", "FeatMFP1", "RDKit7", "hybridization"]

2 rank

Epidermal growth factor receptor erbB1 : Homo sapiens

score: 6.812 on ChEMBL203 based on 10 fingerprints

| Fingerprint type | Ligand        | Tanimoto | Similarity | activity | Valid fg |
|------------------|---------------|----------|------------|----------|----------|
| FeatMFP1         | CHEMBL355269  |          | 0.735294   | 750.0    | *        |
| MFP1             | CHEMBL168656  |          | 0.584906   | 2100.0   | *        |
| RDKit7           | CHEMBL355891  |          | 0.748187   | 830.0    | *        |
| Pattern          | CHEMBL168656  |          | 0.801858   | 2100.0   |          |
| AP_bits          | CHEMBL355891  |          | 0.511312   | 830.0    | *        |
| TT_bits          | CHEMBL168656  |          | 0.592105   | 2100.0   | *        |
| FP2              | CHEMBL168656  |          | 0.669856   | 2100.0   | *        |
| hybridization    | CHEMBL168656  |          | 0.653846   | 2100.0   | *        |
| substructure     | CHEMBL1272222 |          | 0.772727   | 20.0     |          |
| graph            | CHEMBL3416437 |          | 0.641221   | 153.0    |          |
| pubchem          | CHEMBL168656  |          | 0.833333   | 2100.0   | *        |
| cdk_maccs        | CHEMBL3647970 |          | 0.802817   | 48.8     | *        |
| klekota_roth     | CHEMBL3647973 |          | 0.680000   | 60.9     | *        |

\*\*\* ic50 ACTIVITY \*\*\* value prediction

based on 10 locally validated fgps ---> 1057.807

["TT\_bits", "cdk\_maccs", "AP\_bits", "MFP1", "klekota\_roth", "pubchem", "FP2", "FeatMFP1", "RDKit7", "hybridization"]

3 rank

Fibroblast growth factor receptor 2 : Homo sapiens

score: 6.388 on ChEMBL4142 based on 9 fingerprints

| Fingerprint type | Ligand        | Tanimoto | Similarity | activity | Valid fg |
|------------------|---------------|----------|------------|----------|----------|
| FeatMFP1         | CHEMBL3701258 |          | 0.750000   | 0.4      | *        |
| MFP1             | CHEMBL3701258 |          | 0.607843   | 0.4      | *        |
| RDKit7           | CHEMBL3701278 |          | 0.689006   | 0.3      | *        |
| Pattern          | CHEMBL3701259 |          | 0.846034   | 3.2      | *        |
| AP_bits          | CHEMBL3701258 |          | 0.531915   | 0.4      | *        |
| TT_bits          | CHEMBL3701258 |          | 0.608108   | 0.4      | *        |
| FP2              | CHEMBL3701258 |          | 0.585586   | 0.4      |          |
| hybridization    | CHEMBL3701258 |          | 0.650238   | 0.4      | *        |
| substructure     | CHEMBL3701240 |          | 0.791667   | 6.9      |          |
| graph            | CHEMBL3701258 |          | 0.656250   | 0.4      |          |
| pubchem          | CHEMBL3701259 |          | 0.796610   | 3.2      |          |
| cdk_maccs        | CHEMBL3701258 |          | 0.861538   | 0.4      | *        |

```

    klekota_roth CHEMBL3701258          0.842857      0.4      *
    *** ic50 ACTIVITY *** value prediction
    based on 9 locally validated fgps ---> 3.089
    ["TT_bits", "cdk_maccs", "Pattern", "MFP1", "klekota_roth", "AP_bits",
    "FeatMFP1", "RDKit7", "hybridization"]

```

4 rank

Tyrosine-protein kinase SRC : Gallus gallus

score: 6.141 on ChEMBL3655 based on 9 fingerprints

| Fingerprint type | Ligand       | Tanimoto Similarity | activity | Valid fg |
|------------------|--------------|---------------------|----------|----------|
| FeatMFP1         | CHEMBL168382 | 0.733333            | 2.0      | *        |
| MFP1             | CHEMBL168656 | 0.584906            | 4400.0   | *        |
| RDKit7           | CHEMBL355019 | 0.738929            | 700.0    | *        |
| Pattern          | CHEMBL169043 | 0.811350            | 3300.0   |          |
| AP_bits          | CHEMBL352619 | 0.517544            | 400.0    | *        |
| TT_bits          | CHEMBL168656 | 0.592105            | 4400.0   | *        |
| FP2              | CHEMBL168656 | 0.669856            | 4400.0   | *        |
| hybridization    | CHEMBL169043 | 0.671031            | 3300.0   | *        |
| substructure     | CHEMBL168382 | 0.681818            | 2.0      |          |
| graph            | CHEMBL169043 | 0.537594            | 3300.0   |          |
| pubchem          | CHEMBL168656 | 0.833333            | 4400.0   | *        |
| cdk_maccs        | CHEMBL168656 | 0.800000            | 4400.0   | *        |
| klekota_roth     | CHEMBL168656 | 0.516854            | 4400.0   |          |

```

    *** ic50 ACTIVITY *** value prediction
    based on 8 locally validated fgps ---> 2500.662
    ["TT_bits", "AP_bits", "MFP1", "pubchem", "FP2", "FeatMFP1", "RDKit7",
    "hybridization"]

```

5 rank

Tyrosine-protein kinase LCK : Homo sapiens

score: 5.131 on ChEMBL258 based on 8 fingerprints

| Fingerprint type | Ligand        | Tanimoto Similarity | activity | Valid fg |
|------------------|---------------|---------------------|----------|----------|
| FeatMFP1         | CHEMBL66102   | 0.709677            | 6.0      | *        |
| MFP1             | CHEMBL262276  | 0.528302            | 290.0    | *        |
| RDKit7           | CHEMBL297278  | 0.698466            | 240.0    | *        |
| Pattern          | CHEMBL3786567 | 0.787834            | 7400.0   |          |
| AP_bits          | CHEMBL1873475 | 0.494929            | 2.0      | *        |
| TT_bits          | CHEMBL172514  | 0.545455            | 620.0    | *        |
| FP2              | CHEMBL297278  | 0.640000            | 240.0    | *        |
| hybridization    | CHEMBL3786167 | 0.588509            | 4900.0   |          |
| substructure     | CHEMBL1873475 | 0.739130            | 2.0      |          |
| graph            | CHEMBL397143  | 0.582707            | 20800.0  |          |
| pubchem          | CHEMBL297278  | 0.791304            | 240.0    |          |
| cdk_maccs        | CHEMBL233540  | 0.842857            | 2950.0   | *        |
| klekota_roth     | CHEMBL1873475 | 0.671053            | 2.0      | *        |

```

    *** ic50 ACTIVITY *** value prediction
    based on 8 locally validated fgps ---> 352.557
    ["TT_bits", "AP_bits", "MFP1", "klekota_roth", "FP2", "FeatMFP1",
    "RDKit7", "cdk_maccs"]

```

# SwissTargetPrediction report:

## Reference:

Gfeller D., Michielin O. & Zoete V.  
Shaping the interaction landscape of  
bioactive molecules, *Bioinformatics*  
(2013) 29:3073-3079.

## Query Molecule

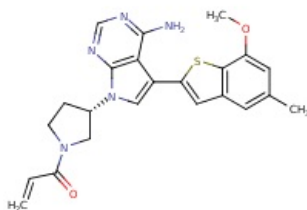

## Frequency of Target Class

| Target                                                         | Uniprot ID | Gene code | ChEMBL ID  | Probability            | # sim. cmpds (3D / 2D) | Target Class |
|----------------------------------------------------------------|------------|-----------|------------|------------------------|------------------------|--------------|
| Tyrosine-protein kinase Lck                                    | P06239     | LCK       | CHEMBL258  | <div><div></div></div> | 117 / 53               | Tyr Kinase   |
| Tyrosine-protein kinase Lyn ( <i>by homology</i> )             | P07948     | LYN       | CHEMBL3905 | <div><div></div></div> | 117 / 53               | Tyr Kinase   |
| Tyrosine-protein kinase HCK ( <i>by homology</i> )             | P08631     | HCK       | CHEMBL3234 | <div><div></div></div> | 117 / 53               | Tyr Kinase   |
| Tyrosine-protein kinase Blk ( <i>by homology</i> )             | P51451     | BLK       | CHEMBL2250 | <div><div></div></div> | 117 / 53               | Tyr Kinase   |
| Epidermal growth factor receptor                               | P00533     | EGFR      | CHEMBL203  | <div><div></div></div> | 134 / 46               | Tyr Kinase   |
| Receptor tyrosine-protein kinase erbB-2                        | P04626     | ERBB2     | CHEMBL1824 | <div><div></div></div> | 133 / 46               | Tyr Kinase   |
| ERBB4 intracellular domain ( <i>by homology</i> )              | Q15303     | ERBB4     | CHEMBL3009 | <div><div></div></div> | 133 / 46               | Tyr Kinase   |
| Receptor tyrosine-protein kinase erbB-3 ( <i>by homology</i> ) | P21860     | ERBB3     | CHEMBL5838 | <div><div></div></div> | 133 / 46               | Tyr Kinase   |
| Tyrosine-protein kinase Fyn ( <i>by homology</i> )             | P06241     | FYN       | CHEMBL1841 | <div><div></div></div> | 82 / 122               | Tyr Kinase   |
| Tyrosine-protein kinase Yes ( <i>by homology</i> )             | P07947     | YES1      | CHEMBL2073 | <div><div></div></div> | 82 / 122               | Tyr Kinase   |
| Tyrosine-protein kinase Fgr ( <i>by homology</i> )             | P09769     | FGR       | CHEMBL4454 | <div><div></div></div> | 82 / 122               | Tyr Kinase   |
| Proto-oncogene tyrosine-protein kinase Src                     | P12931     | SRC       | CHEMBL267  | <div><div></div></div> | 82 / 122               | Tyr Kinase   |
| Tyrosine-protein kinase FRK ( <i>by homology</i> )             | P42685     | FRK       | CHEMBL4223 | <div><div></div></div> | 82 / 122               | Tyr Kinase   |
| Macrophage colony-stimulating factor 1 receptor                | P07333     | CSF1R     | CHEMBL1844 | <div><div></div></div> | 134 / 3                | Tyr Kinase   |
| Mast/stem cell growth factor receptor Kit                      | P10721     | KIT       | CHEMBL1936 | <div><div></div></div> | 134 / 3                | Tyr Kinase   |

# Polypharmacology Browser 2 Prediction:

Targets predicted using NN(ECfp4) + NB(ECfp4).

Save Table

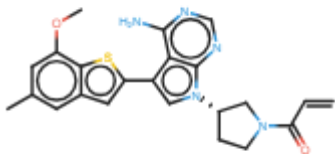

Query molecule

Target class overview

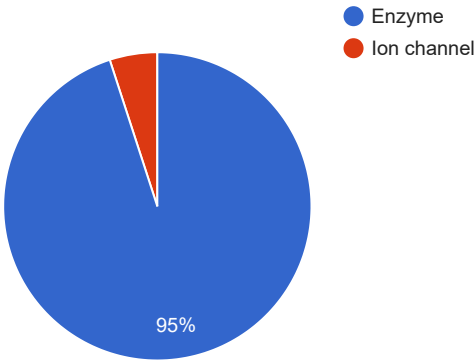

| Rank | ChEMBL ID                                                                                                                                  | Common name                                   | Nearest neighbours |
|------|--------------------------------------------------------------------------------------------------------------------------------------------|-----------------------------------------------|--------------------|
| 1    | CHEMBL203 ( <a href="https://www.ebi.ac.uk/chembl/target/inspect/CHEMBL203">https://www.ebi.ac.uk/chembl/target/inspect/CHEMBL203</a> )    | Epidermal growth factor receptor erbB1        | Show NN            |
| 2    | CHEMBL267 ( <a href="https://www.ebi.ac.uk/chembl/target/inspect/CHEMBL267">https://www.ebi.ac.uk/chembl/target/inspect/CHEMBL267</a> )    | Tyrosine-protein kinase SRC                   | Show NN            |
| 3    | CHEMBL279 ( <a href="https://www.ebi.ac.uk/chembl/target/inspect/CHEMBL279">https://www.ebi.ac.uk/chembl/target/inspect/CHEMBL279</a> )    | Vascular endothelial growth factor receptor 2 | Show NN            |
| 4    | CHEMBL3650 ( <a href="https://www.ebi.ac.uk/chembl/target/inspect/CHEMBL3650">https://www.ebi.ac.uk/chembl/target/inspect/CHEMBL3650</a> ) | Fibroblast growth factor receptor 1           | Show NN            |
| 5    | CHEMBL4128 ( <a href="https://www.ebi.ac.uk/chembl/target/inspect/CHEMBL4128">https://www.ebi.ac.uk/chembl/target/inspect/CHEMBL4128</a> ) | Tyrosine-protein kinase TIE-2                 | Show NN            |
| 6    | CHEMBL258 ( <a href="https://www.ebi.ac.uk/chembl/target/inspect/CHEMBL258">https://www.ebi.ac.uk/chembl/target/inspect/CHEMBL258</a> )    | Tyrosine-protein kinase LCK                   | Show NN            |
| 7    | CHEMBL1981 ( <a href="https://www.ebi.ac.uk/chembl/target/inspect/CHEMBL1981">https://www.ebi.ac.uk/chembl/target/inspect/CHEMBL1981</a> ) | Insulin receptor                              | Show NN            |
| 8    | CHEMBL1957 ( <a href="https://www.ebi.ac.uk/chembl/target/inspect/CHEMBL1957">https://www.ebi.ac.uk/chembl/target/inspect/CHEMBL1957</a> ) | Insulin-like growth factor I receptor         | Show NN            |
| 9    | CHEMBL3905 ( <a href="https://www.ebi.ac.uk/chembl/target/inspect/CHEMBL3905">https://www.ebi.ac.uk/chembl/target/inspect/CHEMBL3905</a> ) | Tyrosine-protein kinase Lyn                   | Show NN            |
| 10   | CHEMBL2742 ( <a href="https://www.ebi.ac.uk/chembl/target/inspect/CHEMBL2742">https://www.ebi.ac.uk/chembl/target/inspect/CHEMBL2742</a> ) | Fibroblast growth factor receptor 3           | Show NN            |
| 11   | CHEMBL4142 ( <a href="https://www.ebi.ac.uk/chembl/target/inspect/CHEMBL4142">https://www.ebi.ac.uk/chembl/target/inspect/CHEMBL4142</a> ) | Fibroblast growth factor receptor 2           | Show NN            |
| 12   | CHEMBL2959 ( <a href="https://www.ebi.ac.uk/chembl/target/inspect/CHEMBL2959">https://www.ebi.ac.uk/chembl/target/inspect/CHEMBL2959</a> ) | Tyrosine-protein kinase ITK/TSK               | Show NN            |
| 13   | CHEMBL240 ( <a href="https://www.ebi.ac.uk/chembl/target/inspect/CHEMBL240">https://www.ebi.ac.uk/chembl/target/inspect/CHEMBL240</a> )    | HERG                                          | Show NN            |
| 14   | CHEMBL2185 ( <a href="https://www.ebi.ac.uk/chembl/target/inspect/CHEMBL2185">https://www.ebi.ac.uk/chembl/target/inspect/CHEMBL2185</a> ) | Serine/threonine-protein kinase Aurora-B      | Show NN            |
| 15   | CHEMBL2148 ( <a href="https://www.ebi.ac.uk/chembl/target/inspect/CHEMBL2148">https://www.ebi.ac.uk/chembl/target/inspect/CHEMBL2148</a> ) | Tyrosine-protein kinase JAK3                  | Show NN            |
| 16   | CHEMBL3835 ( <a href="https://www.ebi.ac.uk/chembl/target/inspect/CHEMBL3835">https://www.ebi.ac.uk/chembl/target/inspect/CHEMBL3835</a> ) | Serine/threonine-protein kinase NEK2          | Show NN            |
| 17   | CHEMBL5251 ( <a href="https://www.ebi.ac.uk/chembl/target/inspect/CHEMBL5251">https://www.ebi.ac.uk/chembl/target/inspect/CHEMBL5251</a> ) | Tyrosine-protein kinase BTK                   | Show NN            |
| 18   | CHEMBL1974 ( <a href="https://www.ebi.ac.uk/chembl/target/inspect/CHEMBL1974">https://www.ebi.ac.uk/chembl/target/inspect/CHEMBL1974</a> ) | Tyrosine-protein kinase receptor FLT3         | Show NN            |

|    |                                                                                                                                            |                               |         |
|----|--------------------------------------------------------------------------------------------------------------------------------------------|-------------------------------|---------|
| 19 | CHEMBL3267 ( <a href="https://www.ebi.ac.uk/chembl/target/inspect/CHEMBL3267">https://www.ebi.ac.uk/chembl/target/inspect/CHEMBL3267</a> ) | PI3-kinase p110-gamma subunit | Show NN |
| 20 | CHEMBL1862 ( <a href="https://www.ebi.ac.uk/chembl/target/inspect/CHEMBL1862">https://www.ebi.ac.uk/chembl/target/inspect/CHEMBL1862</a> ) | Tyrosine-protein kinase ABL   | Show NN |
