# Supplementary material for: Accelerating Drug Discovery by Early Protein Drug Target Prediction Based on a Multi-Fingerprint Similarity Search
Source: MDPI journal article supplement (doi:10.3390/molecules24122233), 2019-06-14
Supplement: s1 [file s1]

## MuSSel Prediction k<sub>i</sub>:

1 rank

Mitogen-activated protein kinase kinase kinase 12 : Homo sapiens

score: 4.006 on ChEMBL1908389 based on 5 fingerprints

| Fingerprint type | Ligand        | Tanimoto Similarity | activity | Valid fg |
|------------------|---------------|---------------------|----------|----------|
| FeatMFP1         | CHEMBL3730276 | 0.703704            | 4.63     |          |
| MFP1             | CHEMBL3715814 | 0.552632            | 12.00    |          |
| RDKit7           | CHEMBL3728787 | 0.552040            | 130.00   |          |
| Pattern          | CHEMBL3729398 | 0.824089            | 210.00   |          |
| AP_bits          | CHEMBL3728787 | 0.596923            | 130.00   | *        |
| TT_bits          | CHEMBL3728787 | 0.414634            | 130.00   |          |
| FP2              | CHEMBL3729749 | 0.614213            | 137.00   |          |
| hybridization    | CHEMBL3728787 | 0.674731            | 130.00   |          |
| substructure     | CHEMBL3727745 | 1.000000            | 650.00   | *        |
| graph            | CHEMBL3728787 | 0.800000            | 130.00   |          |
| pubchem          | CHEMBL3730820 | 0.874286            | 220.00   | *        |
| cdk_maccs        | CHEMBL3728787 | 0.851852            | 130.00   | *        |
| klekota_roth     | CHEMBL3730148 | 0.682540            | 1360.00  | *        |

\*\*\* ki ACTIVITY \*\*\* value prediction

based on 5 locally validated fgps ---> 365.364

["AP\_bits", "cdk\_maccs", "klekota\_roth", "substructure", "pubchem"]

## MuSSEL Prediction IC<sub>50</sub>:

1 rank

PI3-kinase p110-alpha subunit : Homo sapiens

score: 8.198 on ChEMBL4005 based on 11 fingerprints

| Fingerprint type | Ligand        | Tanimoto Similarity | activity | Valid fg |
|------------------|---------------|---------------------|----------|----------|
| FeatMFP1         | CHEMBL2017974 | 0.720000            | 30.0     | *        |
| MFP1             | CHEMBL2017974 | 0.472222            | 30.0     |          |
| RDKit7           | CHEMBL1258517 | 0.667313            | 8.0      |          |
| Pattern          | CHEMBL1091596 | 0.866667            | 253.0    | *        |
| AP_bits          | CHEMBL2017974 | 0.533898            | 30.0     | *        |
| TT_bits          | CHEMBL1092394 | 0.493671            | 226.0    | *        |
| FP2              | CHEMBL1258517 | 0.646707            | 8.0      | *        |
| hybridization    | CHEMBL1258517 | 0.736196            | 8.0      | *        |
| substructure     | CHEMBL1672330 | 0.923077            | 13.0     | *        |
| graph            | CHEMBL1258517 | 0.789474            | 8.0      | *        |
| pubchem          | CHEMBL2017974 | 0.877907            | 30.0     | *        |
| cdk_maccs        | CHEMBL3736010 | 0.910714            | 220.0    | *        |
| klekota_roth     | CHEMBL3601897 | 0.700000            | 2200.0   | *        |

\*\*\* ic50 ACTIVITY \*\*\* value prediction

based on 11 locally validated fgps ---> 253.529

["TT\_bits", "substructure", "Pattern", "AP\_bits", "klekota\_roth",  
"pubchem", "graph", "FP2", "FeatMFP1", "cdk\_maccs", "hybridization"]

2 rank

Serine/threonine-protein kinase mTOR : Homo sapiens

score: 8.103 on ChEMBL2842 based on 11 fingerprints

| Fingerprint type | Ligand        | Tanimoto Similarity | activity | Valid fg |
|------------------|---------------|---------------------|----------|----------|
| FeatMFP1         | CHEMBL2017974 | 0.720000            | 4600.00  | *        |
| MFP1             | CHEMBL2017974 | 0.472222            | 4600.00  |          |
| RDKit7           | CHEMBL1258517 | 0.667313            | 0.42     |          |
| Pattern          | CHEMBL1091596 | 0.866667            | 0.18     | *        |
| AP_bits          | CHEMBL2017974 | 0.533898            | 4600.00  | *        |
| TT_bits          | CHEMBL1092394 | 0.493671            | 0.89     | *        |
| FP2              | CHEMBL1258517 | 0.646707            | 0.42     | *        |
| hybridization    | CHEMBL1258517 | 0.736196            | 0.42     | *        |
| substructure     | CHEMBL1684984 | 0.857143            | 1600.00  | *        |
| graph            | CHEMBL1258517 | 0.789474            | 0.42     | *        |
| pubchem          | CHEMBL2017974 | 0.877907            | 4600.00  | *        |
| cdk_maccs        | CHEMBL586702  | 0.890909            | 350.00   | *        |
| klekota_roth     | CHEMBL1092394 | 0.690141            | 0.89     | *        |

\*\*\* ic50 ACTIVITY \*\*\* value prediction

based on 11 locally validated fgps ---> 1162.658

["TT\_bits", "substructure", "Pattern", "AP\_bits", "klekota\_roth",  
"pubchem", "graph", "FP2", "FeatMFP1", "cdk\_maccs", "hybridization"]

3 rank

PI3-kinase p110-beta subunit : Homo sapiens

score: 6.765 on ChEMBL3145 based on 9 fingerprints

| Fingerprint type | Ligand        | Tanimoto Similarity | activity | Valid fg |
|------------------|---------------|---------------------|----------|----------|
| FeatMFP1         | CHEMBL2017974 | 0.720000            | 166.0    | *        |
| MFP1             | CHEMBL2017974 | 0.472222            | 166.0    |          |
| RDKit7           | CHEMBL1258517 | 0.667313            | 24.0     |          |
| Pattern          | CHEMBL1258517 | 0.820896            | 24.0     |          |
| AP_bits          | CHEMBL2017974 | 0.533898            | 166.0    | *        |
| TT_bits          | CHEMBL1258517 | 0.329670            | 24.0     |          |
| FP2              | CHEMBL1258517 | 0.646707            | 24.0     | *        |
| hybridization    | CHEMBL1258517 | 0.736196            | 24.0     | *        |
| substructure     | CHEMBL1684984 | 0.857143            | 120.0    | *        |
| graph            | CHEMBL1258517 | 0.789474            | 24.0     | *        |
| pubchem          | CHEMBL2017974 | 0.877907            | 166.0    | *        |
| cdk_maccs        | CHEMBL1911005 | 0.927273            | 41.0     | *        |

```

klekota_roth CHEMBL1258517          0.676056      24.0      *
*** ic50 ACTIVITY *** value prediction
based on 9 locally validated fgps ---> 73.466
["substructure", "AP_bits", "FP2", "klekota_roth", "pubchem", "graph",
"FeatMFP1", "cdk_maccs", "hybridization"]

```

4 rank

PI3-kinase p110-gamma subunit : Homo sapiens

score: 6.738 on ChEMBL3267 based on 9 fingerprints

| Fingerprint type | Ligand        | Tanimoto Similarity | activity | Valid fg |
|------------------|---------------|---------------------|----------|----------|
| FeatMFP1         | CHEMBL2017974 | 0.720000            | 262.0    | *        |
| MFP1             | CHEMBL2017974 | 0.472222            | 262.0    |          |
| RDKit7           | CHEMBL1258517 | 0.667313            | 74.0     |          |
| Pattern          | CHEMBL1258744 | 0.825806            | 33.0     |          |
| AP_bits          | CHEMBL2017974 | 0.533898            | 262.0    | *        |
| TT_bits          | CHEMBL1258634 | 0.351648            | 99.0     |          |
| FP2              | CHEMBL1258517 | 0.646707            | 74.0     | *        |
| hybridization    | CHEMBL1258517 | 0.736196            | 74.0     | *        |
| substructure     | CHEMBL1684984 | 0.857143            | 36.0     | *        |
| graph            | CHEMBL1258517 | 0.789474            | 74.0     | *        |
| pubchem          | CHEMBL2017974 | 0.877907            | 262.0    | *        |
| cdk_maccs        | CHEMBL586702  | 0.890909            | 5.0      | *        |
| klekota_roth     | CHEMBL1258516 | 0.685714            | 150.0    | *        |

```

*** ic50 ACTIVITY *** value prediction
based on 9 locally validated fgps ---> 143.917
["substructure", "AP_bits", "FP2", "klekota_roth", "pubchem", "graph",
"FeatMFP1", "cdk_maccs", "hybridization"]

```

5 rank

PI3-kinase p110-delta subunit : Homo sapiens

score: 6.728 on ChEMBL3130 based on 9 fingerprints

| Fingerprint type | Ligand        | Tanimoto Similarity | activity | Valid fg |
|------------------|---------------|---------------------|----------|----------|
| FeatMFP1         | CHEMBL2017974 | 0.720000            | 116.0    | *        |
| MFP1             | CHEMBL2017974 | 0.472222            | 116.0    |          |
| RDKit7           | CHEMBL1258517 | 0.667313            | 77.0     |          |
| Pattern          | CHEMBL1258517 | 0.820896            | 77.0     |          |
| AP_bits          | CHEMBL2017974 | 0.533898            | 116.0    | *        |
| TT_bits          | CHEMBL1258517 | 0.329670            | 77.0     |          |
| FP2              | CHEMBL1258517 | 0.646707            | 77.0     | *        |
| hybridization    | CHEMBL1258517 | 0.736196            | 77.0     | *        |
| substructure     | CHEMBL1684984 | 0.857143            | 500.0    | *        |
| graph            | CHEMBL1258517 | 0.789474            | 77.0     | *        |
| pubchem          | CHEMBL2017974 | 0.877907            | 116.0    | *        |
| cdk_maccs        | CHEMBL586702  | 0.890909            | 3.0      | *        |
| klekota_roth     | CHEMBL1258517 | 0.676056            | 77.0     | *        |

```

*** ic50 ACTIVITY *** value prediction
based on 9 locally validated fgps ---> 105.529
["substructure", "AP_bits", "FP2", "klekota_roth", "pubchem", "graph",
"FeatMFP1", "cdk_maccs", "hybridization"]

```

# SwissTargetPrediction report:

## Reference:

Gfeller D., Michielin O. & Zoete V.  
 Shaping the interaction landscape of  
 bioactive molecules, *Bioinformatics*  
 (2013) 29:3073-3079.

## Query Molecule

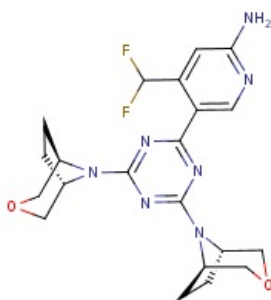

## Frequency of Target Class

| Target                                                                         | Uniprot ID | Gene code | ChEMBL ID  | Probability            | # sim. cmpds (3D / 2D) | Target Class   |
|--------------------------------------------------------------------------------|------------|-----------|------------|------------------------|------------------------|----------------|
| Phosphatidylinositol 4,5-bisphosphate 3-kinase catalytic subunit delta isoform | O00329     | PIK3CD    | CHEMBL3130 | <div><div></div></div> | 95 / 129               | Enzyme         |
| Phosphatidylinositol 4,5-bisphosphate 3-kinase catalytic subunit alpha isoform | P42336     | PIK3CA    | CHEMBL4005 | <div><div></div></div> | 95 / 129               | Enzyme         |
| Phosphatidylinositol 4,5-bisphosphate 3-kinase catalytic subunit beta isoform  | P42338     | PIK3CB    | CHEMBL3145 | <div><div></div></div> | 95 / 129               | Enzyme         |
| Serine/threonine-protein kinase mTOR                                           | P42345     | MTOR      | CHEMBL2842 | <div><div></div></div> | 28 / 111               | Enzyme         |
| Phosphatidylinositol 4,5-bisphosphate 3-kinase catalytic subunit gamma isoform | P48736     | PIK3CG    | CHEMBL3267 | <div><div></div></div> | 29 / 44                | Enzyme         |
| Cyclin-dependent kinase 1                                                      | P06493     | CDK1      | CHEMBL308  | <div><div></div></div> | 33 / 5                 | Ser_Thr Kinase |
| Cyclin-dependent kinase 4 ( <i>by homology</i> )                               | P11802     | CDK4      | CHEMBL331  | <div><div></div></div> | 33 / 5                 | Ser_Thr Kinase |
| Cyclin-dependent kinase 2                                                      | P24941     | CDK2      | CHEMBL301  | <div><div></div></div> | 33 / 5                 | Ser_Thr Kinase |
| Cyclin-dependent kinase 3 ( <i>by homology</i> )                               | Q00526     | CDK3      | CHEMBL4442 | <div><div></div></div> | 33 / 5                 | Ser_Thr Kinase |
| Cyclin-dependent kinase 6 ( <i>by homology</i> )                               | Q00534     | CDK6      | CHEMBL2508 | <div><div></div></div> | 33 / 5                 | Ser_Thr Kinase |
| Aurora kinase A                                                                | O14965     | AURKA     | CHEMBL4722 | <div><div></div></div> | 40 / 5                 | Ser_Thr Kinase |
| Aurora kinase B                                                                | Q96GD4     | AURKB     | CHEMBL2185 | <div><div></div></div> | 40 / 5                 | Ser_Thr Kinase |
| Aurora kinase C ( <i>by homology</i> )                                         | Q9UQB9     | AURKC     | CHEMBL3935 | <div><div></div></div> | 40 / 5                 | Ser_Thr Kinase |
| Vascular endothelial growth factor receptor 1 ( <i>by homology</i> )           | P17948     | FLT1      | CHEMBL1868 | <div><div></div></div> | 48 / 1                 | Tyr Kinase     |
| Vascular endothelial growth factor receptor 3 ( <i>by homology</i> )           | P35916     | FLT4      | CHEMBL1955 | <div><div></div></div> | 48 / 1                 | Tyr Kinase     |

# Polypharmacology Browser 2 Prediction:

Targets predicted using NN(ECfp4) + NB(ECfp4).

Save Table

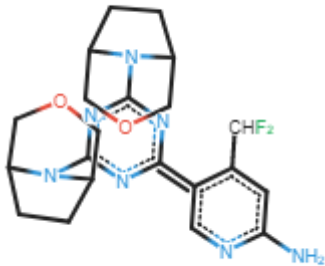

Query molecule

Target class overview

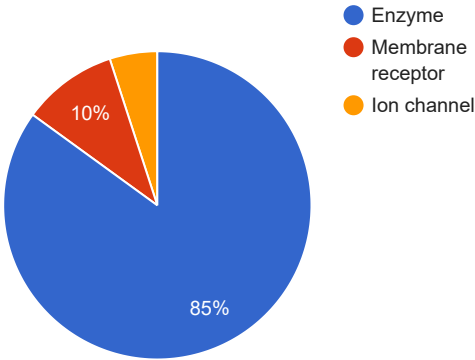

| Rank | ChEMBL ID                                                                                                                                  | Common name                              | Nearest neighbours |
|------|--------------------------------------------------------------------------------------------------------------------------------------------|------------------------------------------|--------------------|
| 1    | CHEMBL4005 ( <a href="https://www.ebi.ac.uk/chembl/target/inspect/CHEMBL4005">https://www.ebi.ac.uk/chembl/target/inspect/CHEMBL4005</a> ) | PI3-kinase p110-alpha subunit            | Show NN            |
| 2    | CHEMBL2842 ( <a href="https://www.ebi.ac.uk/chembl/target/inspect/CHEMBL2842">https://www.ebi.ac.uk/chembl/target/inspect/CHEMBL2842</a> ) | Serine/threonine-protein kinase mTOR     | Show NN            |
| 3    | CHEMBL3267 ( <a href="https://www.ebi.ac.uk/chembl/target/inspect/CHEMBL3267">https://www.ebi.ac.uk/chembl/target/inspect/CHEMBL3267</a> ) | PI3-kinase p110-gamma subunit            | Show NN            |
| 4    | CHEMBL3130 ( <a href="https://www.ebi.ac.uk/chembl/target/inspect/CHEMBL3130">https://www.ebi.ac.uk/chembl/target/inspect/CHEMBL3130</a> ) | PI3-kinase p110-delta subunit            | Show NN            |
| 5    | CHEMBL3145 ( <a href="https://www.ebi.ac.uk/chembl/target/inspect/CHEMBL3145">https://www.ebi.ac.uk/chembl/target/inspect/CHEMBL3145</a> ) | PI3-kinase p110-beta subunit             | Show NN            |
| 6    | CHEMBL2148 ( <a href="https://www.ebi.ac.uk/chembl/target/inspect/CHEMBL2148">https://www.ebi.ac.uk/chembl/target/inspect/CHEMBL2148</a> ) | Tyrosine-protein kinase JAK3             | Show NN            |
| 7    | CHEMBL1862 ( <a href="https://www.ebi.ac.uk/chembl/target/inspect/CHEMBL1862">https://www.ebi.ac.uk/chembl/target/inspect/CHEMBL1862</a> ) | Tyrosine-protein kinase ABL              | Show NN            |
| 8    | CHEMBL2971 ( <a href="https://www.ebi.ac.uk/chembl/target/inspect/CHEMBL2971">https://www.ebi.ac.uk/chembl/target/inspect/CHEMBL2971</a> ) | Tyrosine-protein kinase JAK2             | Show NN            |
| 9    | CHEMBL203 ( <a href="https://www.ebi.ac.uk/chembl/target/inspect/CHEMBL203">https://www.ebi.ac.uk/chembl/target/inspect/CHEMBL203</a> )    | Epidermal growth factor receptor erbB1   | Show NN            |
| 10   | CHEMBL240 ( <a href="https://www.ebi.ac.uk/chembl/target/inspect/CHEMBL240">https://www.ebi.ac.uk/chembl/target/inspect/CHEMBL240</a> )    | HERG                                     | Show NN            |
| 11   | CHEMBL1974 ( <a href="https://www.ebi.ac.uk/chembl/target/inspect/CHEMBL1974">https://www.ebi.ac.uk/chembl/target/inspect/CHEMBL1974</a> ) | Tyrosine-protein kinase receptor FLT3    | Show NN            |
| 12   | CHEMBL2276 ( <a href="https://www.ebi.ac.uk/chembl/target/inspect/CHEMBL2276">https://www.ebi.ac.uk/chembl/target/inspect/CHEMBL2276</a> ) | c-Jun N-terminal kinase 1                | Show NN            |
| 13   | CHEMBL253 ( <a href="https://www.ebi.ac.uk/chembl/target/inspect/CHEMBL253">https://www.ebi.ac.uk/chembl/target/inspect/CHEMBL253</a> )    | Cannabinoid CB2 receptor                 | Show NN            |
| 14   | CHEMBL4179 ( <a href="https://www.ebi.ac.uk/chembl/target/inspect/CHEMBL4179">https://www.ebi.ac.uk/chembl/target/inspect/CHEMBL4179</a> ) | c-Jun N-terminal kinase 2                | Show NN            |
| 15   | CHEMBL2185 ( <a href="https://www.ebi.ac.uk/chembl/target/inspect/CHEMBL2185">https://www.ebi.ac.uk/chembl/target/inspect/CHEMBL2185</a> ) | Serine/threonine-protein kinase Aurora-B | Show NN            |
| 16   | CHEMBL4282 ( <a href="https://www.ebi.ac.uk/chembl/target/inspect/CHEMBL4282">https://www.ebi.ac.uk/chembl/target/inspect/CHEMBL4282</a> ) | Serine/threonine-protein kinase AKT      | Show NN            |
| 17   | CHEMBL218 ( <a href="https://www.ebi.ac.uk/chembl/target/inspect/CHEMBL218">https://www.ebi.ac.uk/chembl/target/inspect/CHEMBL218</a> )    | Cannabinoid CB1 receptor                 | Show NN            |
| 18   | CHEMBL2147 ( <a href="https://www.ebi.ac.uk/chembl/target/inspect/CHEMBL2147">https://www.ebi.ac.uk/chembl/target/inspect/CHEMBL2147</a> ) | Serine/threonine-protein kinase PIM1     | Show NN            |

|    |                                                                                                                                                        |                                                       |                         |
|----|--------------------------------------------------------------------------------------------------------------------------------------------------------|-------------------------------------------------------|-------------------------|
| 19 | CHEMBL4040 ( <a href="https://www.ebi.ac.uk/chembl/target/inspect/CHEMBL4040">https://www.ebi.ac.uk/chembl/target/inspect/CHEMBL4040</a> )             | MAP kinase ERK2                                       | <a href="#">Show NN</a> |
| 20 | CHEMBL1075104<br>( <a href="https://www.ebi.ac.uk/chembl/target/inspect/CHEMBL1075104">https://www.ebi.ac.uk/chembl/target/inspect/CHEMBL1075104</a> ) | Leucine-rich repeat serine/threonine-protein kinase 2 | <a href="#">Show NN</a> |
