# Supplementary material for: Accelerating Drug Discovery by Early Protein Drug Target Prediction Based on a Multi-Fingerprint Similarity Search
Source: MDPI journal article supplement (doi:10.3390/molecules24122233), 2019-06-14
Supplement: s1 [file s1]

**MuSSel not predicted**

# SwissTargetPrediction report:

## Reference:

Gfeller D., Michielin O. & Zoete V.  
 Shaping the interaction landscape of  
 bioactive molecules, *Bioinformatics*  
 (2013) 29:3073-3079.

## Query Molecule

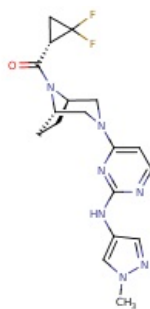

## Frequency of Target Class

| Target                                                               | Uniprot ID             | Gene code             | ChEMBL ID                  | Probability            | # sim. cmpds (3D / 2D) | Target Class   |
|----------------------------------------------------------------------|------------------------|-----------------------|----------------------------|------------------------|------------------------|----------------|
| Aurora kinase A                                                      | <a href="#">Q14965</a> | <a href="#">AURKA</a> | <a href="#">ChEMBL4722</a> | <div><div></div></div> | 103 / 36               | Ser_Thr Kinase |
| Aurora kinase B                                                      | <a href="#">Q96GD4</a> | <a href="#">AURKB</a> | <a href="#">ChEMBL2185</a> | <div><div></div></div> | 103 / 36               | Ser_Thr Kinase |
| Aurora kinase C ( <i>by homology</i> )                               | <a href="#">Q9UQB9</a> | <a href="#">AURKC</a> | <a href="#">ChEMBL3935</a> | <div><div></div></div> | 103 / 36               | Ser_Thr Kinase |
| Cyclin-dependent kinase 1 ( <i>by homology</i> )                     | <a href="#">P06493</a> | <a href="#">CDK1</a>  | <a href="#">ChEMBL308</a>  | <div><div></div></div> | 143 / 4                | Ser_Thr Kinase |
| Cyclin-dependent kinase 4                                            | <a href="#">P11802</a> | <a href="#">CDK4</a>  | <a href="#">ChEMBL331</a>  | <div><div></div></div> | 138 / 4                | Ser_Thr Kinase |
| Cyclin-dependent kinase 2                                            | <a href="#">P24941</a> | <a href="#">CDK2</a>  | <a href="#">ChEMBL301</a>  | <div><div></div></div> | 143 / 4                | Ser_Thr Kinase |
| Cyclin-dependent kinase 3 ( <i>by homology</i> )                     | <a href="#">Q00526</a> | <a href="#">CDK3</a>  | <a href="#">ChEMBL4442</a> | <div><div></div></div> | 143 / 4                | Ser_Thr Kinase |
| Cyclin-dependent kinase 6 ( <i>by homology</i> )                     | <a href="#">Q00534</a> | <a href="#">CDK6</a>  | <a href="#">ChEMBL2508</a> | <div><div></div></div> | 138 / 4                | Ser_Thr Kinase |
| Vascular endothelial growth factor receptor 1 ( <i>by homology</i> ) | <a href="#">P17948</a> | <a href="#">FLT1</a>  | <a href="#">ChEMBL1868</a> | <div><div></div></div> | 168 / 30               | Tyr Kinase     |
| Vascular endothelial growth factor receptor 3 ( <i>by homology</i> ) | <a href="#">P35916</a> | <a href="#">FLT4</a>  | <a href="#">ChEMBL1955</a> | <div><div></div></div> | 168 / 30               | Tyr Kinase     |
| Vascular endothelial growth factor receptor 2                        | <a href="#">P35968</a> | <a href="#">KDR</a>   | <a href="#">ChEMBL279</a>  | <div><div></div></div> | 168 / 30               | Tyr Kinase     |
| Inhibitor of nuclear factor kappa-B kinase subunit epsilon           | <a href="#">Q14164</a> | <a href="#">IKBKE</a> | <a href="#">ChEMBL3529</a> | <div><div></div></div> | 8 / 21                 | Ser_Thr Kinase |
| Serine/threonine-protein kinase TBK1                                 | <a href="#">Q9UHD2</a> | <a href="#">TBK1</a>  | <a href="#">ChEMBL5408</a> | <div><div></div></div> | 8 / 21                 | Ser_Thr Kinase |
| MAP/microtubule affinity-regulating kinase 3                         | <a href="#">P27448</a> | <a href="#">MARK3</a> | <a href="#">ChEMBL5600</a> | <div><div></div></div> | 4 / 1                  | Ser_Thr Kinase |
| Serine/threonine-protein kinase MARK2 ( <i>by homology</i> )         | <a href="#">Q7KZI7</a> | <a href="#">MARK2</a> | <a href="#">ChEMBL3831</a> | <div><div></div></div> | 4 / 1                  | Ser_Thr Kinase |

## Polypharmacology Browser 2 Prediction:

Targets predicted using NN(ECfp4) + NB(ECfp4).

[Save Table](#)

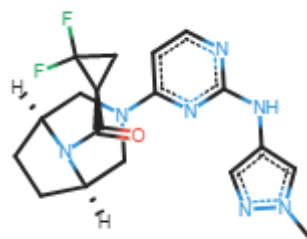

Query molecule

Target class overview

● Enzyme

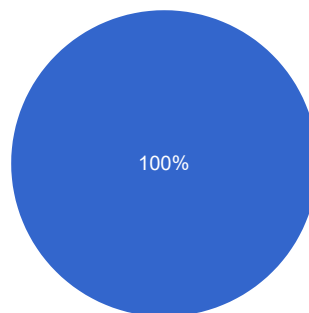

| Rank | ChEMBL ID                                                                                                                                  | Common name                                   | Nearest neighbours |
|------|--------------------------------------------------------------------------------------------------------------------------------------------|-----------------------------------------------|--------------------|
| 1    | CHEMBL279 ( <a href="https://www.ebi.ac.uk/chembl/target/inspect/CHEMBL279">https://www.ebi.ac.uk/chembl/target/inspect/CHEMBL279</a> )    | Vascular endothelial growth factor receptor 2 | Show NN            |
| 2    | CHEMBL1957 ( <a href="https://www.ebi.ac.uk/chembl/target/inspect/CHEMBL1957">https://www.ebi.ac.uk/chembl/target/inspect/CHEMBL1957</a> ) | Insulin-like growth factor I receptor         | Show NN            |
| 3    | CHEMBL4247 ( <a href="https://www.ebi.ac.uk/chembl/target/inspect/CHEMBL4247">https://www.ebi.ac.uk/chembl/target/inspect/CHEMBL4247</a> ) | ALK tyrosine kinase receptor                  | Show NN            |
| 4    | CHEMBL2185 ( <a href="https://www.ebi.ac.uk/chembl/target/inspect/CHEMBL2185">https://www.ebi.ac.uk/chembl/target/inspect/CHEMBL2185</a> ) | Serine/threonine-protein kinase Aurora-B      | Show NN            |
| 5    | CHEMBL2637 ( <a href="https://www.ebi.ac.uk/chembl/target/inspect/CHEMBL2637">https://www.ebi.ac.uk/chembl/target/inspect/CHEMBL2637</a> ) | c-Jun N-terminal kinase 3                     | Show NN            |
| 6    | CHEMBL262 ( <a href="https://www.ebi.ac.uk/chembl/target/inspect/CHEMBL262">https://www.ebi.ac.uk/chembl/target/inspect/CHEMBL262</a> )    | Glycogen synthase kinase-3 beta               | Show NN            |
| 7    | CHEMBL2147 ( <a href="https://www.ebi.ac.uk/chembl/target/inspect/CHEMBL2147">https://www.ebi.ac.uk/chembl/target/inspect/CHEMBL2147</a> ) | Serine/threonine-protein kinase PIM1          | Show NN            |
| 8    | CHEMBL301 ( <a href="https://www.ebi.ac.uk/chembl/target/inspect/CHEMBL301">https://www.ebi.ac.uk/chembl/target/inspect/CHEMBL301</a> )    | Cyclin-dependent kinase 2                     | Show NN            |
| 9    | CHEMBL2148 ( <a href="https://www.ebi.ac.uk/chembl/target/inspect/CHEMBL2148">https://www.ebi.ac.uk/chembl/target/inspect/CHEMBL2148</a> ) | Tyrosine-protein kinase JAK3                  | Show NN            |
| 10   | CHEMBL4005 ( <a href="https://www.ebi.ac.uk/chembl/target/inspect/CHEMBL4005">https://www.ebi.ac.uk/chembl/target/inspect/CHEMBL4005</a> ) | PI3-kinase p110-alpha subunit                 | Show NN            |
| 11   | CHEMBL2842 ( <a href="https://www.ebi.ac.uk/chembl/target/inspect/CHEMBL2842">https://www.ebi.ac.uk/chembl/target/inspect/CHEMBL2842</a> ) | Serine/threonine-protein kinase mTOR          | Show NN            |
| 12   | CHEMBL3778 ( <a href="https://www.ebi.ac.uk/chembl/target/inspect/CHEMBL3778">https://www.ebi.ac.uk/chembl/target/inspect/CHEMBL3778</a> ) | Interleukin-1 receptor-associated kinase 4    | Show NN            |
| 13   | CHEMBL2835 ( <a href="https://www.ebi.ac.uk/chembl/target/inspect/CHEMBL2835">https://www.ebi.ac.uk/chembl/target/inspect/CHEMBL2835</a> ) | Tyrosine-protein kinase JAK1                  | Show NN            |
| 14   | CHEMBL1862 ( <a href="https://www.ebi.ac.uk/chembl/target/inspect/CHEMBL1862">https://www.ebi.ac.uk/chembl/target/inspect/CHEMBL1862</a> ) | Tyrosine-protein kinase ABL                   | Show NN            |
| 15   | CHEMBL2971 ( <a href="https://www.ebi.ac.uk/chembl/target/inspect/CHEMBL2971">https://www.ebi.ac.uk/chembl/target/inspect/CHEMBL2971</a> ) | Tyrosine-protein kinase JAK2                  | Show NN            |
| 16   | CHEMBL3717 ( <a href="https://www.ebi.ac.uk/chembl/target/inspect/CHEMBL3717">https://www.ebi.ac.uk/chembl/target/inspect/CHEMBL3717</a> ) | Hepatocyte growth factor receptor             | Show NN            |
| 17   | CHEMBL4179 ( <a href="https://www.ebi.ac.uk/chembl/target/inspect/CHEMBL4179">https://www.ebi.ac.uk/chembl/target/inspect/CHEMBL4179</a> ) | c-Jun N-terminal kinase 2                     | Show NN            |
| 18   | CHEMBL1974 ( <a href="https://www.ebi.ac.uk/chembl/target/inspect/CHEMBL1974">https://www.ebi.ac.uk/chembl/target/inspect/CHEMBL1974</a> ) | Tyrosine-protein kinase receptor FLT3         | Show NN            |

|    |                                                                                                                                            |                                          |         |
|----|--------------------------------------------------------------------------------------------------------------------------------------------|------------------------------------------|---------|
| 19 | CHEMBL2276 ( <a href="https://www.ebi.ac.uk/chembl/target/inspect/CHEMBL2276">https://www.ebi.ac.uk/chembl/target/inspect/CHEMBL2276</a> ) | c-Jun N-terminal kinase 1                | Show NN |
| 20 | CHEMBL4722 ( <a href="https://www.ebi.ac.uk/chembl/target/inspect/CHEMBL4722">https://www.ebi.ac.uk/chembl/target/inspect/CHEMBL4722</a> ) | Serine/threonine-protein kinase Aurora-A | Show NN |
