# Supplementary material for: Accelerating Drug Discovery by Early Protein Drug Target Prediction Based on a Multi-Fingerprint Similarity Search
Source: MDPI journal article supplement (doi:10.3390/molecules24122233), 2019-06-14
Supplement: s1 [file s1]

## MuSSEL Prediction k<sub>i</sub>:

1 rank

Dopamine D1 receptor : Homo sapiens

score: 8.188 on ChEMBL2056 based on 10 fingerprints

| Fingerprint type | Ligand        | Tanimoto Similarity | activity | Valid fg |
|------------------|---------------|---------------------|----------|----------|
| FeatMFP1         | CHEMBL3671282 | 0.782609            | 7.98     | *        |
| MFP1             | CHEMBL3671282 | 0.741935            | 7.98     | *        |
| RDKit7           | CHEMBL3671282 | 0.803384            | 7.98     | *        |
| Pattern          | CHEMBL3671282 | 0.934236            | 7.98     | *        |
| AP_bits          | CHEMBL3671282 | 0.865613            | 7.98     | *        |
| TT_bits          | CHEMBL3671282 | 0.843750            | 7.98     | *        |
| FP2              | CHEMBL3671282 | 0.732558            | 7.98     | *        |
| hybridization    | CHEMBL3671282 | 0.797619            | 7.98     | *        |
| substructure     | CHEMBL3671273 | 0.857143            | 34.80    |          |
| graph            | CHEMBL3671282 | 0.800000            | 7.98     |          |
| pubchem          | CHEMBL3671282 | 0.817073            | 7.98     |          |
| cdk_maccs        | CHEMBL3671282 | 0.886364            | 7.98     | *        |
| klekota_roth     | CHEMBL3671282 | 0.800000            | 7.98     | *        |

\*\*\* ki ACTIVITY \*\*\* value prediction

based on 10 locally validated fgps ---> 32.870

["TT\_bits", "cdk\_maccs", "Pattern", "FP2", "MFP1", "klekota\_roth",  
"AP\_bits", "FeatMFP1", "RDKit7", "hybridization"]

# SwissTargetPrediction report:

## Reference:

Gfeller D., Michielin O. & Zoete V.  
Shaping the interaction landscape of  
bioactive molecules, *Bioinformatics*  
(2013) 29:3073-3079.

## Query Molecule

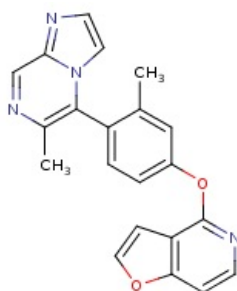

## Frequency of Target Class

| Target                                                          | Uniprot ID | Gene code | ChEMBL ID     | Probability            | # sim. cmpds (3D / 2D) | Target Class      |
|-----------------------------------------------------------------|------------|-----------|---------------|------------------------|------------------------|-------------------|
| Microtubule-associated protein tau                              | P10636     | MAPT      | CHEMBL1293224 | <div><div></div></div> | 386 / 13               | Unclassified      |
| Muscleblind-like protein 1                                      | Q9NR56     | MBNL1     | CHEMBL1293317 | <div><div></div></div> | 185 / 3                | Unclassified      |
| Muscleblind-like protein 2 (by homology)                        | Q5VZF2     | MBNL2     |               | <div><div></div></div> | 185 / 3                | Unclassified      |
| Muscleblind-like protein 3 (by homology)                        | Q9NUK0     | MBNL3     |               | <div><div></div></div> | 185 / 3                | Unclassified      |
| Adenosine receptor A2a                                          | P29274     | ADORA2A   | CHEMBL251     | <div><div></div></div> | 127 / 2                | Membrane receptor |
| Adenosine receptor A1 (by homology)                             | P30542     | ADORA1    | CHEMBL226     | <div><div></div></div> | 127 / 2                | Membrane receptor |
| cAMP and cAMP-inhibited cGMP 3',5'-cyclic phosphodiesterase 10A | Q9Y233     | PDE10A    | CHEMBL4409    | <div><div></div></div> | 27 / 12                | Enzyme            |
| cGMP-specific 3',5'-cyclic phosphodiesterase                    | O76074     | PDE5A     | CHEMBL1827    | <div><div></div></div> | 13 / 4                 | Enzyme            |
| Dual 3',5'-cyclic-AMP and -GMP phosphodiesterase 11A            | Q9HCR9     | PDE11A    | CHEMBL2717    | <div><div></div></div> | 10 / 4                 | Enzyme            |
| Vascular endothelial growth factor receptor 1 (by homology)     | P17948     | FLT1      | CHEMBL1868    | <div><div></div></div> | 107 / 4                | Tyr Kinase        |
| Vascular endothelial growth factor receptor 3 (by homology)     | P35916     | FLT4      | CHEMBL1955    | <div><div></div></div> | 107 / 4                | Tyr Kinase        |
| Vascular endothelial growth factor receptor 2                   | P35968     | KDR       | CHEMBL279     | <div><div></div></div> | 107 / 4                | Tyr Kinase        |
| Glycogen synthase kinase-3 alpha (by homology)                  | P49840     | GSK3A     | CHEMBL2850    | <div><div></div></div> | 53 / 4                 | Ser_Thr Kinase    |
| Glycogen synthase kinase-3 beta                                 | P49841     | GSK3B     | CHEMBL262     | <div><div></div></div> | 53 / 4                 | Ser_Thr Kinase    |
| Histamine H3 receptor                                           | Q9Y5N1     | HRH3      | CHEMBL264     | <div><div></div></div> | 3 / 22                 | Membrane receptor |

# Polypharmacology Browser 2 Prediction:

Targets predicted using NN(ECfp4) + NB(ECfp4).

Save Table

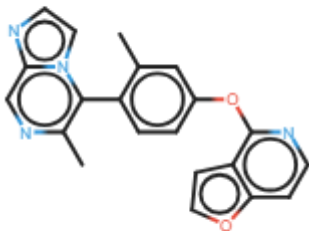

Query molecule

Target class overview

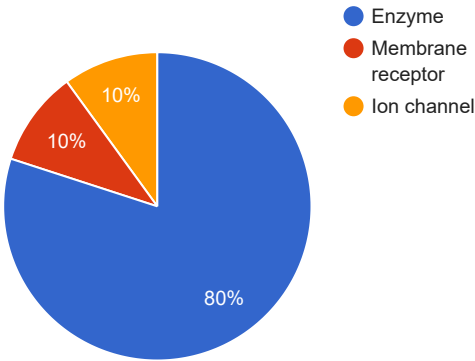

| Rank | ChEMBL ID                                                                                                                                     | Common name                                                     | Nearest neighbours |
|------|-----------------------------------------------------------------------------------------------------------------------------------------------|-----------------------------------------------------------------|--------------------|
| 1    | CHEMBL2056<br>( <a href="https://www.ebi.ac.uk/chembl/target/inspect/CHEMBL2056">https://www.ebi.ac.uk/chembl/target/inspect/CHEMBL2056</a> ) | Dopamine D1 receptor                                            | Show NN            |
| 2    | CHEMBL279<br>( <a href="https://www.ebi.ac.uk/chembl/target/inspect/CHEMBL279">https://www.ebi.ac.uk/chembl/target/inspect/CHEMBL279</a> )    | Vascular endothelial growth factor receptor 2                   | Show NN            |
| 3    | CHEMBL262<br>( <a href="https://www.ebi.ac.uk/chembl/target/inspect/CHEMBL262">https://www.ebi.ac.uk/chembl/target/inspect/CHEMBL262</a> )    | Glycogen synthase kinase-3 beta                                 | Show NN            |
| 4    | CHEMBL4409<br>( <a href="https://www.ebi.ac.uk/chembl/target/inspect/CHEMBL4409">https://www.ebi.ac.uk/chembl/target/inspect/CHEMBL4409</a> ) | Phosphodiesterase 10A                                           | Show NN            |
| 5    | CHEMBL340<br>( <a href="https://www.ebi.ac.uk/chembl/target/inspect/CHEMBL340">https://www.ebi.ac.uk/chembl/target/inspect/CHEMBL340</a> )    | Cytochrome P450 3A4                                             | Show NN            |
| 6    | CHEMBL6140<br>( <a href="https://www.ebi.ac.uk/chembl/target/inspect/CHEMBL6140">https://www.ebi.ac.uk/chembl/target/inspect/CHEMBL6140</a> ) | cAMP and cAMP-inhibited cGMP 3',5'-cyclic phosphodiesterase 10A | Show NN            |
| 7    | CHEMBL1974<br>( <a href="https://www.ebi.ac.uk/chembl/target/inspect/CHEMBL1974">https://www.ebi.ac.uk/chembl/target/inspect/CHEMBL1974</a> ) | Tyrosine-protein kinase receptor FLT3                           | Show NN            |
| 8    | CHEMBL260<br>( <a href="https://www.ebi.ac.uk/chembl/target/inspect/CHEMBL260">https://www.ebi.ac.uk/chembl/target/inspect/CHEMBL260</a> )    | MAP kinase p38 alpha                                            | Show NN            |
| 9    | CHEMBL1957<br>( <a href="https://www.ebi.ac.uk/chembl/target/inspect/CHEMBL1957">https://www.ebi.ac.uk/chembl/target/inspect/CHEMBL1957</a> ) | Insulin-like growth factor I receptor                           | Show NN            |
| 10   | CHEMBL4296<br>( <a href="https://www.ebi.ac.uk/chembl/target/inspect/CHEMBL4296">https://www.ebi.ac.uk/chembl/target/inspect/CHEMBL4296</a> ) | Sodium channel protein type IX alpha subunit                    | Show NN            |
| 11   | CHEMBL2185<br>( <a href="https://www.ebi.ac.uk/chembl/target/inspect/CHEMBL2185">https://www.ebi.ac.uk/chembl/target/inspect/CHEMBL2185</a> ) | Serine/threonine-protein kinase Aurora-B                        | Show NN            |
| 12   | CHEMBL1955<br>( <a href="https://www.ebi.ac.uk/chembl/target/inspect/CHEMBL1955">https://www.ebi.ac.uk/chembl/target/inspect/CHEMBL1955</a> ) | Vascular endothelial growth factor receptor 3                   | Show NN            |
| 13   | CHEMBL240<br>( <a href="https://www.ebi.ac.uk/chembl/target/inspect/CHEMBL240">https://www.ebi.ac.uk/chembl/target/inspect/CHEMBL240</a> )    | HERG                                                            | Show NN            |

|    |                                                                                                                                               |                                          |         |
|----|-----------------------------------------------------------------------------------------------------------------------------------------------|------------------------------------------|---------|
| 14 | CHEMBL4005<br>( <a href="https://www.ebi.ac.uk/chembl/target/inspect/CHEMBL4005">https://www.ebi.ac.uk/chembl/target/inspect/CHEMBL4005</a> ) | PI3-kinase p110-alpha subunit            | Show NN |
| 15 | CHEMBL258<br>( <a href="https://www.ebi.ac.uk/chembl/target/inspect/CHEMBL258">https://www.ebi.ac.uk/chembl/target/inspect/CHEMBL258</a> )    | Tyrosine-protein kinase LCK              | Show NN |
| 16 | CHEMBL2276<br>( <a href="https://www.ebi.ac.uk/chembl/target/inspect/CHEMBL2276">https://www.ebi.ac.uk/chembl/target/inspect/CHEMBL2276</a> ) | c-Jun N-terminal kinase 1                | Show NN |
| 17 | CHEMBL4722<br>( <a href="https://www.ebi.ac.uk/chembl/target/inspect/CHEMBL4722">https://www.ebi.ac.uk/chembl/target/inspect/CHEMBL4722</a> ) | Serine/threonine-protein kinase Aurora-A | Show NN |
| 18 | CHEMBL1951<br>( <a href="https://www.ebi.ac.uk/chembl/target/inspect/CHEMBL1951">https://www.ebi.ac.uk/chembl/target/inspect/CHEMBL1951</a> ) | Monoamine oxidase A                      | Show NN |
| 19 | CHEMBL4439<br>( <a href="https://www.ebi.ac.uk/chembl/target/inspect/CHEMBL4439">https://www.ebi.ac.uk/chembl/target/inspect/CHEMBL4439</a> ) | TGF-beta receptor type I                 | Show NN |
| 20 | CHEMBL226<br>( <a href="https://www.ebi.ac.uk/chembl/target/inspect/CHEMBL226">https://www.ebi.ac.uk/chembl/target/inspect/CHEMBL226</a> )    | Adenosine A1 receptor                    | Show NN |
