# Supplementary material for: Accelerating Drug Discovery by Early Protein Drug Target Prediction Based on a Multi-Fingerprint Similarity Search
Source: MDPI journal article supplement (doi:10.3390/molecules24122233), 2019-06-14
Supplement: s1 [file s1]

## MuSSEL Prediction IC<sub>50</sub>:

1 rank

Neuraminidase : Influenza A virus

score: 11.797 on ChEMBL1667684 based on 13 fingerprints

| Fingerprint type | Ligand        | Tanimoto | Similarity | activity | Valid fg |
|------------------|---------------|----------|------------|----------|----------|
| FeatMFP1         | ChEMBL3342471 |          | 0.923077   | 7.1      | *        |
| MFP1             | ChEMBL3342471 |          | 0.918919   | 7.1      | *        |
| RDKit7           | ChEMBL3342471 |          | 0.929990   | 7.1      | *        |
| Pattern          | ChEMBL3342478 |          | 0.965753   | 1.9      | *        |
| AP_bits          | ChEMBL3342478 |          | 0.792363   | 1.9      | *        |
| TT_bits          | ChEMBL3342471 |          | 0.830189   | 7.1      | *        |
| FP2              | ChEMBL3342471 |          | 0.891892   | 7.1      | *        |
| hybridization    | ChEMBL3342485 |          | 0.966469   | 2.1      | *        |
| substructure     | ChEMBL3342471 |          | 0.920000   | 7.1      | *        |
| graph            | ChEMBL3342485 |          | 0.921053   | 2.1      | *        |
| pubchem          | ChEMBL3342485 |          | 0.892405   | 2.1      | *        |
| cdk_maccs        | ChEMBL3342478 |          | 0.913793   | 1.9      | *        |
| klekota_roth     | ChEMBL3342478 |          | 0.930693   | 1.9      | *        |

\*\*\* ic50 ACTIVITY \*\*\* value prediction

based on 13 locally validated fgps ---> 7.924

["TT\_bits", "substructure", "cdk\_maccs", "Pattern", "FP2", "MFP1", "klekota\_roth", "pubchem", "graph", "AP\_bits", "FeatMFP1", "RDKit7", "hybridization"]

2 rank

Neuraminidase : Influenza A virus (strain A/USSR/90/1977 H1N1)

score: 11.797 on ChEMBL3559643 based on 13 fingerprints

| Fingerprint type | Ligand        | Tanimoto | Similarity | activity | Valid fg |
|------------------|---------------|----------|------------|----------|----------|
| FeatMFP1         | ChEMBL3342471 |          | 0.923077   | 19.0     | *        |
| MFP1             | ChEMBL3342471 |          | 0.918919   | 19.0     | *        |
| RDKit7           | ChEMBL3342471 |          | 0.929990   | 19.0     | *        |
| Pattern          | ChEMBL3342478 |          | 0.965753   | 3.8      | *        |
| AP_bits          | ChEMBL3342478 |          | 0.792363   | 3.8      | *        |
| TT_bits          | ChEMBL3342471 |          | 0.830189   | 19.0     | *        |
| FP2              | ChEMBL3342471 |          | 0.891892   | 19.0     | *        |
| hybridization    | ChEMBL3342485 |          | 0.966469   | 4.3      | *        |
| substructure     | ChEMBL3342471 |          | 0.920000   | 19.0     | *        |
| graph            | ChEMBL3342485 |          | 0.921053   | 4.3      | *        |
| pubchem          | ChEMBL3342485 |          | 0.892405   | 4.3      | *        |
| cdk_maccs        | ChEMBL3342478 |          | 0.913793   | 3.8      | *        |
| klekota_roth     | ChEMBL3342478 |          | 0.930693   | 3.8      | *        |

\*\*\* ic50 ACTIVITY \*\*\* value prediction

based on 13 locally validated fgps ---> 18.838

["TT\_bits", "substructure", "cdk\_maccs", "Pattern", "FP2", "MFP1", "klekota\_roth", "pubchem", "graph", "AP\_bits", "FeatMFP1", "RDKit7", "hybridization"]

3 rank

Neuraminidase : Influenza A virus (A/Puerto Rico/8/1934(H1N1))

score: 7.557 on ChEMBL2051 based on 10 fingerprints

| Fingerprint type | Ligand       | Tanimoto | Similarity | activity | Valid fg |
|------------------|--------------|----------|------------|----------|----------|
| FeatMFP1         | ChEMBL310217 |          | 0.814815   | 620.0    | *        |
| MFP1             | ChEMBL79499  |          | 0.714286   | 12.0     | *        |
| RDKit7           | ChEMBL674    |          | 0.774295   | 1.0      | *        |
| Pattern          | ChEMBL81083  |          | 0.912644   | 90.0     | *        |
| AP_bits          | ChEMBL81083  |          | 0.545652   | 90.0     | *        |
| TT_bits          | ChEMBL79499  |          | 0.573770   | 12.0     | *        |
| FP2              | ChEMBL79499  |          | 0.725000   | 12.0     | *        |
| hybridization    | ChEMBL81717  |          | 0.760748   | 0.5      | *        |
| substructure     | ChEMBL310217 |          | 0.846154   | 620.0    |          |
| graph            | ChEMBL53768  |          | 0.672043   | 1500.0   |          |

|              |             |          |        |   |
|--------------|-------------|----------|--------|---|
| pubchem      | CHEMBL81083 | 0.846667 | 90.0   | * |
| cdk_maccs    | CHEMBL53336 | 0.771930 | 2300.0 |   |
| klekota_roth | CHEMBL674   | 0.888889 | 1.0    | * |

\*\*\* ic50 ACTIVITY \*\*\* value prediction  
 based on 10 locally validated fgps ---> 21.359  
 ["TT\_bits", "Pattern", "FP2", "MFP1", "klekota\_roth", "pubchem",  
 "AP\_bits", "FeatMFP1", "RDKit7", "hybridization"]

4 rank

Neuraminidase : Influenza B virus (strain B/Lee/1940)

score: 6.560 on ChEMBL3377 based on 9 fingerprints

| Fingerprint type | Ligand       | Tanimoto | Similarity | activity | Valid fg |
|------------------|--------------|----------|------------|----------|----------|
| FeatMFP1         | CHEMBL79499  |          | 0.814815   | 35.0     | *        |
| MFP1             | CHEMBL79499  |          | 0.714286   | 35.0     | *        |
| RDKit7           | CHEMBL674    |          | 0.774295   | 3.0      | *        |
| Pattern          | CHEMBL98906  |          | 0.822811   | 1.6      |          |
| AP_bits          | CHEMBL352318 |          | 0.532946   | 0.3      | *        |
| TT_bits          | CHEMBL79499  |          | 0.573770   | 35.0     | *        |
| FP2              | CHEMBL79499  |          | 0.725000   | 35.0     | *        |
| hybridization    | CHEMBL674    |          | 0.698189   | 3.0      | *        |
| substructure     | CHEMBL79499  |          | 0.846154   | 35.0     |          |
| graph            | CHEMBL311273 |          | 0.656085   | 36000.0  |          |
| pubchem          | CHEMBL79499  |          | 0.837838   | 35.0     | *        |
| cdk_maccs        | CHEMBL674    |          | 0.771930   | 3.0      |          |
| klekota_roth     | CHEMBL674    |          | 0.888889   | 3.0      | *        |

\*\*\* ic50 ACTIVITY \*\*\* value prediction  
 based on 9 locally validated fgps ---> 40.557  
 ["TT\_bits", "AP\_bits", "MFP1", "klekota\_roth", "pubchem", "FP2",  
 "FeatMFP1", "RDKit7", "hybridization"]

5 rank

Neuraminidase : Influenza A virus (strain A/Wilson-Smith/1933 H1N1)

(Influenza A virus(strain A/WS/1933 H1N1))

score: 5.582 on ChEMBL1287610 based on 8 fingerprints

| Fingerprint type | Ligand        | Tanimoto | Similarity | activity | Valid fg |
|------------------|---------------|----------|------------|----------|----------|
| FeatMFP1         | CHEMBL674     |          | 0.730769   | 2.6      | *        |
| MFP1             | CHEMBL674     |          | 0.675000   | 2.6      | *        |
| RDKit7           | CHEMBL674     |          | 0.774295   | 2.6      | *        |
| Pattern          | CHEMBL3357205 |          | 0.817181   | 6946.0   |          |
| AP_bits          | CHEMBL3263942 |          | 0.498099   | 24.6     | *        |
| TT_bits          | CHEMBL3357205 |          | 0.593750   | 6946.0   | *        |
| FP2              | CHEMBL674     |          | 0.722973   | 2.6      | *        |
| hybridization    | CHEMBL674     |          | 0.698189   | 2.6      | *        |
| substructure     | CHEMBL674     |          | 0.807692   | 2.6      |          |
| graph            | CHEMBL674     |          | 0.650273   | 2.6      |          |
| pubchem          | CHEMBL3357202 |          | 0.776316   | 1010.0   |          |
| cdk_maccs        | CHEMBL674     |          | 0.771930   | 2.6      |          |
| klekota_roth     | CHEMBL674     |          | 0.888889   | 2.6      | *        |

\*\*\* ic50 ACTIVITY \*\*\* value prediction  
 based on 8 locally validated fgps ---> 1425.604  
 ["TT\_bits", "AP\_bits", "MFP1", "klekota\_roth", "FP2", "FeatMFP1",  
 "RDKit7", "hybridization"]

6 rank

Neuraminidase : Influenza A virus

score: 5.505 on ChEMBL6135 based on 8 fingerprints

| Fingerprint type | Ligand    | Tanimoto | Similarity | activity | Valid fg |
|------------------|-----------|----------|------------|----------|----------|
| FeatMFP1         | CHEMBL674 |          | 0.730769   | 0.4      | *        |
| MFP1             | CHEMBL674 |          | 0.675000   | 0.4      | *        |
| RDKit7           | CHEMBL674 |          | 0.774295   | 0.4      | *        |

|               |               |          |     |   |
|---------------|---------------|----------|-----|---|
| Pattern       | CHEMBL3263942 | 0.772277 | 3.2 |   |
| AP_bits       | CHEMBL3263939 | 0.515267 | 1.7 | * |
| TT_bits       | CHEMBL674     | 0.500000 | 0.4 | * |
| FP2           | CHEMBL674     | 0.722973 | 0.4 | * |
| hybridization | CHEMBL674     | 0.698189 | 0.4 | * |
| substructure  | CHEMBL674     | 0.807692 | 0.4 |   |
| graph         | CHEMBL674     | 0.650273 | 0.4 |   |
| pubchem       | CHEMBL3263938 | 0.673203 | 1.8 |   |
| cdk_maccs     | CHEMBL674     | 0.771930 | 0.4 |   |
| klekota_roth  | CHEMBL674     | 0.888889 | 0.4 | * |

\*\*\* ic50 ACTIVITY \*\*\* value prediction  
based on 8 locally validated fgps ---> 0.649  
["TT\_bits", "AP\_bits", "MFP1", "klekota\_roth", "FP2", "FeatMFP1",  
"RDKit7", "hybridization"]

# SwissTargetPrediction report:

## Reference:

Gfeller D., Michielin O. & Zoete V.  
Shaping the interaction landscape of  
bioactive molecules, *Bioinformatics*  
(2013) 29:3073-3079.

## Query Molecule

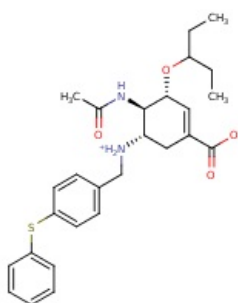

## Frequency of Target Class

| Target                                              | Uniprot ID | Gene code | ChEMBL ID     | Probability            | # sim. cmpds (3D / 2D) | Target Class      |
|-----------------------------------------------------|------------|-----------|---------------|------------------------|------------------------|-------------------|
| 5-hydroxytryptamine receptor 2A                     | P28223     | HTR2A     | CHEMBL224     | <div><div></div></div> | 16 / 13                | Membrane receptor |
| 5-hydroxytryptamine receptor 2C<br>(by homology)    | P28335     | HTR2C     | CHEMBL225     | <div><div></div></div> | 4 / 13                 | Membrane receptor |
| 5-hydroxytryptamine receptor 2B<br>(by homology)    | P41595     | HTR2B     | CHEMBL1833    | <div><div></div></div> | 4 / 13                 | Membrane receptor |
| Activation peptide fragment 1                       | P00734     | F2        | CHEMBL204     | <div><div></div></div> | 49 / 4                 | Serine Protease   |
| Muscleblind-like protein 1                          | Q9NR56     | MBNL1     | CHEMBL1293317 | <div><div></div></div> | 24 / 6                 | Unclassified      |
| Muscleblind-like protein 2 (by homology)            | Q5VZF2     | MBNL2     |               | <div><div></div></div> | 24 / 6                 | Unclassified      |
| Muscleblind-like protein 3 (by homology)            | Q9NUK0     | MBNL3     |               | <div><div></div></div> | 24 / 6                 | Unclassified      |
| Factor X light chain                                | P00742     | F10       | CHEMBL244     | <div><div></div></div> | 45 / 3                 | Serine Protease   |
| Coagulation factor VII                              | P08709     | F7        | CHEMBL3991    | <div><div></div></div> | 45 / 3                 | Serine Protease   |
| Coagulation factor IXa heavy chain<br>(by homology) | P00740     | F9        | CHEMBL2016    | <div><div></div></div> | 45 / 3                 | Serine Protease   |
| Microtubule-associated protein tau                  | P10636     | MAPT      | CHEMBL1293224 | <div><div></div></div> | 52 / 9                 | Unclassified      |
| Thromboxane A2 receptor                             | P21731     | TBXA2R    | CHEMBL2069    | <div><div></div></div> | 139 / 6                | Membrane receptor |
| Alpha-trypsin chain 1                               | P07477     | PRSS1     | CHEMBL209     | <div><div></div></div> | 10 / 2                 | Serine Protease   |
| Trypsin-2 (by homology)                             | P07478     | PRSS2     | CHEMBL3159    | <div><div></div></div> | 10 / 2                 | Serine Protease   |
| Trypsin-3 (by homology)                             | P35030     | PRSS3     | CHEMBL4551    | <div><div></div></div> | 10 / 2                 | Serine Protease   |

## Polypharmacology Browser 2 Prediction:

Targets predicted using NN(ECfp4) + NB(ECfp4).

[Save Table](#)

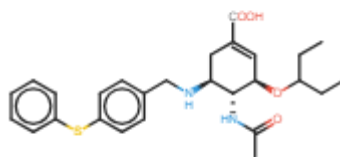

Query molecule

Target class overview

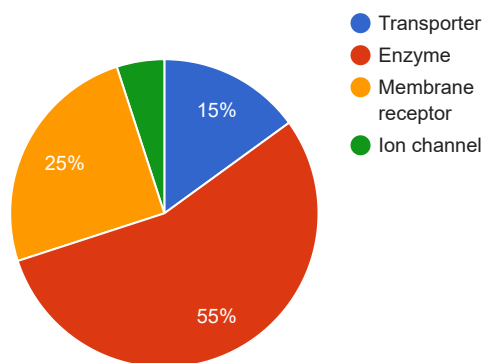

| Rank | ChEMBL ID                                                                                                                                  | Common name                   | Nearest neighbours |
|------|--------------------------------------------------------------------------------------------------------------------------------------------|-------------------------------|--------------------|
| 1    | CHEMBL332 ( <a href="https://www.ebi.ac.uk/chembl/target/inspect/CHEMBL332">https://www.ebi.ac.uk/chembl/target/inspect/CHEMBL332</a> )    | Matrix metalloproteinase-1    | Show NN            |
| 2    | CHEMBL333 ( <a href="https://www.ebi.ac.uk/chembl/target/inspect/CHEMBL333">https://www.ebi.ac.uk/chembl/target/inspect/CHEMBL333</a> )    | Matrix metalloproteinase-2    | Show NN            |
| 3    | CHEMBL338 ( <a href="https://www.ebi.ac.uk/chembl/target/inspect/CHEMBL338">https://www.ebi.ac.uk/chembl/target/inspect/CHEMBL338</a> )    | Dopamine transporter          | Show NN            |
| 4    | CHEMBL313 ( <a href="https://www.ebi.ac.uk/chembl/target/inspect/CHEMBL313">https://www.ebi.ac.uk/chembl/target/inspect/CHEMBL313</a> )    | Serotonin transporter         | Show NN            |
| 5    | CHEMBL280 ( <a href="https://www.ebi.ac.uk/chembl/target/inspect/CHEMBL280">https://www.ebi.ac.uk/chembl/target/inspect/CHEMBL280</a> )    | Matrix metalloproteinase 13   | Show NN            |
| 6    | CHEMBL4822 ( <a href="https://www.ebi.ac.uk/chembl/target/inspect/CHEMBL4822">https://www.ebi.ac.uk/chembl/target/inspect/CHEMBL4822</a> ) | Beta-secretase 1              | Show NN            |
| 7    | CHEMBL2625 ( <a href="https://www.ebi.ac.uk/chembl/target/inspect/CHEMBL2625">https://www.ebi.ac.uk/chembl/target/inspect/CHEMBL2625</a> ) | Angiotensin-converting enzyme | Show NN            |
| 8    | CHEMBL283 ( <a href="https://www.ebi.ac.uk/chembl/target/inspect/CHEMBL283">https://www.ebi.ac.uk/chembl/target/inspect/CHEMBL283</a> )    | Matrix metalloproteinase 3    | Show NN            |
| 9    | CHEMBL321 ( <a href="https://www.ebi.ac.uk/chembl/target/inspect/CHEMBL321">https://www.ebi.ac.uk/chembl/target/inspect/CHEMBL321</a> )    | Matrix metalloproteinase 9    | Show NN            |
| 10   | CHEMBL304 ( <a href="https://www.ebi.ac.uk/chembl/target/inspect/CHEMBL304">https://www.ebi.ac.uk/chembl/target/inspect/CHEMBL304</a> )    | Norepinephrine transporter    | Show NN            |
| 11   | CHEMBL233 ( <a href="https://www.ebi.ac.uk/chembl/target/inspect/CHEMBL233">https://www.ebi.ac.uk/chembl/target/inspect/CHEMBL233</a> )    | Mu opioid receptor            | Show NN            |
| 12   | CHEMBL236 ( <a href="https://www.ebi.ac.uk/chembl/target/inspect/CHEMBL236">https://www.ebi.ac.uk/chembl/target/inspect/CHEMBL236</a> )    | Delta opioid receptor         | Show NN            |
| 13   | CHEMBL1944 ( <a href="https://www.ebi.ac.uk/chembl/target/inspect/CHEMBL1944">https://www.ebi.ac.uk/chembl/target/inspect/CHEMBL1944</a> ) | Neprilysin                    | Show NN            |
| 14   | CHEMBL240 ( <a href="https://www.ebi.ac.uk/chembl/target/inspect/CHEMBL240">https://www.ebi.ac.uk/chembl/target/inspect/CHEMBL240</a> )    | HERG                          | Show NN            |
| 15   | CHEMBL2581 ( <a href="https://www.ebi.ac.uk/chembl/target/inspect/CHEMBL2581">https://www.ebi.ac.uk/chembl/target/inspect/CHEMBL2581</a> ) | Cathepsin D                   | Show NN            |
| 16   | CHEMBL3369 ( <a href="https://www.ebi.ac.uk/chembl/target/inspect/CHEMBL3369">https://www.ebi.ac.uk/chembl/target/inspect/CHEMBL3369</a> ) | Neprilysin                    | Show NN            |
| 17   | CHEMBL1945 ( <a href="https://www.ebi.ac.uk/chembl/target/inspect/CHEMBL1945">https://www.ebi.ac.uk/chembl/target/inspect/CHEMBL1945</a> ) | Melatonin receptor 1A         | Show NN            |
| 18   | CHEMBL217 ( <a href="https://www.ebi.ac.uk/chembl/target/inspect/CHEMBL217">https://www.ebi.ac.uk/chembl/target/inspect/CHEMBL217</a> )    | Dopamine D2 receptor          | Show NN            |

|    |                                                                                                                                            |                            |         |
|----|--------------------------------------------------------------------------------------------------------------------------------------------|----------------------------|---------|
| 19 | CHEMBL4588 ( <a href="https://www.ebi.ac.uk/chembl/target/inspect/CHEMBL4588">https://www.ebi.ac.uk/chembl/target/inspect/CHEMBL4588</a> ) | Matrix metalloproteinase 8 | Show NN |
| 20 | CHEMBL249 ( <a href="https://www.ebi.ac.uk/chembl/target/inspect/CHEMBL249">https://www.ebi.ac.uk/chembl/target/inspect/CHEMBL249</a> )    | Neurokinin 1 receptor      | Show NN |
