# Supplementary material for: Accelerating Drug Discovery by Early Protein Drug Target Prediction Based on a Multi-Fingerprint Similarity Search
Source: MDPI journal article supplement (doi:10.3390/molecules24122233), 2019-06-14
Supplement: s1 [file s1]

## MuSSEL Prediction IC<sub>50</sub>:

1 rank

Vascular endothelial growth factor receptor 2 : Homo sapiens

score: 6.544 on ChEMBL279 based on 9 fingerprints

| Fingerprint type | Ligand        | Tanimoto | Similarity | activity | Valid fg |
|------------------|---------------|----------|------------|----------|----------|
| FeatMFP1         | CHEMBL3754556 |          | 0.680000   | 86.67    | *        |
| MFP1             | CHEMBL3746595 |          | 0.560976   | 4.00     | *        |
| RDKit7           | CHEMBL612137  |          | 0.516364   | 40.00    |          |
| Pattern          | CHEMBL470483  |          | 0.881696   | 470.00   | *        |
| AP_bits          | CHEMBL1242977 |          | 0.576497   | 3270.00  | *        |
| TT_bits          | CHEMBL272670  |          | 0.454545   | 19.95    |          |
| FP2              | CHEMBL272670  |          | 0.633987   | 19.95    | *        |
| hybridization    | CHEMBL182283  |          | 0.658046   | 630.00   | *        |
| substructure     | CHEMBL577742  |          | 0.842105   | 13.00    |          |
| graph            | CHEMBL183504  |          | 0.841808   | 2040.00  | *        |
| pubchem          | CHEMBL3814321 |          | 0.871287   | 120.00   | *        |
| cdk_maccs        | CHEMBL600398  |          | 0.839286   | 860.00   | *        |
| klekota_roth     | CHEMBL243916  |          | 0.555556   | 2.60     |          |

\*\*\* ic50 ACTIVITY \*\*\* value prediction

based on 8 locally validated fgps ---> 645.383

["Pattern", "AP\_bits", "MFP1", "pubchem", "graph", "FP2", "cdk\_maccs", "hybridization"]

2 rank

MAP kinase signal-integrating kinase 2 : Homo sapiens

score: 5.958 on ChEMBL4204 based on 8 fingerprints

| Fingerprint type | Ligand        | Tanimoto | Similarity | activity | Valid fg |
|------------------|---------------|----------|------------|----------|----------|
| FeatMFP1         | CHEMBL3805074 |          | 0.636364   | 22.0     |          |
| MFP1             | CHEMBL3805074 |          | 0.636364   | 22.0     | *        |
| RDKit7           | CHEMBL3805094 |          | 0.706952   | 760.0    | *        |
| Pattern          | CHEMBL3805094 |          | 0.855422   | 760.0    | *        |
| AP_bits          | CHEMBL3805094 |          | 0.444444   | 760.0    |          |
| TT_bits          | CHEMBL3805094 |          | 0.597015   | 760.0    | *        |
| FP2              | CHEMBL3805094 |          | 0.774194   | 760.0    | *        |
| hybridization    | CHEMBL3805094 |          | 0.630653   | 760.0    | *        |
| substructure     | CHEMBL3804952 |          | 0.761905   | 8.0      |          |
| graph            | CHEMBL3805094 |          | 0.826347   | 760.0    | *        |
| pubchem          | CHEMBL3805094 |          | 0.931034   | 760.0    | *        |
| cdk_maccs        | CHEMBL3698947 |          | 0.700000   | 11.0     |          |
| klekota_roth     | CHEMBL3805094 |          | 0.493151   | 760.0    |          |

\*\*\* ic50 ACTIVITY \*\*\* value prediction

based on 8 locally validated fgps ---> 531.260

["TT\_bits", "Pattern", "MFP1", "pubchem", "graph", "FP2", "RDKit7", "hybridization"]

3 rank

Epidermal growth factor receptor erbB1 : Homo sapiens

score: 5.022 on ChEMBL203 based on 7 fingerprints

| Fingerprint type | Ligand        | Tanimoto | Similarity | activity | Valid fg |
|------------------|---------------|----------|------------|----------|----------|
| FeatMFP1         | CHEMBL3754556 |          | 0.680000   | 71.82    | *        |
| MFP1             | CHEMBL1928946 |          | 0.600000   | 108.00   | *        |
| RDKit7           | CHEMBL1928956 |          | 0.506826   | 627.00   |          |
| Pattern          | CHEMBL387187  |          | 0.905192   | 21.00    | *        |
| AP_bits          | CHEMBL3814846 |          | 0.514943   | 3.96     | *        |
| TT_bits          | CHEMBL1928946 |          | 0.477612   | 108.00   |          |
| FP2              | CHEMBL1928956 |          | 0.639785   | 627.00   | *        |
| hybridization    | CHEMBL247228  |          | 0.476804   | 10000.00 |          |
| substructure     | CHEMBL2335018 |          | 0.833333   | 12800.00 |          |
| graph            | CHEMBL1928954 |          | 0.692308   | 1671.00  |          |
| pubchem          | CHEMBL14627   |          | 0.833333   | 74.00    | *        |
| cdk_maccs        | CHEMBL1928956 |          | 0.849057   | 627.00   | *        |

```
klekota_roth CHEMBL3774451      0.404255      582.17
  *** ic50 ACTIVITY *** value prediction
    based on 6 locally validated fgps ---> 576.366
["Pattern", "AP_bits", "MFP1", "pubchem", "FP2", "cdk_maccs"]
```

## MuSSEL Prediction k<sub>i</sub>:

1 rank

Leucine-rich repeat serine/threonine-protein kinase 2 : Homo sapiens  
score: 3.810 on ChEMBL1075104 based on 5 fingerprints

| Fingerprint type | Ligand        | Tanimoto | Similarity | activity | Valid fg |
|------------------|---------------|----------|------------|----------|----------|
| FeatMFP1         | CHEMBL1992581 |          | 0.615385   | 1584.890 |          |
| MFP1             | CHEMBL574738  |          | 0.590909   | 1000.000 | *        |
| RDKit7           | CHEMBL574738  |          | 0.602683   | 1000.000 |          |
| Pattern          | CHEMBL3641887 |          | 0.873391   | 5.200    | *        |
| AP_bits          | CHEMBL1988076 |          | 0.441667   | 2511.890 |          |
| TT_bits          | CHEMBL574738  |          | 0.567164   | 1000.000 | *        |
| FP2              | CHEMBL574738  |          | 0.614458   | 1000.000 |          |
| hybridization    | CHEMBL574738  |          | 0.504902   | 1000.000 |          |
| substructure     | CHEMBL1983111 |          | 0.882353   | 0.631    | *        |
| graph            | CHEMBL574738  |          | 0.733333   | 1000.000 |          |
| pubchem          | CHEMBL574738  |          | 0.896040   | 1000.000 | *        |
| cdk_maccs        | CHEMBL3641833 |          | 0.762712   | 5.200    |          |
| klekota_roth     | CHEMBL1992581 |          | 0.450980   | 1584.890 |          |

\*\*\* ki ACTIVITY \*\*\* value prediction

based on 5 locally validated fgps ---> 600.887

["Pattern", "TT\_bits", "MFP1", "substructure", "pubchem"]

2 rank

Tyrosine-protein kinase ABL : Homo sapiens

score: 3.483 on ChEMBL1862 based on 5 fingerprints

| Fingerprint type | Ligand        | Tanimoto | Similarity | activity | Valid fg |
|------------------|---------------|----------|------------|----------|----------|
| FeatMFP1         | CHEMBL1992581 |          | 0.615385   | 199.53   |          |
| MFP1             | CHEMBL574738  |          | 0.590909   | 25.12    | *        |
| RDKit7           | CHEMBL574738  |          | 0.602683   | 25.12    |          |
| Pattern          | CHEMBL1992306 |          | 0.855580   | 630.96   |          |
| AP_bits          | CHEMBL1992306 |          | 0.546539   | 630.96   | *        |
| TT_bits          | CHEMBL574738  |          | 0.567164   | 25.12    | *        |
| FP2              | CHEMBL574738  |          | 0.614458   | 25.12    |          |
| hybridization    | CHEMBL574738  |          | 0.504902   | 25.12    |          |
| substructure     | CHEMBL1983111 |          | 0.882353   | 251.19   | *        |
| graph            | CHEMBL574738  |          | 0.733333   | 25.12    |          |
| pubchem          | CHEMBL574738  |          | 0.896040   | 25.12    | *        |
| cdk_maccs        | CHEMBL1336    |          | 0.750000   | 158.49   |          |
| klekota_roth     | CHEMBL1973178 |          | 0.460000   | 199.53   |          |

\*\*\* ki ACTIVITY \*\*\* value prediction

based on 5 locally validated fgps ---> 166.683

["AP\_bits", "TT\_bits", "MFP1", "substructure", "pubchem"]

3 rank

Tyrosine-protein kinase receptor RET : Homo sapiens

score: 3.483 on ChEMBL2041 based on 5 fingerprints

| Fingerprint type | Ligand        | Tanimoto | Similarity | activity | Valid fg |
|------------------|---------------|----------|------------|----------|----------|
| FeatMFP1         | CHEMBL1992581 |          | 0.615385   | 199.530  |          |
| MFP1             | CHEMBL574738  |          | 0.590909   | 6.310    | *        |
| RDKit7           | CHEMBL574738  |          | 0.602683   | 6.310    |          |
| Pattern          | CHEMBL1992306 |          | 0.855580   | 7.943    |          |
| AP_bits          | CHEMBL1992306 |          | 0.546539   | 7.943    | *        |
| TT_bits          | CHEMBL574738  |          | 0.567164   | 6.310    | *        |
| FP2              | CHEMBL574738  |          | 0.614458   | 6.310    |          |
| hybridization    | CHEMBL574738  |          | 0.504902   | 6.310    |          |
| substructure     | CHEMBL1983111 |          | 0.882353   | 3.162    | *        |
| graph            | CHEMBL574738  |          | 0.733333   | 6.310    |          |
| pubchem          | CHEMBL574738  |          | 0.896040   | 6.310    | *        |
| cdk_maccs        | CHEMBL1982660 |          | 0.754717   | 100.000  |          |
| klekota_roth     | CHEMBL1992581 |          | 0.450980   | 199.530  |          |

\*\*\* ki ACTIVITY \*\*\* value prediction

based on 5 locally validated fgps ---> 6.007  
["AP\_bits", "TT\_bits", "MFP1", "substructure", "pubchem"]

4 rank

Tyrosine-protein kinase LCK : Homo sapiens

score: 3.483 on ChEMBL258 based on 5 fingerprints

| Fingerprint type | Ligand        | Tanimoto | Similarity | activity | Valid fg |
|------------------|---------------|----------|------------|----------|----------|
| FeatMFP1         | CHEMBL1992581 |          | 0.615385   | 3162.28  |          |
| MFP1             | CHEMBL574738  |          | 0.590909   | 15.85    | *        |
| RDKit7           | CHEMBL574738  |          | 0.602683   | 15.85    |          |
| Pattern          | CHEMBL1992306 |          | 0.855580   | 251.19   |          |
| AP_bits          | CHEMBL1992306 |          | 0.546539   | 251.19   | *        |
| TT_bits          | CHEMBL574738  |          | 0.567164   | 15.85    | *        |
| FP2              | CHEMBL574738  |          | 0.614458   | 15.85    |          |
| hybridization    | CHEMBL574738  |          | 0.504902   | 15.85    |          |
| substructure     | CHEMBL1983111 |          | 0.882353   | 199.53   | *        |
| graph            | CHEMBL574738  |          | 0.733333   | 15.85    |          |
| pubchem          | CHEMBL574738  |          | 0.896040   | 15.85    | *        |
| cdk_maccs        | CHEMBL2170582 |          | 0.803279   | 116.00   |          |
| klekota_roth     | CHEMBL1973178 |          | 0.460000   | 31.62    |          |

\*\*\* ki ACTIVITY \*\*\* value prediction

based on 5 locally validated fgps ---> 99.654

["AP\_bits", "TT\_bits", "MFP1", "substructure", "pubchem"]

5 rank

Tyrosine-protein kinase JAK2 : Homo sapiens

score: 3.483 on ChEMBL2971 based on 5 fingerprints

| Fingerprint type | Ligand        | Tanimoto | Similarity | activity | Valid fg |
|------------------|---------------|----------|------------|----------|----------|
| FeatMFP1         | CHEMBL2420821 |          | 0.576923   | 310.000  |          |
| MFP1             | CHEMBL574738  |          | 0.590909   | 1000.000 | *        |
| RDKit7           | CHEMBL574738  |          | 0.602683   | 1000.000 |          |
| Pattern          | CHEMBL1992306 |          | 0.855580   | 630.960  |          |
| AP_bits          | CHEMBL1992306 |          | 0.546539   | 630.960  | *        |
| TT_bits          | CHEMBL574738  |          | 0.567164   | 1000.000 | *        |
| FP2              | CHEMBL574738  |          | 0.614458   | 1000.000 |          |
| hybridization    | CHEMBL574738  |          | 0.504902   | 1000.000 |          |
| substructure     | CHEMBL1983111 |          | 0.882353   | 3.981    | *        |
| graph            | CHEMBL574738  |          | 0.733333   | 1000.000 |          |
| pubchem          | CHEMBL574738  |          | 0.896040   | 1000.000 | *        |
| cdk_maccs        | CHEMBL2170582 |          | 0.803279   | 130.000  |          |
| klekota_roth     | CHEMBL2002723 |          | 0.431818   | 1995.260 |          |

\*\*\* ki ACTIVITY \*\*\* value prediction

based on 5 locally validated fgps ---> 727.890

["AP\_bits", "TT\_bits", "MFP1", "substructure", "pubchem"]

6 rank

Serine/threonine-protein kinase Aurora-A : Homo sapiens

score: 3.483 on ChEMBL4722 based on 5 fingerprints

| Fingerprint type | Ligand        | Tanimoto | Similarity | activity | Valid fg |
|------------------|---------------|----------|------------|----------|----------|
| FeatMFP1         | CHEMBL1976455 |          | 0.576923   | 1995.260 |          |
| MFP1             | CHEMBL574738  |          | 0.590909   | 1584.890 | *        |
| RDKit7           | CHEMBL574738  |          | 0.602683   | 1584.890 |          |
| Pattern          | CHEMBL1992306 |          | 0.855580   | 501.190  |          |
| AP_bits          | CHEMBL1992306 |          | 0.546539   | 501.190  | *        |
| TT_bits          | CHEMBL574738  |          | 0.567164   | 1584.890 | *        |
| FP2              | CHEMBL574738  |          | 0.614458   | 1584.890 |          |
| hybridization    | CHEMBL574738  |          | 0.504902   | 1584.890 |          |
| substructure     | CHEMBL1983111 |          | 0.882353   | 3.981    | *        |
| graph            | CHEMBL574738  |          | 0.733333   | 1584.890 |          |
| pubchem          | CHEMBL574738  |          | 0.896040   | 1584.890 | *        |

```

    cdk_maccs      CHEMBL1336          0.750000    794.330
    klekota_roth   CHEMBL2002723        0.431818   1584.890
    *** ki ACTIVITY *** value prediction
    based on 5 locally validated fgps ---> 904.998
["AP_bits", "TT_bits", "MFP1", "substructure", "pubchem"]

7 rank
Neurotrophic tyrosine kinase receptor type 2 : Homo sapiens
score: 3.483 on CHEMBL4898 based on 5 fingerprints
Fingerprint type      Ligand      Tanimoto Similarity  activity Valid fg
FeatMFP1  CHEMBL1992581          0.615385    251.19
MFP1      CHEMBL574738          0.590909    251.19      *
RDKit7    CHEMBL574738          0.602683    251.19
Pattern   CHEMBL1992306          0.855580    125.89
AP_bits   CHEMBL1992306          0.546539    125.89      *
TT_bits   CHEMBL574738          0.567164    251.19      *
FP2       CHEMBL574738          0.614458    251.19
hybridization CHEMBL574738          0.504902    251.19
substructure CHEMBL1983111          0.882353     31.62      *
graph     CHEMBL574738          0.733333    251.19
pubchem   CHEMBL574738          0.896040    251.19      *
cdk_maccs CHEMBL1336          0.750000    630.96
klekota_roth CHEMBL1992581          0.450980    251.19
    *** ki ACTIVITY *** value prediction
    based on 5 locally validated fgps ---> 182.216
["AP_bits", "TT_bits", "MFP1", "substructure", "pubchem"]

```

```

8 rank
Serine/threonine-protein kinase TAO1 : Homo sapiens
score: 3.483 on CHEMBL5261 based on 5 fingerprints
Fingerprint type      Ligand      Tanimoto Similarity  activity Valid fg
FeatMFP1  CHEMBL1992306          0.571429     79.43
MFP1      CHEMBL574738          0.590909    501.19      *
RDKit7    CHEMBL574738          0.602683    501.19
Pattern   CHEMBL1992306          0.855580     79.43
AP_bits   CHEMBL1992306          0.546539     79.43      *
TT_bits   CHEMBL574738          0.567164    501.19      *
FP2       CHEMBL574738          0.614458    501.19
hybridization CHEMBL574738          0.504902    501.19
substructure CHEMBL1983111          0.882353    100.00      *
graph     CHEMBL574738          0.733333    501.19
pubchem   CHEMBL574738          0.896040    501.19      *
cdk_maccs CHEMBL1336          0.750000    398.11
klekota_roth CHEMBL2002723          0.431818   5011.87
    *** ki ACTIVITY *** value prediction
    based on 5 locally validated fgps ---> 336.600
["AP_bits", "TT_bits", "MFP1", "substructure", "pubchem"]

```

```

9 rank
Tyrosine-protein kinase receptor TYRO3 : Homo sapiens
score: 3.483 on CHEMBL5314 based on 5 fingerprints
Fingerprint type      Ligand      Tanimoto Similarity  activity Valid fg
FeatMFP1  CHEMBL1986756          0.629630    251.19
MFP1      CHEMBL574738          0.590909   1584.89      *
RDKit7    CHEMBL574738          0.602683   1584.89
Pattern   CHEMBL1992306          0.855580    316.23
AP_bits   CHEMBL1992306          0.546539    316.23      *
TT_bits   CHEMBL574738          0.567164   1584.89      *
FP2       CHEMBL574738          0.614458   1584.89
hybridization CHEMBL574738          0.504902   1584.89

```

```

substructure CHEMBL1983111      0.882353    125.89      *
graph CHEMBL574738             0.733333    1584.89
pubchem CHEMBL574738           0.896040    1584.89      *
cdk_maccs CHEMBL1992306        0.740741     316.23
klekota_roth CHEMBL2002723      0.431818    1258.93
*** ki ACTIVITY *** value prediction
based on 5 locally validated fgps ---> 1039.358
["AP_bits", "TT_bits", "MFP1", "substructure", "pubchem"]

```

10 rank

Proto-oncogene tyrosine-protein kinase ROS : Homo sapiens

score: 3.483 on CHEMBL5568 based on 5 fingerprints

```

Fingerprint type      Ligand      Tanimoto Similarity activity Valid fg
FeatMFP1 CHEMBL1992306      0.571429    1000.00
MFP1 CHEMBL574738          0.590909    1995.26      *
RDKit7 CHEMBL574738          0.602683    1995.26
Pattern CHEMBL1992306        0.855580    1000.00
AP_bits CHEMBL1992306        0.546539    1000.00      *
TT_bits CHEMBL574738          0.567164    1995.26      *
FP2 CHEMBL574738            0.614458    1995.26
hybridization CHEMBL574738      0.504902    1995.26
substructure CHEMBL1983111      0.882353     31.62      *
graph CHEMBL574738            0.733333    1995.26
pubchem CHEMBL574738            0.896040    1995.26      *
cdk_maccs CHEMBL1982660        0.754717     63.10
klekota_roth CHEMBL1992306      0.413793    1000.00
*** ki ACTIVITY *** value prediction
based on 5 locally validated fgps ---> 1403.480
["AP_bits", "TT_bits", "MFP1", "substructure", "pubchem"]

```

11 rank

NT-3 growth factor receptor : Homo sapiens

score: 3.483 on CHEMBL5608 based on 5 fingerprints

```

Fingerprint type      Ligand      Tanimoto Similarity activity Valid fg
FeatMFP1 CHEMBL1992581      0.615385     630.96
MFP1 CHEMBL574738          0.590909    1000.00      *
RDKit7 CHEMBL574738          0.602683    1000.00
Pattern CHEMBL1992306        0.855580     15.85
AP_bits CHEMBL1992306        0.546539     15.85      *
TT_bits CHEMBL574738          0.567164    1000.00      *
FP2 CHEMBL574738            0.614458    1000.00
hybridization CHEMBL574738      0.504902    1000.00
substructure CHEMBL1983111      0.882353     39.81      *
graph CHEMBL574738            0.733333    1000.00
pubchem CHEMBL574738            0.896040    1000.00      *
cdk_maccs CHEMBL1336          0.750000     398.11
klekota_roth CHEMBL1992581      0.450980     630.96
*** ki ACTIVITY *** value prediction
based on 5 locally validated fgps ---> 611.132
["AP_bits", "TT_bits", "MFP1", "substructure", "pubchem"]

```

12 rank

Mitogen-activated protein kinase kinase kinase kinase 4 : Homo sapiens

score: 3.483 on CHEMBL6166 based on 5 fingerprints

```

Fingerprint type      Ligand      Tanimoto Similarity activity Valid fg
FeatMFP1 CHEMBL1992581      0.615385    1000.00
MFP1 CHEMBL574738          0.590909    158.49      *
RDKit7 CHEMBL574738          0.602683    158.49
Pattern CHEMBL1992306        0.855580   10000.00
AP_bits CHEMBL1992306        0.546539   10000.00      *

```

|               |               |          |         |   |
|---------------|---------------|----------|---------|---|
| TT_bits       | CHEMBL574738  | 0.567164 | 158.49  | * |
| FP2           | CHEMBL574738  | 0.614458 | 158.49  |   |
| hybridization | CHEMBL574738  | 0.504902 | 158.49  |   |
| substructure  | CHEMBL1983111 | 0.882353 | 100.00  | * |
| graph         | CHEMBL574738  | 0.733333 | 158.49  |   |
| pubchem       | CHEMBL574738  | 0.896040 | 158.49  | * |
| cdk_maccs     | CHEMBL1982660 | 0.754717 | 63.10   |   |
| klekota_roth  | CHEMBL1992581 | 0.450980 | 1000.00 |   |

\*\*\* ki ACTIVITY \*\*\* value prediction

based on 5 locally validated fgps ---> 2115.094

["AP\_bits", "TT\_bits", "MFP1", "substructure", "pubchem"]

13 rank

Macrophage colony stimulating factor receptor : Homo sapiens

score: 2.936 on ChEMBL1844 based on 4 fingerprints

| Fingerprint type | Ligand        | Tanimoto Similarity | activity | Valid fg |
|------------------|---------------|---------------------|----------|----------|
| FeatMFP1         | CHEMBL1992581 | 0.615385            | 1584.890 |          |
| MFP1             | CHEMBL574738  | 0.590909            | 50.120   | *        |
| RDKit7           | CHEMBL574738  | 0.602683            | 50.120   |          |
| Pattern          | CHEMBL1988838 | 0.828753            | 316.230  |          |
| AP_bits          | CHEMBL1336    | 0.507795            | 158.490  |          |
| TT_bits          | CHEMBL574738  | 0.567164            | 50.120   | *        |
| FP2              | CHEMBL574738  | 0.614458            | 50.120   |          |
| hybridization    | CHEMBL574738  | 0.504902            | 50.120   |          |
| substructure     | CHEMBL1983111 | 0.882353            | 63.100   | *        |
| graph            | CHEMBL574738  | 0.733333            | 50.120   |          |
| pubchem          | CHEMBL574738  | 0.896040            | 50.120   | *        |
| cdk_maccs        | CHEMBL1336    | 0.750000            | 158.490  |          |
| klekota_roth     | CHEMBL1973178 | 0.460000            | 5.012    |          |

\*\*\* ki ACTIVITY \*\*\* value prediction

based on 4 locally validated fgps ---> 53.365

["TT\_bits", "MFP1", "substructure", "pubchem"]

14 rank

Vascular endothelial growth factor receptor 1 : Homo sapiens

score: 2.936 on ChEMBL1868 based on 4 fingerprints

| Fingerprint type | Ligand        | Tanimoto Similarity | activity | Valid fg |
|------------------|---------------|---------------------|----------|----------|
| FeatMFP1         | CHEMBL1992581 | 0.615385            | 316.230  |          |
| MFP1             | CHEMBL574738  | 0.590909            | 31.620   | *        |
| RDKit7           | CHEMBL574738  | 0.602683            | 31.620   |          |
| Pattern          | CHEMBL1988838 | 0.828753            | 79.430   |          |
| AP_bits          | CHEMBL1336    | 0.507795            | 316.230  |          |
| TT_bits          | CHEMBL574738  | 0.567164            | 31.620   | *        |
| FP2              | CHEMBL574738  | 0.614458            | 31.620   |          |
| hybridization    | CHEMBL574738  | 0.504902            | 31.620   |          |
| substructure     | CHEMBL1983111 | 0.882353            | 10.000   | *        |
| graph            | CHEMBL574738  | 0.733333            | 31.620   |          |
| pubchem          | CHEMBL574738  | 0.896040            | 31.620   | *        |
| cdk_maccs        | CHEMBL1982660 | 0.754717            | 125.890  |          |
| klekota_roth     | CHEMBL1973178 | 0.460000            | 0.631    |          |

\*\*\* ki ACTIVITY \*\*\* value prediction

based on 4 locally validated fgps ---> 26.215

["TT\_bits", "MFP1", "substructure", "pubchem"]

15 rank

Platelet-derived growth factor receptor beta : Homo sapiens

score: 2.936 on ChEMBL1913 based on 4 fingerprints

| Fingerprint type | Ligand        | Tanimoto Similarity | activity | Valid fg |
|------------------|---------------|---------------------|----------|----------|
| FeatMFP1         | CHEMBL1992581 | 0.615385            | 1995.260 |          |
| MFP1             | CHEMBL574738  | 0.590909            | 7.943    | *        |

| Fingerprint type | Ligand        | Tanimoto Similarity | activity | Valid fg |
|------------------|---------------|---------------------|----------|----------|
| RDKit7           | CHEMBL574738  | 0.602683            | 7.943    |          |
| Pattern          | CHEMBL574738  | 0.827381            | 7.943    |          |
| AP_bits          | CHEMBL1336    | 0.507795            | 3.981    |          |
| TT_bits          | CHEMBL574738  | 0.567164            | 7.943    | *        |
| FP2              | CHEMBL574738  | 0.614458            | 7.943    |          |
| hybridization    | CHEMBL574738  | 0.504902            | 7.943    |          |
| substructure     | CHEMBL1983111 | 0.882353            | 63.100   | *        |
| graph            | CHEMBL574738  | 0.733333            | 7.943    |          |
| pubchem          | CHEMBL574738  | 0.896040            | 7.943    | *        |
| cdk_maccs        | CHEMBL1336    | 0.750000            | 3.981    |          |
| klekota_roth     | CHEMBL1992581 | 0.450980            | 1995.260 |          |

\*\*\* ki ACTIVITY \*\*\* value prediction  
based on 4 locally validated fgps ---> 21.732  
["TT\_bits", "MFP1", "substructure", "pubchem"]

16 rank

Stem cell growth factor receptor : Homo sapiens

score: 2.936 on ChEMBL1936 based on 4 fingerprints

| Fingerprint type | Ligand        | Tanimoto Similarity | activity | Valid fg |
|------------------|---------------|---------------------|----------|----------|
| FeatMFP1         | CHEMBL2000934 | 0.629630            | 199.530  |          |
| MFP1             | CHEMBL574738  | 0.590909            | 1584.890 | *        |
| RDKit7           | CHEMBL574738  | 0.602683            | 1584.890 |          |
| Pattern          | CHEMBL574738  | 0.827381            | 1584.890 |          |
| AP_bits          | CHEMBL2004438 | 0.492857            | 158.490  |          |
| TT_bits          | CHEMBL574738  | 0.567164            | 1584.890 | *        |
| FP2              | CHEMBL574738  | 0.614458            | 1584.890 |          |
| hybridization    | CHEMBL574738  | 0.504902            | 1584.890 |          |
| substructure     | CHEMBL1983111 | 0.882353            | 251.190  | *        |
| graph            | CHEMBL574738  | 0.733333            | 1584.890 |          |
| pubchem          | CHEMBL574738  | 0.896040            | 1584.890 | *        |
| cdk_maccs        | CHEMBL1971943 | 0.649123            | 316.230  |          |
| klekota_roth     | CHEMBL1973178 | 0.460000            | 1.585    |          |

\*\*\* ki ACTIVITY \*\*\* value prediction  
based on 4 locally validated fgps ---> 1251.465  
["TT\_bits", "MFP1", "substructure", "pubchem"]

17 rank

Platelet-derived growth factor receptor alpha : Homo sapiens

score: 2.936 on ChEMBL2007 based on 4 fingerprints

| Fingerprint type | Ligand        | Tanimoto Similarity | activity | Valid fg |
|------------------|---------------|---------------------|----------|----------|
| FeatMFP1         | CHEMBL574738  | 0.558824            | 79.43    |          |
| MFP1             | CHEMBL574738  | 0.590909            | 79.43    | *        |
| RDKit7           | CHEMBL574738  | 0.602683            | 79.43    |          |
| Pattern          | CHEMBL574738  | 0.827381            | 79.43    |          |
| AP_bits          | CHEMBL1336    | 0.507795            | 1000.00  |          |
| TT_bits          | CHEMBL574738  | 0.567164            | 79.43    | *        |
| FP2              | CHEMBL574738  | 0.614458            | 79.43    |          |
| hybridization    | CHEMBL574738  | 0.504902            | 79.43    |          |
| substructure     | CHEMBL1983111 | 0.882353            | 100.00   | *        |
| graph            | CHEMBL574738  | 0.733333            | 79.43    |          |
| pubchem          | CHEMBL574738  | 0.896040            | 79.43    | *        |
| cdk_maccs        | CHEMBL1336    | 0.750000            | 1000.00  |          |
| klekota_roth     | CHEMBL1336    | 0.387097            | 1000.00  |          |

\*\*\* ki ACTIVITY \*\*\* value prediction  
based on 4 locally validated fgps ---> 84.573  
["TT\_bits", "MFP1", "substructure", "pubchem"]

18 rank

Death-associated protein kinase 3 : Homo sapiens

score: 2.936 on ChEMBL2468 based on 4 fingerprints



| Fingerprint type | Ligand        | Tanimoto | Similarity | activity | Valid fg |
|------------------|---------------|----------|------------|----------|----------|
| FeatMFP1         | CHEMBL574738  |          | 0.558824   | 3981.07  |          |
| MFP1             | CHEMBL574738  |          | 0.590909   | 3981.07  | *        |
| RDKit7           | CHEMBL574738  |          | 0.602683   | 3981.07  |          |
| Pattern          | CHEMBL1988838 |          | 0.828753   | 316.23   |          |
| AP_bits          | CHEMBL411903  |          | 0.476695   | 794.33   |          |
| TT_bits          | CHEMBL574738  |          | 0.567164   | 3981.07  | *        |
| FP2              | CHEMBL574738  |          | 0.614458   | 3981.07  |          |
| hybridization    | CHEMBL574738  |          | 0.504902   | 3981.07  |          |
| substructure     | CHEMBL1983111 |          | 0.882353   | 251.19   | *        |
| graph            | CHEMBL574738  |          | 0.733333   | 3981.07  |          |
| pubchem          | CHEMBL574738  |          | 0.896040   | 3981.07  | *        |
| cdk_maccs        | CHEMBL475251  |          | 0.698413   | 79.43    |          |
| klekota_roth     | CHEMBL1084546 |          | 0.388060   | 1000.00  |          |

\*\*\* ki ACTIVITY \*\*\* value prediction  
based on 4 locally validated fgps ---> 3048.600  
["TT\_bits", "MFP1", "substructure", "pubchem"]

19 rank

Vascular endothelial growth factor receptor 2 : Homo sapiens

score: 2.936 on ChEMBL279 based on 4 fingerprints

| Fingerprint type | Ligand        | Tanimoto | Similarity | activity | Valid fg |
|------------------|---------------|----------|------------|----------|----------|
| FeatMFP1         | CHEMBL1254007 |          | 0.620690   | 0.024    |          |
| MFP1             | CHEMBL574738  |          | 0.590909   | 2.512    | *        |
| RDKit7           | CHEMBL574738  |          | 0.602683   | 2.512    |          |
| Pattern          | CHEMBL400512  |          | 0.845011   | 8.000    |          |
| AP_bits          | CHEMBL394826  |          | 0.509009   | 9.000    |          |
| TT_bits          | CHEMBL574738  |          | 0.567164   | 2.512    | *        |
| FP2              | CHEMBL574738  |          | 0.614458   | 2.512    |          |
| hybridization    | CHEMBL574738  |          | 0.504902   | 2.512    |          |
| substructure     | CHEMBL1983111 |          | 0.882353   | 15.850   | *        |
| graph            | CHEMBL574738  |          | 0.733333   | 2.512    |          |
| pubchem          | CHEMBL574738  |          | 0.896040   | 2.512    | *        |
| cdk_maccs        | CHEMBL248978  |          | 0.811321   | 23.000   |          |
| klekota_roth     | CHEMBL236205  |          | 0.489796   | 80.000   |          |

\*\*\* ki ACTIVITY \*\*\* value prediction  
based on 4 locally validated fgps ---> 5.846  
["TT\_bits", "MFP1", "substructure", "pubchem"]

20 rank

Nerve growth factor receptor Trk-A : Homo sapiens

score: 2.936 on ChEMBL2815 based on 4 fingerprints

| Fingerprint type | Ligand        | Tanimoto | Similarity | activity | Valid fg |
|------------------|---------------|----------|------------|----------|----------|
| FeatMFP1         | CHEMBL1992581 |          | 0.615385   | 10000.00 |          |
| MFP1             | CHEMBL574738  |          | 0.590909   | 1584.89  | *        |
| RDKit7           | CHEMBL574738  |          | 0.602683   | 1584.89  |          |
| Pattern          | CHEMBL1988838 |          | 0.828753   | 125.89   |          |
| AP_bits          | CHEMBL1336    |          | 0.507795   | 1584.89  |          |
| TT_bits          | CHEMBL574738  |          | 0.567164   | 1584.89  | *        |
| FP2              | CHEMBL574738  |          | 0.614458   | 1584.89  |          |
| hybridization    | CHEMBL574738  |          | 0.504902   | 1584.89  |          |
| substructure     | CHEMBL1983111 |          | 0.882353   | 100.00   | *        |
| graph            | CHEMBL574738  |          | 0.733333   | 1584.89  |          |
| pubchem          | CHEMBL574738  |          | 0.896040   | 1584.89  | *        |
| cdk_maccs        | CHEMBL1336    |          | 0.750000   | 1584.89  |          |
| klekota_roth     | CHEMBL1992581 |          | 0.450980   | 10000.00 |          |

\*\*\* ki ACTIVITY \*\*\* value prediction  
based on 4 locally validated fgps ---> 1213.668  
["TT\_bits", "MFP1", "substructure", "pubchem"]

21 rank

Rho-associated protein kinase 2 : Homo sapiens

score: 2.936 on ChEMBL2973 based on 4 fingerprints

| Fingerprint type | Ligand        | Tanimoto | Similarity | activity | Valid fg |
|------------------|---------------|----------|------------|----------|----------|
| FeatMFP1         | CHEMBL574738  |          | 0.558824   | 501.19   |          |
| MFP1             | CHEMBL574738  |          | 0.590909   | 501.19   | *        |
| RDKit7           | CHEMBL574738  |          | 0.602683   | 501.19   |          |
| Pattern          | CHEMBL1997554 |          | 0.831111   | 501.19   |          |
| AP_bits          | CHEMBL1981410 |          | 0.506466   | 1584.89  |          |
| TT_bits          | CHEMBL574738  |          | 0.567164   | 501.19   | *        |
| FP2              | CHEMBL574738  |          | 0.614458   | 501.19   |          |
| hybridization    | CHEMBL574738  |          | 0.504902   | 501.19   |          |
| substructure     | CHEMBL1983111 |          | 0.882353   | 158.49   | *        |
| graph            | CHEMBL574738  |          | 0.733333   | 501.19   |          |
| pubchem          | CHEMBL574738  |          | 0.896040   | 501.19   | *        |
| cdk_maccs        | CHEMBL1997554 |          | 0.673077   | 501.19   |          |
| klekota_roth     | CHEMBL1984363 |          | 0.418182   | 158.49   |          |

\*\*\* ki ACTIVITY \*\*\* value prediction

based on 4 locally validated fgps ---> 415.515

["TT\_bits", "MFP1", "substructure", "pubchem"]

22 rank

Fibroblast growth factor receptor 1 : Homo sapiens

score: 2.936 on ChEMBL3650 based on 4 fingerprints

| Fingerprint type | Ligand        | Tanimoto | Similarity | activity | Valid fg |
|------------------|---------------|----------|------------|----------|----------|
| FeatMFP1         | CHEMBL1992581 |          | 0.615385   | 794.33   |          |
| MFP1             | CHEMBL574738  |          | 0.590909   | 501.19   | *        |
| RDKit7           | CHEMBL574738  |          | 0.602683   | 501.19   |          |
| Pattern          | CHEMBL1988838 |          | 0.828753   | 199.53   |          |
| AP_bits          | CHEMBL1987910 |          | 0.478365   | 1258.93  |          |
| TT_bits          | CHEMBL574738  |          | 0.567164   | 501.19   | *        |
| FP2              | CHEMBL574738  |          | 0.614458   | 501.19   |          |
| hybridization    | CHEMBL574738  |          | 0.504902   | 501.19   |          |
| substructure     | CHEMBL1983111 |          | 0.882353   | 19.95    | *        |
| graph            | CHEMBL574738  |          | 0.733333   | 501.19   |          |
| pubchem          | CHEMBL574738  |          | 0.896040   | 501.19   | *        |
| cdk_maccs        | CHEMBL1982660 |          | 0.754717   | 3981.07  |          |
| klekota_roth     | CHEMBL1992581 |          | 0.450980   | 794.33   |          |

\*\*\* ki ACTIVITY \*\*\* value prediction

based on 4 locally validated fgps ---> 380.880

["TT\_bits", "MFP1", "substructure", "pubchem"]

23 rank

cAMP-dependent protein kinase alpha-catalytic subunit : Homo sapiens

score: 2.936 on ChEMBL4101 based on 4 fingerprints

| Fingerprint type | Ligand        | Tanimoto | Similarity | activity | Valid fg |
|------------------|---------------|----------|------------|----------|----------|
| FeatMFP1         | CHEMBL3580669 |          | 0.592593   | 3000.00  |          |
| MFP1             | CHEMBL574738  |          | 0.590909   | 199.53   | *        |
| RDKit7           | CHEMBL574738  |          | 0.602683   | 199.53   |          |
| Pattern          | CHEMBL1997554 |          | 0.831111   | 199.53   |          |
| AP_bits          | CHEMBL1983393 |          | 0.445623   | 794.33   |          |
| TT_bits          | CHEMBL574738  |          | 0.567164   | 199.53   | *        |
| FP2              | CHEMBL574738  |          | 0.614458   | 199.53   |          |
| hybridization    | CHEMBL574738  |          | 0.504902   | 199.53   |          |
| substructure     | CHEMBL1983111 |          | 0.882353   | 125.89   | *        |
| graph            | CHEMBL574738  |          | 0.733333   | 199.53   |          |
| pubchem          | CHEMBL574738  |          | 0.896040   | 199.53   | *        |
| cdk_maccs        | CHEMBL475251  |          | 0.698413   | 251.19   |          |
| klekota_roth     | CHEMBL2002723 |          | 0.431818   | 1258.93  |          |

\*\*\* ki ACTIVITY \*\*\* value prediction

based on 4 locally validated fgps ---> 181.120  
["TT\_bits", "MFP1", "substructure", "pubchem"]

24 rank

Dual specificity protein kinase CLK4 : Homo sapiens

score: 2.936 on ChEMBL4203 based on 4 fingerprints

| Fingerprint type | Ligand        | Tanimoto | Similarity | activity | Valid fg |
|------------------|---------------|----------|------------|----------|----------|
| FeatMFP1         | CHEMBL1986756 |          | 0.629630   | 63.10    |          |
| MFP1             | CHEMBL574738  |          | 0.590909   | 316.23   | *        |
| RDKit7           | CHEMBL574738  |          | 0.602683   | 316.23   |          |
| Pattern          | CHEMBL1988838 |          | 0.828753   | 251.19   |          |
| AP_bits          | CHEMBL1981410 |          | 0.506466   | 2511.89  |          |
| TT_bits          | CHEMBL574738  |          | 0.567164   | 316.23   | *        |
| FP2              | CHEMBL574738  |          | 0.614458   | 316.23   |          |
| hybridization    | CHEMBL574738  |          | 0.504902   | 316.23   |          |
| substructure     | CHEMBL1983111 |          | 0.882353   | 199.53   | *        |
| graph            | CHEMBL574738  |          | 0.733333   | 316.23   |          |
| pubchem          | CHEMBL574738  |          | 0.896040   | 316.23   | *        |
| cdk_maccs        | CHEMBL1979176 |          | 0.754717   | 15.85    |          |
| klekota_roth     | CHEMBL1992581 |          | 0.450980   | 251.19   |          |

\*\*\* ki ACTIVITY \*\*\* value prediction

based on 4 locally validated fgps ---> 287.055  
["TT\_bits", "MFP1", "substructure", "pubchem"]

25 rank

Dual specificity protein kinase CLK2 : Homo sapiens

score: 2.936 on ChEMBL4225 based on 4 fingerprints

| Fingerprint type | Ligand        | Tanimoto | Similarity | activity | Valid fg |
|------------------|---------------|----------|------------|----------|----------|
| FeatMFP1         | CHEMBL1992581 |          | 0.615385   | 2511.89  |          |
| MFP1             | CHEMBL574738  |          | 0.590909   | 3162.28  | *        |
| RDKit7           | CHEMBL574738  |          | 0.602683   | 3162.28  |          |
| Pattern          | CHEMBL1988838 |          | 0.828753   | 398.11   |          |
| AP_bits          | CHEMBL1981410 |          | 0.506466   | 5011.87  |          |
| TT_bits          | CHEMBL574738  |          | 0.567164   | 3162.28  | *        |
| FP2              | CHEMBL574738  |          | 0.614458   | 3162.28  |          |
| hybridization    | CHEMBL574738  |          | 0.504902   | 3162.28  |          |
| substructure     | CHEMBL1983111 |          | 0.882353   | 630.96   | *        |
| graph            | CHEMBL574738  |          | 0.733333   | 3162.28  |          |
| pubchem          | CHEMBL574738  |          | 0.896040   | 3162.28  | *        |
| cdk_maccs        | CHEMBL1979176 |          | 0.754717   | 1995.26  |          |
| klekota_roth     | CHEMBL1992581 |          | 0.450980   | 2511.89  |          |

\*\*\* ki ACTIVITY \*\*\* value prediction

based on 4 locally validated fgps ---> 2529.450  
["TT\_bits", "MFP1", "substructure", "pubchem"]

26 rank

Maternal embryonic leucine zipper kinase : Homo sapiens

score: 2.936 on ChEMBL4578 based on 4 fingerprints

| Fingerprint type | Ligand        | Tanimoto | Similarity | activity | Valid fg |
|------------------|---------------|----------|------------|----------|----------|
| FeatMFP1         | CHEMBL574738  |          | 0.558824   | 125.89   |          |
| MFP1             | CHEMBL574738  |          | 0.590909   | 125.89   | *        |
| RDKit7           | CHEMBL574738  |          | 0.602683   | 125.89   |          |
| Pattern          | CHEMBL1988838 |          | 0.828753   | 1258.93  |          |
| AP_bits          | CHEMBL1981410 |          | 0.506466   | 630.96   |          |
| TT_bits          | CHEMBL574738  |          | 0.567164   | 125.89   | *        |
| FP2              | CHEMBL574738  |          | 0.614458   | 125.89   |          |
| hybridization    | CHEMBL574738  |          | 0.504902   | 125.89   |          |
| substructure     | CHEMBL1983111 |          | 0.882353   | 199.53   | *        |
| graph            | CHEMBL574738  |          | 0.733333   | 125.89   |          |
| pubchem          | CHEMBL574738  |          | 0.896040   | 125.89   | *        |

```

        cdk_maccs  CHEMBL2001239          0.672131      630.96
        klekota_roth CHEMBL1084546        0.388060       79.43
        *** ki ACTIVITY *** value prediction
        based on 4 locally validated fgps ---> 144.300
        ["TT_bits", "MFP1", "substructure", "pubchem"]

```

27 rank

Mitogen-activated protein kinase kinase kinase kinase 2 : Homo sapiens  
score: 2.936 on CHEMBL5330 based on 4 fingerprints

| Fingerprint type | Ligand        | Tanimoto | Similarity | activity | Valid fg |
|------------------|---------------|----------|------------|----------|----------|
| FeatMFP1         | CHEMBL1992581 |          | 0.615385   | 251.19   |          |
| MFP1             | CHEMBL574738  |          | 0.590909   | 79.43    | *        |
| RDKit7           | CHEMBL574738  |          | 0.602683   | 79.43    |          |
| Pattern          | CHEMBL1988838 |          | 0.828753   | 398.11   |          |
| AP_bits          | CHEMBL1981410 |          | 0.506466   | 1584.89  |          |
| TT_bits          | CHEMBL574738  |          | 0.567164   | 79.43    | *        |
| FP2              | CHEMBL574738  |          | 0.614458   | 79.43    |          |
| hybridization    | CHEMBL574738  |          | 0.504902   | 79.43    |          |
| substructure     | CHEMBL1983111 |          | 0.882353   | 39.81    | *        |
| graph            | CHEMBL574738  |          | 0.733333   | 79.43    |          |
| pubchem          | CHEMBL574738  |          | 0.896040   | 79.43    | *        |
| cdk_maccs        | CHEMBL1979176 |          | 0.754717   | 3162.28  |          |
| klekota_roth     | CHEMBL1992581 |          | 0.450980   | 251.19   |          |

```

        *** ki ACTIVITY *** value prediction
        based on 4 locally validated fgps ---> 69.525
        ["TT_bits", "MFP1", "substructure", "pubchem"]

```

28 rank

Leukocyte tyrosine kinase receptor : Homo sapiens  
score: 2.936 on CHEMBL5627 based on 4 fingerprints

| Fingerprint type | Ligand        | Tanimoto | Similarity | activity | Valid fg |
|------------------|---------------|----------|------------|----------|----------|
| FeatMFP1         | CHEMBL1992581 |          | 0.615385   | 1995.26  |          |
| MFP1             | CHEMBL574738  |          | 0.590909   | 630.96   | *        |
| RDKit7           | CHEMBL574738  |          | 0.602683   | 630.96   |          |
| Pattern          | CHEMBL574738  |          | 0.827381   | 630.96   |          |
| AP_bits          | CHEMBL1965033 |          | 0.478571   | 794.33   |          |
| TT_bits          | CHEMBL574738  |          | 0.567164   | 630.96   | *        |
| FP2              | CHEMBL574738  |          | 0.614458   | 630.96   |          |
| hybridization    | CHEMBL574738  |          | 0.504902   | 630.96   |          |
| substructure     | CHEMBL1983111 |          | 0.882353   | 39.81    | *        |
| graph            | CHEMBL574738  |          | 0.733333   | 630.96   |          |
| pubchem          | CHEMBL574738  |          | 0.896040   | 630.96   | *        |
| cdk_maccs        | CHEMBL574738  |          | 0.638889   | 630.96   |          |
| klekota_roth     | CHEMBL1992581 |          | 0.450980   | 1995.26  |          |

```

        *** ki ACTIVITY *** value prediction
        based on 4 locally validated fgps ---> 483.173
        ["TT_bits", "MFP1", "substructure", "pubchem"]

```

29 rank

Tyrosine-protein kinase FYN : Homo sapiens  
score: 2.601 on CHEMBL1841 based on 4 fingerprints

| Fingerprint type | Ligand        | Tanimoto | Similarity | activity | Valid fg |
|------------------|---------------|----------|------------|----------|----------|
| FeatMFP1         | CHEMBL1992581 |          | 0.615385   | 1584.89  |          |
| MFP1             | CHEMBL574738  |          | 0.590909   | 158.49   | *        |
| RDKit7           | CHEMBL574738  |          | 0.602683   | 158.49   |          |
| Pattern          | CHEMBL1992306 |          | 0.855580   | 251.19   |          |
| AP_bits          | CHEMBL1992306 |          | 0.546539   | 251.19   | *        |
| TT_bits          | CHEMBL574738  |          | 0.567164   | 158.49   | *        |
| FP2              | CHEMBL574738  |          | 0.614458   | 158.49   |          |
| hybridization    | CHEMBL574738  |          | 0.504902   | 158.49   |          |

|              |               |          |         |   |
|--------------|---------------|----------|---------|---|
| substructure | CHEMBL1084546 | 0.764706 | 1995.26 |   |
| graph        | CHEMBL574738  | 0.733333 | 158.49  |   |
| pubchem      | CHEMBL574738  | 0.896040 | 158.49  | * |
| cdk_maccs    | CHEMBL1992306 | 0.740741 | 251.19  |   |
| klekota_roth | CHEMBL1973178 | 0.460000 | 79.43   |   |

\*\*\* ki ACTIVITY \*\*\* value prediction  
based on 4 locally validated fgps ---> 181.665  
["AP\_bits", "TT\_bits", "MFP1", "pubchem"]

# SwissTargetPrediction report:

## Reference:

Gfeller D., Michielin O. & Zoete V.  
 Shaping the interaction landscape of  
 bioactive molecules, *Bioinformatics*  
 (2013) 29:3073-3079.

## Query Molecule

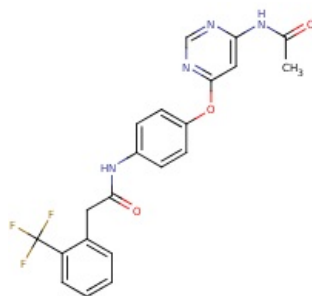

## Frequency of Target Class

| Target                                                      | Uniprot ID | Gene code | ChEMBL ID     | Probability            | # sim. cmpds (3D / 2D) | Target Class       |
|-------------------------------------------------------------|------------|-----------|---------------|------------------------|------------------------|--------------------|
| Vascular endothelial growth factor receptor 1               | P17948     | FLT1      | CHEMBL1868    | <div><div></div></div> | 287 / 90               | Tyr Kinase         |
| Vascular endothelial growth factor receptor 3               | P35916     | FLT4      | CHEMBL1955    | <div><div></div></div> | 283 / 90               | Tyr Kinase         |
| Vascular endothelial growth factor receptor 2 (by homology) | P35968     | KDR       | CHEMBL279     | <div><div></div></div> | 283 / 90               | Tyr Kinase         |
| Macrophage colony-stimulating factor 1 receptor             | P07333     | CSF1R     | CHEMBL1844    | <div><div></div></div> | 69 / 26                | Tyr Kinase         |
| Mast/stem cell growth factor receptor Kit                   | P10721     | KIT       | CHEMBL1936    | <div><div></div></div> | 69 / 26                | Tyr Kinase         |
| Receptor-type tyrosine-protein kinase FLT3                  | P36888     | FLT3      | CHEMBL1974    | <div><div></div></div> | 30 / 26                | Tyr Kinase         |
| Platelet-derived growth factor receptor beta                | P09619     | PDGFRB    | CHEMBL1913    | <div><div></div></div> | 21 / 36                | Tyr Kinase         |
| Platelet-derived growth factor receptor alpha (by homology) | P16234     | PDGFRA    | CHEMBL2007    | <div><div></div></div> | 21 / 36                | Tyr Kinase         |
| Serine/threonine-protein kinase PLK1                        | P53350     | PLK1      | CHEMBL3024    | <div><div></div></div> | 60 / 1                 | Ser_Thr Kinase     |
| Serine/threonine-protein kinase PLK3                        | Q9H4B4     | PLK3      | CHEMBL4897    | <div><div></div></div> | 60 / 1                 | Ser_Thr Kinase     |
| Serine/threonine-protein kinase PLK2 (by homology)          | Q9NYY3     | PLK2      | CHEMBL5938    | <div><div></div></div> | 60 / 1                 | Ser_Thr Kinase     |
| RAF proto-oncogene serine/threonine-protein kinase          | P04049     | RAF1      | CHEMBL1906    | <div><div></div></div> | 144 / 9                | Ser_Thr_Tyr Kinase |
| Serine/threonine-protein kinase B-raf                       | P15056     | BRAF      | CHEMBL5145    | <div><div></div></div> | 144 / 9                | Ser_Thr_Tyr Kinase |
| Serine/threonine-protein kinase A-Raf (by homology)         | P10398     | ARAF      | CHEMBL1169596 | <div><div></div></div> | 144 / 9                | Ser_Thr Kinase     |
| Focal adhesion kinase 1                                     | Q05397     | PTK2      | CHEMBL2695    | <div><div></div></div> | 44 / 2                 | Tyr Kinase         |

# Polypharmacology Browser 2 Prediction:

Targets predicted using NN(ECfp4) + NB(ECfp4).

Save Table

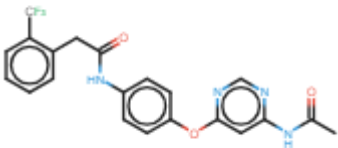

Query molecule

Target class overview

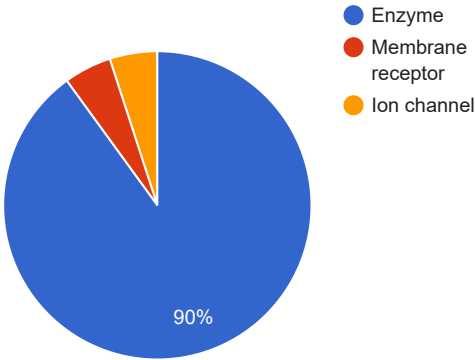

| Rank | ChEMBL ID                                                                                                                                  | Common name                                   | Nearest neighbours |
|------|--------------------------------------------------------------------------------------------------------------------------------------------|-----------------------------------------------|--------------------|
| 1    | CHEMBL279 ( <a href="https://www.ebi.ac.uk/chembl/target/inspect/CHEMBL279">https://www.ebi.ac.uk/chembl/target/inspect/CHEMBL279</a> )    | Vascular endothelial growth factor receptor 2 | Show NN            |
| 2    | CHEMBL203 ( <a href="https://www.ebi.ac.uk/chembl/target/inspect/CHEMBL203">https://www.ebi.ac.uk/chembl/target/inspect/CHEMBL203</a> )    | Epidermal growth factor receptor erbB1        | Show NN            |
| 3    | CHEMBL2276 ( <a href="https://www.ebi.ac.uk/chembl/target/inspect/CHEMBL2276">https://www.ebi.ac.uk/chembl/target/inspect/CHEMBL2276</a> ) | c-Jun N-terminal kinase 1                     | Show NN            |
| 4    | CHEMBL2637 ( <a href="https://www.ebi.ac.uk/chembl/target/inspect/CHEMBL2637">https://www.ebi.ac.uk/chembl/target/inspect/CHEMBL2637</a> ) | c-Jun N-terminal kinase 3                     | Show NN            |
| 5    | CHEMBL1824 ( <a href="https://www.ebi.ac.uk/chembl/target/inspect/CHEMBL1824">https://www.ebi.ac.uk/chembl/target/inspect/CHEMBL1824</a> ) | Receptor protein-tyrosine kinase erbB-2       | Show NN            |
| 6    | CHEMBL1974 ( <a href="https://www.ebi.ac.uk/chembl/target/inspect/CHEMBL1974">https://www.ebi.ac.uk/chembl/target/inspect/CHEMBL1974</a> ) | Tyrosine-protein kinase receptor FLT3         | Show NN            |
| 7    | CHEMBL1844 ( <a href="https://www.ebi.ac.uk/chembl/target/inspect/CHEMBL1844">https://www.ebi.ac.uk/chembl/target/inspect/CHEMBL1844</a> ) | Macrophage colony stimulating factor receptor | Show NN            |
| 8    | CHEMBL3717 ( <a href="https://www.ebi.ac.uk/chembl/target/inspect/CHEMBL3717">https://www.ebi.ac.uk/chembl/target/inspect/CHEMBL3717</a> ) | Hepatocyte growth factor receptor             | Show NN            |
| 9    | CHEMBL5102 ( <a href="https://www.ebi.ac.uk/chembl/target/inspect/CHEMBL5102">https://www.ebi.ac.uk/chembl/target/inspect/CHEMBL5102</a> ) | Vanilloid receptor                            | Show NN            |
| 10   | CHEMBL4722 ( <a href="https://www.ebi.ac.uk/chembl/target/inspect/CHEMBL4722">https://www.ebi.ac.uk/chembl/target/inspect/CHEMBL4722</a> ) | Serine/threonine-protein kinase Aurora-A      | Show NN            |
| 11   | CHEMBL258 ( <a href="https://www.ebi.ac.uk/chembl/target/inspect/CHEMBL258">https://www.ebi.ac.uk/chembl/target/inspect/CHEMBL258</a> )    | Tyrosine-protein kinase LCK                   | Show NN            |
| 12   | CHEMBL260 ( <a href="https://www.ebi.ac.uk/chembl/target/inspect/CHEMBL260">https://www.ebi.ac.uk/chembl/target/inspect/CHEMBL260</a> )    | MAP kinase p38 alpha                          | Show NN            |
| 13   | CHEMBL1868 ( <a href="https://www.ebi.ac.uk/chembl/target/inspect/CHEMBL1868">https://www.ebi.ac.uk/chembl/target/inspect/CHEMBL1868</a> ) | Vascular endothelial growth factor receptor 1 | Show NN            |
| 14   | CHEMBL256 ( <a href="https://www.ebi.ac.uk/chembl/target/inspect/CHEMBL256">https://www.ebi.ac.uk/chembl/target/inspect/CHEMBL256</a> )    | Adenosine A3 receptor                         | Show NN            |
| 15   | CHEMBL267 ( <a href="https://www.ebi.ac.uk/chembl/target/inspect/CHEMBL267">https://www.ebi.ac.uk/chembl/target/inspect/CHEMBL267</a> )    | Tyrosine-protein kinase SRC                   | Show NN            |
| 16   | CHEMBL1955 ( <a href="https://www.ebi.ac.uk/chembl/target/inspect/CHEMBL1955">https://www.ebi.ac.uk/chembl/target/inspect/CHEMBL1955</a> ) | Vascular endothelial growth factor receptor 3 | Show NN            |
| 17   | CHEMBL2815 ( <a href="https://www.ebi.ac.uk/chembl/target/inspect/CHEMBL2815">https://www.ebi.ac.uk/chembl/target/inspect/CHEMBL2815</a> ) | Nerve growth factor receptor Trk-A            | Show NN            |
| 18   | CHEMBL261 ( <a href="https://www.ebi.ac.uk/chembl/target/inspect/CHEMBL261">https://www.ebi.ac.uk/chembl/target/inspect/CHEMBL261</a> )    | Carbonic anhydrase I                          | Show NN            |



|    |                                                                                                                                            |                           |         |
|----|--------------------------------------------------------------------------------------------------------------------------------------------|---------------------------|---------|
| 19 | CHEMBL205 ( <a href="https://www.ebi.ac.uk/chembl/target/inspect/CHEMBL205">https://www.ebi.ac.uk/chembl/target/inspect/CHEMBL205</a> )    | Carbonic anhydrase II     | Show NN |
| 20 | CHEMBL3229 ( <a href="https://www.ebi.ac.uk/chembl/target/inspect/CHEMBL3229">https://www.ebi.ac.uk/chembl/target/inspect/CHEMBL3229</a> ) | Anandamide amidohydrolase | Show NN |
