# Supplementary material for: Accelerating Drug Discovery by Early Protein Drug Target Prediction Based on a Multi-Fingerprint Similarity Search
Source: MDPI journal article supplement (doi:10.3390/molecules24122233), 2019-06-14
Supplement: s1 [file s1]

**MuSSel not predicted**

# SwissTargetPrediction report:

## Reference:

Gfeller D., Michielin O. & Zoete V.  
Shaping the interaction landscape of  
bioactive molecules, *Bioinformatics*  
(2013) 29:3073-3079.

## Query Molecule

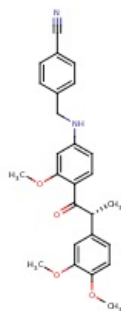

## Frequency of Target Class

| Target                                                        | Uniprot ID | Gene code | ChEMBL ID     | Probability            | # sim. cmpds (3D / 2D) | Target Class    |
|---------------------------------------------------------------|------------|-----------|---------------|------------------------|------------------------|-----------------|
| Cholinesterase ( <i>by homology</i> )                         | P06276     | BCHE      | CHEMBL1914    | <div><div></div></div> | 92 / 30                | Enzyme          |
| Acetylcholinesterase                                          | P22303     | ACHE      | CHEMBL220     | <div><div></div></div> | 92 / 30                | Enzyme          |
| Arachidonate 5-lipoxygenase                                   | P09917     | ALOX5     | CHEMBL215     | <div><div></div></div> | 19 / 15                | Enzyme          |
| Arachidonate 15-lipoxygenase                                  | P16050     | ALOX15    | CHEMBL2903    | <div><div></div></div> | 18 / 15                | Enzyme          |
| Arachidonate 12-lipoxygenase, 12S-type ( <i>by homology</i> ) | P18054     | ALOX12    | CHEMBL3687    | <div><div></div></div> | 18 / 15                | Enzyme          |
| Arachidonate 15-lipoxygenase B ( <i>by homology</i> )         | O15296     | ALOX15B   | CHEMBL2457    | <div><div></div></div> | 18 / 15                | Enzyme          |
| Epidermis-type lipoxygenase 3 ( <i>by homology</i> )          | Q9BYJ1     | ALOXE3    |               | <div><div></div></div> | 18 / 15                | Enzyme          |
| Microtubule-associated protein tau                            | P10636     | MAPT      | CHEMBL1293224 | <div><div></div></div> | 1170 / 43              | Unclassified    |
| Arachidonate 12-lipoxygenase, 12R-type ( <i>by homology</i> ) | O75342     | ALOX12B   |               | <div><div></div></div> | 17 / 1                 | Enzyme          |
| FAD-linked sulfhydryl oxidase ALR                             | P55789     | GFER      | CHEMBL1741189 | <div><div></div></div> | 60 / 9                 | Enzyme          |
| Heat shock protein HSP 90-alpha                               | P07900     | HSP90AA1  | CHEMBL3880    | <div><div></div></div> | 29 / 1                 | Cytosolic other |
| Heat shock protein HSP 90-beta                                | P08238     | HSP90AB1  | CHEMBL4303    | <div><div></div></div> | 29 / 1                 | Cytosolic other |
| Endoplasmic ( <i>by homology</i> )                            | P14625     | HSP90B1   | CHEMBL1075323 | <div><div></div></div> | 29 / 1                 | Unclassified    |
| Muscleblind-like protein 1                                    | Q9NR56     | MBNL1     | CHEMBL1293317 | <div><div></div></div> | 426 / 19               | Unclassified    |
| Muscleblind-like protein 2 ( <i>by homology</i> )             | Q5VZF2     | MBNL2     |               | <div><div></div></div> | 426 / 19               | Unclassified    |

**Polypharmacology Browser 2 not predicted**
