# Supplementary material for: Accelerating Drug Discovery by Early Protein Drug Target Prediction Based on a Multi-Fingerprint Similarity Search
Source: MDPI journal article supplement (doi:10.3390/molecules24122233), 2019-06-14
Supplement: s1 [file s1]

## MuSSEL Prediction k<sub>i</sub>:

1 rank

Canalicular multispecific organic anion transporter 1 : Rattus norvegicus  
score: 4.145 on ChEMBL2073676 based on 5 fingerprints

| Fingerprint type | Ligand        | Tanimoto Similarity | activity | Valid fg |
|------------------|---------------|---------------------|----------|----------|
| FeatMFP1         | CHEMBL1743143 | 0.619048            | 1620.0   |          |
| MFP1             | CHEMBL1743143 | 0.507463            | 1620.0   |          |
| RDKit7           | CHEMBL1743143 | 0.899092            | 1620.0   | *        |
| Pattern          | CHEMBL1743143 | 0.925813            | 1620.0   | *        |
| AP_bits          | CHEMBL1743143 | 0.518750            | 1620.0   |          |
| TT_bits          | CHEMBL2074578 | 0.423729            | 18300.0  |          |
| FP2              | CHEMBL1743143 | 0.709779            | 1620.0   | *        |
| hybridization    | CHEMBL1743143 | 0.765333            | 1620.0   | *        |
| substructure     | CHEMBL2074700 | 0.666667            | 56900.0  |          |
| graph            | CHEMBL2074712 | 0.609442            | 96600.0  |          |
| pubchem          | CHEMBL2074712 | 0.824786            | 96600.0  |          |
| cdk_maccs        | CHEMBL2074712 | 0.845238            | 96600.0  | *        |
| klekota_roth     | CHEMBL1743143 | 0.536313            | 1620.0   |          |

\*\*\* ki ACTIVITY \*\*\* value prediction

based on 5 locally validated fgps ---> 11046.981

["Pattern", "RDKit7", "hybridization", "cdk\_maccs", "FP2"]

## MuSsel Prediction IC<sub>50</sub>:

1 rank

DNA topoisomerase I : Homo sapiens

score: 9.090 on ChEMBL1781 based on 12 fingerprints

| Fingerprint type | Ligand       | Tanimoto | Similarity | activity | Valid fg |
|------------------|--------------|----------|------------|----------|----------|
| FeatMFP1         | ChEMBL72627  |          | 0.684211   | 1118.0   | *        |
| MFP1             | ChEMBL545250 |          | 0.586207   | 430.0    | *        |
| RDKit7           | ChEMBL545250 |          | 0.920808   | 430.0    | *        |
| Pattern          | ChEMBL159322 |          | 0.896690   | 340.0    | *        |
| AP_bits          | ChEMBL312690 |          | 0.574635   | 4597.0   | *        |
| TT_bits          | ChEMBL539032 |          | 0.638095   | 5500.0   | *        |
| FP2              | ChEMBL543849 |          | 0.791667   | 1100.0   | *        |
| hybridization    | ChEMBL545250 |          | 0.843165   | 430.0    | *        |
| substructure     | ChEMBL170532 |          | 0.724138   | 2100.0   |          |
| graph            | ChEMBL539032 |          | 0.775862   | 5500.0   | *        |
| pubchem          | ChEMBL88605  |          | 0.840517   | 21000.0  | *        |
| cdk_maccs        | ChEMBL275538 |          | 0.878049   | 1494.0   | *        |
| klekota_roth     | ChEMBL539032 |          | 0.660256   | 5500.0   | *        |

\*\*\* ic50 ACTIVITY \*\*\* value prediction

based on 12 locally validated fgps ---> 5875.206

["TT\_bits", "cdk\_maccs", "Pattern", "FP2", "MFP1", "klekota\_roth",  
"pubchem", "graph", "AP\_bits", "FeatMFP1", "RDKit7", "hybridization"]

2 rank

DNA topoisomerase I : Mus musculus

score: 7.201 on ChEMBL2814 based on 10 fingerprints

| Fingerprint type | Ligand       | Tanimoto | Similarity | activity | Valid fg |
|------------------|--------------|----------|------------|----------|----------|
| FeatMFP1         | ChEMBL445883 |          | 0.564103   | 12000.0  |          |
| MFP1             | ChEMBL44044  |          | 0.533333   | 41000.0  | *        |
| RDKit7           | ChEMBL84     |          | 0.911797   | 20000.0  | *        |
| Pattern          | ChEMBL289665 |          | 0.852329   | 5000.0   | *        |
| AP_bits          | ChEMBL289665 |          | 0.478326   | 5000.0   | *        |
| TT_bits          | ChEMBL44044  |          | 0.539823   | 41000.0  | *        |
| FP2              | ChEMBL84     |          | 0.784722   | 20000.0  | *        |
| hybridization    | ChEMBL837    |          | 0.775510   | 4000.0   | *        |
| substructure     | ChEMBL65     |          | 0.586207   | 12000.0  |          |
| graph            | ChEMBL289665 |          | 0.720339   | 5000.0   |          |
| pubchem          | ChEMBL289665 |          | 0.842553   | 5000.0   | *        |
| cdk_maccs        | ChEMBL289665 |          | 0.886076   | 5000.0   | *        |
| klekota_roth     | ChEMBL44044  |          | 0.596273   | 41000.0  | *        |

\*\*\* ic50 ACTIVITY \*\*\* value prediction

based on 10 locally validated fgps ---> 22518.935

["TT\_bits", "cdk\_maccs", "Pattern", "AP\_bits", "MFP1", "klekota\_roth",  
"pubchem", "FP2", "RDKit7", "hybridization"]

3 rank

Nuclear receptor coactivator 3 : Homo sapiens

score: 7.184 on ChEMBL1615382 based on 10 fingerprints

| Fingerprint type | Ligand        | Tanimoto | Similarity | activity | Valid fg |
|------------------|---------------|----------|------------|----------|----------|
| FeatMFP1         | ChEMBL1566908 |          | 0.675676   | 3860.0   |          |
| MFP1             | ChEMBL1445386 |          | 0.532258   | 1049.0   | *        |
| RDKit7           | ChEMBL1200512 |          | 0.897051   | 1315.0   | *        |
| Pattern          | ChEMBL1200512 |          | 0.901508   | 1315.0   | *        |
| AP_bits          | ChEMBL1200512 |          | 0.520408   | 1315.0   | *        |
| TT_bits          | ChEMBL1445386 |          | 0.517857   | 1049.0   | *        |
| FP2              | ChEMBL1200512 |          | 0.762215   | 1315.0   | *        |
| hybridization    | ChEMBL1200512 |          | 0.760274   | 1315.0   | *        |
| substructure     | ChEMBL1566908 |          | 0.714286   | 3860.0   |          |
| graph            | ChEMBL1200512 |          | 0.742489   | 1315.0   |          |
| pubchem          | ChEMBL1200512 |          | 0.841202   | 1315.0   | *        |
| cdk_maccs        | ChEMBL1200512 |          | 0.857143   | 1315.0   | *        |

```

    klekota_roth CHEMBL1445386          0.593750    1049.0      *
    *** ic50 ACTIVITY *** value prediction
    based on 10 locally validated fgps ---> 1183.069
    ["TT_bits", "cdk_maccs", "Pattern", "AP_bits", "MFP1", "klekota_roth",
    "pubchem", "FP2", "RDKit7", "hybridization"]

```

4 rank

Cytochrome P450 3A4 : Homo sapiens

score: 6.051 on ChEMBL340 based on 8 fingerprints

| Fingerprint type | Ligand        | Tanimoto | Similarity | activity | Valid fg |
|------------------|---------------|----------|------------|----------|----------|
| FeatMFP1         | CHEMBL2048199 |          | 0.575000   | 4000.0   |          |
| MFP1             | CHEMBL84      |          | 0.500000   | 1521.1   |          |
| RDKit7           | CHEMBL84      |          | 0.911797   | 1521.1   | *        |
| Pattern          | CHEMBL84      |          | 0.847893   | 1521.1   | *        |
| AP_bits          | CHEMBL3634394 |          | 0.528283   | 10000.0  | *        |
| TT_bits          | CHEMBL84      |          | 0.517857   | 1521.1   | *        |
| FP2              | CHEMBL84      |          | 0.784722   | 1521.1   | *        |
| hybridization    | CHEMBL84      |          | 0.774052   | 1521.1   | *        |
| substructure     | CHEMBL1778481 |          | 0.785714   | 8900.0   |          |
| graph            | CHEMBL84      |          | 0.673913   | 1521.1   |          |
| pubchem          | CHEMBL84      |          | 0.834061   | 1521.1   | *        |
| cdk_maccs        | CHEMBL84      |          | 0.851852   | 1521.1   | *        |
| klekota_roth     | CHEMBL84      |          | 0.586420   | 1521.1   |          |

```

    *** ic50 ACTIVITY *** value prediction
    based on 8 locally validated fgps ---> 8007.669
    ["TT_bits", "cdk_maccs", "Pattern", "AP_bits", "pubchem", "FP2",
    "RDKit7", "hybridization"]

```

5 rank

ATP-binding cassette sub-family G member 2 : Homo sapiens

score: 6.008 on ChEMBL5393 based on 8 fingerprints

| Fingerprint type | Ligand        | Tanimoto | Similarity | activity | Valid fg |
|------------------|---------------|----------|------------|----------|----------|
| FeatMFP1         | CHEMBL837     |          | 0.500000   | 176.0    |          |
| MFP1             | CHEMBL84      |          | 0.500000   | 170.0    |          |
| RDKit7           | CHEMBL84      |          | 0.911797   | 170.0    | *        |
| Pattern          | CHEMBL84      |          | 0.847893   | 170.0    | *        |
| AP_bits          | CHEMBL2013174 |          | 0.484689   | 1400.0   | *        |
| TT_bits          | CHEMBL84      |          | 0.517857   | 170.0    | *        |
| FP2              | CHEMBL84      |          | 0.784722   | 170.0    | *        |
| hybridization    | CHEMBL837     |          | 0.775510   | 176.0    | *        |
| substructure     | CHEMBL551696  |          | 0.633333   | 9100.0   |          |
| graph            | CHEMBL84      |          | 0.673913   | 170.0    |          |
| pubchem          | CHEMBL84      |          | 0.834061   | 170.0    | *        |
| cdk_maccs        | CHEMBL84      |          | 0.851852   | 170.0    | *        |
| klekota_roth     | CHEMBL84      |          | 0.586420   | 170.0    |          |

```

    *** ic50 ACTIVITY *** value prediction
    based on 8 locally validated fgps ---> 272.749
    ["TT_bits", "cdk_maccs", "Pattern", "AP_bits", "pubchem", "FP2",
    "RDKit7", "hybridization"]

```

6 rank

Alpha trans-inducing protein (VP16) : Herpes simplex virus (type 1 / strain 17)

score: 5.540 on ChEMBL4218 based on 7 fingerprints

| Fingerprint type | Ligand        | Tanimoto | Similarity | activity | Valid fg |
|------------------|---------------|----------|------------|----------|----------|
| FeatMFP1         | CHEMBL1566908 |          | 0.675676   | 18440.0  |          |
| MFP1             | CHEMBL1200512 |          | 0.470588   | 41996.0  |          |
| RDKit7           | CHEMBL1200512 |          | 0.897051   | 41996.0  | *        |
| Pattern          | CHEMBL1200512 |          | 0.901508   | 41996.0  | *        |
| AP_bits          | CHEMBL1200512 |          | 0.520408   | 41996.0  | *        |

|               |               |          |         |   |
|---------------|---------------|----------|---------|---|
| TT_bits       | CHEMBL1200512 | 0.404255 | 41996.0 |   |
| FP2           | CHEMBL1200512 | 0.762215 | 41996.0 | * |
| hybridization | CHEMBL1200512 | 0.760274 | 41996.0 | * |
| substructure  | CHEMBL1566908 | 0.714286 | 18440.0 |   |
| graph         | CHEMBL1200512 | 0.742489 | 41996.0 |   |
| pubchem       | CHEMBL1200512 | 0.841202 | 41996.0 | * |
| cdk_maccs     | CHEMBL1200512 | 0.857143 | 41996.0 | * |
| klekota_roth  | CHEMBL1200512 | 0.540541 | 41996.0 |   |

\*\*\* ic50 ACTIVITY \*\*\* value prediction  
 based on 7 locally validated fgps ---> 37322.814  
 ["cdk\_maccs", "Pattern", "AP\_bits", "pubchem", "FP2", "RDKit7",  
 "hybridization"]

#### 7 rank

Solute carrier family 22 member 2 : Homo sapiens

score: 5.522 on ChEMBL1743122 based on 7 fingerprints

| Fingerprint type | Ligand    | Tanimoto Similarity | activity | Valid fg |
|------------------|-----------|---------------------|----------|----------|
| FeatMFP1         | CHEMBL84  | 0.465116            | 61000.0  |          |
| MFP1             | CHEMBL84  | 0.500000            | 61000.0  |          |
| RDKit7           | CHEMBL84  | 0.911797            | 61000.0  | *        |
| Pattern          | CHEMBL84  | 0.847893            | 61000.0  | *        |
| AP_bits          | CHEMBL603 | 0.467254            | 9700.0   |          |
| TT_bits          | CHEMBL84  | 0.517857            | 61000.0  | *        |
| FP2              | CHEMBL84  | 0.784722            | 61000.0  | *        |
| hybridization    | CHEMBL84  | 0.774052            | 61000.0  | *        |
| substructure     | CHEMBL85  | 0.545455            | 11000.0  |          |
| graph            | CHEMBL84  | 0.673913            | 61000.0  |          |
| pubchem          | CHEMBL84  | 0.834061            | 61000.0  | *        |
| cdk_maccs        | CHEMBL84  | 0.851852            | 61000.0  | *        |
| klekota_roth     | CHEMBL84  | 0.586420            | 61000.0  |          |

\*\*\* ic50 ACTIVITY \*\*\* value prediction  
 based on 7 locally validated fgps ---> 60280.389  
 ["TT\_bits", "cdk\_maccs", "Pattern", "pubchem", "FP2", "RDKit7",  
 "hybridization"]

#### 8 rank

Multidrug and toxin extrusion protein 1 : Homo sapiens

score: 5.522 on ChEMBL1743126 based on 7 fingerprints

| Fingerprint type | Ligand     | Tanimoto Similarity | activity | Valid fg |
|------------------|------------|---------------------|----------|----------|
| FeatMFP1         | CHEMBL84   | 0.465116            | 1300.0   |          |
| MFP1             | CHEMBL84   | 0.500000            | 1300.0   |          |
| RDKit7           | CHEMBL84   | 0.911797            | 1300.0   | *        |
| Pattern          | CHEMBL84   | 0.847893            | 1300.0   | *        |
| AP_bits          | CHEMBL603  | 0.467254            | 1300.0   |          |
| TT_bits          | CHEMBL84   | 0.517857            | 1300.0   | *        |
| FP2              | CHEMBL84   | 0.784722            | 1300.0   | *        |
| hybridization    | CHEMBL84   | 0.774052            | 1300.0   | *        |
| substructure     | CHEMBL1017 | 0.642857            | 17900.0  |          |
| graph            | CHEMBL84   | 0.673913            | 1300.0   |          |
| pubchem          | CHEMBL84   | 0.834061            | 1300.0   | *        |
| cdk_maccs        | CHEMBL84   | 0.851852            | 1300.0   | *        |
| klekota_roth     | CHEMBL84   | 0.586420            | 1300.0   |          |

\*\*\* ic50 ACTIVITY \*\*\* value prediction  
 based on 7 locally validated fgps ---> 1397.245  
 ["TT\_bits", "cdk\_maccs", "Pattern", "pubchem", "FP2", "RDKit7",  
 "hybridization"]

#### 9 rank

Multidrug and toxin extrusion protein 2 : Homo sapiens

score: 5.522 on ChEMBL1743127 based on 7 fingerprints

| Fingerprint type | Ligand    | Tanimoto | Similarity | activity | Valid | fg |
|------------------|-----------|----------|------------|----------|-------|----|
| FeatMFP1         | CHEMBL84  |          | 0.465116   | 8600.0   |       |    |
| MFP1             | CHEMBL84  |          | 0.500000   | 8600.0   |       |    |
| RDKit7           | CHEMBL84  |          | 0.911797   | 8600.0   | *     |    |
| Pattern          | CHEMBL84  |          | 0.847893   | 8600.0   | *     |    |
| AP_bits          | CHEMBL603 |          | 0.467254   | 7600.0   |       |    |
| TT_bits          | CHEMBL84  |          | 0.517857   | 8600.0   | *     |    |
| FP2              | CHEMBL84  |          | 0.784722   | 8600.0   | *     |    |
| hybridization    | CHEMBL84  |          | 0.774052   | 8600.0   | *     |    |
| substructure     | CHEMBL46  |          | 0.533333   | 160.0    |       |    |
| graph            | CHEMBL84  |          | 0.673913   | 8600.0   |       |    |
| pubchem          | CHEMBL84  |          | 0.834061   | 8600.0   | *     |    |
| cdk_maccs        | CHEMBL84  |          | 0.851852   | 8600.0   | *     |    |
| klekota_roth     | CHEMBL84  |          | 0.586420   | 8600.0   |       |    |

\*\*\* ic50 ACTIVITY \*\*\* value prediction

based on 7 locally validated fgps ---> 8859.319

["TT\_bits", "cdk\_maccs", "Pattern", "pubchem", "FP2", "RDKit7",  
"hybridization"]

10 rank

Hypoxia-inducible factor 1 alpha : Homo sapiens

score: 5.522 on ChEMBL4261 based on 7 fingerprints

| Fingerprint type | Ligand       | Tanimoto | Similarity | activity | Valid | fg |
|------------------|--------------|----------|------------|----------|-------|----|
| FeatMFP1         | CHEMBL84     |          | 0.465116   | 60.0     |       |    |
| MFP1             | CHEMBL84     |          | 0.500000   | 60.0     |       |    |
| RDKit7           | CHEMBL84     |          | 0.911797   | 60.0     | *     |    |
| Pattern          | CHEMBL84     |          | 0.847893   | 60.0     | *     |    |
| AP_bits          | CHEMBL383824 |          | 0.455711   | 57.0     |       |    |
| TT_bits          | CHEMBL84     |          | 0.517857   | 60.0     | *     |    |
| FP2              | CHEMBL84     |          | 0.784722   | 60.0     | *     |    |
| hybridization    | CHEMBL84     |          | 0.774052   | 60.0     | *     |    |
| substructure     | CHEMBL430393 |          | 0.655172   | 800.0    |       |    |
| graph            | CHEMBL84     |          | 0.673913   | 60.0     |       |    |
| pubchem          | CHEMBL84     |          | 0.834061   | 60.0     | *     |    |
| cdk_maccs        | CHEMBL84     |          | 0.851852   | 60.0     | *     |    |
| klekota_roth     | CHEMBL84     |          | 0.586420   | 60.0     |       |    |

\*\*\* ic50 ACTIVITY \*\*\* value prediction

based on 7 locally validated fgps ---> 105.797

["TT\_bits", "cdk\_maccs", "Pattern", "pubchem", "FP2", "RDKit7",  
"hybridization"]

# SwissTargetPrediction report:

## Reference:

Gfeller D., Michielin O. & Zoete V.  
Shaping the interaction landscape of  
bioactive molecules, *Bioinformatics*  
(2013) 29:3073-3079.

## Query Molecule

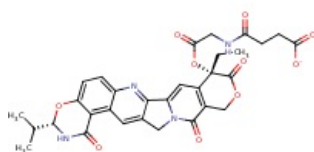

## Frequency of Target Class

| Target                                                    | Uniprot ID    | Gene code   | ChEMBL ID     | Probability            | # sim. cmpds (3D / 2D) | Target Class      |
|-----------------------------------------------------------|---------------|-------------|---------------|------------------------|------------------------|-------------------|
| 22 kDa interstitial collagenase                           | P03956        | MMP1        | CHEMBL332     | <div><div></div></div> | 34 / 1                 | Metallo Protease  |
| Stromelysin-1 ( <i>by homology</i> )                      | P08254        | MMP3        | CHEMBL283     | <div><div></div></div> | 34 / 1                 | Metallo Protease  |
| Collagenase 3                                             | P45452        | MMP13       | CHEMBL280     | <div><div></div></div> | 34 / 1                 | Metallo Protease  |
| Stromelysin-2 ( <i>by homology</i> )                      | P09238        | MMP10       | CHEMBL4270    | <div><div></div></div> | 34 / 1                 | Metallo Protease  |
| Macrophage metalloelastase ( <i>by homology</i> )         | P39900        | MMP12       | CHEMBL4393    | <div><div></div></div> | 34 / 1                 | Metallo Protease  |
| Matrix metalloproteinase-27 ( <i>by homology</i> )        | Q9H306        | MMP27       |               | <div><div></div></div> | 34 / 1                 | Metallo Protease  |
| Neutrophil collagenase                                    | P22894        | MMP8        | CHEMBL4588    | <div><div></div></div> | 5 / 1                  | Metallo Protease  |
| Complex                                                   | P06756/P05106 | ITGAV/ITGB3 | CHEMBL1907598 | <div><div></div></div> | 44 / 3                 | Membrane receptor |
| Complex                                                   | P06756/P18084 | ITGAV/ITGB5 | CHEMBL2096675 | <div><div></div></div> | 6 / 3                  | Membrane receptor |
| Muscleblind-like protein 1                                | Q9NR56        | MBNL1       | CHEMBL1293317 | <div><div></div></div> | 5 / 3                  | Unclassified      |
| Muscleblind-like protein 2 ( <i>by homology</i> )         | Q5VZF2        | MBNL2       |               | <div><div></div></div> | 5 / 3                  | Unclassified      |
| Muscleblind-like protein 3 ( <i>by homology</i> )         | Q9NUK0        | MBNL3       |               | <div><div></div></div> | 5 / 3                  | Unclassified      |
| DNA topoisomerase 1                                       | P11387        | TOP1        | CHEMBL1781    | <div><div></div></div> | 0 / 160                | Enzyme            |
| DNA topoisomerase I, mitochondrial ( <i>by homology</i> ) | Q969P6        | TOP1MT      |               | <div><div></div></div> | 0 / 160                | Enzyme            |
| Cytochrome P450 3A4                                       | P08684        | CYP3A4      | CHEMBL340     | <div><div></div></div> | 0 / 1                  | Enzyme            |

## Polypharmacology Browser 2 Prediction:

Targets predicted using NN(ECfp4) + NB(ECfp4).

## Save Table

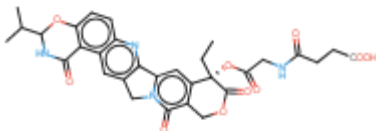

Query molecule

## Target class overview

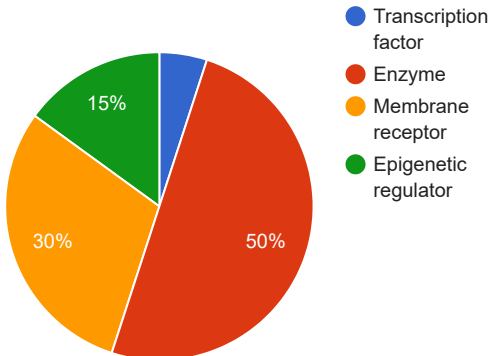

| Rank | ChEMBL ID                                                                                                                                  | Common name                            | Nearest neighbours |
|------|--------------------------------------------------------------------------------------------------------------------------------------------|----------------------------------------|--------------------|
| 1    | CHEMBL1781 ( <a href="https://www.ebi.ac.uk/chembl/target/inspect/CHEMBL1781">https://www.ebi.ac.uk/chembl/target/inspect/CHEMBL1781</a> ) | DNA topoisomerase I                    | Show NN            |
| 2    | CHEMBL325 ( <a href="https://www.ebi.ac.uk/chembl/target/inspect/CHEMBL325">https://www.ebi.ac.uk/chembl/target/inspect/CHEMBL325</a> )    | Histone deacetylase 1                  | Show NN            |
| 3    | CHEMBL1865 ( <a href="https://www.ebi.ac.uk/chembl/target/inspect/CHEMBL1865">https://www.ebi.ac.uk/chembl/target/inspect/CHEMBL1865</a> ) | Histone deacetylase 6                  | Show NN            |
| 4    | CHEMBL3192 ( <a href="https://www.ebi.ac.uk/chembl/target/inspect/CHEMBL3192">https://www.ebi.ac.uk/chembl/target/inspect/CHEMBL3192</a> ) | Histone deacetylase 8                  | Show NN            |
| 5    | CHEMBL1945 ( <a href="https://www.ebi.ac.uk/chembl/target/inspect/CHEMBL1945">https://www.ebi.ac.uk/chembl/target/inspect/CHEMBL1945</a> ) | Melatonin receptor 1A                  | Show NN            |
| 6    | CHEMBL2334 ( <a href="https://www.ebi.ac.uk/chembl/target/inspect/CHEMBL2334">https://www.ebi.ac.uk/chembl/target/inspect/CHEMBL2334</a> ) | Caspase-3                              | Show NN            |
| 7    | CHEMBL1946 ( <a href="https://www.ebi.ac.uk/chembl/target/inspect/CHEMBL1946">https://www.ebi.ac.uk/chembl/target/inspect/CHEMBL1946</a> ) | Melatonin receptor 1B                  | Show NN            |
| 8    | CHEMBL1835 ( <a href="https://www.ebi.ac.uk/chembl/target/inspect/CHEMBL1835">https://www.ebi.ac.uk/chembl/target/inspect/CHEMBL1835</a> ) | Thromboxane-A synthase                 | Show NN            |
| 9    | CHEMBL217 ( <a href="https://www.ebi.ac.uk/chembl/target/inspect/CHEMBL217">https://www.ebi.ac.uk/chembl/target/inspect/CHEMBL217</a> )    | Dopamine D2 receptor                   | Show NN            |
| 10   | CHEMBL2069 ( <a href="https://www.ebi.ac.uk/chembl/target/inspect/CHEMBL2069">https://www.ebi.ac.uk/chembl/target/inspect/CHEMBL2069</a> ) | Thromboxane A2 receptor                | Show NN            |
| 11   | CHEMBL4829 ( <a href="https://www.ebi.ac.uk/chembl/target/inspect/CHEMBL4829">https://www.ebi.ac.uk/chembl/target/inspect/CHEMBL4829</a> ) | Acetyl-CoA carboxylase 2               | Show NN            |
| 12   | CHEMBL3892 ( <a href="https://www.ebi.ac.uk/chembl/target/inspect/CHEMBL3892">https://www.ebi.ac.uk/chembl/target/inspect/CHEMBL3892</a> ) | Sphingosine 1-phosphate receptor Edg-3 | Show NN            |
| 13   | CHEMBL220 ( <a href="https://www.ebi.ac.uk/chembl/target/inspect/CHEMBL220">https://www.ebi.ac.uk/chembl/target/inspect/CHEMBL220</a> )    | Acetylcholinesterase                   | Show NN            |
| 14   | CHEMBL204 ( <a href="https://www.ebi.ac.uk/chembl/target/inspect/CHEMBL204">https://www.ebi.ac.uk/chembl/target/inspect/CHEMBL204</a> )    | Thrombin                               | Show NN            |
| 15   | CHEMBL3105 ( <a href="https://www.ebi.ac.uk/chembl/target/inspect/CHEMBL3105">https://www.ebi.ac.uk/chembl/target/inspect/CHEMBL3105</a> ) | Poly [ADP-ribose] polymerase-1         | Show NN            |
| 16   | CHEMBL244 ( <a href="https://www.ebi.ac.uk/chembl/target/inspect/CHEMBL244">https://www.ebi.ac.uk/chembl/target/inspect/CHEMBL244</a> )    | Coagulation factor X                   | Show NN            |
| 17   | CHEMBL259 ( <a href="https://www.ebi.ac.uk/chembl/target/inspect/CHEMBL259">https://www.ebi.ac.uk/chembl/target/inspect/CHEMBL259</a> )    | Melanocortin receptor 4                | Show NN            |
| 18   | CHEMBL4801 ( <a href="https://www.ebi.ac.uk/chembl/target/inspect/CHEMBL4801">https://www.ebi.ac.uk/chembl/target/inspect/CHEMBL4801</a> ) | Caspase-1                              | Show NN            |



|    |                                                                                                                                         |                                                  |         |
|----|-----------------------------------------------------------------------------------------------------------------------------------------|--------------------------------------------------|---------|
| 19 | CHEMBL248 ( <a href="https://www.ebi.ac.uk/chembl/target/inspect/CHEMBL248">https://www.ebi.ac.uk/chembl/target/inspect/CHEMBL248</a> ) | Leukocyte elastase                               | Show NN |
| 20 | CHEMBL235 ( <a href="https://www.ebi.ac.uk/chembl/target/inspect/CHEMBL235">https://www.ebi.ac.uk/chembl/target/inspect/CHEMBL235</a> ) | Peroxisome proliferator-activated receptor gamma | Show NN |
