# Supplementary material for: Accelerating Drug Discovery by Early Protein Drug Target Prediction Based on a Multi-Fingerprint Similarity Search
Source: MDPI journal article supplement (doi:10.3390/molecules24122233), 2019-06-14
Supplement: s1 [file s1]

**MuSSel not predicted**

# SwissTargetPrediction report:

## Reference:

Gfeller D., Michielin O. & Zoete V.  
 Shaping the interaction landscape of  
 bioactive molecules, *Bioinformatics*  
 (2013) 29:3073-3079.

## Query Molecule

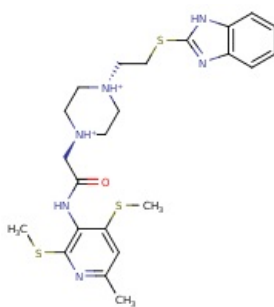

## Frequency of Target Class

| Target                                                                               | Uniprot ID | Gene code | ChEMBL ID     | Probability            | # sim. cmpds (3D / 2D) | Target Class         |
|--------------------------------------------------------------------------------------|------------|-----------|---------------|------------------------|------------------------|----------------------|
| Microtubule-associated protein tau                                                   | P10636     | MAPT      | CHEMBL1293224 | <div><div></div></div> | 1150 / 13              | Unclassified         |
| Muscleblind-like protein 1                                                           | Q9NR56     | MBNL1     | CHEMBL1293317 | <div><div></div></div> | 504 / 10               | Unclassified         |
| Muscleblind-like protein 2 ( <i>by homology</i> )                                    | Q5VZF2     | MBNL2     |               | <div><div></div></div> | 504 / 10               | Unclassified         |
| Muscleblind-like protein 3 ( <i>by homology</i> )                                    | Q9NUK0     | MBNL3     |               | <div><div></div></div> | 504 / 10               | Unclassified         |
| Signal transducer and activator of transcription 3                                   | P40763     | STAT3     | CHEMBL4026    | <div><div></div></div> | 11 / 1                 | Transcription Factor |
| Signal transducer and activator of transcription 1-alpha/beta ( <i>by homology</i> ) | P42224     | STAT1     | CHEMBL6101    | <div><div></div></div> | 11 / 1                 | Unclassified         |
| Signal transducer and activator of transcription 2 ( <i>by homology</i> )            | P52630     | STAT2     |               | <div><div></div></div> | 11 / 1                 | Transcription Factor |
| Signal transducer and activator of transcription 4 ( <i>by homology</i> )            | Q14765     | STAT4     |               | <div><div></div></div> | 11 / 1                 | Transcription Factor |
| Orexin receptor type 1                                                               | O43613     | HCRTR1    | CHEMBL5113    | <div><div></div></div> | 29 / 12                | Membrane receptor    |
| Orexin receptor type 2                                                               | O43614     | HCRTR2    | CHEMBL4792    | <div><div></div></div> | 29 / 12                | Membrane receptor    |
| D(4) dopamine receptor                                                               | P21917     | DRD4      | CHEMBL219     | <div><div></div></div> | 721 / 2                | Membrane receptor    |
| D(2) dopamine receptor                                                               | P14416     | DRD2      | CHEMBL217     | <div><div></div></div> | 1865 / 1               | Membrane receptor    |
| D(3) dopamine receptor                                                               | P35462     | DRD3      | CHEMBL234     | <div><div></div></div> | 1124 / 1               | Membrane receptor    |
| E3 ubiquitin-protein ligase XIAP                                                     | P98170     | XIAP      | CHEMBL4198    | <div><div></div></div> | 212 / 2                | Cytosolic other      |
| Baculoviral IAP repeat-containing protein 3 ( <i>by homology</i> )                   | Q13489     | BIRC3     | CHEMBL5335    | <div><div></div></div> | 213 / 2                | Enzyme               |

# Polypharmacology Browser 2 Prediction:

Targets predicted using NN(ECfp4) + NB(ECfp4).

Save Table

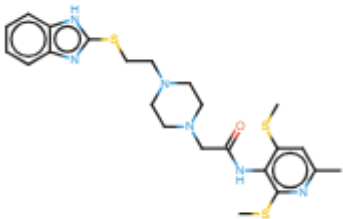

Query molecule

Target class overview

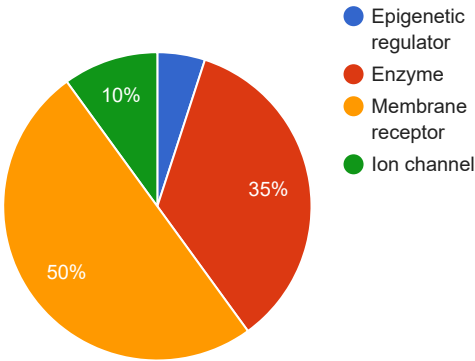

| Rank | ChEMBL ID                                                                                                                                     | Common name                                           | Nearest neighbours      |
|------|-----------------------------------------------------------------------------------------------------------------------------------------------|-------------------------------------------------------|-------------------------|
| 1    | CHEMBL219 ( <a href="https://www.ebi.ac.uk/chembl/target/inspect/CHEMBL219">https://www.ebi.ac.uk/chembl/target/inspect/CHEMBL219</a> )       | Dopamine D4 receptor                                  | <a href="#">Show NN</a> |
| 2    | CHEMBL240 ( <a href="https://www.ebi.ac.uk/chembl/target/inspect/CHEMBL240">https://www.ebi.ac.uk/chembl/target/inspect/CHEMBL240</a> )       | HERG                                                  | <a href="#">Show NN</a> |
| 3    | CHEMBL217 ( <a href="https://www.ebi.ac.uk/chembl/target/inspect/CHEMBL217">https://www.ebi.ac.uk/chembl/target/inspect/CHEMBL217</a> )       | Dopamine D2 receptor                                  | <a href="#">Show NN</a> |
| 4    | CHEMBL273 ( <a href="https://www.ebi.ac.uk/chembl/target/inspect/CHEMBL273">https://www.ebi.ac.uk/chembl/target/inspect/CHEMBL273</a> )       | Serotonin 1a (5-HT1a) receptor                        | <a href="#">Show NN</a> |
| 5    | CHEMBL279 ( <a href="https://www.ebi.ac.uk/chembl/target/inspect/CHEMBL279">https://www.ebi.ac.uk/chembl/target/inspect/CHEMBL279</a> )       | Vascular endothelial growth factor receptor 2         | <a href="#">Show NN</a> |
| 6    | CHEMBL325 ( <a href="https://www.ebi.ac.uk/chembl/target/inspect/CHEMBL325">https://www.ebi.ac.uk/chembl/target/inspect/CHEMBL325</a> )       | Histone deacetylase 1                                 | <a href="#">Show NN</a> |
| 7    | CHEMBL4641<br>( <a href="https://www.ebi.ac.uk/chembl/target/inspect/CHEMBL4641">https://www.ebi.ac.uk/chembl/target/inspect/CHEMBL4641</a> ) | Voltage-gated T-type calcium channel alpha-1G subunit | <a href="#">Show NN</a> |
| 8    | CHEMBL1868<br>( <a href="https://www.ebi.ac.uk/chembl/target/inspect/CHEMBL1868">https://www.ebi.ac.uk/chembl/target/inspect/CHEMBL1868</a> ) | Vascular endothelial growth factor receptor 1         | <a href="#">Show NN</a> |
| 9    | CHEMBL251 ( <a href="https://www.ebi.ac.uk/chembl/target/inspect/CHEMBL251">https://www.ebi.ac.uk/chembl/target/inspect/CHEMBL251</a> )       | Adenosine A2a receptor                                | <a href="#">Show NN</a> |
| 10   | CHEMBL249 ( <a href="https://www.ebi.ac.uk/chembl/target/inspect/CHEMBL249">https://www.ebi.ac.uk/chembl/target/inspect/CHEMBL249</a> )       | Neurokinin 1 receptor                                 | <a href="#">Show NN</a> |
| 11   | CHEMBL234 ( <a href="https://www.ebi.ac.uk/chembl/target/inspect/CHEMBL234">https://www.ebi.ac.uk/chembl/target/inspect/CHEMBL234</a> )       | Dopamine D3 receptor                                  | <a href="#">Show NN</a> |
| 12   | CHEMBL4722<br>( <a href="https://www.ebi.ac.uk/chembl/target/inspect/CHEMBL4722">https://www.ebi.ac.uk/chembl/target/inspect/CHEMBL4722</a> ) | Serine/threonine-protein kinase Aurora-A              | <a href="#">Show NN</a> |
| 13   | CHEMBL2185<br>( <a href="https://www.ebi.ac.uk/chembl/target/inspect/CHEMBL2185">https://www.ebi.ac.uk/chembl/target/inspect/CHEMBL2185</a> ) | Serine/threonine-protein kinase Aurora-B              | <a href="#">Show NN</a> |
| 14   | CHEMBL3371<br>( <a href="https://www.ebi.ac.uk/chembl/target/inspect/CHEMBL3371">https://www.ebi.ac.uk/chembl/target/inspect/CHEMBL3371</a> ) | Serotonin 6 (5-HT6) receptor                          | <a href="#">Show NN</a> |
| 15   | CHEMBL1833<br>( <a href="https://www.ebi.ac.uk/chembl/target/inspect/CHEMBL1833">https://www.ebi.ac.uk/chembl/target/inspect/CHEMBL1833</a> ) | Serotonin 2b (5-HT2b) receptor                        | <a href="#">Show NN</a> |

|    |                                                                                                                                         |                                |         |
|----|-----------------------------------------------------------------------------------------------------------------------------------------|--------------------------------|---------|
| 16 | CHEMBL205 ( <a href="https://www.ebi.ac.uk/chembl/target/inspect/CHEMBL205">https://www.ebi.ac.uk/chembl/target/inspect/CHEMBL205</a> ) | Carbonic anhydrase II          | Show NN |
| 17 | CHEMBL261 ( <a href="https://www.ebi.ac.uk/chembl/target/inspect/CHEMBL261">https://www.ebi.ac.uk/chembl/target/inspect/CHEMBL261</a> ) | Carbonic anhydrase I           | Show NN |
| 18 | CHEMBL214 ( <a href="https://www.ebi.ac.uk/chembl/target/inspect/CHEMBL214">https://www.ebi.ac.uk/chembl/target/inspect/CHEMBL214</a> ) | Serotonin 1a (5-HT1a) receptor | Show NN |
| 19 | CHEMBL233 ( <a href="https://www.ebi.ac.uk/chembl/target/inspect/CHEMBL233">https://www.ebi.ac.uk/chembl/target/inspect/CHEMBL233</a> ) | Mu opioid receptor             | Show NN |
| 20 | CHEMBL340 ( <a href="https://www.ebi.ac.uk/chembl/target/inspect/CHEMBL340">https://www.ebi.ac.uk/chembl/target/inspect/CHEMBL340</a> ) | Cytochrome P450 3A4            | Show NN |
