# Supplementary material for: Accelerating Drug Discovery by Early Protein Drug Target Prediction Based on a Multi-Fingerprint Similarity Search
Source: MDPI journal article supplement (doi:10.3390/molecules24122233), 2019-06-14
Supplement: s1 [file s1]

**MuSSel not predicted**

# SwissTargetPrediction report:

## Reference:

Gfeller D., Michielin O. & Zoete V.  
Shaping the interaction landscape of  
bioactive molecules, *Bioinformatics*  
(2013) 29:3073-3079.

## Query Molecule

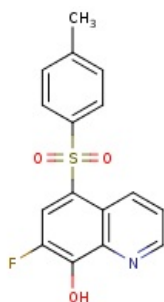

## Frequency of Target Class

| Target                                                                               | Uniprot ID | Gene code | ChEMBL ID     | Probability            | # sim. cmpds (3D / 2D) | Target Class       |
|--------------------------------------------------------------------------------------|------------|-----------|---------------|------------------------|------------------------|--------------------|
| Dual specificity tyrosine-phosphorylation-regulated kinase 1A ( <i>by homology</i> ) | Q13627     | DYRK1A    | CHEMBL2292    | <div><div></div></div> | 90 / 1                 | Ser_Thr_Tyr Kinase |
| Prostaglandin G/H synthase 1 ( <i>by homology</i> )                                  | P23219     | PTGS1     | CHEMBL221     | <div><div></div></div> | 80 / 21                | Enzyme             |
| Prostaglandin G/H synthase 2                                                         | P35354     | PTGS2     | CHEMBL230     | <div><div></div></div> | 80 / 21                | Enzyme             |
| Microtubule-associated protein tau                                                   | P10636     | MAPT      | CHEMBL1293224 | <div><div></div></div> | 710 / 1                | Unclassified       |
| Thymidylate synthase                                                                 | P04818     | TYMS      | CHEMBL1952    | <div><div></div></div> | 49 / 3                 | Enzyme             |
| Tyrosine-protein kinase Fyn ( <i>by homology</i> )                                   | P06241     | FYN       | CHEMBL1841    | <div><div></div></div> | 48 / 4                 | Tyr Kinase         |
| Proto-oncogene tyrosine-protein kinase Src                                           | P12931     | SRC       | CHEMBL267     | <div><div></div></div> | 48 / 4                 | Tyr Kinase         |
| Tyrosine-protein kinase FRK ( <i>by homology</i> )                                   | P42685     | FRK       | CHEMBL4223    | <div><div></div></div> | 48 / 4                 | Tyr Kinase         |
| Tyrosine-protein kinase Yes ( <i>by homology</i> )                                   | P07947     | YES1      | CHEMBL2073    | <div><div></div></div> | 48 / 4                 | Tyr Kinase         |
| Tyrosine-protein kinase Fgr ( <i>by homology</i> )                                   | P09769     | FGR       | CHEMBL4454    | <div><div></div></div> | 48 / 4                 | Tyr Kinase         |
| Poly [ADP-ribose] polymerase 1                                                       | P09874     | PARP1     | CHEMBL3105    | <div><div></div></div> | 50 / 2                 | Enzyme             |
| Tyrosyl-DNA phosphodiesterase 1                                                      | Q9NUW8     | TDP1      | CHEMBL1075138 | <div><div></div></div> | 172 / 1                | Enzyme             |
| PEX                                                                                  | P08253     | MMP2      | CHEMBL333     | <div><div></div></div> | 15 / 1                 | Metallo Protease   |
| 67 kDa matrix metalloproteinase-9 ( <i>by homology</i> )                             | P14780     | MMP9      | CHEMBL321     | <div><div></div></div> | 15 / 1                 | Metallo Protease   |
| FAD-linked sulfhydryl oxidase ALR                                                    | P55789     | GFER      | CHEMBL1741189 | <div><div></div></div> | 87 / 1                 | Enzyme             |

# Polypharmacology Browser 2 Prediction:

Targets predicted using NN(ECfp4) + NB(ECfp4).

Save Table

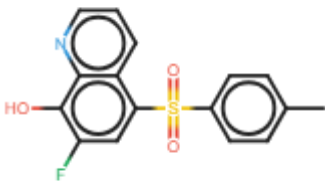

Query molecule

Target class overview

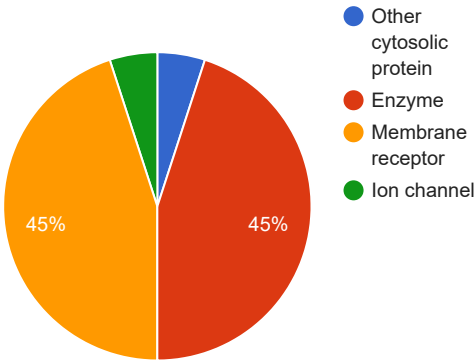

| Rank | ChEMBL ID                                                                                                                                     | Common name                                   | Nearest neighbours |
|------|-----------------------------------------------------------------------------------------------------------------------------------------------|-----------------------------------------------|--------------------|
| 1    | CHEMBL3371<br>( <a href="https://www.ebi.ac.uk/chembl/target/inspect/CHEMBL3371">https://www.ebi.ac.uk/chembl/target/inspect/CHEMBL3371</a> ) | Serotonin 6 (5-HT6) receptor                  | Show NN            |
| 2    | CHEMBL333 ( <a href="https://www.ebi.ac.uk/chembl/target/inspect/CHEMBL333">https://www.ebi.ac.uk/chembl/target/inspect/CHEMBL333</a> )       | Matrix metalloproteinase-2                    | Show NN            |
| 3    | CHEMBL5071<br>( <a href="https://www.ebi.ac.uk/chembl/target/inspect/CHEMBL5071">https://www.ebi.ac.uk/chembl/target/inspect/CHEMBL5071</a> ) | G protein-coupled receptor 44                 | Show NN            |
| 4    | CHEMBL218 ( <a href="https://www.ebi.ac.uk/chembl/target/inspect/CHEMBL218">https://www.ebi.ac.uk/chembl/target/inspect/CHEMBL218</a> )       | Cannabinoid CB1 receptor                      | Show NN            |
| 5    | CHEMBL230 ( <a href="https://www.ebi.ac.uk/chembl/target/inspect/CHEMBL230">https://www.ebi.ac.uk/chembl/target/inspect/CHEMBL230</a> )       | Cyclooxygenase-2                              | Show NN            |
| 6    | CHEMBL205 ( <a href="https://www.ebi.ac.uk/chembl/target/inspect/CHEMBL205">https://www.ebi.ac.uk/chembl/target/inspect/CHEMBL205</a> )       | Carbonic anhydrase II                         | Show NN            |
| 7    | CHEMBL253 ( <a href="https://www.ebi.ac.uk/chembl/target/inspect/CHEMBL253">https://www.ebi.ac.uk/chembl/target/inspect/CHEMBL253</a> )       | Cannabinoid CB2 receptor                      | Show NN            |
| 8    | CHEMBL2564<br>( <a href="https://www.ebi.ac.uk/chembl/target/inspect/CHEMBL2564">https://www.ebi.ac.uk/chembl/target/inspect/CHEMBL2564</a> ) | Metabotropic glutamate receptor 5             | Show NN            |
| 9    | CHEMBL224 ( <a href="https://www.ebi.ac.uk/chembl/target/inspect/CHEMBL224">https://www.ebi.ac.uk/chembl/target/inspect/CHEMBL224</a> )       | Serotonin 2a (5-HT2a) receptor                | Show NN            |
| 10   | CHEMBL225 ( <a href="https://www.ebi.ac.uk/chembl/target/inspect/CHEMBL225">https://www.ebi.ac.uk/chembl/target/inspect/CHEMBL225</a> )       | Serotonin 2c (5-HT2c) receptor                | Show NN            |
| 11   | CHEMBL4235<br>( <a href="https://www.ebi.ac.uk/chembl/target/inspect/CHEMBL4235">https://www.ebi.ac.uk/chembl/target/inspect/CHEMBL4235</a> ) | 11-beta-hydroxysteroid dehydrogenase 1        | Show NN            |
| 12   | CHEMBL279 ( <a href="https://www.ebi.ac.uk/chembl/target/inspect/CHEMBL279">https://www.ebi.ac.uk/chembl/target/inspect/CHEMBL279</a> )       | Vascular endothelial growth factor receptor 2 | Show NN            |
| 13   | CHEMBL240 ( <a href="https://www.ebi.ac.uk/chembl/target/inspect/CHEMBL240">https://www.ebi.ac.uk/chembl/target/inspect/CHEMBL240</a> )       | HERG                                          | Show NN            |
| 14   | CHEMBL254 ( <a href="https://www.ebi.ac.uk/chembl/target/inspect/CHEMBL254">https://www.ebi.ac.uk/chembl/target/inspect/CHEMBL254</a> )       | Phosphodiesterase 4A                          | Show NN            |
| 15   | CHEMBL4005<br>( <a href="https://www.ebi.ac.uk/chembl/target/inspect/CHEMBL4005">https://www.ebi.ac.uk/chembl/target/inspect/CHEMBL4005</a> ) | PI3-kinase p110-alpha subunit                 | Show NN            |

|    |                                                                                                                                               |                                                                |         |
|----|-----------------------------------------------------------------------------------------------------------------------------------------------|----------------------------------------------------------------|---------|
| 16 | CHEMBL1900<br>( <a href="https://www.ebi.ac.uk/chembl/target/inspect/CHEMBL1900">https://www.ebi.ac.uk/chembl/target/inspect/CHEMBL1900</a> ) | Aldose reductase                                               | Show NN |
| 17 | CHEMBL3155<br>( <a href="https://www.ebi.ac.uk/chembl/target/inspect/CHEMBL3155">https://www.ebi.ac.uk/chembl/target/inspect/CHEMBL3155</a> ) | Serotonin 7 (5-HT7) receptor                                   | Show NN |
| 18 | CHEMBL4777<br>( <a href="https://www.ebi.ac.uk/chembl/target/inspect/CHEMBL4777">https://www.ebi.ac.uk/chembl/target/inspect/CHEMBL4777</a> ) | Neuropeptide Y receptor type 1                                 | Show NN |
| 19 | CHEMBL4361<br>( <a href="https://www.ebi.ac.uk/chembl/target/inspect/CHEMBL4361">https://www.ebi.ac.uk/chembl/target/inspect/CHEMBL4361</a> ) | Induced myeloid leukemia cell differentiation protein<br>Mcl-1 | Show NN |
| 20 | CHEMBL3717<br>( <a href="https://www.ebi.ac.uk/chembl/target/inspect/CHEMBL3717">https://www.ebi.ac.uk/chembl/target/inspect/CHEMBL3717</a> ) | Hepatocyte growth factor receptor                              | Show NN |
