# Supplementary material for: Accelerating Drug Discovery by Early Protein Drug Target Prediction Based on a Multi-Fingerprint Similarity Search
Source: MDPI journal article supplement (doi:10.3390/molecules24122233), 2019-06-14
Supplement: s1 [file s1]

## MuSsel Prediction IC<sub>50</sub>:

1 rank

Transient receptor potential cation channel subfamily V member 4 : Homo sapiens

score: 9.515 on ChEMBL3119 based on 12 fingerprints

| Fingerprint type | Ligand        | Tanimoto | Similarity | activity | Valid fg |
|------------------|---------------|----------|------------|----------|----------|
| FeatMFP1         | CHEMBL3218112 |          | 0.863636   | 12.9     | *        |
| MFP1             | CHEMBL3218118 |          | 0.756098   | 3.8      | *        |
| RDKit7           | CHEMBL3218118 |          | 0.764706   | 3.8      | *        |
| Pattern          | CHEMBL3218118 |          | 0.886756   | 3.8      | *        |
| AP_bits          | CHEMBL3218118 |          | 0.621134   | 3.8      | *        |
| TT_bits          | CHEMBL3218118 |          | 0.605634   | 3.8      | *        |
| FP2              | CHEMBL3218118 |          | 0.833333   | 3.8      | *        |
| hybridization    | CHEMBL3218118 |          | 0.720207   | 3.8      | *        |
| substructure     | CHEMBL3218116 |          | 0.894737   | 3.4      | *        |
| graph            | CHEMBL3218118 |          | 0.683258   | 3.8      | *        |
| pubchem          | CHEMBL3218112 |          | 0.918750   | 12.9     | *        |
| cdk_maccs        | CHEMBL3218116 |          | 0.875000   | 3.4      | *        |
| klekota_roth     | CHEMBL3218118 |          | 0.775281   | 3.8      | *        |

\*\*\* ic50 ACTIVITY \*\*\* value prediction

based on 12 locally validated fgps ---> 8.257

["TT\_bits", "substructure", "cdk\_maccs", "Pattern", "FP2", "MFP1", "klekota\_roth", "pubchem", "AP\_bits", "FeatMFP1", "RDKit7", "hybridization"]

2 rank

Transient receptor potential cation channel subfamily M member 8 : Homo sapiens

score: 9.508 on ChEMBL1075319 based on 12 fingerprints

| Fingerprint type | Ligand        | Tanimoto | Similarity | activity | Valid fg |
|------------------|---------------|----------|------------|----------|----------|
| FeatMFP1         | CHEMBL3218114 |          | 0.863636   | 4800.0   | *        |
| MFP1             | CHEMBL3218118 |          | 0.756098   | 9580.0   | *        |
| RDKit7           | CHEMBL3218118 |          | 0.764706   | 9580.0   | *        |
| Pattern          | CHEMBL3218118 |          | 0.886756   | 9580.0   | *        |
| AP_bits          | CHEMBL3218118 |          | 0.621134   | 9580.0   | *        |
| TT_bits          | CHEMBL3218118 |          | 0.605634   | 9580.0   | *        |
| FP2              | CHEMBL3218118 |          | 0.833333   | 9580.0   | *        |
| hybridization    | CHEMBL3218118 |          | 0.720207   | 9580.0   | *        |
| substructure     | CHEMBL3218118 |          | 0.894737   | 9580.0   | *        |
| graph            | CHEMBL3218118 |          | 0.683258   | 9580.0   | *        |
| pubchem          | CHEMBL3218118 |          | 0.911950   | 9580.0   | *        |
| cdk_maccs        | CHEMBL3218118 |          | 0.875000   | 9580.0   | *        |
| klekota_roth     | CHEMBL3218118 |          | 0.775281   | 9580.0   | *        |

\*\*\* ic50 ACTIVITY \*\*\* value prediction

based on 12 locally validated fgps ---> 8262.064

["TT\_bits", "substructure", "cdk\_maccs", "Pattern", "FP2", "MFP1", "klekota\_roth", "pubchem", "AP\_bits", "FeatMFP1", "RDKit7", "hybridization"]

3 rank

HERG : Homo sapiens

score: 9.508 on ChEMBL240 based on 12 fingerprints

| Fingerprint type | Ligand        | Tanimoto | Similarity | activity | Valid fg |
|------------------|---------------|----------|------------|----------|----------|
| FeatMFP1         | CHEMBL3218118 |          | 0.863636   | 9670.0   | *        |
| MFP1             | CHEMBL3218118 |          | 0.756098   | 9670.0   | *        |
| RDKit7           | CHEMBL3218118 |          | 0.764706   | 9670.0   | *        |
| Pattern          | CHEMBL3218118 |          | 0.886756   | 9670.0   | *        |
| AP_bits          | CHEMBL3218118 |          | 0.621134   | 9670.0   | *        |
| TT_bits          | CHEMBL3218118 |          | 0.605634   | 9670.0   | *        |
| FP2              | CHEMBL3218118 |          | 0.833333   | 9670.0   | *        |
| hybridization    | CHEMBL3218118 |          | 0.720207   | 9670.0   | *        |

|              |               |          |        |   |
|--------------|---------------|----------|--------|---|
| substructure | CHEMBL3218118 | 0.894737 | 9670.0 | * |
| graph        | CHEMBL3218118 | 0.683258 | 9670.0 |   |
| pubchem      | CHEMBL3218118 | 0.911950 | 9670.0 | * |
| cdk_maccs    | CHEMBL3218118 | 0.875000 | 9670.0 | * |
| klekota_roth | CHEMBL3218118 | 0.775281 | 9670.0 | * |

\*\*\* ic50 ACTIVITY \*\*\* value prediction  
 based on 12 locally validated fgps ---> 9670.000  
 ["TT\_bits", "substructure", "cdk\_maccs", "Pattern", "FP2", "MFP1",  
 "klekota\_roth", "pubchem", "AP\_bits", "FeatMFP1", "RDKit7",  
 "hybridization"]

4 rank

Transient receptor potential cation channel subfamily V member 4 : Rattus norvegicus

score: 9.508 on ChEMBL2775 based on 12 fingerprints

| Fingerprint type | Ligand        | Tanimoto Similarity | activity | Valid fg |
|------------------|---------------|---------------------|----------|----------|
| FeatMFP1         | CHEMBL3218114 | 0.863636            | 1150.0   | *        |
| MFP1             | CHEMBL3218118 | 0.756098            | 34.1     | *        |
| RDKit7           | CHEMBL3218118 | 0.764706            | 34.1     | *        |
| Pattern          | CHEMBL3218118 | 0.886756            | 34.1     | *        |
| AP_bits          | CHEMBL3218118 | 0.621134            | 34.1     | *        |
| TT_bits          | CHEMBL3218118 | 0.605634            | 34.1     | *        |
| FP2              | CHEMBL3218118 | 0.833333            | 34.1     | *        |
| hybridization    | CHEMBL3218118 | 0.720207            | 34.1     | *        |
| substructure     | CHEMBL3218118 | 0.894737            | 34.1     | *        |
| graph            | CHEMBL3218118 | 0.683258            | 34.1     |          |
| pubchem          | CHEMBL3218118 | 0.911950            | 34.1     | *        |
| cdk_maccs        | CHEMBL3218118 | 0.875000            | 34.1     | *        |
| klekota_roth     | CHEMBL3218118 | 0.775281            | 34.1     | *        |

\*\*\* ic50 ACTIVITY \*\*\* value prediction  
 based on 12 locally validated fgps ---> 341.775  
 ["TT\_bits", "substructure", "cdk\_maccs", "Pattern", "FP2", "MFP1",  
 "klekota\_roth", "pubchem", "AP\_bits", "FeatMFP1", "RDKit7",  
 "hybridization"]

# SwissTargetPrediction report:

## Reference:

Gfeller D., Michielin O. & Zoete V.  
 Shaping the interaction landscape of  
 bioactive molecules, *Bioinformatics*  
 (2013) 29:3073-3079.

## Query Molecule

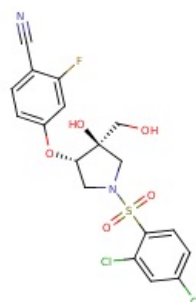

## Frequency of Target Class

| Target                                                             | Uniprot ID | Gene code | ChEMBL ID     | Probability            | # sim. cmpds (3D / 2D) | Target Class         |
|--------------------------------------------------------------------|------------|-----------|---------------|------------------------|------------------------|----------------------|
| 5-hydroxytryptamine receptor 1A                                    | P08908     | HTR1A     | CHEMBL214     | <div><div></div></div> | 26 / 31                | Membrane receptor    |
| 5-hydroxytryptamine receptor 1B<br>(by homology)                   | P28222     | HTR1B     | CHEMBL1898    | <div><div></div></div> | 29 / 32                | Membrane receptor    |
| Potassium voltage-gated channel subfamily H member 2               | Q12809     | KCNH2     | CHEMBL240     | <div><div></div></div> | 23 / 10                | Ion channel          |
| Potassium voltage-gated channel subfamily H member 6 (by homology) | Q9H252     | KCNH6     |               | <div><div></div></div> | 23 / 10                | Ion channel          |
| Potassium voltage-gated channel subfamily H member 7 (by homology) | Q9NS40     | KCNH7     |               | <div><div></div></div> | 23 / 10                | Ion channel          |
| 22 kDa interstitial collagenase (by homology)                      | P03956     | MMP1      | CHEMBL332     | <div><div></div></div> | 135 / 79               | Metallo Protease     |
| Stromelysin-1                                                      | P08254     | MMP3      | CHEMBL283     | <div><div></div></div> | 135 / 79               | Metallo Protease     |
| Macrophage metalloelastase (by homology)                           | P39900     | MMP12     | CHEMBL4393    | <div><div></div></div> | 126 / 79               | Metallo Protease     |
| Collagenase 3                                                      | P45452     | MMP13     | CHEMBL280     | <div><div></div></div> | 126 / 79               | Metallo Protease     |
| Stromelysin-2 (by homology)                                        | P09238     | MMP10     | CHEMBL4270    | <div><div></div></div> | 135 / 79               | Metallo Protease     |
| Matrix metalloproteinase-27 (by homology)                          | Q9H306     | MMP27     |               | <div><div></div></div> | 135 / 79               | Metallo Protease     |
| Androgen receptor                                                  | P10275     | AR        | CHEMBL1871    | <div><div></div></div> | 33 / 1                 | Transcription Factor |
| 5-hydroxytryptamine receptor 7                                     | P34969     | HTR7      | CHEMBL3155    | <div><div></div></div> | 2 / 36                 | Membrane receptor    |
| Microtubule-associated protein tau                                 | P10636     | MAPT      | CHEMBL1293224 | <div><div></div></div> | 105 / 1                | Unclassified         |
| PEX                                                                | P08253     | MMP2      | CHEMBL333     | <div><div></div></div> | 71 / 55                | Metallo Protease     |

**Polypharmacology Browser 2 not predicted**
