# Supplementary material for: Accelerating Drug Discovery by Early Protein Drug Target Prediction Based on a Multi-Fingerprint Similarity Search
Source: MDPI journal article supplement (doi:10.3390/molecules24122233), 2019-06-14
Supplement: s1 [file s1]

## MuSSEL Prediction IC<sub>50</sub>:

1 rank

Heat shock protein HSP 90-alpha : Homo sapiens

score: 4.912 on ChEMBL3880 based on 7 fingerprints

| Fingerprint type | Ligand        | Tanimoto Similarity | activity | Valid fg |
|------------------|---------------|---------------------|----------|----------|
| FeatMFP1         | ChEMBL3653872 | 0.730769            | 1490.0   | *        |
| MFP1             | ChEMBL3656930 | 0.625000            | 340.0    | *        |
| RDKit7           | ChEMBL3653943 | 0.532567            | 290.0    |          |
| Pattern          | ChEMBL2237431 | 0.790155            | 17300.0  |          |
| AP_bits          | ChEMBL3653862 | 0.448363            | 140.0    |          |
| TT_bits          | ChEMBL3653862 | 0.561404            | 140.0    | *        |
| FP2              | ChEMBL3653943 | 0.661157            | 290.0    | *        |
| hybridization    | ChEMBL3653857 | 0.652582            | 270.0    | *        |
| substructure     | ChEMBL3653882 | 0.818182            | 280.0    |          |
| graph            | ChEMBL3653943 | 0.737500            | 290.0    |          |
| pubchem          | ChEMBL3653857 | 0.752688            | 270.0    |          |
| cdk_maccs        | ChEMBL3653855 | 0.836735            | 150.0    | *        |
| klekota_roth     | ChEMBL3653883 | 0.844828            | 120.0    | *        |

\*\*\* ic50 ACTIVITY \*\*\* value prediction

based on 7 locally validated fgps ---> 315.768

["TT\_bits", "klekota\_roth", "MFP1", "FP2", "FeatMFP1", "cdk\_maccs",  
"hybridization"]

# SwissTargetPrediction report:

## Reference:

Gfeller D., Michielin O. & Zoete V.  
 Shaping the interaction landscape of  
 bioactive molecules, *Bioinformatics*  
 (2013) 29:3073-3079.

## Query Molecule

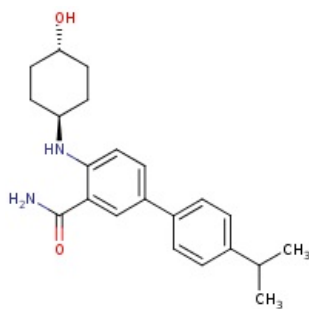

## Frequency of Target Class

| Target                                               | Uniprot ID | Gene code | ChEMBL ID  | Probability            | # sim. cmpds (3D / 2D) | Target Class      |
|------------------------------------------------------|------------|-----------|------------|------------------------|------------------------|-------------------|
| Proteinase-activated receptor 1                      | P25116     | F2R       | CHEMBL3974 | <div><div></div></div> | 17 / 1                 | Membrane receptor |
| Mitogen-activated protein kinase 8<br>(by homology)  | P45983     | MAPK8     | CHEMBL2276 | <div><div></div></div> | 232 / 42               | Ser_Thr Kinase    |
| Mitogen-activated protein kinase 9<br>(by homology)  | P45984     | MAPK9     | CHEMBL4179 | <div><div></div></div> | 232 / 42               | Ser_Thr Kinase    |
| Mitogen-activated protein kinase 10<br>(by homology) | P53779     | MAPK10    | CHEMBL2637 | <div><div></div></div> | 232 / 42               | Ser_Thr Kinase    |
| Mitogen-activated protein kinase 11<br>(by homology) | Q15759     | MAPK11    | CHEMBL3961 | <div><div></div></div> | 240 / 42               | Ser_Thr Kinase    |
| Mitogen-activated protein kinase 14                  | Q16539     | MAPK14    | CHEMBL260  | <div><div></div></div> | 240 / 42               | Ser_Thr Kinase    |
| Cannabinoid receptor 1                               | P21554     | CNR1      | CHEMBL218  | <div><div></div></div> | 331 / 6                | Membrane receptor |
| Cannabinoid receptor 2                               | P34972     | CNR2      | CHEMBL253  | <div><div></div></div> | 202 / 6                | Membrane receptor |
| C-C chemokine receptor type 1                        | P32246     | CCR1      | CHEMBL2413 | <div><div></div></div> | 133 / 9                | Membrane receptor |
| C-C chemokine receptor type 2                        | P41597     | CCR2      | CHEMBL4015 | <div><div></div></div> | 133 / 9                | Membrane receptor |
| C-C chemokine receptor type 3 (by homology)          | P51677     | CCR3      | CHEMBL3473 | <div><div></div></div> | 133 / 9                | Membrane receptor |
| C-C chemokine receptor type 5 (by homology)          | P51681     | CCR5      | CHEMBL274  | <div><div></div></div> | 133 / 9                | Membrane receptor |
| Histamine H3 receptor                                | Q9Y5N1     | HRH3      | CHEMBL264  | <div><div></div></div> | 28 / 4                 | Membrane receptor |
| Mu-type opioid receptor                              | P35372     | OPRM1     | CHEMBL233  | <div><div></div></div> | 105 / 53               | Membrane receptor |
| Delta-type opioid receptor                           | P41143     | OPRD1     | CHEMBL236  | <div><div></div></div> | 105 / 53               | Membrane receptor |

# Polypharmacology Browser 2 Prediction:

Targets predicted using NN(ECfp4) + NB(ECfp4).

Save Table

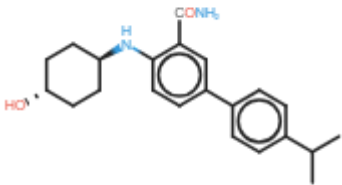

Query molecule

Target class overview

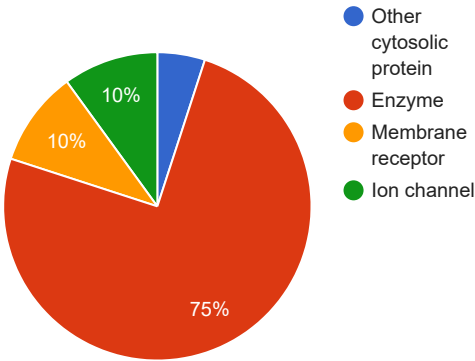

| Rank | ChEMBL ID                                                                                                                                              | Common name                                             | Nearest neighbours |
|------|--------------------------------------------------------------------------------------------------------------------------------------------------------|---------------------------------------------------------|--------------------|
| 1    | CHEMBL3880 ( <a href="https://www.ebi.ac.uk/chembl/target/inspect/CHEMBL3880">https://www.ebi.ac.uk/chembl/target/inspect/CHEMBL3880</a> )             | Heat shock protein HSP 90-alpha                         | Show NN            |
| 2    | CHEMBL2971 ( <a href="https://www.ebi.ac.uk/chembl/target/inspect/CHEMBL2971">https://www.ebi.ac.uk/chembl/target/inspect/CHEMBL2971</a> )             | Tyrosine-protein kinase JAK2                            | Show NN            |
| 3    | CHEMBL2835 ( <a href="https://www.ebi.ac.uk/chembl/target/inspect/CHEMBL2835">https://www.ebi.ac.uk/chembl/target/inspect/CHEMBL2835</a> )             | Tyrosine-protein kinase JAK1                            | Show NN            |
| 4    | CHEMBL2599 ( <a href="https://www.ebi.ac.uk/chembl/target/inspect/CHEMBL2599">https://www.ebi.ac.uk/chembl/target/inspect/CHEMBL2599</a> )             | Tyrosine-protein kinase SYK                             | Show NN            |
| 5    | CHEMBL240 ( <a href="https://www.ebi.ac.uk/chembl/target/inspect/CHEMBL240">https://www.ebi.ac.uk/chembl/target/inspect/CHEMBL240</a> )                | HERG                                                    | Show NN            |
| 6    | CHEMBL4235 ( <a href="https://www.ebi.ac.uk/chembl/target/inspect/CHEMBL4235">https://www.ebi.ac.uk/chembl/target/inspect/CHEMBL4235</a> )             | 11-beta-hydroxysteroid dehydrogenase 1                  | Show NN            |
| 7    | CHEMBL260 ( <a href="https://www.ebi.ac.uk/chembl/target/inspect/CHEMBL260">https://www.ebi.ac.uk/chembl/target/inspect/CHEMBL260</a> )                | MAP kinase p38 alpha                                    | Show NN            |
| 8    | CHEMBL2148 ( <a href="https://www.ebi.ac.uk/chembl/target/inspect/CHEMBL2148">https://www.ebi.ac.uk/chembl/target/inspect/CHEMBL2148</a> )             | Tyrosine-protein kinase JAK3                            | Show NN            |
| 9    | CHEMBL2276 ( <a href="https://www.ebi.ac.uk/chembl/target/inspect/CHEMBL2276">https://www.ebi.ac.uk/chembl/target/inspect/CHEMBL2276</a> )             | c-Jun N-terminal kinase 1                               | Show NN            |
| 10   | CHEMBL1974 ( <a href="https://www.ebi.ac.uk/chembl/target/inspect/CHEMBL1974">https://www.ebi.ac.uk/chembl/target/inspect/CHEMBL1974</a> )             | Tyrosine-protein kinase receptor FLT3                   | Show NN            |
| 11   | CHEMBL4247 ( <a href="https://www.ebi.ac.uk/chembl/target/inspect/CHEMBL4247">https://www.ebi.ac.uk/chembl/target/inspect/CHEMBL4247</a> )             | ALK tyrosine kinase receptor                            | Show NN            |
| 12   | CHEMBL4794 ( <a href="https://www.ebi.ac.uk/chembl/target/inspect/CHEMBL4794">https://www.ebi.ac.uk/chembl/target/inspect/CHEMBL4794</a> )             | Vanilloid receptor                                      | Show NN            |
| 13   | CHEMBL1075104<br>( <a href="https://www.ebi.ac.uk/chembl/target/inspect/CHEMBL1075104">https://www.ebi.ac.uk/chembl/target/inspect/CHEMBL1075104</a> ) | Leucine-rich repeat serine/threonine-protein kinase 2   | Show NN            |
| 14   | CHEMBL284 ( <a href="https://www.ebi.ac.uk/chembl/target/inspect/CHEMBL284">https://www.ebi.ac.uk/chembl/target/inspect/CHEMBL284</a> )                | Dipeptidyl peptidase IV                                 | Show NN            |
| 15   | CHEMBL253 ( <a href="https://www.ebi.ac.uk/chembl/target/inspect/CHEMBL253">https://www.ebi.ac.uk/chembl/target/inspect/CHEMBL253</a> )                | Cannabinoid CB2 receptor                                | Show NN            |
| 16   | CHEMBL1991 ( <a href="https://www.ebi.ac.uk/chembl/target/inspect/CHEMBL1991">https://www.ebi.ac.uk/chembl/target/inspect/CHEMBL1991</a> )             | Inhibitor of nuclear factor kappa B kinase beta subunit | Show NN            |
| 17   | CHEMBL213 ( <a href="https://www.ebi.ac.uk/chembl/target/inspect/CHEMBL213">https://www.ebi.ac.uk/chembl/target/inspect/CHEMBL213</a> )                | Beta-1 adrenergic receptor                              | Show NN            |

|    |                                                                                                                                            |                                        |         |
|----|--------------------------------------------------------------------------------------------------------------------------------------------|----------------------------------------|---------|
| 18 | CHEMBL262 ( <a href="https://www.ebi.ac.uk/chembl/target/inspect/CHEMBL262">https://www.ebi.ac.uk/chembl/target/inspect/CHEMBL262</a> )    | Glycogen synthase kinase-3 beta        | Show NN |
| 19 | CHEMBL2147 ( <a href="https://www.ebi.ac.uk/chembl/target/inspect/CHEMBL2147">https://www.ebi.ac.uk/chembl/target/inspect/CHEMBL2147</a> ) | Serine/threonine-protein kinase PIM1   | Show NN |
| 20 | CHEMBL5314 ( <a href="https://www.ebi.ac.uk/chembl/target/inspect/CHEMBL5314">https://www.ebi.ac.uk/chembl/target/inspect/CHEMBL5314</a> ) | Tyrosine-protein kinase receptor TYRO3 | Show NN |
