# Supplementary material for: Accelerating Drug Discovery by Early Protein Drug Target Prediction Based on a Multi-Fingerprint Similarity Search
Source: MDPI journal article supplement (doi:10.3390/molecules24122233), 2019-06-14
Supplement: s1 [file s1]

**MuSSel not predicted**

# SwissTargetPrediction report:

## Reference:

Gfeller D., Michielin O. & Zoete V.  
 Shaping the interaction landscape of  
 bioactive molecules, *Bioinformatics*  
 (2013) 29:3073-3079.

## Query Molecule

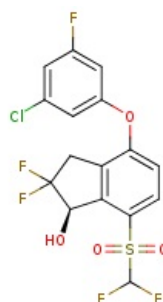

## Frequency of Target Class

| Target                                                                  | Uniprot ID | Gene code | ChEMBL ID     | Probability            | # sim. cmpds (3D / 2D) | Target Class         |
|-------------------------------------------------------------------------|------------|-----------|---------------|------------------------|------------------------|----------------------|
| Peroxisome proliferator-activated receptor gamma ( <i>by homology</i> ) | P37231     | PPARG     | CHEMBL235     | <div><div></div></div> | 0 / 16                 | Transcription Factor |
| Peroxisome proliferator-activated receptor delta                        | Q03181     | PPARD     | CHEMBL3979    | <div><div></div></div> | 0 / 16                 | Transcription Factor |
| Peroxisome proliferator-activated receptor alpha                        | Q07869     | PPARA     | CHEMBL239     | <div><div></div></div> | 0 / 16                 | Transcription Factor |
| Microtubule-associated protein tau                                      | P10636     | MAPT      | CHEMBL1293224 | <div><div></div></div> | 2 / 0                  | Unclassified         |
| Tyrosine-protein phosphatase non-receptor type 1                        | P18031     | PTPN1     | CHEMBL335     | <div><div></div></div> | 1 / 0                  | Tyr Phosphatase      |
| Tyrosine-protein phosphatase non-receptor type 2 ( <i>by homology</i> ) | P17706     | PTPN2     | CHEMBL3807    | <div><div></div></div> | 1 / 0                  | Tyr Phosphatase      |
| Adenosine receptor A1                                                   | P30542     | ADORA1    | CHEMBL226     | <div><div></div></div> | 1 / 0                  | Membrane receptor    |
| Adenosine receptor A2a ( <i>by homology</i> )                           | P29274     | ADORA2A   | CHEMBL251     | <div><div></div></div> | 1 / 0                  | Membrane receptor    |
| Adenosine receptor A2b ( <i>by homology</i> )                           | P29275     | ADORA2B   | CHEMBL255     | <div><div></div></div> | 1 / 0                  | Membrane receptor    |
| Sodium channel protein type 9 subunit alpha                             | Q15858     | SCN9A     | CHEMBL4296    | <div><div></div></div> | 1 / 0                  | Ion channel          |
| Sodium channel protein type 1 subunit alpha ( <i>by homology</i> )      | P35498     | SCN1A     | CHEMBL1845    | <div><div></div></div> | 1 / 0                  | Ion channel          |
| Sodium channel protein type 2 subunit alpha ( <i>by homology</i> )      | Q99250     | SCN2A     | CHEMBL4187    | <div><div></div></div> | 1 / 0                  | Ion channel          |
| Sodium channel protein type 3 subunit alpha ( <i>by homology</i> )      | Q9NY46     | SCN3A     | CHEMBL5163    | <div><div></div></div> | 1 / 0                  | Ion channel          |
| Sodium channel protein type 8 subunit alpha ( <i>by homology</i> )      | Q9UQD0     | SCN8A     | CHEMBL5202    | <div><div></div></div> | 1 / 0                  | Ion channel          |
| Sodium-dependent noradrenaline transporter                              | P23975     | SLC6A2    | CHEMBL222     | <div><div></div></div> | 1 / 0                  | Transporter          |

# Polypharmacology Browser 2 Prediction:

Targets predicted using NN(ECfp4) + NB(ECfp4).

Save Table

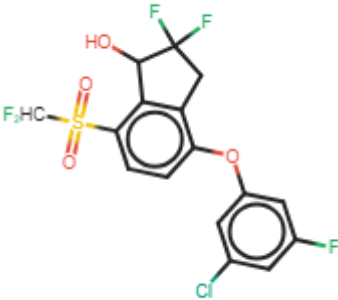

Query molecule

Target class overview

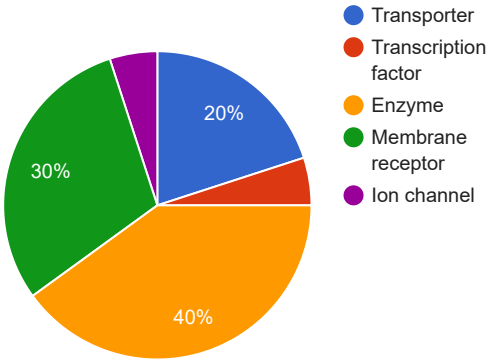

| Rank | ChEMBL ID                                                                                                                                  | Common name                       | Nearest neighbours |
|------|--------------------------------------------------------------------------------------------------------------------------------------------|-----------------------------------|--------------------|
| 1    | CHEMBL205 ( <a href="https://www.ebi.ac.uk/chembl/target/inspect/CHEMBL205">https://www.ebi.ac.uk/chembl/target/inspect/CHEMBL205</a> )    | Carbonic anhydrase II             | Show NN            |
| 2    | CHEMBL3371 ( <a href="https://www.ebi.ac.uk/chembl/target/inspect/CHEMBL3371">https://www.ebi.ac.uk/chembl/target/inspect/CHEMBL3371</a> ) | Serotonin 6 (5-HT6) receptor      | Show NN            |
| 3    | CHEMBL228 ( <a href="https://www.ebi.ac.uk/chembl/target/inspect/CHEMBL228">https://www.ebi.ac.uk/chembl/target/inspect/CHEMBL228</a> )    | Serotonin transporter             | Show NN            |
| 4    | CHEMBL261 ( <a href="https://www.ebi.ac.uk/chembl/target/inspect/CHEMBL261">https://www.ebi.ac.uk/chembl/target/inspect/CHEMBL261</a> )    | Carbonic anhydrase I              | Show NN            |
| 5    | CHEMBL313 ( <a href="https://www.ebi.ac.uk/chembl/target/inspect/CHEMBL313">https://www.ebi.ac.uk/chembl/target/inspect/CHEMBL313</a> )    | Serotonin transporter             | Show NN            |
| 6    | CHEMBL240 ( <a href="https://www.ebi.ac.uk/chembl/target/inspect/CHEMBL240">https://www.ebi.ac.uk/chembl/target/inspect/CHEMBL240</a> )    | HERG                              | Show NN            |
| 7    | CHEMBL222 ( <a href="https://www.ebi.ac.uk/chembl/target/inspect/CHEMBL222">https://www.ebi.ac.uk/chembl/target/inspect/CHEMBL222</a> )    | Norepinephrine transporter        | Show NN            |
| 8    | CHEMBL340 ( <a href="https://www.ebi.ac.uk/chembl/target/inspect/CHEMBL340">https://www.ebi.ac.uk/chembl/target/inspect/CHEMBL340</a> )    | Cytochrome P450 3A4               | Show NN            |
| 9    | CHEMBL238 ( <a href="https://www.ebi.ac.uk/chembl/target/inspect/CHEMBL238">https://www.ebi.ac.uk/chembl/target/inspect/CHEMBL238</a> )    | Dopamine transporter              | Show NN            |
| 10   | CHEMBL230 ( <a href="https://www.ebi.ac.uk/chembl/target/inspect/CHEMBL230">https://www.ebi.ac.uk/chembl/target/inspect/CHEMBL230</a> )    | Cyclooxygenase-2                  | Show NN            |
| 11   | CHEMBL5071 ( <a href="https://www.ebi.ac.uk/chembl/target/inspect/CHEMBL5071">https://www.ebi.ac.uk/chembl/target/inspect/CHEMBL5071</a> ) | G protein-coupled receptor 44     | Show NN            |
| 12   | CHEMBL224 ( <a href="https://www.ebi.ac.uk/chembl/target/inspect/CHEMBL224">https://www.ebi.ac.uk/chembl/target/inspect/CHEMBL224</a> )    | Serotonin 2a (5-HT2a) receptor    | Show NN            |
| 13   | CHEMBL1871 ( <a href="https://www.ebi.ac.uk/chembl/target/inspect/CHEMBL1871">https://www.ebi.ac.uk/chembl/target/inspect/CHEMBL1871</a> ) | Androgen Receptor                 | Show NN            |
| 14   | CHEMBL2564 ( <a href="https://www.ebi.ac.uk/chembl/target/inspect/CHEMBL2564">https://www.ebi.ac.uk/chembl/target/inspect/CHEMBL2564</a> ) | Metabotropic glutamate receptor 5 | Show NN            |
| 15   | CHEMBL3594 ( <a href="https://www.ebi.ac.uk/chembl/target/inspect/CHEMBL3594">https://www.ebi.ac.uk/chembl/target/inspect/CHEMBL3594</a> ) | Carbonic anhydrase IX             | Show NN            |
| 16   | CHEMBL2069 ( <a href="https://www.ebi.ac.uk/chembl/target/inspect/CHEMBL2069">https://www.ebi.ac.uk/chembl/target/inspect/CHEMBL2069</a> ) | Thromboxane A2 receptor           | Show NN            |
| 17   | CHEMBL280 ( <a href="https://www.ebi.ac.uk/chembl/target/inspect/CHEMBL280">https://www.ebi.ac.uk/chembl/target/inspect/CHEMBL280</a> )    | Matrix metalloproteinase 13       | Show NN            |
| 18   | CHEMBL253 ( <a href="https://www.ebi.ac.uk/chembl/target/inspect/CHEMBL253">https://www.ebi.ac.uk/chembl/target/inspect/CHEMBL253</a> )    | Cannabinoid CB2 receptor          | Show NN            |

|    |                                                                                                                                            |                  |         |
|----|--------------------------------------------------------------------------------------------------------------------------------------------|------------------|---------|
| 19 | CHEMBL221 ( <a href="https://www.ebi.ac.uk/chembl/target/inspect/CHEMBL221">https://www.ebi.ac.uk/chembl/target/inspect/CHEMBL221</a> )    | Cyclooxygenase-1 | Show NN |
| 20 | CHEMBL4068 ( <a href="https://www.ebi.ac.uk/chembl/target/inspect/CHEMBL4068">https://www.ebi.ac.uk/chembl/target/inspect/CHEMBL4068</a> ) | Chymase          | Show NN |
