# Supplementary material for: Accelerating Drug Discovery by Early Protein Drug Target Prediction Based on a Multi-Fingerprint Similarity Search
Source: MDPI journal article supplement (doi:10.3390/molecules24122233), 2019-06-14
Supplement: s1 [file s1]

**MuSSel not predicted**

# SwissTargetPrediction report:

## Reference:

Gfeller D., Michielin O. & Zoete V.  
Shaping the interaction landscape of  
bioactive molecules, *Bioinformatics*  
(2013) 29:3073-3079.

## Query Molecule

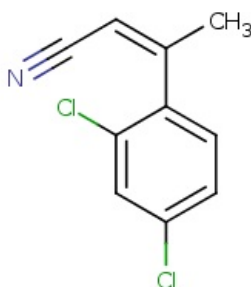

## Frequency of Target Class

| Target                                                                                               | Uniprot ID | Gene code | ChEMBL ID     | Probability            | # sim. cmpds (3D / 2D) | Target Class      |
|------------------------------------------------------------------------------------------------------|------------|-----------|---------------|------------------------|------------------------|-------------------|
| Sodium-dependent noradrenaline transporter ( <i>by homology</i> )                                    | P23975     | SLC6A2    | CHEMBL222     | <div><div></div></div> | 2 / 2                  | Transporter       |
| Sodium-dependent dopamine transporter                                                                | Q01959     | SLC6A3    | CHEMBL238     | <div><div></div></div> | 2 / 2                  | Transporter       |
| Sodium-dependent serotonin transporter                                                               | P31645     | SLC6A4    | CHEMBL228     | <div><div></div></div> | 2 / 1                  | Transporter       |
| Sodium- and chloride-dependent glycine transporter 1 ( <i>by homology</i> )                          | P48067     | SLC6A9    | CHEMBL2337    | <div><div></div></div> | 2 / 1                  | Transporter       |
| Sodium-dependent proline transporter ( <i>by homology</i> )                                          | Q99884     | SLC6A7    |               | <div><div></div></div> | 2 / 1                  | Transporter       |
| Sodium- and chloride-dependent neutral and basic amino acid transporter B(0+) ( <i>by homology</i> ) | Q9UN76     | SLC6A14   |               | <div><div></div></div> | 2 / 1                  | Transporter       |
| Sodium- and chloride-dependent glycine transporter 2 ( <i>by homology</i> )                          | Q9Y345     | SLC6A5    | CHEMBL3060    | <div><div></div></div> | 2 / 1                  | Transporter       |
| Alpha-2A adrenergic receptor                                                                         | P08913     | ADRA2A    | CHEMBL1867    | <div><div></div></div> | 1 / 1                  | Membrane receptor |
| Alpha-2C adrenergic receptor                                                                         | P18825     | ADRA2C    | CHEMBL1916    | <div><div></div></div> | 1 / 1                  | Membrane receptor |
| Adenosine receptor A3                                                                                | P33765     | ADORA3    | CHEMBL256     | <div><div></div></div> | 1 / 1                  | Membrane receptor |
| Alpha-2B adrenergic receptor ( <i>by homology</i> )                                                  | P18089     | ADRA2B    | CHEMBL1942    | <div><div></div></div> | 1 / 1                  | Membrane receptor |
| Amine oxidase [flavin-containing] A                                                                  | P21397     | MAOA      | CHEMBL1951    | <div><div></div></div> | 2 / 2                  | Enzyme            |
| Amine oxidase [flavin-containing] B                                                                  | P27338     | MAOB      | CHEMBL2039    | <div><div></div></div> | 2 / 2                  | Enzyme            |
| Microtubule-associated protein tau                                                                   | P10636     | MAPT      | CHEMBL1293224 | <div><div></div></div> | 5 / 2                  | Unclassified      |
| Indoleamine 2,3-dioxygenase 1                                                                        | P14902     | IDO1      | CHEMBL4685    | <div><div></div></div> | 7 / 0                  | Enzyme            |

**Polypharmacology Browser 2 not predicted**
