# Supplementary material for: Accelerating Drug Discovery by Early Protein Drug Target Prediction Based on a Multi-Fingerprint Similarity Search
Source: MDPI journal article supplement (doi:10.3390/molecules24122233), 2019-06-14
Supplement: s1 [file s1]

**MuSSel not predicted**

# SwissTargetPrediction report:

## Reference:

Gfeller D., Michielin O. & Zoete V.  
 Shaping the interaction landscape of  
 bioactive molecules, *Bioinformatics*  
 (2013) 29:3073-3079.

## Query Molecule

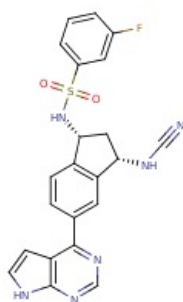

## Frequency of Target Class

| Target                                                             | Uniprot ID | Gene code | ChEMBL ID  | Probability            | # sim. cmpds (3D / 2D) | Target Class      |
|--------------------------------------------------------------------|------------|-----------|------------|------------------------|------------------------|-------------------|
| B1 bradykinin receptor                                             | P46663     | BDKRB1    | CHEMBL4308 | <div><div></div></div> | 68 / 6                 | Membrane receptor |
| Inhibitor of nuclear factor kappa-B kinase subunit beta            | O14920     | IKBKB     | CHEMBL1991 | <div><div></div></div> | 138 / 11               | Ser_Thr Kinase    |
| Inhibitor of nuclear factor kappa-B kinase subunit alpha           | O15111     | CHUK      | CHEMBL3476 | <div><div></div></div> | 138 / 11               | Ser_Thr Kinase    |
| Adenosine receptor A3                                              | P33765     | ADORA3    | CHEMBL256  | <div><div></div></div> | 285 / 14               | Membrane receptor |
| Adenosine receptor A2a                                             | P29274     | ADORA2A   | CHEMBL251  | <div><div></div></div> | 498 / 23               | Membrane receptor |
| Adenosine receptor A2b                                             | P29275     | ADORA2B   | CHEMBL255  | <div><div></div></div> | 439 / 23               | Membrane receptor |
| Adenosine receptor A1                                              | P30542     | ADORA1    | CHEMBL226  | <div><div></div></div> | 615 / 25               | Membrane receptor |
| Potassium voltage-gated channel subfamily H member 2               | Q12809     | KCNH2     | CHEMBL240  | <div><div></div></div> | 162 / 1                | Ion channel       |
| Potassium voltage-gated channel subfamily H member 6 (by homology) | Q9H252     | KCNH6     |            | <div><div></div></div> | 162 / 1                | Ion channel       |
| Potassium voltage-gated channel subfamily H member 7 (by homology) | Q9NS40     | KCNH7     |            | <div><div></div></div> | 162 / 1                | Ion channel       |
| 5-hydroxytryptamine receptor 2A (by homology)                      | P28223     | HTR2A     | CHEMBL224  | <div><div></div></div> | 270 / 1                | Membrane receptor |
| Activation peptide fragment 1                                      | P00734     | F2        | CHEMBL204  | <div><div></div></div> | 203 / 5                | Serine Protease   |
| Factor X light chain                                               | P00742     | F10       | CHEMBL244  | <div><div></div></div> | 355 / 11               | Serine Protease   |
| Coagulation factor VII (by homology)                               | P08709     | F7        | CHEMBL3991 | <div><div></div></div> | 352 / 11               | Serine Protease   |
| Coagulation factor IXa heavy chain (by homology)                   | P00740     | F9        | CHEMBL2016 | <div><div></div></div> | 355 / 11               | Serine Protease   |

**Polypharmacology Browser 2 not predicted**
