# Supplementary material for: Accelerating Drug Discovery by Early Protein Drug Target Prediction Based on a Multi-Fingerprint Similarity Search
Source: MDPI journal article supplement (doi:10.3390/molecules24122233), 2019-06-14
Supplement: s1 [file s1]

**MuSSel not predicted**

# SwissTargetPrediction report:

## Reference:

Gfeller D., Michielin O. & Zoete V.  
Shaping the interaction landscape of  
bioactive molecules, *Bioinformatics*  
(2013) 29:3073-3079.

## Query Molecule

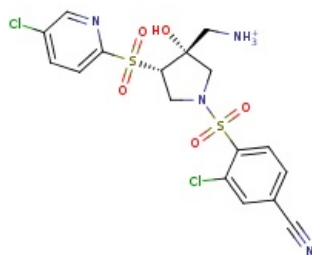

## Frequency of Target Class

| Target                                                                   | Uniprot ID | Gene code | ChEMBL ID     | Probability            | # sim. cmpds (3D / 2D) | Target Class       |
|--------------------------------------------------------------------------|------------|-----------|---------------|------------------------|------------------------|--------------------|
| Microtubule-associated protein tau                                       | P10636     | MAPT      | CHEMBL1293224 | <div><div></div></div> | 201 / 2                | Unclassified       |
| Coagulation factor IXa heavy chain<br>(by homology)                      | P00740     | F9        | CHEMBL2016    | <div><div></div></div> | 34 / 1                 | Serine Protease    |
| Factor X light chain                                                     | P00742     | F10       | CHEMBL244     | <div><div></div></div> | 34 / 1                 | Serine Protease    |
| Coagulation factor VII (by homology)                                     | P08709     | F7        | CHEMBL3991    | <div><div></div></div> | 34 / 1                 | Serine Protease    |
| Methionine aminopeptidase 2                                              | P50579     | METAP2    | CHEMBL3922    | <div><div></div></div> | 82 / 0                 | Metallo Protease   |
| Dual specificity mitogen-activated protein kinase kinase 2 (by homology) | P36507     | MAP2K2    | CHEMBL2964    | <div><div></div></div> | 102 / 0                | Ser_Thr_Tyr Kinase |
| Dual specificity mitogen-activated protein kinase kinase 1               | Q02750     | MAP2K1    | CHEMBL3587    | <div><div></div></div> | 102 / 0                | Ser_Thr_Tyr Kinase |
| Dual specificity mitogen-activated protein kinase kinase 5 (by homology) | Q13163     | MAP2K5    | CHEMBL4948    | <div><div></div></div> | 104 / 0                | Ser_Thr_Tyr Kinase |
| Vascular endothelial growth factor receptor 1 (by homology)              | P17948     | FLT1      | CHEMBL1868    | <div><div></div></div> | 114 / 0                | Tyr Kinase         |
| Vascular endothelial growth factor receptor 3 (by homology)              | P35916     | FLT4      | CHEMBL1955    | <div><div></div></div> | 114 / 0                | Tyr Kinase         |
| Vascular endothelial growth factor receptor 2                            | P35968     | KDR       | CHEMBL279     | <div><div></div></div> | 114 / 0                | Tyr Kinase         |
| Methionine aminopeptidase 1                                              | P53582     | METAP1    | CHEMBL2474    | <div><div></div></div> | 15 / 0                 | Metallo Protease   |
| Methionine aminopeptidase 1D, mitochondrial (by homology)                | Q6UB28     | METAP1D   |               | <div><div></div></div> | 15 / 0                 | Metallo Protease   |
| Beta-2 adrenergic receptor (by homology)                                 | P07550     | ADRB2     | CHEMBL210     | <div><div></div></div> | 66 / 0                 | Membrane receptor  |
| Beta-1 adrenergic receptor                                               | P08588     | ADRB1     | CHEMBL213     | <div><div></div></div> | 61 / 0                 | Membrane receptor  |

**Polypharmacology Browser 2 not predicted**
