# Supplementary material for: Accelerating Drug Discovery by Early Protein Drug Target Prediction Based on a Multi-Fingerprint Similarity Search
Source: MDPI journal article supplement (doi:10.3390/molecules24122233), 2019-06-14
Supplement: s1 [file s1]

## MuSSEL Prediction IC<sub>50</sub>:

1 rank

HERG : Homo sapiens

score: 5.867 on ChEMBL240 based on 8 fingerprints

| Fingerprint type | Ligand        | Tanimoto Similarity | activity | Valid fg |
|------------------|---------------|---------------------|----------|----------|
| FeatMFP1         | ChEMBL549438  | 0.740741            | 50118.72 | *        |
| MFP1             | ChEMBL2069398 | 0.564103            | 6000.00  | *        |
| RDKit7           | ChEMBL2041188 | 0.511613            | 23000.00 |          |
| Pattern          | ChEMBL258176  | 0.877510            | 25118.86 | *        |
| AP_bits          | ChEMBL2043004 | 0.512195            | 220.00   | *        |
| TT_bits          | ChEMBL575475  | 0.363636            | 2658.23  |          |
| FP2              | ChEMBL2041188 | 0.537736            | 23000.00 |          |
| hybridization    | ChEMBL100566  | 0.471223            | 8200.00  |          |
| substructure     | ChEMBL214983  | 0.875000            | 4000.00  | *        |
| graph            | ChEMBL485161  | 0.672515            | 50000.00 |          |
| pubchem          | ChEMBL2325987 | 0.846995            | 26957.00 | *        |
| cdk_maccs        | ChEMBL214983  | 0.842105            | 4000.00  | *        |
| klekota_roth     | ChEMBL552023  | 0.608696            | 3100.00  | *        |

\*\*\* ic50 ACTIVITY \*\*\* value prediction

based on 8 locally validated fgps ---> 14170.092

["substructure", "Pattern", "MFP1", "pubchem", "AP\_bits", "FeatMFP1",  
"klekota\_roth", "cdk\_maccs"]

## MuSSEL Prediction k<sub>i</sub>:

1 rank

Orexin receptor 2 : Homo sapiens

score: 3.177 on ChEMBL4792 based on 4 fingerprints

| Fingerprint type | Ligand        | Tanimoto | Similarity | activity | Valid fg |
|------------------|---------------|----------|------------|----------|----------|
| FeatMFP1         | ChEMBL3646199 |          | 0.730769   | 716.00   |          |
| MFP1             | ChEMBL3646199 |          | 0.564103   | 716.00   |          |
| RDKit7           | ChEMBL3670574 |          | 0.494475   | 72.00    |          |
| Pattern          | ChEMBL3099889 |          | 0.874747   | 4.80     | *        |
| AP_bits          | ChEMBL3669443 |          | 0.567929   | 35.00    | *        |
| TT_bits          | ChEMBL3670618 |          | 0.316327   | 28.00    |          |
| FP2              | ChEMBL3670574 |          | 0.571429   | 72.00    |          |
| hybridization    | ChEMBL3670574 |          | 0.522772   | 72.00    |          |
| substructure     | ChEMBL2435413 |          | 0.800000   | 12.88    |          |
| graph            | ChEMBL3663562 |          | 0.660606   | 934.00   |          |
| pubchem          | ChEMBL2435401 |          | 0.897727   | 20.89    | *        |
| cdk_maccs        | ChEMBL3646199 |          | 0.836364   | 716.00   | *        |
| klekota_roth     | ChEMBL1083358 |          | 0.500000   | 0.17     |          |

\*\*\* ki ACTIVITY \*\*\* value prediction

based on 4 locally validated fgps ---> 219.194

["Pattern", "cdk\_maccs", "pubchem", "AP\_bits"]

2 rank

Orexin receptor 1 : Homo sapiens

score: 3.177 on ChEMBL5113 based on 4 fingerprints

| Fingerprint type | Ligand        | Tanimoto | Similarity | activity | Valid fg |
|------------------|---------------|----------|------------|----------|----------|
| FeatMFP1         | ChEMBL3646199 |          | 0.730769   | 10000.00 |          |
| MFP1             | ChEMBL3646199 |          | 0.564103   | 10000.00 |          |
| RDKit7           | ChEMBL3670574 |          | 0.494475   | 3841.00  |          |
| Pattern          | ChEMBL3099889 |          | 0.874747   | 833.00   | *        |
| AP_bits          | ChEMBL3669443 |          | 0.567929   | 365.00   | *        |
| TT_bits          | ChEMBL3670618 |          | 0.316327   | 143.00   |          |
| FP2              | ChEMBL3670574 |          | 0.571429   | 3841.00  |          |
| hybridization    | ChEMBL3670574 |          | 0.522772   | 3841.00  |          |
| substructure     | ChEMBL2435413 |          | 0.800000   | 58.88    |          |
| graph            | ChEMBL3663562 |          | 0.660606   | 77.00    |          |
| pubchem          | ChEMBL2435401 |          | 0.897727   | 1445.44  | *        |
| cdk_maccs        | ChEMBL3646199 |          | 0.836364   | 10000.00 | *        |
| klekota_roth     | ChEMBL1083358 |          | 0.500000   | 1.80     |          |

\*\*\* ki ACTIVITY \*\*\* value prediction

based on 4 locally validated fgps ---> 3000.118

["Pattern", "cdk\_maccs", "pubchem", "AP\_bits"]

# SwissTargetPrediction report:

## Reference:

Gfeller D., Michielin O. & Zoete V.  
Shaping the interaction landscape of  
bioactive molecules, *Bioinformatics*  
(2013) 29:3073-3079.

## Query Molecule

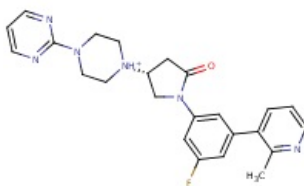

## Frequency of Target Class

| Target                                                                 | Uniprot ID | Gene code | ChEMBL ID  | Probability            | # sim. cmpds (3D / 2D) | Target Class      |
|------------------------------------------------------------------------|------------|-----------|------------|------------------------|------------------------|-------------------|
| cGMP-specific 3',5'-cyclic phosphodiesterase                           | O76074     | PDE5A     | CHEMBL1827 | <div><div></div></div> | 143 / 2                | Enzyme            |
| Dual 3',5'-cyclic-AMP and -GMP phosphodiesterase 11A                   | Q9HCR9     | PDE11A    | CHEMBL2717 | <div><div></div></div> | 125 / 2                | Enzyme            |
| D(2) dopamine receptor                                                 | P14416     | DRD2      | CHEMBL217  | <div><div></div></div> | 2174 / 33              | Membrane receptor |
| Dipeptidyl peptidase 4 membrane form                                   | P27487     | DPP4      | CHEMBL284  | <div><div></div></div> | 592 / 22               | Serine Protease   |
| Seprase ( <i>by homology</i> )                                         | Q12884     | FAP       | CHEMBL4683 | <div><div></div></div> | 592 / 22               | Serine Protease   |
| D(4) dopamine receptor                                                 | P21917     | DRD4      | CHEMBL219  | <div><div></div></div> | 685 / 11               | Membrane receptor |
| D(3) dopamine receptor                                                 | P35462     | DRD3      | CHEMBL234  | <div><div></div></div> | 1132 / 15              | Membrane receptor |
| Alpha-1D adrenergic receptor                                           | P25100     | ADRA1D    | CHEMBL223  | <div><div></div></div> | 426 / 7                | Membrane receptor |
| Alpha-1A adrenergic receptor                                           | P35348     | ADRA1A    | CHEMBL229  | <div><div></div></div> | 487 / 16               | Membrane receptor |
| Alpha-1B adrenergic receptor                                           | P35368     | ADRA1B    | CHEMBL232  | <div><div></div></div> | 426 / 7                | Membrane receptor |
| Neuronal acetylcholine receptor subunit alpha-7 ( <i>by homology</i> ) | P36544     | CHRNA7    | CHEMBL2492 | <div><div></div></div> | 141 / 24               | Ion channel       |
| CHRNA7-FAM7A fusion protein ( <i>by homology</i> )                     | Q494W8     | CHRFAM7A  |            | <div><div></div></div> | 141 / 24               | Ion channel       |
| Egl nine homolog 2                                                     | Q96KS0     | EGLN2     | CHEMBL3028 | <div><div></div></div> | 10 / 35                | Enzyme            |
| Egl nine homolog 1                                                     | Q9GZT9     | EGLN1     | CHEMBL5697 | <div><div></div></div> | 10 / 35                | Enzyme            |
| Potassium voltage-gated channel subfamily H member 2                   | Q12809     | KCNH2     | CHEMBL240  | <div><div></div></div> | 518 / 34               | Ion channel       |

## Polypharmacology Browser 2 Prediction:

## Targets predicted using NN(ECfp4) + NB(ECfp4).

### Save Table

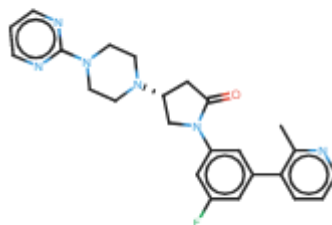

Query molecule

## Target class overview

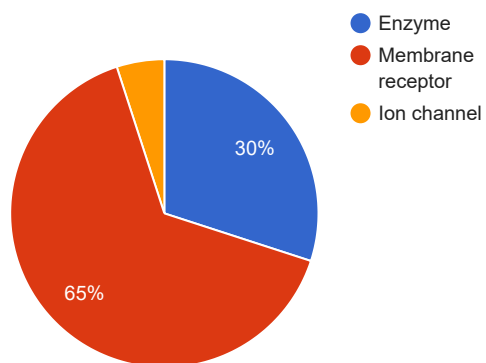

| Rank | ChEMBL ID                                                                                                                                | Common name                                   | Nearest neighbours |
|------|------------------------------------------------------------------------------------------------------------------------------------------|-----------------------------------------------|--------------------|
| 1    | <a href="https://www.ebi.ac.uk/chembl/target/inspect/CHEMBL284">CHEMBL284</a> (https://www.ebi.ac.uk/chembl/target/inspect/CHEMBL284)    | Dipeptidyl peptidase IV                       | Show NN            |
| 2    | <a href="https://www.ebi.ac.uk/chembl/target/inspect/CHEMBL3227">CHEMBL3227</a> (https://www.ebi.ac.uk/chembl/target/inspect/CHEMBL3227) | Metabotropic glutamate receptor 5             | Show NN            |
| 3    | <a href="https://www.ebi.ac.uk/chembl/target/inspect/CHEMBL4005">CHEMBL4005</a> (https://www.ebi.ac.uk/chembl/target/inspect/CHEMBL4005) | PI3-kinase p110-alpha subunit                 | Show NN            |
| 4    | <a href="https://www.ebi.ac.uk/chembl/target/inspect/CHEMBL217">CHEMBL217</a> (https://www.ebi.ac.uk/chembl/target/inspect/CHEMBL217)    | Dopamine D2 receptor                          | Show NN            |
| 5    | <a href="https://www.ebi.ac.uk/chembl/target/inspect/CHEMBL234">CHEMBL234</a> (https://www.ebi.ac.uk/chembl/target/inspect/CHEMBL234)    | Dopamine D3 receptor                          | Show NN            |
| 6    | <a href="https://www.ebi.ac.uk/chembl/target/inspect/CHEMBL2842">CHEMBL2842</a> (https://www.ebi.ac.uk/chembl/target/inspect/CHEMBL2842) | Serine/threonine-protein kinase mTOR          | Show NN            |
| 7    | <a href="https://www.ebi.ac.uk/chembl/target/inspect/CHEMBL240">CHEMBL240</a> (https://www.ebi.ac.uk/chembl/target/inspect/CHEMBL240)    | HERG                                          | Show NN            |
| 8    | <a href="https://www.ebi.ac.uk/chembl/target/inspect/CHEMBL224">CHEMBL224</a> (https://www.ebi.ac.uk/chembl/target/inspect/CHEMBL224)    | Serotonin 2a (5-HT2a) receptor                | Show NN            |
| 9    | <a href="https://www.ebi.ac.uk/chembl/target/inspect/CHEMBL4409">CHEMBL4409</a> (https://www.ebi.ac.uk/chembl/target/inspect/CHEMBL4409) | Phosphodiesterase 10A                         | Show NN            |
| 10   | <a href="https://www.ebi.ac.uk/chembl/target/inspect/CHEMBL214">CHEMBL214</a> (https://www.ebi.ac.uk/chembl/target/inspect/CHEMBL214)    | Serotonin 1a (5-HT1a) receptor                | Show NN            |
| 11   | <a href="https://www.ebi.ac.uk/chembl/target/inspect/CHEMBL3371">CHEMBL3371</a> (https://www.ebi.ac.uk/chembl/target/inspect/CHEMBL3371) | Serotonin 6 (5-HT6) receptor                  | Show NN            |
| 12   | <a href="https://www.ebi.ac.uk/chembl/target/inspect/CHEMBL339">CHEMBL339</a> (https://www.ebi.ac.uk/chembl/target/inspect/CHEMBL339)    | Dopamine D2 receptor                          | Show NN            |
| 13   | <a href="https://www.ebi.ac.uk/chembl/target/inspect/CHEMBL219">CHEMBL219</a> (https://www.ebi.ac.uk/chembl/target/inspect/CHEMBL219)    | Dopamine D4 receptor                          | Show NN            |
| 14   | <a href="https://www.ebi.ac.uk/chembl/target/inspect/CHEMBL225">CHEMBL225</a> (https://www.ebi.ac.uk/chembl/target/inspect/CHEMBL225)    | Serotonin 2c (5-HT2c) receptor                | Show NN            |
| 15   | <a href="https://www.ebi.ac.uk/chembl/target/inspect/CHEMBL279">CHEMBL279</a> (https://www.ebi.ac.uk/chembl/target/inspect/CHEMBL279)    | Vascular endothelial growth factor receptor 2 | Show NN            |
| 16   | <a href="https://www.ebi.ac.uk/chembl/target/inspect/CHEMBL273">CHEMBL273</a> (https://www.ebi.ac.uk/chembl/target/inspect/CHEMBL273)    | Serotonin 1a (5-HT1a) receptor                | Show NN            |
| 17   | <a href="https://www.ebi.ac.uk/chembl/target/inspect/CHEMBL4657">CHEMBL4657</a> (https://www.ebi.ac.uk/chembl/target/inspect/CHEMBL4657) | Dipeptidyl peptidase VIII                     | Show NN            |
| 18   | <a href="https://www.ebi.ac.uk/chembl/target/inspect/CHEMBL5652">CHEMBL5652</a> (https://www.ebi.ac.uk/chembl/target/inspect/CHEMBL5652) | Glucose-dependent insulintropic receptor      | Show NN            |

|    |                                                                                                                                            |                                   |         |
|----|--------------------------------------------------------------------------------------------------------------------------------------------|-----------------------------------|---------|
| 19 | CHEMBL2564 ( <a href="https://www.ebi.ac.uk/chembl/target/inspect/CHEMBL2564">https://www.ebi.ac.uk/chembl/target/inspect/CHEMBL2564</a> ) | Metabotropic glutamate receptor 5 | Show NN |
| 20 | CHEMBL4616 ( <a href="https://www.ebi.ac.uk/chembl/target/inspect/CHEMBL4616">https://www.ebi.ac.uk/chembl/target/inspect/CHEMBL4616</a> ) | Ghrelin receptor                  | Show NN |
