# Supplementary material for: Accelerating Drug Discovery by Early Protein Drug Target Prediction Based on a Multi-Fingerprint Similarity Search
Source: MDPI journal article supplement (doi:10.3390/molecules24122233), 2019-06-14
Supplement: s1 [file s1]

**MuSSel not predicted**

# SwissTargetPrediction report:

## Reference:

Gfeller D., Michielin O. & Zoete V.  
 Shaping the interaction landscape of  
 bioactive molecules, *Bioinformatics*  
 (2013) 29:3073-3079.

## Query Molecule

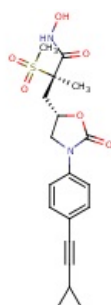

## Frequency of Target Class

| Target                                                                 | Uniprot ID | Gene code | ChEMBL ID     | Probability            | # sim. cmpds (3D / 2D) | Target Class      |
|------------------------------------------------------------------------|------------|-----------|---------------|------------------------|------------------------|-------------------|
| 22 kDa interstitial collagenase ( <i>by homology</i> )                 | P03956     | MMP1      | CHEMBL332     | <div><div></div></div> | 334 / 9                | Metallo Protease  |
| PEX                                                                    | P08253     | MMP2      | CHEMBL333     | <div><div></div></div> | 292 / 9                | Metallo Protease  |
| Stromelysin-1 ( <i>by homology</i> )                                   | P08254     | MMP3      | CHEMBL283     | <div><div></div></div> | 334 / 9                | Metallo Protease  |
| Stromelysin-2 ( <i>by homology</i> )                                   | P09238     | MMP10     | CHEMBL4270    | <div><div></div></div> | 334 / 9                | Metallo Protease  |
| 67 kDa matrix metalloproteinase-9                                      | P14780     | MMP9      | CHEMBL321     | <div><div></div></div> | 292 / 9                | Metallo Protease  |
| Neutrophil collagenase                                                 | P22894     | MMP8      | CHEMBL4588    | <div><div></div></div> | 287 / 2                | Metallo Protease  |
| Matrix metalloproteinase-27 ( <i>by homology</i> )                     | Q9H306     | MMP27     |               | <div><div></div></div> | 334 / 9                | Metallo Protease  |
| Macrophage metalloelastase ( <i>by homology</i> )                      | P39900     | MMP12     | CHEMBL4393    | <div><div></div></div> | 295 / 9                | Metallo Protease  |
| Collagenase 3                                                          | P45452     | MMP13     | CHEMBL280     | <div><div></div></div> | 296 / 9                | Metallo Protease  |
| Matrix metalloproteinase-20 ( <i>by homology</i> )                     | O60882     | MMP20     | CHEMBL1938226 | <div><div></div></div> | 185 / 9                | Enzyme            |
| Neuronal acetylcholine receptor subunit alpha-7 ( <i>by homology</i> ) | P36544     | CHRNA7    | CHEMBL2492    | <div><div></div></div> | 11 / 10                | Ion channel       |
| CHRNA7-FAM7A fusion protein ( <i>by homology</i> )                     | Q494W8     | CHRFAM7A  |               | <div><div></div></div> | 11 / 10                | Ion channel       |
| Metabotropic glutamate receptor 3 ( <i>by homology</i> )               | Q14832     | GRM3      | CHEMBL2888    | <div><div></div></div> | 1 / 29                 | Membrane receptor |
| Muscarinic acetylcholine receptor M2                                   | P08172     | CHRM2     | CHEMBL211     | <div><div></div></div> | 11 / 6                 | Membrane receptor |
| Muscarinic acetylcholine receptor M4 ( <i>by homology</i> )            | P08173     | CHRM4     | CHEMBL1821    | <div><div></div></div> | 12 / 6                 | Membrane receptor |

**Polypharmacology Browser 2 not predicted**
