# Supplementary material for: Accelerating Drug Discovery by Early Protein Drug Target Prediction Based on a Multi-Fingerprint Similarity Search
Source: MDPI journal article supplement (doi:10.3390/molecules24122233), 2019-06-14
Supplement: s1 [file s1]

**MuSSel not predicted**

# SwissTargetPrediction report:

## Reference:

Gfeller D., Michielin O. & Zoete V.  
 Shaping the interaction landscape of  
 bioactive molecules, *Bioinformatics*  
 (2013) 29:3073-3079.

## Query Molecule

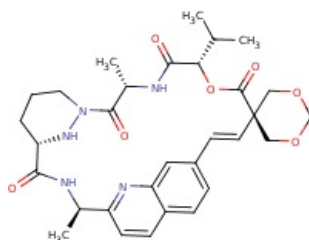

## Frequency of Target Class

| Target                              | Uniprot ID | Gene code | ChEMBL ID     | Probability            | # sim. cmpds (3D / 2D) | Target Class      |
|-------------------------------------|------------|-----------|---------------|------------------------|------------------------|-------------------|
| Caspase-3 subunit p12               | P42574     | CASP3     | CHEMBL2334    | <div><div></div></div> | 70 / 1                 | Cysteine Protease |
| Caspase-7 subunit p20 (by homology) | P55210     | CASP7     | CHEMBL3468    | <div><div></div></div> | 70 / 1                 | Cysteine Protease |
| Caspase-6 subunit p18 (by homology) | P55212     | CASP6     | CHEMBL3308    | <div><div></div></div> | 70 / 1                 | Cysteine Protease |
| Caspase-1 subunit p20               | P29466     | CASP1     | CHEMBL4801    | <div><div></div></div> | 95 / 12                | Cysteine Protease |
| Caspase-8 subunit p18               | Q14790     | CASP8     | CHEMBL3776    | <div><div></div></div> | 64 / 6                 | Cysteine Protease |
| Caspase-4 (by homology)             | P49662     | CASP4     | CHEMBL2226    | <div><div></div></div> | 95 / 12                | Cysteine Protease |
| Caspase-5 subunit p10 (by homology) | P51878     | CASP5     | CHEMBL3131    | <div><div></div></div> | 95 / 12                | Cysteine Protease |
| Inactive caspase-12 (by homology)   | Q6UXS9     | CASP12    |               | <div><div></div></div> | 95 / 12                | Cysteine Protease |
| Cathepsin L2 (by homology)          | O60911     | CTSL2     | CHEMBL3272    | <div><div></div></div> | 222 / 8                | Cysteine Protease |
| Cathepsin L1 light chain            | P07711     | CTSL1     | CHEMBL3837    | <div><div></div></div> | 222 / 8                | Cysteine Protease |
| Cathepsin S                         | P25774     | CTSS      | CHEMBL2954    | <div><div></div></div> | 221 / 8                | Cysteine Protease |
| Cathepsin K                         | P43235     | CTSK      | CHEMBL268     | <div><div></div></div> | 221 / 8                | Cysteine Protease |
| Cathepsin B                         | P07858     | CTSB      | CHEMBL4072    | <div><div></div></div> | 53 / 1                 | Cysteine Protease |
| Microtubule-associated protein tau  | P10636     | MAPT      | CHEMBL1293224 | <div><div></div></div> | 665 / 1                | Unclassified      |
| Renin                               | P00797     | REN       | CHEMBL286     | <div><div></div></div> | 360 / 57               | Aspartic Protease |

# Polypharmacology Browser 2 Prediction:

Targets predicted using NN(ECfp4) + NB(ECfp4).

Save Table

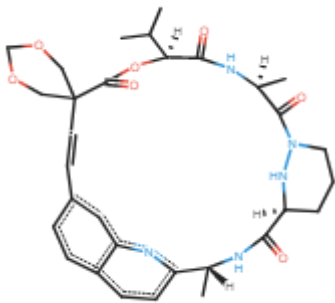

Query molecule

Target class overview

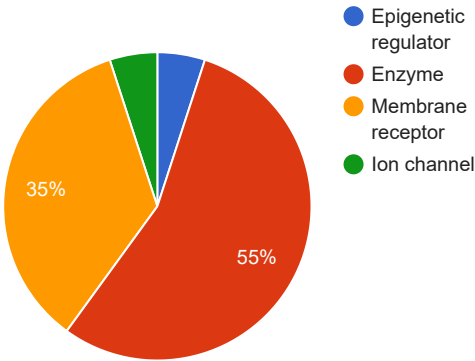

| Rank | ChEMBL ID                                                                                                                                  | Common name                              | Nearest neighbours |
|------|--------------------------------------------------------------------------------------------------------------------------------------------|------------------------------------------|--------------------|
| 1    | CHEMBL240 ( <a href="https://www.ebi.ac.uk/chembl/target/inspect/CHEMBL240">https://www.ebi.ac.uk/chembl/target/inspect/CHEMBL240</a> )    | HERG                                     | Show NN            |
| 2    | CHEMBL214 ( <a href="https://www.ebi.ac.uk/chembl/target/inspect/CHEMBL214">https://www.ebi.ac.uk/chembl/target/inspect/CHEMBL214</a> )    | Serotonin 1a (5-HT1a) receptor           | Show NN            |
| 3    | CHEMBL4822 ( <a href="https://www.ebi.ac.uk/chembl/target/inspect/CHEMBL4822">https://www.ebi.ac.uk/chembl/target/inspect/CHEMBL4822</a> ) | Beta-secretase 1                         | Show NN            |
| 4    | CHEMBL268 ( <a href="https://www.ebi.ac.uk/chembl/target/inspect/CHEMBL268">https://www.ebi.ac.uk/chembl/target/inspect/CHEMBL268</a> )    | Cathepsin K                              | Show NN            |
| 5    | CHEMBL274 ( <a href="https://www.ebi.ac.uk/chembl/target/inspect/CHEMBL274">https://www.ebi.ac.uk/chembl/target/inspect/CHEMBL274</a> )    | C-C chemokine receptor type 5            | Show NN            |
| 6    | CHEMBL340 ( <a href="https://www.ebi.ac.uk/chembl/target/inspect/CHEMBL340">https://www.ebi.ac.uk/chembl/target/inspect/CHEMBL340</a> )    | Cytochrome P450 3A4                      | Show NN            |
| 7    | CHEMBL253 ( <a href="https://www.ebi.ac.uk/chembl/target/inspect/CHEMBL253">https://www.ebi.ac.uk/chembl/target/inspect/CHEMBL253</a> )    | Cannabinoid CB2 receptor                 | Show NN            |
| 8    | CHEMBL325 ( <a href="https://www.ebi.ac.uk/chembl/target/inspect/CHEMBL325">https://www.ebi.ac.uk/chembl/target/inspect/CHEMBL325</a> )    | Histone deacetylase 1                    | Show NN            |
| 9    | CHEMBL4072 ( <a href="https://www.ebi.ac.uk/chembl/target/inspect/CHEMBL4072">https://www.ebi.ac.uk/chembl/target/inspect/CHEMBL4072</a> ) | Cathepsin B                              | Show NN            |
| 10   | CHEMBL2954 ( <a href="https://www.ebi.ac.uk/chembl/target/inspect/CHEMBL2954">https://www.ebi.ac.uk/chembl/target/inspect/CHEMBL2954</a> ) | Cathepsin S                              | Show NN            |
| 11   | CHEMBL3105 ( <a href="https://www.ebi.ac.uk/chembl/target/inspect/CHEMBL3105">https://www.ebi.ac.uk/chembl/target/inspect/CHEMBL3105</a> ) | Poly [ADP-ribose] polymerase-1           | Show NN            |
| 12   | CHEMBL4409 ( <a href="https://www.ebi.ac.uk/chembl/target/inspect/CHEMBL4409">https://www.ebi.ac.uk/chembl/target/inspect/CHEMBL4409</a> ) | Phosphodiesterase 10A                    | Show NN            |
| 13   | CHEMBL260 ( <a href="https://www.ebi.ac.uk/chembl/target/inspect/CHEMBL260">https://www.ebi.ac.uk/chembl/target/inspect/CHEMBL260</a> )    | MAP kinase p38 alpha                     | Show NN            |
| 14   | CHEMBL262 ( <a href="https://www.ebi.ac.uk/chembl/target/inspect/CHEMBL262">https://www.ebi.ac.uk/chembl/target/inspect/CHEMBL262</a> )    | Glycogen synthase kinase-3 beta          | Show NN            |
| 15   | CHEMBL4005 ( <a href="https://www.ebi.ac.uk/chembl/target/inspect/CHEMBL4005">https://www.ebi.ac.uk/chembl/target/inspect/CHEMBL4005</a> ) | PI3-kinase p110-alpha subunit            | Show NN            |
| 16   | CHEMBL3837 ( <a href="https://www.ebi.ac.uk/chembl/target/inspect/CHEMBL3837">https://www.ebi.ac.uk/chembl/target/inspect/CHEMBL3837</a> ) | Cathepsin L                              | Show NN            |
| 17   | CHEMBL344 ( <a href="https://www.ebi.ac.uk/chembl/target/inspect/CHEMBL344">https://www.ebi.ac.uk/chembl/target/inspect/CHEMBL344</a> )    | Melanin-concentrating hormone receptor 1 | Show NN            |
| 18   | CHEMBL273 ( <a href="https://www.ebi.ac.uk/chembl/target/inspect/CHEMBL273">https://www.ebi.ac.uk/chembl/target/inspect/CHEMBL273</a> )    | Serotonin 1a (5-HT1a) receptor           | Show NN            |

|    |                                                                                                                                            |                    |         |
|----|--------------------------------------------------------------------------------------------------------------------------------------------|--------------------|---------|
| 19 | CHEMBL3996 ( <a href="https://www.ebi.ac.uk/chembl/target/inspect/CHEMBL3996">https://www.ebi.ac.uk/chembl/target/inspect/CHEMBL3996</a> ) | Oxytocin receptor  | Show NN |
| 20 | CHEMBL233 ( <a href="https://www.ebi.ac.uk/chembl/target/inspect/CHEMBL233">https://www.ebi.ac.uk/chembl/target/inspect/CHEMBL233</a> )    | Mu opioid receptor | Show NN |
