# Supplementary material for: Accelerating Drug Discovery by Early Protein Drug Target Prediction Based on a Multi-Fingerprint Similarity Search
Source: MDPI journal article supplement (doi:10.3390/molecules24122233), 2019-06-14
Supplement: s1 [file s1]

**MuSSel not predicted:**

# SwissTargetPrediction report:

## Reference:

Gfeller D., Michielin O. & Zoete V.  
Shaping the interaction landscape of  
bioactive molecules, *Bioinformatics*  
(2013) 29:3073-3079.

## Query Molecule

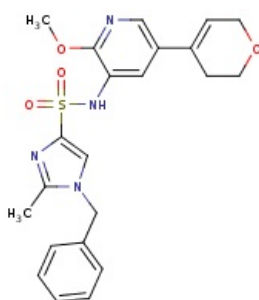

## Frequency of Target Class

| Target                                                     | Uniprot ID | Gene code | ChEMBL ID  | Probability            | # sim. cmpds (3D / 2D) | Target Class      |
|------------------------------------------------------------|------------|-----------|------------|------------------------|------------------------|-------------------|
| Vasopressin V2 receptor ( <i>by homology</i> )             | P30518     | AVPR2     | CHEMBL1790 | <div><div></div></div> | 56 / 2                 | Membrane receptor |
| Oxytocin receptor                                          | P30559     | OXTR      | CHEMBL2049 | <div><div></div></div> | 87 / 2                 | Membrane receptor |
| Vasopressin V1a receptor                                   | P37288     | AVPR1A    | CHEMBL1889 | <div><div></div></div> | 52 / 2                 | Membrane receptor |
| Vasopressin V1b receptor                                   | P47901     | AVPR1B    | CHEMBL1921 | <div><div></div></div> | 46 / 2                 | Membrane receptor |
| Pepsin A-5                                                 | P0DJD9     | PGA5      | CHEMBL3295 | <div><div></div></div> | 6 / 1                  | Aspartic Protease |
| Cathepsin E form I                                         | P14091     | CTSE      | CHEMBL3092 | <div><div></div></div> | 6 / 1                  | Aspartic Protease |
| Pepsin A-4 ( <i>by homology</i> )                          | P0DJD7     | PGA4      |            | <div><div></div></div> | 6 / 1                  | Aspartic Protease |
| Pepsin A-3 ( <i>by homology</i> )                          | P0DJD8     | PGA3      |            | <div><div></div></div> | 6 / 1                  | Aspartic Protease |
| Gastricsin ( <i>by homology</i> )                          | P20142     | PGC       | CHEMBL2136 | <div><div></div></div> | 6 / 1                  | Aspartic Protease |
| Mitogen-activated protein kinase 8 ( <i>by homology</i> )  | P45983     | MAPK8     | CHEMBL2276 | <div><div></div></div> | 401 / 0                | Ser_Thr Kinase    |
| Mitogen-activated protein kinase 9 ( <i>by homology</i> )  | P45984     | MAPK9     | CHEMBL4179 | <div><div></div></div> | 401 / 0                | Ser_Thr Kinase    |
| Mitogen-activated protein kinase 10 ( <i>by homology</i> ) | P53779     | MAPK10    | CHEMBL2637 | <div><div></div></div> | 401 / 0                | Ser_Thr Kinase    |
| Mitogen-activated protein kinase 11 ( <i>by homology</i> ) | Q15759     | MAPK11    | CHEMBL3961 | <div><div></div></div> | 413 / 0                | Ser_Thr Kinase    |
| Mitogen-activated protein kinase 14                        | Q16539     | MAPK14    | CHEMBL260  | <div><div></div></div> | 413 / 0                | Ser_Thr Kinase    |
| Platelet-activating factor receptor                        | P25105     | PTAFR     | CHEMBL250  | <div><div></div></div> | 42 / 0                 | Membrane receptor |

## Polypharmacology Browser 2 Prediction:

Targets predicted using NN(ECfp4) + NB(ECfp4).

[Save Table](#)

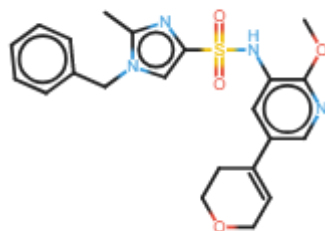

Query molecule

Target class overview

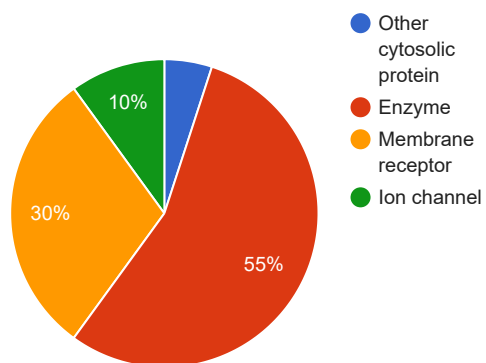

| Rank | ChEMBL ID                                                                                                                                     | Common name                                                     | Nearest neighbours |
|------|-----------------------------------------------------------------------------------------------------------------------------------------------|-----------------------------------------------------------------|--------------------|
| 1    | CHEMBL4005<br>( <a href="https://www.ebi.ac.uk/chembl/target/inspect/CHEMBL4005">https://www.ebi.ac.uk/chembl/target/inspect/CHEMBL4005</a> ) | PI3-kinase p110-alpha subunit                                   | Show NN            |
| 2    | CHEMBL2842<br>( <a href="https://www.ebi.ac.uk/chembl/target/inspect/CHEMBL2842">https://www.ebi.ac.uk/chembl/target/inspect/CHEMBL2842</a> ) | Serine/threonine-protein kinase mTOR                            | Show NN            |
| 3    | CHEMBL3130<br>( <a href="https://www.ebi.ac.uk/chembl/target/inspect/CHEMBL3130">https://www.ebi.ac.uk/chembl/target/inspect/CHEMBL3130</a> ) | PI3-kinase p110-delta subunit                                   | Show NN            |
| 4    | CHEMBL3145<br>( <a href="https://www.ebi.ac.uk/chembl/target/inspect/CHEMBL3145">https://www.ebi.ac.uk/chembl/target/inspect/CHEMBL3145</a> ) | PI3-kinase p110-beta subunit                                    | Show NN            |
| 5    | CHEMBL3267<br>( <a href="https://www.ebi.ac.uk/chembl/target/inspect/CHEMBL3267">https://www.ebi.ac.uk/chembl/target/inspect/CHEMBL3267</a> ) | PI3-kinase p110-gamma subunit                                   | Show NN            |
| 6    | CHEMBL3371<br>( <a href="https://www.ebi.ac.uk/chembl/target/inspect/CHEMBL3371">https://www.ebi.ac.uk/chembl/target/inspect/CHEMBL3371</a> ) | Serotonin 6 (5-HT6) receptor                                    | Show NN            |
| 7    | CHEMBL4409<br>( <a href="https://www.ebi.ac.uk/chembl/target/inspect/CHEMBL4409">https://www.ebi.ac.uk/chembl/target/inspect/CHEMBL4409</a> ) | Phosphodiesterase 10A                                           | Show NN            |
| 8    | CHEMBL3667<br>( <a href="https://www.ebi.ac.uk/chembl/target/inspect/CHEMBL3667">https://www.ebi.ac.uk/chembl/target/inspect/CHEMBL3667</a> ) | PI4-kinase alpha subunit                                        | Show NN            |
| 9    | CHEMBL4296<br>( <a href="https://www.ebi.ac.uk/chembl/target/inspect/CHEMBL4296">https://www.ebi.ac.uk/chembl/target/inspect/CHEMBL4296</a> ) | Sodium channel protein type IX alpha subunit                    | Show NN            |
| 10   | CHEMBL217<br>( <a href="https://www.ebi.ac.uk/chembl/target/inspect/CHEMBL217">https://www.ebi.ac.uk/chembl/target/inspect/CHEMBL217</a> )    | Dopamine D2 receptor                                            | Show NN            |
| 11   | CHEMBL6140<br>( <a href="https://www.ebi.ac.uk/chembl/target/inspect/CHEMBL6140">https://www.ebi.ac.uk/chembl/target/inspect/CHEMBL6140</a> ) | cAMP and cAMP-inhibited cGMP 3',5'-cyclic phosphodiesterase 10A | Show NN            |
| 12   | CHEMBL3717<br>( <a href="https://www.ebi.ac.uk/chembl/target/inspect/CHEMBL3717">https://www.ebi.ac.uk/chembl/target/inspect/CHEMBL3717</a> ) | Hepatocyte growth factor receptor                               | Show NN            |
| 13   | CHEMBL218<br>( <a href="https://www.ebi.ac.uk/chembl/target/inspect/CHEMBL218">https://www.ebi.ac.uk/chembl/target/inspect/CHEMBL218</a> )    | Cannabinoid CB1 receptor                                        | Show NN            |

|    |                                                                                                                                               |                                        |         |
|----|-----------------------------------------------------------------------------------------------------------------------------------------------|----------------------------------------|---------|
| 14 | CHEMBL203<br>( <a href="https://www.ebi.ac.uk/chembl/target/inspect/CHEMBL203">https://www.ebi.ac.uk/chembl/target/inspect/CHEMBL203</a> )    | Epidermal growth factor receptor erbB1 | Show NN |
| 15 | CHEMBL240<br>( <a href="https://www.ebi.ac.uk/chembl/target/inspect/CHEMBL240">https://www.ebi.ac.uk/chembl/target/inspect/CHEMBL240</a> )    | HERG                                   | Show NN |
| 16 | CHEMBL4550<br>( <a href="https://www.ebi.ac.uk/chembl/target/inspect/CHEMBL4550">https://www.ebi.ac.uk/chembl/target/inspect/CHEMBL4550</a> ) | 5-lipoxygenase activating protein      | Show NN |
| 17 | CHEMBL5071<br>( <a href="https://www.ebi.ac.uk/chembl/target/inspect/CHEMBL5071">https://www.ebi.ac.uk/chembl/target/inspect/CHEMBL5071</a> ) | G protein-coupled receptor 44          | Show NN |
| 18 | CHEMBL253<br>( <a href="https://www.ebi.ac.uk/chembl/target/inspect/CHEMBL253">https://www.ebi.ac.uk/chembl/target/inspect/CHEMBL253</a> )    | Cannabinoid CB2 receptor               | Show NN |
| 19 | CHEMBL2599<br>( <a href="https://www.ebi.ac.uk/chembl/target/inspect/CHEMBL2599">https://www.ebi.ac.uk/chembl/target/inspect/CHEMBL2599</a> ) | Tyrosine-protein kinase SYK            | Show NN |
| 20 | CHEMBL234<br>( <a href="https://www.ebi.ac.uk/chembl/target/inspect/CHEMBL234">https://www.ebi.ac.uk/chembl/target/inspect/CHEMBL234</a> )    | Dopamine D3 receptor                   | Show NN |
