# Supplementary material for: Accelerating Drug Discovery by Early Protein Drug Target Prediction Based on a Multi-Fingerprint Similarity Search
Source: MDPI journal article supplement (doi:10.3390/molecules24122233), 2019-06-14
Supplement: s1 [file s1]

## MuSSEL Prediction k<sub>i</sub>:

1 rank

C-C chemokine receptor type 5 : Homo sapiens

score: 8.948 on ChEMBL274 based on 10 fingerprints

| Fingerprint type | Ligand       | Tanimoto Similarity | activity | Valid fg |
|------------------|--------------|---------------------|----------|----------|
| FeatMFP1         | CHEMBL425618 | 0.931034            | 0.24     | *        |
| MFP1             | CHEMBL425618 | 0.883721            | 0.24     | *        |
| RDKit7           | CHEMBL425618 | 0.884321            | 0.24     | *        |
| Pattern          | CHEMBL425618 | 0.947099            | 0.24     | *        |
| AP_bits          | CHEMBL425618 | 0.899791            | 0.24     | *        |
| TT_bits          | CHEMBL425618 | 0.851351            | 0.24     | *        |
| FP2              | CHEMBL425618 | 0.718121            | 0.24     | *        |
| hybridization    | CHEMBL425618 | 0.657005            | 0.24     |          |
| substructure     | CHEMBL425618 | 0.954545            | 0.24     | *        |
| graph            | CHEMBL425618 | 0.643617            | 0.24     |          |
| pubchem          | CHEMBL425618 | 0.819277            | 0.24     |          |
| cdk_maccs        | CHEMBL425618 | 0.970149            | 0.24     | *        |
| klekota_roth     | CHEMBL425618 | 0.908163            | 0.24     | *        |

\*\*\* ki ACTIVITY \*\*\* value prediction

based on 10 locally validated fgps ---> 30.142

["TT\_bits", "substructure", "Pattern", "FP2", "MFP1", "klekota\_roth",  
"AP\_bits", "FeatMFP1", "RDKit7", "cdk\_maccs"]

## MuSSEL Prediction IC<sub>50</sub>:

1 rank

HERG : Homo sapiens

score: 9.696 on ChEMBL240 based on 11 fingerprints

| Fingerprint type | Ligand        | Tanimoto | Similarity | activity | Valid | fg |
|------------------|---------------|----------|------------|----------|-------|----|
| FeatMFP1         | CHEMBL1201187 |          | 0.931034   | 39810.72 | *     |    |
| MFP1             | CHEMBL1201187 |          | 0.883721   | 39810.72 | *     |    |
| RDKit7           | CHEMBL1201187 |          | 0.884321   | 39810.72 | *     |    |
| Pattern          | CHEMBL3084350 |          | 0.951724   | 10000.00 | *     |    |
| AP_bits          | CHEMBL1201187 |          | 0.899791   | 39810.72 | *     |    |
| TT_bits          | CHEMBL1201187 |          | 0.851351   | 39810.72 | *     |    |
| FP2              | CHEMBL1201187 |          | 0.718121   | 39810.72 | *     |    |
| hybridization    | CHEMBL1201187 |          | 0.741546   | 39810.72 | *     |    |
| substructure     | CHEMBL1834797 |          | 0.956522   | 25000.00 | *     |    |
| graph            | CHEMBL1201187 |          | 0.739362   | 39810.72 |       |    |
| pubchem          | CHEMBL1201187 |          | 0.825301   | 39810.72 |       |    |
| cdk_maccs        | CHEMBL1201187 |          | 0.970149   | 39810.72 | *     |    |
| klekota_roth     | CHEMBL1201187 |          | 0.908163   | 39810.72 | *     |    |

\*\*\* ic50 ACTIVITY \*\*\* value prediction

based on 11 locally validated fgps ---> 25074.453

["TT\_bits", "substructure", "cdk\_maccs", "Pattern", "FP2", "MFP1",  
"klekota\_roth", "AP\_bits", "FeatMFP1", "RDKit7", "hybridization"]

2 rank

C-X-C chemokine receptor type 5 : Homo sapiens

score: 9.690 on ChEMBL1075315 based on 11 fingerprints

| Fingerprint type | Ligand        | Tanimoto | Similarity | activity | Valid | fg |
|------------------|---------------|----------|------------|----------|-------|----|
| FeatMFP1         | CHEMBL1201187 |          | 0.931034   | 0.0024   | *     |    |
| MFP1             | CHEMBL1201187 |          | 0.883721   | 0.0024   | *     |    |
| RDKit7           | CHEMBL1201187 |          | 0.884321   | 0.0024   | *     |    |
| Pattern          | CHEMBL1201187 |          | 0.947099   | 0.0024   | *     |    |
| AP_bits          | CHEMBL1201187 |          | 0.899791   | 0.0024   | *     |    |
| TT_bits          | CHEMBL1201187 |          | 0.851351   | 0.0024   | *     |    |
| FP2              | CHEMBL1201187 |          | 0.718121   | 0.0024   | *     |    |
| hybridization    | CHEMBL1201187 |          | 0.741546   | 0.0024   | *     |    |
| substructure     | CHEMBL1201187 |          | 0.954545   | 0.0024   | *     |    |
| graph            | CHEMBL1201187 |          | 0.739362   | 0.0024   |       |    |
| pubchem          | CHEMBL1201187 |          | 0.825301   | 0.0024   |       |    |
| cdk_maccs        | CHEMBL1201187 |          | 0.970149   | 0.0024   | *     |    |
| klekota_roth     | CHEMBL1201187 |          | 0.908163   | 0.0024   | *     |    |

\*\*\* ic50 ACTIVITY \*\*\* value prediction

based on 11 locally validated fgps ---> 0.002

["TT\_bits", "substructure", "cdk\_maccs", "Pattern", "FP2", "MFP1",  
"klekota\_roth", "AP\_bits", "FeatMFP1", "RDKit7", "hybridization"]

3 rank

Multidrug and toxin extrusion protein 1 : Homo sapiens

score: 9.690 on ChEMBL1743126 based on 11 fingerprints

| Fingerprint type | Ligand        | Tanimoto | Similarity | activity | Valid | fg |
|------------------|---------------|----------|------------|----------|-------|----|
| FeatMFP1         | CHEMBL1201187 |          | 0.931034   | 17300.0  | *     |    |
| MFP1             | CHEMBL1201187 |          | 0.883721   | 17300.0  | *     |    |
| RDKit7           | CHEMBL1201187 |          | 0.884321   | 17300.0  | *     |    |
| Pattern          | CHEMBL1201187 |          | 0.947099   | 17300.0  | *     |    |
| AP_bits          | CHEMBL1201187 |          | 0.899791   | 17300.0  | *     |    |
| TT_bits          | CHEMBL1201187 |          | 0.851351   | 17300.0  | *     |    |
| FP2              | CHEMBL1201187 |          | 0.718121   | 17300.0  | *     |    |
| hybridization    | CHEMBL1201187 |          | 0.741546   | 17300.0  | *     |    |
| substructure     | CHEMBL1201187 |          | 0.954545   | 17300.0  | *     |    |
| graph            | CHEMBL1201187 |          | 0.739362   | 17300.0  |       |    |
| pubchem          | CHEMBL1201187 |          | 0.825301   | 17300.0  |       |    |
| cdk_maccs        | CHEMBL1201187 |          | 0.970149   | 17300.0  | *     |    |

```

klekota_roth CHEMBL1201187          0.908163    17300.0      *
*** ic50 ACTIVITY *** value prediction
based on 11 locally validated fgps ---> 17300.000
["TT_bits", "substructure", "cdk_maccs", "Pattern", "FP2", "MFP1",
"klekota_roth", "AP_bits", "FeatMFP1", "RDKit7", "hybridization"]

```

4 rank

Voltage-gated potassium channel, IKs; KCNQ1(Kv7.1)/KCNE1(MinK) : Homo sapiens

score: 9.690 on CHEMBL2221347 based on 11 fingerprints

| Fingerprint type | Ligand        | Tanimoto | Similarity | activity | Valid | fg |
|------------------|---------------|----------|------------|----------|-------|----|
| FeatMFP1         | CHEMBL1201187 |          | 0.931034   | 63095.73 | *     |    |
| MFP1             | CHEMBL1201187 |          | 0.883721   | 63095.73 | *     |    |
| RDKit7           | CHEMBL1201187 |          | 0.884321   | 63095.73 | *     |    |
| Pattern          | CHEMBL1201187 |          | 0.947099   | 63095.73 | *     |    |
| AP_bits          | CHEMBL1201187 |          | 0.899791   | 63095.73 | *     |    |
| TT_bits          | CHEMBL1201187 |          | 0.851351   | 63095.73 | *     |    |
| FP2              | CHEMBL1201187 |          | 0.718121   | 63095.73 | *     |    |
| hybridization    | CHEMBL1201187 |          | 0.741546   | 63095.73 | *     |    |
| substructure     | CHEMBL1201187 |          | 0.954545   | 63095.73 | *     |    |
| graph            | CHEMBL1201187 |          | 0.739362   | 63095.73 |       |    |
| pubchem          | CHEMBL1201187 |          | 0.825301   | 63095.73 |       |    |
| cdk_maccs        | CHEMBL1201187 |          | 0.970149   | 63095.73 | *     |    |
| klekota_roth     | CHEMBL1201187 |          | 0.908163   | 63095.73 | *     |    |

```

*** ic50 ACTIVITY *** value prediction
based on 11 locally validated fgps ---> 63095.730
["TT_bits", "substructure", "cdk_maccs", "Pattern", "FP2", "MFP1",
"klekota_roth", "AP_bits", "FeatMFP1", "RDKit7", "hybridization"]

```

5 rank

C-C chemokine receptor type 5 : Homo sapiens

score: 9.690 on CHEMBL274 based on 11 fingerprints

| Fingerprint type | Ligand        | Tanimoto | Similarity | activity | Valid | fg |
|------------------|---------------|----------|------------|----------|-------|----|
| FeatMFP1         | CHEMBL1201187 |          | 0.931034   | 0.2      | *     |    |
| MFP1             | CHEMBL1201187 |          | 0.883721   | 0.2      | *     |    |
| RDKit7           | CHEMBL1201187 |          | 0.884321   | 0.2      | *     |    |
| Pattern          | CHEMBL1201187 |          | 0.947099   | 0.2      | *     |    |
| AP_bits          | CHEMBL1201187 |          | 0.899791   | 0.2      | *     |    |
| TT_bits          | CHEMBL1201187 |          | 0.851351   | 0.2      | *     |    |
| FP2              | CHEMBL1201187 |          | 0.718121   | 0.2      | *     |    |
| hybridization    | CHEMBL1201187 |          | 0.741546   | 0.2      | *     |    |
| substructure     | CHEMBL1201187 |          | 0.954545   | 0.2      | *     |    |
| graph            | CHEMBL1201187 |          | 0.739362   | 0.2      |       |    |
| pubchem          | CHEMBL1201187 |          | 0.825301   | 0.2      |       |    |
| cdk_maccs        | CHEMBL1201187 |          | 0.970149   | 0.2      | *     |    |
| klekota_roth     | CHEMBL1201187 |          | 0.908163   | 0.2      | *     |    |

```

*** ic50 ACTIVITY *** value prediction
based on 11 locally validated fgps ---> 1.272
["TT_bits", "substructure", "cdk_maccs", "Pattern", "FP2", "MFP1",
"klekota_roth", "AP_bits", "FeatMFP1", "RDKit7", "hybridization"]

```

# Polypharmacology Browser 2 Prediction:

Targets predicted using NN(ECfp4) + NB(ECfp4).

Save Table

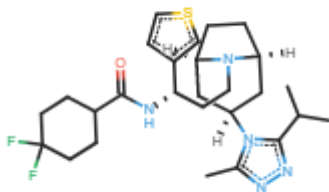

Query molecule

Target class overview

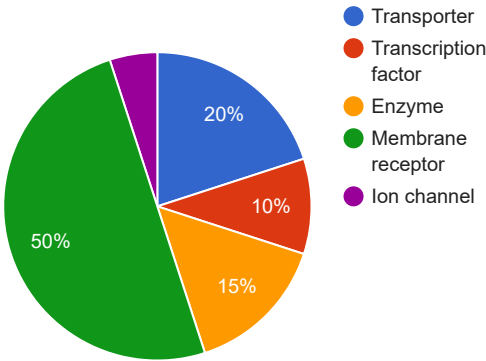

| Rank | ChEMBL ID                                                                                                                                  | Common name                              | Nearest neighbours |
|------|--------------------------------------------------------------------------------------------------------------------------------------------|------------------------------------------|--------------------|
| 1    | CHEMBL274 ( <a href="https://www.ebi.ac.uk/chembl/target/inspect/CHEMBL274">https://www.ebi.ac.uk/chembl/target/inspect/CHEMBL274</a> )    | C-C chemokine receptor type 5            | Show NN            |
| 2    | CHEMBL240 ( <a href="https://www.ebi.ac.uk/chembl/target/inspect/CHEMBL240">https://www.ebi.ac.uk/chembl/target/inspect/CHEMBL240</a> )    | HERG                                     | Show NN            |
| 3    | CHEMBL217 ( <a href="https://www.ebi.ac.uk/chembl/target/inspect/CHEMBL217">https://www.ebi.ac.uk/chembl/target/inspect/CHEMBL217</a> )    | Dopamine D2 receptor                     | Show NN            |
| 4    | CHEMBL268 ( <a href="https://www.ebi.ac.uk/chembl/target/inspect/CHEMBL268">https://www.ebi.ac.uk/chembl/target/inspect/CHEMBL268</a> )    | Cathepsin K                              | Show NN            |
| 5    | CHEMBL233 ( <a href="https://www.ebi.ac.uk/chembl/target/inspect/CHEMBL233">https://www.ebi.ac.uk/chembl/target/inspect/CHEMBL233</a> )    | Mu opioid receptor                       | Show NN            |
| 6    | CHEMBL2954 ( <a href="https://www.ebi.ac.uk/chembl/target/inspect/CHEMBL2954">https://www.ebi.ac.uk/chembl/target/inspect/CHEMBL2954</a> ) | Cathepsin S                              | Show NN            |
| 7    | CHEMBL216 ( <a href="https://www.ebi.ac.uk/chembl/target/inspect/CHEMBL216">https://www.ebi.ac.uk/chembl/target/inspect/CHEMBL216</a> )    | Muscarinic acetylcholine receptor M1     | Show NN            |
| 8    | CHEMBL237 ( <a href="https://www.ebi.ac.uk/chembl/target/inspect/CHEMBL237">https://www.ebi.ac.uk/chembl/target/inspect/CHEMBL237</a> )    | Kappa opioid receptor                    | Show NN            |
| 9    | CHEMBL338 ( <a href="https://www.ebi.ac.uk/chembl/target/inspect/CHEMBL338">https://www.ebi.ac.uk/chembl/target/inspect/CHEMBL338</a> )    | Dopamine transporter                     | Show NN            |
| 10   | CHEMBL264 ( <a href="https://www.ebi.ac.uk/chembl/target/inspect/CHEMBL264">https://www.ebi.ac.uk/chembl/target/inspect/CHEMBL264</a> )    | Histamine H3 receptor                    | Show NN            |
| 11   | CHEMBL313 ( <a href="https://www.ebi.ac.uk/chembl/target/inspect/CHEMBL313">https://www.ebi.ac.uk/chembl/target/inspect/CHEMBL313</a> )    | Serotonin transporter                    | Show NN            |
| 12   | CHEMBL344 ( <a href="https://www.ebi.ac.uk/chembl/target/inspect/CHEMBL344">https://www.ebi.ac.uk/chembl/target/inspect/CHEMBL344</a> )    | Melanin-concentrating hormone receptor 1 | Show NN            |
| 13   | CHEMBL3227 ( <a href="https://www.ebi.ac.uk/chembl/target/inspect/CHEMBL3227">https://www.ebi.ac.uk/chembl/target/inspect/CHEMBL3227</a> ) | Metabotropic glutamate receptor 5        | Show NN            |
| 14   | CHEMBL4015 ( <a href="https://www.ebi.ac.uk/chembl/target/inspect/CHEMBL4015">https://www.ebi.ac.uk/chembl/target/inspect/CHEMBL4015</a> ) | C-C chemokine receptor type 2            | Show NN            |
| 15   | CHEMBL3837 ( <a href="https://www.ebi.ac.uk/chembl/target/inspect/CHEMBL3837">https://www.ebi.ac.uk/chembl/target/inspect/CHEMBL3837</a> ) | Cathepsin L                              | Show NN            |
| 16   | CHEMBL304 ( <a href="https://www.ebi.ac.uk/chembl/target/inspect/CHEMBL304">https://www.ebi.ac.uk/chembl/target/inspect/CHEMBL304</a> )    | Norepinephrine transporter               | Show NN            |
| 17   | CHEMBL2034 ( <a href="https://www.ebi.ac.uk/chembl/target/inspect/CHEMBL2034">https://www.ebi.ac.uk/chembl/target/inspect/CHEMBL2034</a> ) | Glucocorticoid receptor                  | Show NN            |
| 18   | CHEMBL276 ( <a href="https://www.ebi.ac.uk/chembl/target/inspect/CHEMBL276">https://www.ebi.ac.uk/chembl/target/inspect/CHEMBL276</a> )    | Muscarinic acetylcholine receptor M1     | Show NN            |

|    |                                                                                                                                         |                                                  |         |
|----|-----------------------------------------------------------------------------------------------------------------------------------------|--------------------------------------------------|---------|
| 19 | CHEMBL222 ( <a href="https://www.ebi.ac.uk/chembl/target/inspect/CHEMBL222">https://www.ebi.ac.uk/chembl/target/inspect/CHEMBL222</a> ) | Norepinephrine transporter                       | Show NN |
| 20 | CHEMBL235 ( <a href="https://www.ebi.ac.uk/chembl/target/inspect/CHEMBL235">https://www.ebi.ac.uk/chembl/target/inspect/CHEMBL235</a> ) | Peroxisome proliferator-activated receptor gamma | Show NN |

# SwissTargetPrediction report:

## Reference:

Gfeller D., Michielin O. & Zoete V.  
Shaping the interaction landscape of  
bioactive molecules, *Bioinformatics*  
(2013) 29:3073-3079.

## Query Molecule

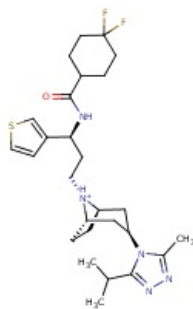

## Frequency of Target Class

| Target                                                                                               | Uniprot ID | Gene code | ChEMBL ID  | Probability            | # sim. cmpds (3D / 2D) | Target Class      |
|------------------------------------------------------------------------------------------------------|------------|-----------|------------|------------------------|------------------------|-------------------|
| C-C chemokine receptor type 1 ( <i>by homology</i> )                                                 | P32246     | CCR1      | CHEMBL2413 | <div><div></div></div> | 958 / 54               | Membrane receptor |
| C-C chemokine receptor type 2 ( <i>by homology</i> )                                                 | P41597     | CCR2      | CHEMBL4015 | <div><div></div></div> | 977 / 54               | Membrane receptor |
| C-C chemokine receptor type 3                                                                        | P51677     | CCR3      | CHEMBL3473 | <div><div></div></div> | 958 / 54               | Membrane receptor |
| C-C chemokine receptor type 5                                                                        | P51681     | CCR5      | CHEMBL274  | <div><div></div></div> | 977 / 54               | Membrane receptor |
| C-C chemokine receptor-like 2 ( <i>by homology</i> )                                                 | C9JP23     | CCRL2     |            | <div><div></div></div> | 875 / 54               | Membrane receptor |
| Potassium voltage-gated channel subfamily H member 2                                                 | Q12809     | KCNH2     | CHEMBL240  | <div><div></div></div> | 526 / 5                | Ion channel       |
| Potassium voltage-gated channel subfamily H member 6 ( <i>by homology</i> )                          | Q9H252     | KCNH6     |            | <div><div></div></div> | 526 / 5                | Ion channel       |
| Potassium voltage-gated channel subfamily H member 7 ( <i>by homology</i> )                          | Q9NS40     | KCNH7     |            | <div><div></div></div> | 526 / 5                | Ion channel       |
| Sodium- and chloride-dependent glycine transporter 1                                                 | P48067     | SLC6A9    | CHEMBL2337 | <div><div></div></div> | 435 / 3                | Transporter       |
| Sodium- and chloride-dependent glycine transporter 2 ( <i>by homology</i> )                          | Q9Y345     | SLC6A5    | CHEMBL3060 | <div><div></div></div> | 435 / 3                | Transporter       |
| Sodium-dependent proline transporter ( <i>by homology</i> )                                          | Q99884     | SLC6A7    |            | <div><div></div></div> | 435 / 3                | Transporter       |
| Sodium- and chloride-dependent neutral and basic amino acid transporter B(0+) ( <i>by homology</i> ) | Q9UN76     | SLC6A14   |            | <div><div></div></div> | 435 / 3                | Transporter       |
| Muscarinic acetylcholine receptor M2                                                                 | P08172     | CHRM2     | CHEMBL211  | <div><div></div></div> | 201 / 3                | Membrane receptor |
| Muscarinic acetylcholine receptor M4 ( <i>by homology</i> )                                          | P08173     | CHRM4     | CHEMBL1821 | <div><div></div></div> | 246 / 3                | Membrane receptor |
| Muscarinic acetylcholine receptor M5 ( <i>by homology</i> )                                          | P08912     | CHRM5     | CHEMBL2035 | <div><div></div></div> | 204 / 3                | Membrane receptor |
