# Supplementary material for: Accelerating Drug Discovery by Early Protein Drug Target Prediction Based on a Multi-Fingerprint Similarity Search
Source: MDPI journal article supplement (doi:10.3390/molecules24122233), 2019-06-14
Supplement: s1 [file s1]

## MuSSEL Prediction k<sub>i</sub>:

1 rank

Dopamine D2 receptor : Homo sapiens

score: 6.431 on ChEMBL217 based on 8 fingerprints

| Fingerprint type | Ligand        | Tanimoto | Similarity | activity | Valid | fg |
|------------------|---------------|----------|------------|----------|-------|----|
| FeatMFP1         | CHEMBL143027  |          | 0.913043   | 16.22    |       | *  |
| MFP1             | CHEMBL3104647 |          | 0.636364   | 46.77    |       | *  |
| RDKit7           | CHEMBL3104516 |          | 0.669746   | 50.12    |       |    |
| Pattern          | CHEMBL3104517 |          | 0.815592   | 17.38    |       |    |
| AP_bits          | CHEMBL3220218 |          | 0.541578   | 199.53   |       | *  |
| TT_bits          | CHEMBL3104647 |          | 0.511628   | 46.77    |       |    |
| FP2              | CHEMBL3104516 |          | 0.653409   | 50.12    |       |    |
| hybridization    | CHEMBL85      |          | 0.570016   | 0.44     |       |    |
| substructure     | CHEMBL155486  |          | 0.954545   | 57.54    |       | *  |
| graph            | CHEMBL2207489 |          | 0.913043   | 34.00    |       | *  |
| pubchem          | CHEMBL198599  |          | 0.858586   | 35.00    |       | *  |
| cdk_maccs        | CHEMBL3104516 |          | 0.921875   | 50.12    |       | *  |
| klekota_roth     | CHEMBL2059305 |          | 0.691489   | 42.00    |       | *  |

\*\*\* ki ACTIVITY \*\*\* value prediction

based on 8 locally validated fgps ---> 57.147

["substructure", "AP\_bits", "MFP1", "pubchem", "graph", "FeatMFP1",  
"klekota\_roth", "cdk\_maccs"]

2 rank

Serotonin 2a (5-HT<sub>2a</sub>) receptor : Rattus norvegicus

score: 5.897 on ChEMBL322 based on 7 fingerprints

| Fingerprint type | Ligand        | Tanimoto | Similarity | activity | Valid | fg |
|------------------|---------------|----------|------------|----------|-------|----|
| FeatMFP1         | CHEMBL110948  |          | 0.913043   | 2.754    |       | *  |
| MFP1             | CHEMBL3740807 |          | 0.666667   | 19.000   |       | *  |
| RDKit7           | CHEMBL155486  |          | 0.649260   | 2.692    |       |    |
| Pattern          | CHEMBL333174  |          | 0.822767   | 1.585    |       |    |
| AP_bits          | CHEMBL3120699 |          | 0.635220   | 125.600  |       | *  |
| TT_bits          | CHEMBL3740807 |          | 0.523810   | 19.000   |       |    |
| FP2              | CHEMBL3742070 |          | 0.642045   | 26.900   |       |    |
| hybridization    | CHEMBL3634824 |          | 0.588869   | 38.100   |       |    |
| substructure     | CHEMBL155486  |          | 0.954545   | 2.692    |       | *  |
| graph            | CHEMBL3741516 |          | 0.924370   | 2115.000 |       | *  |
| pubchem          | CHEMBL3741596 |          | 0.896739   | 113.800  |       | *  |
| cdk_maccs        | CHEMBL143027  |          | 0.906250   | 5.495    |       | *  |
| klekota_roth     | CHEMBL3742362 |          | 0.561905   | 215.600  |       |    |

\*\*\* ki ACTIVITY \*\*\* value prediction

based on 7 locally validated fgps ---> 193.388

["substructure", "AP\_bits", "MFP1", "pubchem", "graph", "FeatMFP1",  
"cdk\_maccs"]

3 rank

Dopamine D2 receptor : Rattus norvegicus

score: 5.855 on ChEMBL339 based on 7 fingerprints

| Fingerprint type | Ligand        | Tanimoto | Similarity | activity | Valid | fg |
|------------------|---------------|----------|------------|----------|-------|----|
| FeatMFP1         | CHEMBL143027  |          | 0.913043   | 9.55     |       | *  |
| MFP1             | CHEMBL3740807 |          | 0.666667   | 86.80    |       | *  |
| RDKit7           | CHEMBL3233412 |          | 0.662634   | 192.00   |       |    |
| Pattern          | CHEMBL333174  |          | 0.822767   | 141.25   |       |    |
| AP_bits          | CHEMBL3120699 |          | 0.635220   | 623.80   |       | *  |
| TT_bits          | CHEMBL3740807 |          | 0.523810   | 86.80    |       |    |
| FP2              | CHEMBL3233412 |          | 0.644330   | 192.00   |       |    |
| hybridization    | CHEMBL3634824 |          | 0.588869   | 53.10    |       |    |
| substructure     | CHEMBL143027  |          | 0.913043   | 9.55     |       | *  |
| graph            | CHEMBL3741596 |          | 0.924370   | 1273.80  |       | *  |
| pubchem          | CHEMBL3741596 |          | 0.896739   | 1273.80  |       | *  |
| cdk_maccs        | CHEMBL143027  |          | 0.906250   | 9.55     |       | *  |

```

klekota_roth CHEMBL3233427          0.578431      27.00
*** ki ACTIVITY *** value prediction
based on 7 locally validated fgps ---> 375.772
["substructure", "AP_bits", "MFP1", "pubchem", "graph", "FeatMFP1",
"cdk_maccs"]

```

4 rank

Serotonin 1a (5-HT1a) receptor : Rattus norvegicus

score: 5.788 on ChEMBL273 based on 7 fingerprints

| Fingerprint type | Ligand        | Tanimoto | Similarity | activity | Valid | fg |
|------------------|---------------|----------|------------|----------|-------|----|
| FeatMFP1         | CHEMBL3740807 |          | 0.869565   | 156.9    |       | *  |
| MFP1             | CHEMBL3740807 |          | 0.666667   | 156.9    |       | *  |
| RDKit7           | CHEMBL3742070 |          | 0.630400   | 276.5    |       |    |
| Pattern          | CHEMBL2387233 |          | 0.812139   | 3071.6   |       |    |
| AP_bits          | CHEMBL3120688 |          | 0.628998   | 47.5     |       | *  |
| TT_bits          | CHEMBL3740807 |          | 0.523810   | 156.9    |       |    |
| FP2              | CHEMBL3742070 |          | 0.642045   | 276.5    |       |    |
| hybridization    | CHEMBL3634824 |          | 0.588869   | 31.1     |       |    |
| substructure     | CHEMBL3740807 |          | 0.913043   | 156.9    |       | *  |
| graph            | CHEMBL3741596 |          | 0.924370   | 598.9    |       | *  |
| pubchem          | CHEMBL3741596 |          | 0.896739   | 598.9    |       | *  |
| cdk_maccs        | CHEMBL3740807 |          | 0.888889   | 156.9    |       | *  |
| klekota_roth     | CHEMBL314430  |          | 0.575758   | 250.0    |       |    |

```

*** ki ACTIVITY *** value prediction
based on 7 locally validated fgps ---> 352.759
["substructure", "AP_bits", "MFP1", "pubchem", "graph", "FeatMFP1",
"cdk_maccs"]

```

5 rank

Serotonin 2a (5-HT2a) receptor : Homo sapiens

score: 5.717 on ChEMBL224 based on 7 fingerprints

| Fingerprint type | Ligand        | Tanimoto | Similarity | activity | Valid | fg |
|------------------|---------------|----------|------------|----------|-------|----|
| FeatMFP1         | CHEMBL143027  |          | 0.913043   | 5.495    |       | *  |
| MFP1             | CHEMBL3104647 |          | 0.636364   | 5.012    |       | *  |
| RDKit7           | CHEMBL3104516 |          | 0.669746   | 31.620   |       |    |
| Pattern          | CHEMBL333174  |          | 0.822767   | 1.175    |       |    |
| AP_bits          | CHEMBL3220218 |          | 0.541578   | 19.950   |       | *  |
| TT_bits          | CHEMBL3104647 |          | 0.511628   | 5.012    |       |    |
| FP2              | CHEMBL3104516 |          | 0.653409   | 31.620   |       |    |
| hybridization    | CHEMBL85      |          | 0.570016   | 0.099    |       |    |
| substructure     | CHEMBL155486  |          | 0.954545   | 2.692    |       | *  |
| graph            | CHEMBL155486  |          | 0.890756   | 2.692    |       | *  |
| pubchem          | CHEMBL198599  |          | 0.858586   | 0.280    |       | *  |
| cdk_maccs        | CHEMBL3104516 |          | 0.921875   | 31.620   |       | *  |
| klekota_roth     | CHEMBL163904  |          | 0.612245   | 1.200    |       |    |

```

*** ki ACTIVITY *** value prediction
based on 7 locally validated fgps ---> 10.793
["substructure", "AP_bits", "MFP1", "pubchem", "graph", "FeatMFP1",
"cdk_maccs"]

```

6 rank

Serotonin 2c (5-HT2c) receptor : Homo sapiens

score: 5.665 on ChEMBL225 based on 7 fingerprints

| Fingerprint type | Ligand        | Tanimoto | Similarity | activity | Valid | fg |
|------------------|---------------|----------|------------|----------|-------|----|
| FeatMFP1         | CHEMBL110948  |          | 0.913043   | 125.89   |       | *  |
| MFP1             | CHEMBL111352  |          | 0.600000   | 69.18    |       | *  |
| RDKit7           | CHEMBL3233412 |          | 0.662634   | 300.00   |       |    |
| Pattern          | CHEMBL333174  |          | 0.822767   | 27.54    |       |    |
| AP_bits          | CHEMBL111352  |          | 0.544393   | 69.18    |       | *  |
| TT_bits          | CHEMBL421801  |          | 0.483516   | 512.86   |       |    |

| FP2           | CHEMBL3233412 | 0.644330 | 300.00 |   |
|---------------|---------------|----------|--------|---|
| hybridization | CHEMBL85      | 0.570016 | 6.40   |   |
| substructure  | CHEMBL155486  | 0.954545 | 104.71 | * |
| graph         | CHEMBL155486  | 0.890756 | 104.71 | * |
| pubchem       | CHEMBL155486  | 0.856383 | 104.71 | * |
| cdk_maccs     | CHEMBL143027  | 0.906250 | 338.84 | * |
| klekota_roth  | CHEMBL163904  | 0.612245 | 71.00  |   |

\*\*\* ki ACTIVITY \*\*\* value prediction  
based on 7 locally validated fgps ---> 193.629  
["substructure", "AP\_bits", "MFP1", "pubchem", "graph", "FeatMFP1",  
"cdk\_maccs"]

7 rank

Dopamine D1 receptor : Rattus norvegicus

score: 3.900 on CHEMBL265 based on 5 fingerprints

| Fingerprint type | Ligand       | Tanimoto | Similarity | activity | Valid fg |
|------------------|--------------|----------|------------|----------|----------|
| FeatMFP1         | CHEMBL143027 | 0.913043 | 28.8400    |          | *        |
| MFP1             | CHEMBL541842 | 0.600000 | 134.9000   |          | *        |
| RDKit7           | CHEMBL539544 | 0.616715 | 128.8200   |          |          |
| Pattern          | CHEMBL393466 | 0.773533 | 0.6427     |          |          |
| AP_bits          | CHEMBL151475 | 0.567227 | 239.0000   |          | *        |
| TT_bits          | CHEMBL541842 | 0.454545 | 134.9000   |          |          |
| FP2              | CHEMBL541842 | 0.536585 | 134.9000   |          |          |
| hybridization    | CHEMBL85     | 0.570016 | 22.0000    |          |          |
| substructure     | CHEMBL143027 | 0.913043 | 28.8400    |          | *        |
| graph            | CHEMBL143027 | 0.727891 | 28.8400    |          |          |
| pubchem          | CHEMBL85     | 0.845361 | 22.0000    |          |          |
| cdk_maccs        | CHEMBL143027 | 0.906250 | 28.8400    |          | *        |
| klekota_roth     | CHEMBL85     | 0.554545 | 22.0000    |          |          |

\*\*\* ki ACTIVITY \*\*\* value prediction

based on 5 locally validated fgps ---> 112.249

["FeatMFP1", "AP\_bits", "MFP1", "substructure", "cdk\_maccs"]

8 rank

Dopamine D3 receptor : Homo sapiens

score: 3.232 on CHEMBL234 based on 4 fingerprints

| Fingerprint type | Ligand        | Tanimoto | Similarity | activity | Valid fg |
|------------------|---------------|----------|------------|----------|----------|
| FeatMFP1         | CHEMBL572708  | 0.875000 | 281.84     |          | *        |
| MFP1             | CHEMBL1258036 | 0.585366 | 9.90       |          |          |
| RDKit7           | CHEMBL572708  | 0.603026 | 281.84     |          |          |
| Pattern          | CHEMBL3676930 | 0.788839 | 145.21     |          |          |
| AP_bits          | CHEMBL151475  | 0.567227 | 5.40       |          | *        |
| TT_bits          | CHEMBL566508  | 0.442105 | 44.67      |          |          |
| FP2              | CHEMBL572708  | 0.579208 | 281.84     |          |          |
| hybridization    | CHEMBL85      | 0.570016 | 6.70       |          |          |
| substructure     | CHEMBL572708  | 0.913043 | 281.84     |          | *        |
| graph            | CHEMBL572708  | 0.744828 | 281.84     |          |          |
| pubchem          | CHEMBL85      | 0.845361 | 6.70       |          |          |
| cdk_maccs        | CHEMBL572708  | 0.876923 | 281.84     |          | *        |
| klekota_roth     | CHEMBL1256170 | 0.583333 | 4.20       |          |          |

\*\*\* ki ACTIVITY \*\*\* value prediction

based on 4 locally validated fgps ---> 168.147

["FeatMFP1", "AP\_bits", "substructure", "cdk\_maccs"]

9 rank

Serotonin 1a (5-HT1a) receptor : Homo sapiens

score: 3.096 on CHEMBL214 based on 4 fingerprints

| Fingerprint type | Ligand       | Tanimoto | Similarity | activity | Valid fg |
|------------------|--------------|----------|------------|----------|----------|
| FeatMFP1         | CHEMBL246484 | 0.777778 | 1513.56    |          | *        |
| MFP1             | CHEMBL85     | 0.583333 | 21.00      |          |          |

|               |               |          |         |   |
|---------------|---------------|----------|---------|---|
| RDKit7        | CHEMBL3233412 | 0.662634 | 364.00  |   |
| Pattern       | CHEMBL3233412 | 0.797844 | 364.00  |   |
| AP_bits       | CHEMBL1774085 | 0.530992 | 1.20    | * |
| TT_bits       | CHEMBL246484  | 0.434783 | 1513.56 |   |
| FP2           | CHEMBL3233412 | 0.644330 | 364.00  |   |
| hybridization | CHEMBL85      | 0.570016 | 21.00   |   |
| substructure  | CHEMBL445651  | 0.913043 | 160.00  | * |
| graph         | CHEMBL445651  | 0.780303 | 160.00  |   |
| pubchem       | CHEMBL445651  | 0.874346 | 160.00  | * |
| cdk_maccs     | CHEMBL246484  | 0.826087 | 1513.56 |   |
| klekota_roth  | CHEMBL3233427 | 0.578431 | 206.00  |   |

\*\*\* ki ACTIVITY \*\*\* value prediction  
based on 4 locally validated fgps ---> 436.758  
["FeatMFP1", "AP\_bits", "substructure", "pubchem"]

# SwissTargetPrediction report:

## Reference:

Gfeller D., Michielin O. & Zoete V.  
Shaping the interaction landscape of  
bioactive molecules, *Bioinformatics*  
(2013) 29:3073-3079.

## Query Molecule

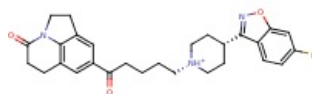

## Frequency of Target Class

| Target                                           | Uniprot ID | Gene code | ChEMBL ID  | Probability            | # sim. cmpds (3D / 2D) | Target Class      |
|--------------------------------------------------|------------|-----------|------------|------------------------|------------------------|-------------------|
| Cholinesterase                                   | P06276     | BCHE      | CHEMBL1914 | <div><div></div></div> | 187 / 68               | Enzyme            |
| Acetylcholinesterase                             | P22303     | ACHE      | CHEMBL220  | <div><div></div></div> | 187 / 68               | Enzyme            |
| D(2) dopamine receptor                           | P14416     | DRD2      | CHEMBL217  | <div><div></div></div> | 1056 / 139             | Membrane receptor |
| 5-hydroxytryptamine receptor 2A                  | P28223     | HTR2A     | CHEMBL224  | <div><div></div></div> | 385 / 47               | Membrane receptor |
| D(3) dopamine receptor (by homology)             | P35462     | DRD3      | CHEMBL234  | <div><div></div></div> | 654 / 68               | Membrane receptor |
| 5-hydroxytryptamine receptor 1A                  | P08908     | HTR1A     | CHEMBL214  | <div><div></div></div> | 420 / 19               | Membrane receptor |
| 5-hydroxytryptamine receptor 2C (by homology)    | P28335     | HTR2C     | CHEMBL225  | <div><div></div></div> | 279 / 27               | Membrane receptor |
| 5-hydroxytryptamine receptor 2B (by homology)    | P41595     | HTR2B     | CHEMBL1833 | <div><div></div></div> | 279 / 27               | Membrane receptor |
| 5-hydroxytryptamine receptor 1B (by homology)    | P28222     | HTR1B     | CHEMBL1898 | <div><div></div></div> | 423 / 18               | Membrane receptor |
| D(1A) dopamine receptor                          | P21728     | DRD1      | CHEMBL2056 | <div><div></div></div> | 59 / 6                 | Membrane receptor |
| 5-hydroxytryptamine receptor 1D                  | P28221     | HTR1D     | CHEMBL1983 | <div><div></div></div> | 172 / 10               | Membrane receptor |
| 5-hydroxytryptamine receptor 1E (by homology)    | P28566     | HTR1E     | CHEMBL2182 | <div><div></div></div> | 152 / 10               | Membrane receptor |
| 5-hydroxytryptamine receptor 1F                  | P30939     | HTR1F     | CHEMBL1805 | <div><div></div></div> | 152 / 10               | Membrane receptor |
| D(4) dopamine receptor                           | P21917     | DRD4      | CHEMBL219  | <div><div></div></div> | 429 / 30               | Membrane receptor |
| Mitogen-activated protein kinase 8 (by homology) | P45983     | MAPK8     | CHEMBL2276 | <div><div></div></div> | 74 / 26                | Ser_Thr Kinase    |

# Polypharmacology Browser 2 Prediction:

Targets predicted using NN(ECfp4) + NB(ECfp4).

Save Table

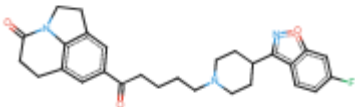

Query molecule

Target class overview

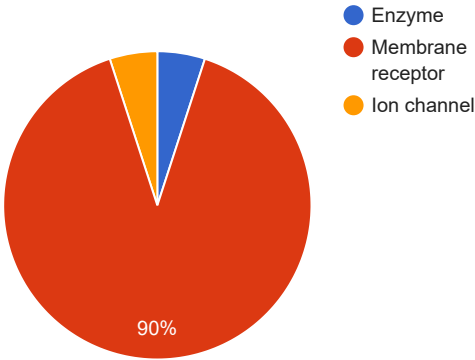

| Rank | ChEMBL ID                                                                                                                                  | Common name                    | Nearest neighbours |
|------|--------------------------------------------------------------------------------------------------------------------------------------------|--------------------------------|--------------------|
| 1    | CHEMBL224 ( <a href="https://www.ebi.ac.uk/chembl/target/inspect/CHEMBL224">https://www.ebi.ac.uk/chembl/target/inspect/CHEMBL224</a> )    | Serotonin 2a (5-HT2a) receptor | Show NN            |
| 2    | CHEMBL217 ( <a href="https://www.ebi.ac.uk/chembl/target/inspect/CHEMBL217">https://www.ebi.ac.uk/chembl/target/inspect/CHEMBL217</a> )    | Dopamine D2 receptor           | Show NN            |
| 3    | CHEMBL339 ( <a href="https://www.ebi.ac.uk/chembl/target/inspect/CHEMBL339">https://www.ebi.ac.uk/chembl/target/inspect/CHEMBL339</a> )    | Dopamine D2 receptor           | Show NN            |
| 4    | CHEMBL322 ( <a href="https://www.ebi.ac.uk/chembl/target/inspect/CHEMBL322">https://www.ebi.ac.uk/chembl/target/inspect/CHEMBL322</a> )    | Serotonin 2a (5-HT2a) receptor | Show NN            |
| 5    | CHEMBL3371 ( <a href="https://www.ebi.ac.uk/chembl/target/inspect/CHEMBL3371">https://www.ebi.ac.uk/chembl/target/inspect/CHEMBL3371</a> ) | Serotonin 6 (5-HT6) receptor   | Show NN            |
| 6    | CHEMBL273 ( <a href="https://www.ebi.ac.uk/chembl/target/inspect/CHEMBL273">https://www.ebi.ac.uk/chembl/target/inspect/CHEMBL273</a> )    | Serotonin 1a (5-HT1a) receptor | Show NN            |
| 7    | CHEMBL225 ( <a href="https://www.ebi.ac.uk/chembl/target/inspect/CHEMBL225">https://www.ebi.ac.uk/chembl/target/inspect/CHEMBL225</a> )    | Serotonin 2c (5-HT2c) receptor | Show NN            |
| 8    | CHEMBL240 ( <a href="https://www.ebi.ac.uk/chembl/target/inspect/CHEMBL240">https://www.ebi.ac.uk/chembl/target/inspect/CHEMBL240</a> )    | HERG                           | Show NN            |
| 9    | CHEMBL234 ( <a href="https://www.ebi.ac.uk/chembl/target/inspect/CHEMBL234">https://www.ebi.ac.uk/chembl/target/inspect/CHEMBL234</a> )    | Dopamine D3 receptor           | Show NN            |
| 10   | CHEMBL3155 ( <a href="https://www.ebi.ac.uk/chembl/target/inspect/CHEMBL3155">https://www.ebi.ac.uk/chembl/target/inspect/CHEMBL3155</a> ) | Serotonin 7 (5-HT7) receptor   | Show NN            |
| 11   | CHEMBL3138 ( <a href="https://www.ebi.ac.uk/chembl/target/inspect/CHEMBL3138">https://www.ebi.ac.uk/chembl/target/inspect/CHEMBL3138</a> ) | Dopamine D3 receptor           | Show NN            |
| 12   | CHEMBL231 ( <a href="https://www.ebi.ac.uk/chembl/target/inspect/CHEMBL231">https://www.ebi.ac.uk/chembl/target/inspect/CHEMBL231</a> )    | Histamine H1 receptor          | Show NN            |
| 13   | CHEMBL265 ( <a href="https://www.ebi.ac.uk/chembl/target/inspect/CHEMBL265">https://www.ebi.ac.uk/chembl/target/inspect/CHEMBL265</a> )    | Dopamine D1 receptor           | Show NN            |
| 14   | CHEMBL219 ( <a href="https://www.ebi.ac.uk/chembl/target/inspect/CHEMBL219">https://www.ebi.ac.uk/chembl/target/inspect/CHEMBL219</a> )    | Dopamine D4 receptor           | Show NN            |
| 15   | CHEMBL2056 ( <a href="https://www.ebi.ac.uk/chembl/target/inspect/CHEMBL2056">https://www.ebi.ac.uk/chembl/target/inspect/CHEMBL2056</a> ) | Dopamine D1 receptor           | Show NN            |
| 16   | CHEMBL324 ( <a href="https://www.ebi.ac.uk/chembl/target/inspect/CHEMBL324">https://www.ebi.ac.uk/chembl/target/inspect/CHEMBL324</a> )    | Serotonin 2c (5-HT2c) receptor | Show NN            |
| 17   | CHEMBL287 ( <a href="https://www.ebi.ac.uk/chembl/target/inspect/CHEMBL287">https://www.ebi.ac.uk/chembl/target/inspect/CHEMBL287</a> )    | Sigma opioid receptor          | Show NN            |
| 18   | CHEMBL214 ( <a href="https://www.ebi.ac.uk/chembl/target/inspect/CHEMBL214">https://www.ebi.ac.uk/chembl/target/inspect/CHEMBL214</a> )    | Serotonin 1a (5-HT1a) receptor | Show NN            |

|    |                                                                                                                                         |                              |         |
|----|-----------------------------------------------------------------------------------------------------------------------------------------|------------------------------|---------|
| 19 | CHEMBL319 ( <a href="https://www.ebi.ac.uk/chembl/target/inspect/CHEMBL319">https://www.ebi.ac.uk/chembl/target/inspect/CHEMBL319</a> ) | Alpha-1a adrenergic receptor | Show NN |
| 20 | CHEMBL220 ( <a href="https://www.ebi.ac.uk/chembl/target/inspect/CHEMBL220">https://www.ebi.ac.uk/chembl/target/inspect/CHEMBL220</a> ) | Acetylcholinesterase         | Show NN |
