# Supplementary material for: Accelerating Drug Discovery by Early Protein Drug Target Prediction Based on a Multi-Fingerprint Similarity Search
Source: MDPI journal article supplement (doi:10.3390/molecules24122233), 2019-06-14
Supplement: s1 [file s1]

**MuSSel not predicted**

# SwissTargetPrediction report:

## Reference:

Gfeller D., Michielin O. & Zoete V.  
 Shaping the interaction landscape of  
 bioactive molecules, *Bioinformatics*  
 (2013) 29:3073-3079.

## Query Molecule

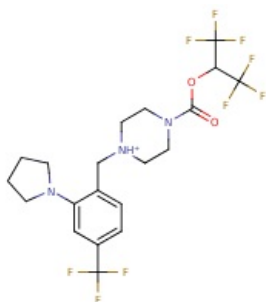

## Frequency of Target Class

| Target                                                                                               | Uniprot ID | Gene code | ChEMBL ID     | Probability            | # sim. cmpds (3D / 2D) | Target Class      |
|------------------------------------------------------------------------------------------------------|------------|-----------|---------------|------------------------|------------------------|-------------------|
| Microtubule-associated protein tau                                                                   | P10636     | MAPT      | CHEMBL1293224 | <div><div></div></div> | 15 / 16                | Unclassified      |
| Muscleblind-like protein 1                                                                           | Q9NR56     | MBNL1     | CHEMBL1293317 | <div><div></div></div> | 16 / 27                | Unclassified      |
| Muscleblind-like protein 2 ( <i>by homology</i> )                                                    | Q5VZF2     | MBNL2     |               | <div><div></div></div> | 16 / 27                | Unclassified      |
| Muscleblind-like protein 3 ( <i>by homology</i> )                                                    | Q9NUK0     | MBNL3     |               | <div><div></div></div> | 16 / 27                | Unclassified      |
| Sodium- and chloride-dependent glycine transporter 1                                                 | P48067     | SLC6A9    | CHEMBL2337    | <div><div></div></div> | 6 / 34                 | Transporter       |
| Sodium- and chloride-dependent glycine transporter 2                                                 | Q9Y345     | SLC6A5    | CHEMBL3060    | <div><div></div></div> | 6 / 34                 | Transporter       |
| Sodium-dependent proline transporter ( <i>by homology</i> )                                          | Q99884     | SLC6A7    |               | <div><div></div></div> | 6 / 34                 | Transporter       |
| Sodium- and chloride-dependent neutral and basic amino acid transporter B(0+) ( <i>by homology</i> ) | Q9UN76     | SLC6A14   |               | <div><div></div></div> | 6 / 34                 | Transporter       |
| Tyrosyl-DNA phosphodiesterase 1                                                                      | Q9NUW8     | TDP1      | CHEMBL1075138 | <div><div></div></div> | 4 / 3                  | Enzyme            |
| Caspase-3 subunit p12                                                                                | P42574     | CASP3     | CHEMBL2334    | <div><div></div></div> | 5 / 2                  | Cysteine Protease |
| Caspase-7 subunit p20                                                                                | P55210     | CASP7     | CHEMBL3468    | <div><div></div></div> | 5 / 2                  | Cysteine Protease |
| Caspase-6 subunit p18                                                                                | P55212     | CASP6     | CHEMBL3308    | <div><div></div></div> | 5 / 2                  | Cysteine Protease |
| Transient receptor potential cation channel subfamily V member 1                                     | Q8NER1     | TRPV1     | CHEMBL4794    | <div><div></div></div> | 33 / 1                 | Ion channel       |
| Cannabinoid receptor 1                                                                               | P21554     | CNR1      | CHEMBL218     | <div><div></div></div> | 11 / 5                 | Membrane receptor |
| D(2) dopamine receptor ( <i>by homology</i> )                                                        | P14416     | DRD2      | CHEMBL217     | <div><div></div></div> | 4 / 25                 | Membrane receptor |

# Polypharmacology Browser 2 Prediction:

Targets predicted using NN(ECfp4) + NB(ECfp4).

Save Table

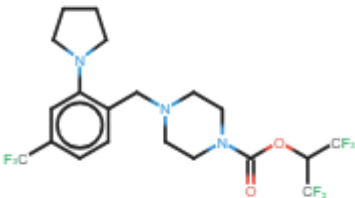

Query molecule

Target class overview

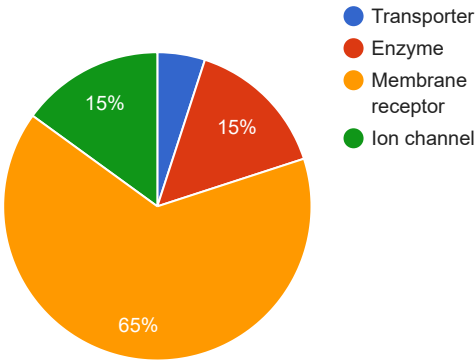

| Rank | ChEMBL ID                                                                                                                                  | Common name                              | Nearest neighbours |
|------|--------------------------------------------------------------------------------------------------------------------------------------------|------------------------------------------|--------------------|
| 1    | CHEMBL4794 ( <a href="https://www.ebi.ac.uk/chembl/target/inspect/CHEMBL4794">https://www.ebi.ac.uk/chembl/target/inspect/CHEMBL4794</a> ) | Vanilloid receptor                       | Show NN            |
| 2    | CHEMBL240 ( <a href="https://www.ebi.ac.uk/chembl/target/inspect/CHEMBL240">https://www.ebi.ac.uk/chembl/target/inspect/CHEMBL240</a> )    | HERG                                     | Show NN            |
| 3    | CHEMBL218 ( <a href="https://www.ebi.ac.uk/chembl/target/inspect/CHEMBL218">https://www.ebi.ac.uk/chembl/target/inspect/CHEMBL218</a> )    | Cannabinoid CB1 receptor                 | Show NN            |
| 4    | CHEMBL3229 ( <a href="https://www.ebi.ac.uk/chembl/target/inspect/CHEMBL3229">https://www.ebi.ac.uk/chembl/target/inspect/CHEMBL3229</a> ) | Anandamide amidohydrolase                | Show NN            |
| 5    | CHEMBL249 ( <a href="https://www.ebi.ac.uk/chembl/target/inspect/CHEMBL249">https://www.ebi.ac.uk/chembl/target/inspect/CHEMBL249</a> )    | Neurokinin 1 receptor                    | Show NN            |
| 6    | CHEMBL253 ( <a href="https://www.ebi.ac.uk/chembl/target/inspect/CHEMBL253">https://www.ebi.ac.uk/chembl/target/inspect/CHEMBL253</a> )    | Cannabinoid CB2 receptor                 | Show NN            |
| 7    | CHEMBL273 ( <a href="https://www.ebi.ac.uk/chembl/target/inspect/CHEMBL273">https://www.ebi.ac.uk/chembl/target/inspect/CHEMBL273</a> )    | Serotonin 1a (5-HT1a) receptor           | Show NN            |
| 8    | CHEMBL284 ( <a href="https://www.ebi.ac.uk/chembl/target/inspect/CHEMBL284">https://www.ebi.ac.uk/chembl/target/inspect/CHEMBL284</a> )    | Dipeptidyl peptidase IV                  | Show NN            |
| 9    | CHEMBL264 ( <a href="https://www.ebi.ac.uk/chembl/target/inspect/CHEMBL264">https://www.ebi.ac.uk/chembl/target/inspect/CHEMBL264</a> )    | Histamine H3 receptor                    | Show NN            |
| 10   | CHEMBL344 ( <a href="https://www.ebi.ac.uk/chembl/target/inspect/CHEMBL344">https://www.ebi.ac.uk/chembl/target/inspect/CHEMBL344</a> )    | Melanin-concentrating hormone receptor 1 | Show NN            |
| 11   | CHEMBL259 ( <a href="https://www.ebi.ac.uk/chembl/target/inspect/CHEMBL259">https://www.ebi.ac.uk/chembl/target/inspect/CHEMBL259</a> )    | Melanocortin receptor 4                  | Show NN            |
| 12   | CHEMBL3572 ( <a href="https://www.ebi.ac.uk/chembl/target/inspect/CHEMBL3572">https://www.ebi.ac.uk/chembl/target/inspect/CHEMBL3572</a> ) | Cholesteryl ester transfer protein       | Show NN            |
| 13   | CHEMBL2337 ( <a href="https://www.ebi.ac.uk/chembl/target/inspect/CHEMBL2337">https://www.ebi.ac.uk/chembl/target/inspect/CHEMBL2337</a> ) | Glycine transporter 1                    | Show NN            |
| 14   | CHEMBL339 ( <a href="https://www.ebi.ac.uk/chembl/target/inspect/CHEMBL339">https://www.ebi.ac.uk/chembl/target/inspect/CHEMBL339</a> )    | Dopamine D2 receptor                     | Show NN            |
| 15   | CHEMBL340 ( <a href="https://www.ebi.ac.uk/chembl/target/inspect/CHEMBL340">https://www.ebi.ac.uk/chembl/target/inspect/CHEMBL340</a> )    | Cytochrome P450 3A4                      | Show NN            |
| 16   | CHEMBL4018 ( <a href="https://www.ebi.ac.uk/chembl/target/inspect/CHEMBL4018">https://www.ebi.ac.uk/chembl/target/inspect/CHEMBL4018</a> ) | Neuropeptide Y receptor type 2           | Show NN            |
| 17   | CHEMBL217 ( <a href="https://www.ebi.ac.uk/chembl/target/inspect/CHEMBL217">https://www.ebi.ac.uk/chembl/target/inspect/CHEMBL217</a> )    | Dopamine D2 receptor                     | Show NN            |
| 18   | CHEMBL224 ( <a href="https://www.ebi.ac.uk/chembl/target/inspect/CHEMBL224">https://www.ebi.ac.uk/chembl/target/inspect/CHEMBL224</a> )    | Serotonin 2a (5-HT2a) receptor           | Show NN            |

|    |                                                                                                                                            |                                |                         |
|----|--------------------------------------------------------------------------------------------------------------------------------------------|--------------------------------|-------------------------|
| 19 | CHEMBL225 ( <a href="https://www.ebi.ac.uk/chembl/target/inspect/CHEMBL225">https://www.ebi.ac.uk/chembl/target/inspect/CHEMBL225</a> )    | Serotonin 2c (5-HT2c) receptor | <a href="#">Show NN</a> |
| 20 | CHEMBL5071 ( <a href="https://www.ebi.ac.uk/chembl/target/inspect/CHEMBL5071">https://www.ebi.ac.uk/chembl/target/inspect/CHEMBL5071</a> ) | G protein-coupled receptor 44  | <a href="#">Show NN</a> |
