# Supplementary material for: Accelerating Drug Discovery by Early Protein Drug Target Prediction Based on a Multi-Fingerprint Similarity Search
Source: MDPI journal article supplement (doi:10.3390/molecules24122233), 2019-06-14
Supplement: s1 [file s1]

## MuSSEL Prediction IC<sub>50</sub>:

1 rank

Acetylcholinesterase : Electrophorus electricus

score: 6.335 on ChEMBL4078 based on 9 fingerprints

| Fingerprint type | Ligand        | Tanimoto | Similarity | activity | Valid fg |
|------------------|---------------|----------|------------|----------|----------|
| FeatMFP1         | ChEMBL470867  |          | 0.727273   | 330.00   | *        |
| MFP1             | ChEMBL470867  |          | 0.575758   | 330.00   | *        |
| RDKit7           | ChEMBL258893  |          | 0.596059   | 3780.00  |          |
| Pattern          | ChEMBL258893  |          | 0.893987   | 3780.00  | *        |
| AP_bits          | ChEMBL1270850 |          | 0.610592   | 1800.00  | *        |
| TT_bits          | ChEMBL258893  |          | 0.590909   | 3780.00  | *        |
| FP2              | ChEMBL258893  |          | 0.640449   | 3780.00  | *        |
| hybridization    | ChEMBL258893  |          | 0.661157   | 3780.00  | *        |
| substructure     | ChEMBL3793762 |          | 0.842105   | 465.96   |          |
| graph            | ChEMBL3819248 |          | 0.814159   | 131.00   | *        |
| pubchem          | ChEMBL374981  |          | 0.819512   | 2.73     |          |
| cdk_maccs        | ChEMBL1271342 |          | 0.820896   | 1740.00  | *        |
| klekota_roth     | ChEMBL1271342 |          | 0.563380   | 1740.00  |          |

\*\*\* ic50 ACTIVITY \*\*\* value prediction

based on 9 locally validated fgps ---> 2034.977

["TT\_bits", "Pattern", "AP\_bits", "MFP1", "graph", "FP2", "FeatMFP1", "cdk\_maccs", "hybridization"]

2 rank

Acetylcholinesterase : Homo sapiens

score: 5.542 on ChEMBL220 based on 8 fingerprints

| Fingerprint type | Ligand        | Tanimoto | Similarity | activity | Valid fg |
|------------------|---------------|----------|------------|----------|----------|
| FeatMFP1         | ChEMBL470867  |          | 0.727273   | 540.00   | *        |
| MFP1             | ChEMBL507903  |          | 0.588235   | 7.70     | *        |
| RDKit7           | ChEMBL258893  |          | 0.596059   | 1540.00  |          |
| Pattern          | ChEMBL258893  |          | 0.893987   | 1540.00  | *        |
| AP_bits          | ChEMBL12089   |          | 0.603226   | 40.00    | *        |
| TT_bits          | ChEMBL258893  |          | 0.590909   | 1540.00  | *        |
| FP2              | ChEMBL258893  |          | 0.640449   | 1540.00  | *        |
| hybridization    | ChEMBL258893  |          | 0.661157   | 1540.00  | *        |
| substructure     | ChEMBL3335056 |          | 0.842105   | 6700.00  |          |
| graph            | ChEMBL3233992 |          | 0.836364   | 61400.00 | *        |
| pubchem          | ChEMBL374981  |          | 0.819512   | 5.08     |          |
| cdk_maccs        | ChEMBL3407582 |          | 0.780822   | 8400.00  |          |
| klekota_roth     | ChEMBL491526  |          | 0.560000   | 2370.00  |          |

\*\*\* ic50 ACTIVITY \*\*\* value prediction

based on 8 locally validated fgps ---> 8912.199

["TT\_bits", "Pattern", "AP\_bits", "MFP1", "graph", "FP2", "FeatMFP1", "hybridization"]

3 rank

Reverse transcriptase : Human immunodeficiency virus 1

score: 4.855 on ChEMBL2366516 based on 7 fingerprints

| Fingerprint type | Ligand        | Tanimoto | Similarity | activity | Valid fg |
|------------------|---------------|----------|------------|----------|----------|
| FeatMFP1         | ChEMBL485509  |          | 0.482759   | 4677.35  |          |
| MFP1             | ChEMBL292540  |          | 0.529412   | 5500.00  | *        |
| RDKit7           | ChEMBL8443    |          | 0.650138   | 49.00    |          |
| Pattern          | ChEMBL8443    |          | 0.887122   | 49.00    | *        |
| AP_bits          | ChEMBL8443    |          | 0.596215   | 49.00    | *        |
| TT_bits          | ChEMBL8443    |          | 0.645161   | 49.00    | *        |
| FP2              | ChEMBL8443    |          | 0.678571   | 49.00    | *        |
| hybridization    | ChEMBL8443    |          | 0.709821   | 49.00    | *        |
| substructure     | ChEMBL292540  |          | 0.684211   | 5500.00  |          |
| graph            | ChEMBL8443    |          | 0.809091   | 49.00    | *        |
| pubchem          | ChEMBL2407273 |          | 0.737374   | 3850.00  |          |
| cdk_maccs        | ChEMBL3338519 |          | 0.698630   | 25770.00 |          |

klekota\_roth CHEMBL3338519 0.412500 25770.00  
 \*\*\* ic50 ACTIVITY \*\*\* value prediction  
 based on 7 locally validated fgps ---> 1454.398  
 ["TT\_bits", "Pattern", "AP\_bits", "MFP1", "graph", "FP2",  
 "hybridization"]

4 rank

Cholinesterase : Equus caballus

score: 4.739 on CHEMBL5763 based on 7 fingerprints

| Fingerprint type | Ligand        | Tanimoto | Similarity | activity | Valid fg |
|------------------|---------------|----------|------------|----------|----------|
| FeatMFP1         | CHEMBL3323054 |          | 0.666667   | 5220.0   |          |
| MFP1             | CHEMBL1186488 |          | 0.531250   | 19340.0  | *        |
| RDKit7           | CHEMBL258893  |          | 0.596059   | 6330.0   |          |
| Pattern          | CHEMBL258893  |          | 0.893987   | 6330.0   | *        |
| AP_bits          | CHEMBL12089   |          | 0.603226   | 18200.0  | *        |
| TT_bits          | CHEMBL258893  |          | 0.590909   | 6330.0   | *        |
| FP2              | CHEMBL258893  |          | 0.640449   | 6330.0   | *        |
| hybridization    | CHEMBL258893  |          | 0.661157   | 6330.0   | *        |
| substructure     | CHEMBL2323351 |          | 0.833333   | 71700.0  |          |
| graph            | CHEMBL3819247 |          | 0.818182   | 9820.0   | *        |
| pubchem          | CHEMBL3819248 |          | 0.819095   | 4249.0   |          |
| cdk_maccs        | CHEMBL1164080 |          | 0.782609   | 1310.0   |          |
| klekota_roth     | CHEMBL1186488 |          | 0.565217   | 19340.0  |          |

\*\*\* ic50 ACTIVITY \*\*\* value prediction  
 based on 7 locally validated fgps ---> 10339.888  
 ["TT\_bits", "Pattern", "AP\_bits", "MFP1", "graph", "FP2",  
 "hybridization"]

5 rank

Butyrylcholinesterase : Homo sapiens

score: 4.674 on CHEMBL1914 based on 7 fingerprints

| Fingerprint type | Ligand        | Tanimoto | Similarity | activity | Valid fg |
|------------------|---------------|----------|------------|----------|----------|
| FeatMFP1         | CHEMBL3335057 |          | 0.695652   | 33200.00 | *        |
| MFP1             | CHEMBL507903  |          | 0.588235   | 3000.00  | *        |
| RDKit7           | CHEMBL258893  |          | 0.596059   | 10340.00 |          |
| Pattern          | CHEMBL258893  |          | 0.893987   | 10340.00 | *        |
| AP_bits          | CHEMBL12089   |          | 0.603226   | 18970.00 | *        |
| TT_bits          | CHEMBL258893  |          | 0.590909   | 10340.00 | *        |
| FP2              | CHEMBL258893  |          | 0.640449   | 10340.00 | *        |
| hybridization    | CHEMBL258893  |          | 0.661157   | 10340.00 | *        |
| substructure     | CHEMBL3335056 |          | 0.842105   | 14100.00 |          |
| graph            | CHEMBL12089   |          | 0.747899   | 18970.00 |          |
| pubchem          | CHEMBL374981  |          | 0.819512   | 1.38     |          |
| cdk_maccs        | CHEMBL3407582 |          | 0.780822   | 5900.00  |          |
| klekota_roth     | CHEMBL491526  |          | 0.560000   | 88800.00 |          |

\*\*\* ic50 ACTIVITY \*\*\* value prediction  
 based on 7 locally validated fgps ---> 10781.231  
 ["TT\_bits", "Pattern", "AP\_bits", "MFP1", "FP2", "FeatMFP1",  
 "hybridization"]

# SwissTargetPrediction report:

## Reference:

Gfeller D., Michielin O. & Zoete V.  
 Shaping the interaction landscape of  
 bioactive molecules, *Bioinformatics*  
 (2013) 29:3073-3079.

## Query Molecule

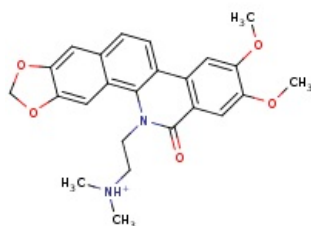

## Frequency of Target Class

| Target                                           | Uniprot ID | Gene code | ChEMBL ID  | Probability            | # sim. cmpds (3D / 2D) | Target Class      |
|--------------------------------------------------|------------|-----------|------------|------------------------|------------------------|-------------------|
| DNA topoisomerase 1                              | P11387     | TOP1      | CHEMBL1781 | <div><div></div></div> | 21 / 15                | Enzyme            |
| DNA topoisomerase I, mitochondrial (by homology) | Q969P6     | TOP1MT    |            | <div><div></div></div> | 21 / 15                | Enzyme            |
| Cyclin-dependent kinase 1                        | P06493     | CDK1      | CHEMBL308  | <div><div></div></div> | 226 / 5                | Ser_Thr Kinase    |
| Cyclin-dependent kinase 4                        | P11802     | CDK4      | CHEMBL331  | <div><div></div></div> | 221 / 5                | Ser_Thr Kinase    |
| Cyclin-dependent kinase 2                        | P24941     | CDK2      | CHEMBL301  | <div><div></div></div> | 226 / 5                | Ser_Thr Kinase    |
| Cyclin-dependent kinase 3 (by homology)          | Q00526     | CDK3      | CHEMBL4442 | <div><div></div></div> | 226 / 5                | Ser_Thr Kinase    |
| Cyclin-dependent kinase 6 (by homology)          | Q00534     | CDK6      | CHEMBL2508 | <div><div></div></div> | 221 / 5                | Ser_Thr Kinase    |
| Aurora kinase A                                  | O14965     | AURKA     | CHEMBL4722 | <div><div></div></div> | 201 / 2                | Ser_Thr Kinase    |
| Aurora kinase B (by homology)                    | Q96GD4     | AURKB     | CHEMBL2185 | <div><div></div></div> | 201 / 2                | Ser_Thr Kinase    |
| Aurora kinase C (by homology)                    | Q9UQB9     | AURKC     | CHEMBL3935 | <div><div></div></div> | 201 / 2                | Ser_Thr Kinase    |
| Cholinesterase                                   | P06276     | BCHE      | CHEMBL1914 | <div><div></div></div> | 124 / 7                | Enzyme            |
| Acetylcholinesterase                             | P22303     | ACHE      | CHEMBL220  | <div><div></div></div> | 124 / 7                | Enzyme            |
| Cytochrome P450 19A1                             | P11511     | CYP19A1   | CHEMBL1978 | <div><div></div></div> | 31 / 10                | Enzyme            |
| Adenosine receptor A1 (by homology)              | P30542     | ADORA1    | CHEMBL226  | <div><div></div></div> | 170 / 1                | Membrane receptor |
| Protein kinase C eta type                        | P24723     | PRKCH     | CHEMBL3616 | <div><div></div></div> | 60 / 2                 | Ser_Thr Kinase    |

# Polypharmacology Browser 2 Prediction:

Targets predicted using NN(ECfp4) + NB(ECfp4).

Save Table

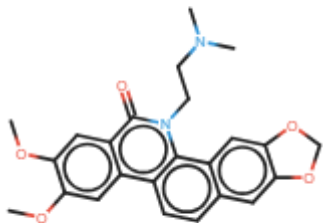

Query molecule

Target class overview

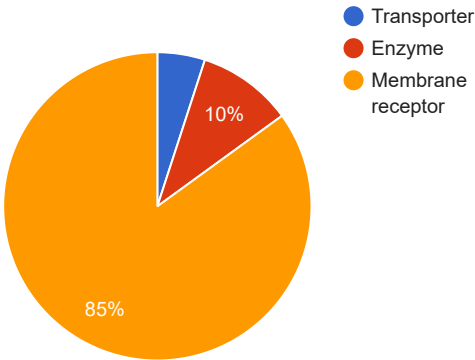

| Rank | ChEMBL ID                                                                                                                                  | Common name                    | Nearest neighbours |
|------|--------------------------------------------------------------------------------------------------------------------------------------------|--------------------------------|--------------------|
| 1    | CHEMBL214 ( <a href="https://www.ebi.ac.uk/chembl/target/inspect/CHEMBL214">https://www.ebi.ac.uk/chembl/target/inspect/CHEMBL214</a> )    | Serotonin 1a (5-HT1a) receptor | Show NN            |
| 2    | CHEMBL273 ( <a href="https://www.ebi.ac.uk/chembl/target/inspect/CHEMBL273">https://www.ebi.ac.uk/chembl/target/inspect/CHEMBL273</a> )    | Serotonin 1a (5-HT1a) receptor | Show NN            |
| 3    | CHEMBL339 ( <a href="https://www.ebi.ac.uk/chembl/target/inspect/CHEMBL339">https://www.ebi.ac.uk/chembl/target/inspect/CHEMBL339</a> )    | Dopamine D2 receptor           | Show NN            |
| 4    | CHEMBL217 ( <a href="https://www.ebi.ac.uk/chembl/target/inspect/CHEMBL217">https://www.ebi.ac.uk/chembl/target/inspect/CHEMBL217</a> )    | Dopamine D2 receptor           | Show NN            |
| 5    | CHEMBL1827 ( <a href="https://www.ebi.ac.uk/chembl/target/inspect/CHEMBL1827">https://www.ebi.ac.uk/chembl/target/inspect/CHEMBL1827</a> ) | Phosphodiesterase 5A           | Show NN            |
| 6    | CHEMBL253 ( <a href="https://www.ebi.ac.uk/chembl/target/inspect/CHEMBL253">https://www.ebi.ac.uk/chembl/target/inspect/CHEMBL253</a> )    | Cannabinoid CB2 receptor       | Show NN            |
| 7    | CHEMBL319 ( <a href="https://www.ebi.ac.uk/chembl/target/inspect/CHEMBL319">https://www.ebi.ac.uk/chembl/target/inspect/CHEMBL319</a> )    | Alpha-1a adrenergic receptor   | Show NN            |
| 8    | CHEMBL326 ( <a href="https://www.ebi.ac.uk/chembl/target/inspect/CHEMBL326">https://www.ebi.ac.uk/chembl/target/inspect/CHEMBL326</a> )    | Alpha-1d adrenergic receptor   | Show NN            |
| 9    | CHEMBL225 ( <a href="https://www.ebi.ac.uk/chembl/target/inspect/CHEMBL225">https://www.ebi.ac.uk/chembl/target/inspect/CHEMBL225</a> )    | Serotonin 2c (5-HT2c) receptor | Show NN            |
| 10   | CHEMBL224 ( <a href="https://www.ebi.ac.uk/chembl/target/inspect/CHEMBL224">https://www.ebi.ac.uk/chembl/target/inspect/CHEMBL224</a> )    | Serotonin 2a (5-HT2a) receptor | Show NN            |
| 11   | CHEMBL220 ( <a href="https://www.ebi.ac.uk/chembl/target/inspect/CHEMBL220">https://www.ebi.ac.uk/chembl/target/inspect/CHEMBL220</a> )    | Acetylcholinesterase           | Show NN            |
| 12   | CHEMBL2056 ( <a href="https://www.ebi.ac.uk/chembl/target/inspect/CHEMBL2056">https://www.ebi.ac.uk/chembl/target/inspect/CHEMBL2056</a> ) | Dopamine D1 receptor           | Show NN            |
| 13   | CHEMBL4302 ( <a href="https://www.ebi.ac.uk/chembl/target/inspect/CHEMBL4302">https://www.ebi.ac.uk/chembl/target/inspect/CHEMBL4302</a> ) | P-glycoprotein 1               | Show NN            |
| 14   | CHEMBL234 ( <a href="https://www.ebi.ac.uk/chembl/target/inspect/CHEMBL234">https://www.ebi.ac.uk/chembl/target/inspect/CHEMBL234</a> )    | Dopamine D3 receptor           | Show NN            |
| 15   | CHEMBL3155 ( <a href="https://www.ebi.ac.uk/chembl/target/inspect/CHEMBL3155">https://www.ebi.ac.uk/chembl/target/inspect/CHEMBL3155</a> ) | Serotonin 7 (5-HT7) receptor   | Show NN            |
| 16   | CHEMBL232 ( <a href="https://www.ebi.ac.uk/chembl/target/inspect/CHEMBL232">https://www.ebi.ac.uk/chembl/target/inspect/CHEMBL232</a> )    | Alpha-1b adrenergic receptor   | Show NN            |
| 17   | CHEMBL229 ( <a href="https://www.ebi.ac.uk/chembl/target/inspect/CHEMBL229">https://www.ebi.ac.uk/chembl/target/inspect/CHEMBL229</a> )    | Alpha-1a adrenergic receptor   | Show NN            |
| 18   | CHEMBL3371 ( <a href="https://www.ebi.ac.uk/chembl/target/inspect/CHEMBL3371">https://www.ebi.ac.uk/chembl/target/inspect/CHEMBL3371</a> ) | Serotonin 6 (5-HT6) receptor   | Show NN            |

|    |                                                                                                                                         |                              |         |
|----|-----------------------------------------------------------------------------------------------------------------------------------------|------------------------------|---------|
| 19 | CHEMBL287 ( <a href="https://www.ebi.ac.uk/chembl/target/inspect/CHEMBL287">https://www.ebi.ac.uk/chembl/target/inspect/CHEMBL287</a> ) | Sigma opioid receptor        | Show NN |
| 20 | CHEMBL223 ( <a href="https://www.ebi.ac.uk/chembl/target/inspect/CHEMBL223">https://www.ebi.ac.uk/chembl/target/inspect/CHEMBL223</a> ) | Alpha-1d adrenergic receptor | Show NN |
