# Supplementary material for: Accelerating Drug Discovery by Early Protein Drug Target Prediction Based on a Multi-Fingerprint Similarity Search
Source: MDPI journal article supplement (doi:10.3390/molecules24122233), 2019-06-14
Supplement: s1 [file s1]

## MuSSEL Prediction $k_i$ :

1 rank

Protease : Human immunodeficiency virus 1

score: 9.261 on ChEMBL2366517 based on 12 fingerprints

| Fingerprint type | Ligand        | Tanimoto | Similarity | activity | Valid fg |
|------------------|---------------|----------|------------|----------|----------|
| FeatMFP1         | ChEMBL2165884 |          | 0.806452   | 11.390   | *        |
| MFP1             | ChEMBL1276099 |          | 0.625000   | 0.026    | *        |
| RDKit7           | ChEMBL2165897 |          | 0.788600   | 0.303    | *        |
| Pattern          | ChEMBL1276099 |          | 0.875668   | 0.026    | *        |
| AP_bits          | ChEMBL3605642 |          | 0.658711   | 0.012    | *        |
| TT_bits          | ChEMBL1958486 |          | 0.551402   | 0.020    | *        |
| FP2              | ChEMBL2165893 |          | 0.771930   | 0.027    | *        |
| hybridization    | ChEMBL2165887 |          | 0.796502   | 3.375    | *        |
| substructure     | ChEMBL2165898 |          | 0.869565   | 0.230    | *        |
| graph            | ChEMBL2165897 |          | 0.778098   | 0.303    |          |
| pubchem          | ChEMBL2165890 |          | 0.858447   | 0.217    | *        |
| cdk_maccs        | ChEMBL1276099 |          | 0.925532   | 0.026    | *        |
| klekota_roth     | ChEMBL1819298 |          | 0.733333   | 12.500   | *        |

\*\*\* ki ACTIVITY \*\*\* value prediction

based on 12 locally validated fgps ---> 3.045

["TT\_bits", "substructure", "cdk\_maccs", "Pattern", "FP2", "MFP1",  
"klekota\_roth", "pubchem", "AP\_bits", "FeatMFP1", "RDKit7",  
"hybridization"]

2 rank

Human immunodeficiency virus type 1 protease : Human immunodeficiency virus 1

score: 2.811 on ChEMBL243 based on 4 fingerprints

| Fingerprint type | Ligand       | Tanimoto | Similarity | activity | Valid fg |
|------------------|--------------|----------|------------|----------|----------|
| FeatMFP1         | ChEMBL377249 |          | 0.666667   | 5.300    |          |
| MFP1             | ChEMBL213012 |          | 0.620690   | 0.140    | *        |
| RDKit7           | ChEMBL213012 |          | 0.644537   | 0.140    |          |
| Pattern          | ChEMBL330404 |          | 0.827901   | 190.000  |          |
| AP_bits          | ChEMBL220078 |          | 0.606459   | 0.235    | *        |
| TT_bits          | ChEMBL213012 |          | 0.530000   | 0.140    |          |
| FP2              | ChEMBL213012 |          | 0.601732   | 0.140    |          |
| hybridization    | ChEMBL1323   |          | 0.654466   | 0.014    |          |
| substructure     | ChEMBL120843 |          | 0.791667   | 38.000   |          |
| graph            | ChEMBL213012 |          | 0.586301   | 0.140    |          |
| pubchem          | ChEMBL330404 |          | 0.764192   | 190.000  |          |
| cdk_maccs        | ChEMBL219288 |          | 0.873684   | 10.700   | *        |
| klekota_roth     | ChEMBL213012 |          | 0.710345   | 0.140    | *        |

\*\*\* ki ACTIVITY \*\*\* value prediction

based on 4 locally validated fgps ---> 1.971

["AP\_bits", "klekota\_roth", "MFP1", "cdk\_maccs"]

## MuSSEL Prediction IC<sub>50</sub>:

1 rank

Protease : Human immunodeficiency virus 1

score: 5.629 on ChEMBL2366517 based on 8 fingerprints

| Fingerprint type | Ligand        | Tanimoto Similarity | activity | Valid fg |
|------------------|---------------|---------------------|----------|----------|
| FeatMFP1         | ChEMBL2041942 | 0.818182            | 1.5      | *        |
| MFP1             | ChEMBL254349  | 0.620690            | 1.8      | *        |
| RDKit7           | ChEMBL507319  | 0.700464            | 10.0     | *        |
| Pattern          | ChEMBL2041942 | 0.838752            | 1.5      |          |
| AP_bits          | ChEMBL2041942 | 0.681490            | 1.5      | *        |
| TT_bits          | ChEMBL254349  | 0.524752            | 1.8      | *        |
| FP2              | ChEMBL507319  | 0.612903            | 10.0     |          |
| hybridization    | ChEMBL2041942 | 0.685210            | 1.5      | *        |
| substructure     | ChEMBL503571  | 0.760000            | 6.0      |          |
| graph            | ChEMBL507319  | 0.644068            | 10.0     |          |
| pubchem          | ChEMBL163     | 0.707113            | 0.6      |          |
| cdk_maccs        | ChEMBL2041942 | 0.885417            | 1.5      | *        |
| klekota_roth     | ChEMBL509137  | 0.713287            | 3.8      | *        |

\*\*\* ic50 ACTIVITY \*\*\* value prediction

based on 8 locally validated fgps ---> 5.079

["TT\_bits", "cdk\_maccs", "AP\_bits", "MFP1", "klekota\_roth", "FeatMFP1", "RDKit7", "hybridization"]

# SwissTargetPrediction report:

## Reference:

Gfeller D., Michielin O. & Zoete V.  
Shaping the interaction landscape of  
bioactive molecules, *Bioinformatics*  
(2013) 29:3073-3079.

## Query Molecule

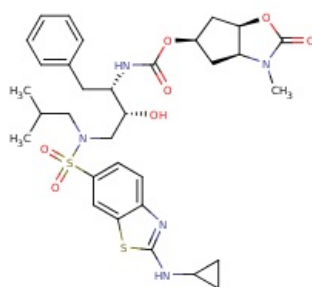

## Frequency of Target Class

| Target                                                        | Uniprot ID | Gene code | ChEMBL ID     | Probability            | # sim. cmpds (3D / 2D) | Target Class       |
|---------------------------------------------------------------|------------|-----------|---------------|------------------------|------------------------|--------------------|
| Cytochrome P450 3A4                                           | P08684     | CYP3A4    | CHEMBL340     | <div><div></div></div> | 5 / 1                  | Enzyme             |
| Thromboxane-A synthase                                        | P24557     | TBXAS1    | CHEMBL1835    | <div><div></div></div> | 6 / 1                  | Enzyme             |
| Cytochrome P450 3A5 (by homology)                             | P20815     | CYP3A5    | CHEMBL3019    | <div><div></div></div> | 5 / 1                  | Enzyme             |
| Cytochrome P450 3A7 (by homology)                             | P24462     | CYP3A7    |               | <div><div></div></div> | 5 / 1                  | Enzyme             |
| Cytochrome P450 3A43 (by homology)                            | Q9HB55     | CYP3A43   | CHEMBL5792    | <div><div></div></div> | 5 / 1                  | Enzyme             |
| Muscleblind-like protein 1                                    | Q9NR56     | MBNL1     | CHEMBL1293317 | <div><div></div></div> | 177 / 2                | Unclassified       |
| Muscleblind-like protein 2 (by homology)                      | Q5VZF2     | MBNL2     |               | <div><div></div></div> | 177 / 2                | Unclassified       |
| Muscleblind-like protein 3 (by homology)                      | Q9NUK0     | MBNL3     |               | <div><div></div></div> | 177 / 2                | Unclassified       |
| Microtubule-associated protein tau                            | P10636     | MAPT      | CHEMBL1293224 | <div><div></div></div> | 181 / 13               | Unclassified       |
| Dual specificity tyrosine-phosphorylation-regulated kinase 1A | Q13627     | DYRK1A    | CHEMBL2292    | <div><div></div></div> | 10 / 12                | Ser_Thr_Tyr Kinase |
| C-C chemokine receptor type 1 (by homology)                   | P32246     | CCR1      | CHEMBL2413    | <div><div></div></div> | 106 / 13               | Membrane receptor  |
| C-C chemokine receptor type 2 (by homology)                   | P41597     | CCR2      | CHEMBL4015    | <div><div></div></div> | 106 / 13               | Membrane receptor  |
| C-C chemokine receptor type 3                                 | P51677     | CCR3      | CHEMBL3473    | <div><div></div></div> | 106 / 13               | Membrane receptor  |
| C-C chemokine receptor type 5                                 | P51681     | CCR5      | CHEMBL274     | <div><div></div></div> | 106 / 13               | Membrane receptor  |
| C-C chemokine receptor-like 2 (by homology)                   | C9JP23     | CCRL2     |               | <div><div></div></div> | 102 / 13               | Membrane receptor  |

# Polypharmacology Browser 2 Prediction:

Targets predicted using NN(ECfp4) + NB(ECfp4).

Save Table

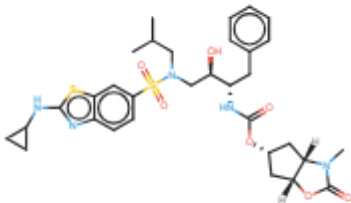

Query molecule

Target class overview

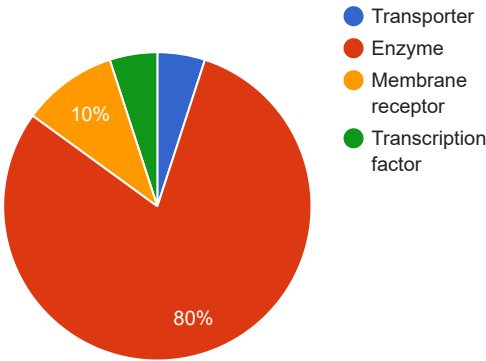

| Rank | ChEMBL ID                                                                                                                                           | Common name                    | Nearest neighbours |
|------|-----------------------------------------------------------------------------------------------------------------------------------------------------|--------------------------------|--------------------|
| 1    | CHEMBL204 ( <a href="https://www.ebi.ac.uk/chembl/target/inspect/CHEMBL204">https://www.ebi.ac.uk/chembl/target/inspect/CHEMBL204</a> )             | Thrombin                       | Show NN            |
| 2    | CHEMBL283 ( <a href="https://www.ebi.ac.uk/chembl/target/inspect/CHEMBL283">https://www.ebi.ac.uk/chembl/target/inspect/CHEMBL283</a> )             | Matrix metalloproteinase 3     | Show NN            |
| 3    | CHEMBL340 ( <a href="https://www.ebi.ac.uk/chembl/target/inspect/CHEMBL340">https://www.ebi.ac.uk/chembl/target/inspect/CHEMBL340</a> )             | Cytochrome P450 3A4            | Show NN            |
| 4    | CHEMBL332 ( <a href="https://www.ebi.ac.uk/chembl/target/inspect/CHEMBL332">https://www.ebi.ac.uk/chembl/target/inspect/CHEMBL332</a> )             | Matrix metalloproteinase-1     | Show NN            |
| 5    | CHEMBL2334 ( <a href="https://www.ebi.ac.uk/chembl/target/inspect/CHEMBL2334">https://www.ebi.ac.uk/chembl/target/inspect/CHEMBL2334</a> )          | Caspase-3                      | Show NN            |
| 6    | CHEMBL261 ( <a href="https://www.ebi.ac.uk/chembl/target/inspect/CHEMBL261">https://www.ebi.ac.uk/chembl/target/inspect/CHEMBL261</a> )             | Carbonic anhydrase I           | Show NN            |
| 7    | CHEMBL205 ( <a href="https://www.ebi.ac.uk/chembl/target/inspect/CHEMBL205">https://www.ebi.ac.uk/chembl/target/inspect/CHEMBL205</a> )             | Carbonic anhydrase II          | Show NN            |
| 8    | CHEMBL333 ( <a href="https://www.ebi.ac.uk/chembl/target/inspect/CHEMBL333">https://www.ebi.ac.uk/chembl/target/inspect/CHEMBL333</a> )             | Matrix metalloproteinase-2     | Show NN            |
| 9    | CHEMBL3594 ( <a href="https://www.ebi.ac.uk/chembl/target/inspect/CHEMBL3594">https://www.ebi.ac.uk/chembl/target/inspect/CHEMBL3594</a> )          | Carbonic anhydrase IX          | Show NN            |
| 10   | CHEMBL4561 ( <a href="https://www.ebi.ac.uk/chembl/target/inspect/CHEMBL4561">https://www.ebi.ac.uk/chembl/target/inspect/CHEMBL4561</a> )          | Neuropeptide Y receptor type 5 | Show NN            |
| 11   | CHEMBL321 ( <a href="https://www.ebi.ac.uk/chembl/target/inspect/CHEMBL321">https://www.ebi.ac.uk/chembl/target/inspect/CHEMBL321</a> )             | Matrix metalloproteinase 9     | Show NN            |
| 12   | CHEMBL4072 ( <a href="https://www.ebi.ac.uk/chembl/target/inspect/CHEMBL4072">https://www.ebi.ac.uk/chembl/target/inspect/CHEMBL4072</a> )          | Cathepsin B                    | Show NN            |
| 13   | CHEMBL280 ( <a href="https://www.ebi.ac.uk/chembl/target/inspect/CHEMBL280">https://www.ebi.ac.uk/chembl/target/inspect/CHEMBL280</a> )             | Matrix metalloproteinase 13    | Show NN            |
| 14   | CHEMBL3242 ( <a href="https://www.ebi.ac.uk/chembl/target/inspect/CHEMBL3242">https://www.ebi.ac.uk/chembl/target/inspect/CHEMBL3242</a> )          | Carbonic anhydrase XII         | Show NN            |
| 15   | CHEMBL4588 ( <a href="https://www.ebi.ac.uk/chembl/target/inspect/CHEMBL4588">https://www.ebi.ac.uk/chembl/target/inspect/CHEMBL4588</a> )          | Matrix metalloproteinase 8     | Show NN            |
| 16   | CHEMBL3869 ( <a href="https://www.ebi.ac.uk/chembl/target/inspect/CHEMBL3869">https://www.ebi.ac.uk/chembl/target/inspect/CHEMBL3869</a> )          | Matrix metalloproteinase 14    | Show NN            |
| 17   | CHEMBL3706 ( <a href="https://www.ebi.ac.uk/chembl/target/inspect/CHEMBL3706">https://www.ebi.ac.uk/chembl/target/inspect/CHEMBL3706</a> )          | ADAM17                         | Show NN            |
| 18   | CHEMBL1741186 ( <a href="https://www.ebi.ac.uk/chembl/target/inspect/CHEMBL1741186">https://www.ebi.ac.uk/chembl/target/inspect/CHEMBL1741186</a> ) | Nuclear receptor ROR-gamma     | Show NN            |

|    |                                                                                                                                            |                            |         |
|----|--------------------------------------------------------------------------------------------------------------------------------------------|----------------------------|---------|
| 19 | CHEMBL2871 ( <a href="https://www.ebi.ac.uk/chembl/target/inspect/CHEMBL2871">https://www.ebi.ac.uk/chembl/target/inspect/CHEMBL2871</a> ) | Cholecystikin A receptor   | Show NN |
| 20 | CHEMBL4076 ( <a href="https://www.ebi.ac.uk/chembl/target/inspect/CHEMBL4076">https://www.ebi.ac.uk/chembl/target/inspect/CHEMBL4076</a> ) | Sodium/calcium exchanger 1 | Show NN |
