# Supplementary material for: Accelerating Drug Discovery by Early Protein Drug Target Prediction Based on a Multi-Fingerprint Similarity Search
Source: MDPI journal article supplement (doi:10.3390/molecules24122233), 2019-06-14
Supplement: s1 [file s1]

**MuSSel not predicted**

# SwissTargetPrediction report:

**Reference:**  
Gfeller D., Michielin O. & Zoete V.  
*Shaping the interaction landscape of bioactive molecules, Bioinformatics* (2013) 29:3073-3079.

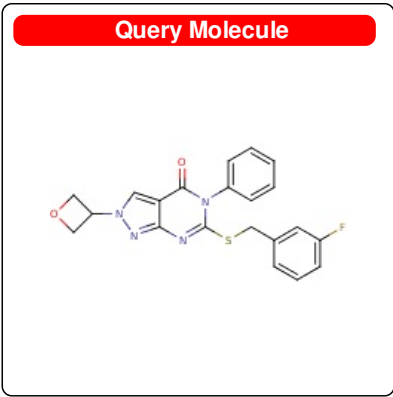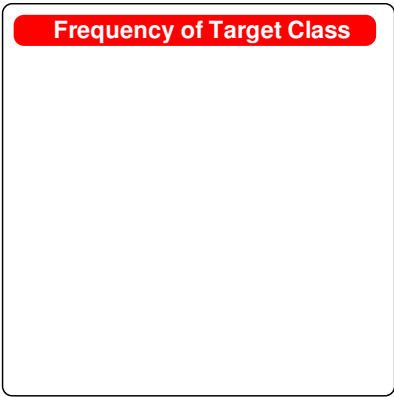

| Target                                                                                       | Uniprot ID | Gene code | ChEMBL ID     | Probability            | # sim. cmpds (3D / 2D) | Target Class   |
|----------------------------------------------------------------------------------------------|------------|-----------|---------------|------------------------|------------------------|----------------|
| Mitogen-activated protein kinase 8 (by homology)                                             | P45983     | MAPK8     | CHEMBL2276    | <div><div></div></div> | 312 / 0                | Ser_Thr Kinase |
| Mitogen-activated protein kinase 9 (by homology)                                             | P45984     | MAPK9     | CHEMBL4179    | <div><div></div></div> | 312 / 0                | Ser_Thr Kinase |
| Mitogen-activated protein kinase 10 (by homology)                                            | P53779     | MAPK10    | CHEMBL2637    | <div><div></div></div> | 312 / 0                | Ser_Thr Kinase |
| Mitogen-activated protein kinase 11 (by homology)                                            | Q15759     | MAPK11    | CHEMBL3961    | <div><div></div></div> | 314 / 0                | Ser_Thr Kinase |
| Mitogen-activated protein kinase 14                                                          | Q16539     | MAPK14    | CHEMBL260     | <div><div></div></div> | 314 / 0                | Ser_Thr Kinase |
| Phosphatidylinositol 4,5-bisphosphate 3-kinase catalytic subunit delta isoform               | O00329     | PIK3CD    | CHEMBL3130    | <div><div></div></div> | 386 / 0                | Enzyme         |
| Phosphatidylinositol 4,5-bisphosphate 3-kinase catalytic subunit alpha isoform (by homology) | P42336     | PIK3CA    | CHEMBL4005    | <div><div></div></div> | 388 / 0                | Enzyme         |
| Phosphatidylinositol 4,5-bisphosphate 3-kinase catalytic subunit beta isoform                | P42338     | PIK3CB    | CHEMBL3145    | <div><div></div></div> | 386 / 0                | Enzyme         |
| DNA-dependent protein kinase catalytic subunit                                               | P78527     | PRKDC     | CHEMBL3142    | <div><div></div></div> | 158 / 0                | Ser_Thr Kinase |
| Muscleblind-like protein 1                                                                   | Q9NR56     | MBNL1     | CHEMBL1293317 | <div><div></div></div> | 491 / 0                | Unclassified   |
| Muscleblind-like protein 2 (by homology)                                                     | Q5VZF2     | MBNL2     |               | <div><div></div></div> | 491 / 0                | Unclassified   |
| Muscleblind-like protein 3 (by homology)                                                     | Q9NUK0     | MBNL3     |               | <div><div></div></div> | 491 / 0                | Unclassified   |
| Microtubule-associated protein tau                                                           | P10636     | MAPT      | CHEMBL1293224 | <div><div></div></div> | 554 / 0                | Unclassified   |

|                                   |                             |                        |               |                        |        |                                          |
|-----------------------------------|-----------------------------|------------------------|---------------|------------------------|--------|------------------------------------------|
| tau                               |                             |                        |               |                        |        |                                          |
| Neuropeptide Y<br>receptor type 5 | Q15761                      | NPY5R                  | CHEMBL4561    | <div><div></div></div> | 60 / 0 | Membrane<br>receptor                     |
| Complex                           | P30281/P24385/P11802/P30279 | CCND3/CCND1/CDK4/CCND2 | CHEMBL2095942 | <div><div></div></div> | 10 / 0 | Cytosolic<br>other<br>/Ser_Thr<br>Kinase |

## Polypharmacology Browser 2 Prediction:

Targets predicted using NN(ECfp4) + NB(ECfp4).

Save Table

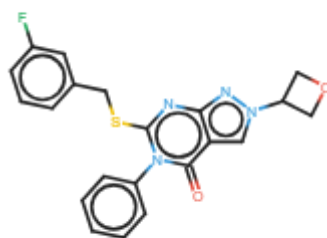

Query molecule

Target class overview

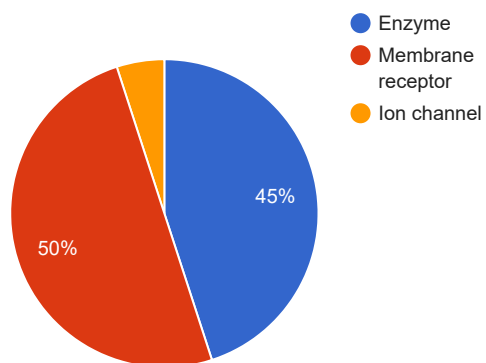

| Rank | ChEMBL ID                                                                                                                                  | Common name                                   | Nearest neighbours |
|------|--------------------------------------------------------------------------------------------------------------------------------------------|-----------------------------------------------|--------------------|
| 1    | CHEMBL217 ( <a href="https://www.ebi.ac.uk/chembl/target/inspect/CHEMBL217">https://www.ebi.ac.uk/chembl/target/inspect/CHEMBL217</a> )    | Dopamine D2 receptor                          | Show NN            |
| 2    | CHEMBL3717 ( <a href="https://www.ebi.ac.uk/chembl/target/inspect/CHEMBL3717">https://www.ebi.ac.uk/chembl/target/inspect/CHEMBL3717</a> ) | Hepatocyte growth factor receptor             | Show NN            |
| 3    | CHEMBL240 ( <a href="https://www.ebi.ac.uk/chembl/target/inspect/CHEMBL240">https://www.ebi.ac.uk/chembl/target/inspect/CHEMBL240</a> )    | HERG                                          | Show NN            |
| 4    | CHEMBL251 ( <a href="https://www.ebi.ac.uk/chembl/target/inspect/CHEMBL251">https://www.ebi.ac.uk/chembl/target/inspect/CHEMBL251</a> )    | Adenosine A2a receptor                        | Show NN            |
| 5    | CHEMBL234 ( <a href="https://www.ebi.ac.uk/chembl/target/inspect/CHEMBL234">https://www.ebi.ac.uk/chembl/target/inspect/CHEMBL234</a> )    | Dopamine D3 receptor                          | Show NN            |
| 6    | CHEMBL224 ( <a href="https://www.ebi.ac.uk/chembl/target/inspect/CHEMBL224">https://www.ebi.ac.uk/chembl/target/inspect/CHEMBL224</a> )    | Serotonin 2a (5-HT2a) receptor                | Show NN            |
| 7    | CHEMBL4005 ( <a href="https://www.ebi.ac.uk/chembl/target/inspect/CHEMBL4005">https://www.ebi.ac.uk/chembl/target/inspect/CHEMBL4005</a> ) | PI3-kinase p110-alpha subunit                 | Show NN            |
| 8    | CHEMBL3130 ( <a href="https://www.ebi.ac.uk/chembl/target/inspect/CHEMBL3130">https://www.ebi.ac.uk/chembl/target/inspect/CHEMBL3130</a> ) | PI3-kinase p110-delta subunit                 | Show NN            |
| 9    | CHEMBL344 ( <a href="https://www.ebi.ac.uk/chembl/target/inspect/CHEMBL344">https://www.ebi.ac.uk/chembl/target/inspect/CHEMBL344</a> )    | Melanin-concentrating hormone receptor 1      | Show NN            |
| 10   | CHEMBL226 ( <a href="https://www.ebi.ac.uk/chembl/target/inspect/CHEMBL226">https://www.ebi.ac.uk/chembl/target/inspect/CHEMBL226</a> )    | Adenosine A1 receptor                         | Show NN            |
| 11   | CHEMBL260 ( <a href="https://www.ebi.ac.uk/chembl/target/inspect/CHEMBL260">https://www.ebi.ac.uk/chembl/target/inspect/CHEMBL260</a> )    | MAP kinase p38 alpha                          | Show NN            |
| 12   | CHEMBL4409 ( <a href="https://www.ebi.ac.uk/chembl/target/inspect/CHEMBL4409">https://www.ebi.ac.uk/chembl/target/inspect/CHEMBL4409</a> ) | Phosphodiesterase 10A                         | Show NN            |
| 13   | CHEMBL204 ( <a href="https://www.ebi.ac.uk/chembl/target/inspect/CHEMBL204">https://www.ebi.ac.uk/chembl/target/inspect/CHEMBL204</a> )    | Thrombin                                      | Show NN            |
| 14   | CHEMBL3267 ( <a href="https://www.ebi.ac.uk/chembl/target/inspect/CHEMBL3267">https://www.ebi.ac.uk/chembl/target/inspect/CHEMBL3267</a> ) | PI3-kinase p110-gamma subunit                 | Show NN            |
| 15   | CHEMBL225 ( <a href="https://www.ebi.ac.uk/chembl/target/inspect/CHEMBL225">https://www.ebi.ac.uk/chembl/target/inspect/CHEMBL225</a> )    | Serotonin 2c (5-HT2c) receptor                | Show NN            |
| 16   | CHEMBL5071 ( <a href="https://www.ebi.ac.uk/chembl/target/inspect/CHEMBL5071">https://www.ebi.ac.uk/chembl/target/inspect/CHEMBL5071</a> ) | G protein-coupled receptor 44                 | Show NN            |
| 17   | CHEMBL279 ( <a href="https://www.ebi.ac.uk/chembl/target/inspect/CHEMBL279">https://www.ebi.ac.uk/chembl/target/inspect/CHEMBL279</a> )    | Vascular endothelial growth factor receptor 2 | Show NN            |
| 18   | CHEMBL287 ( <a href="https://www.ebi.ac.uk/chembl/target/inspect/CHEMBL287">https://www.ebi.ac.uk/chembl/target/inspect/CHEMBL287</a> )    | Sigma opioid receptor                         | Show NN            |

|    |                                                                                                                                            |                                     |         |
|----|--------------------------------------------------------------------------------------------------------------------------------------------|-------------------------------------|---------|
| 19 | CHEMBL214 ( <a href="https://www.ebi.ac.uk/chembl/target/inspect/CHEMBL214">https://www.ebi.ac.uk/chembl/target/inspect/CHEMBL214</a> )    | Serotonin 1a (5-HT1a) receptor      | Show NN |
| 20 | CHEMBL4282 ( <a href="https://www.ebi.ac.uk/chembl/target/inspect/CHEMBL4282">https://www.ebi.ac.uk/chembl/target/inspect/CHEMBL4282</a> ) | Serine/threonine-protein kinase AKT | Show NN |
