# Supplementary material for: Accelerating Drug Discovery by Early Protein Drug Target Prediction Based on a Multi-Fingerprint Similarity Search
Source: MDPI journal article supplement (doi:10.3390/molecules24122233), 2019-06-14
Supplement: s1 [file s1]

## MuSSEL Prediction k<sub>i</sub>:

1 rank

p53-binding protein Mdm-2 : Homo sapiens

score: 6.243 on ChEMBL5023 based on 8 fingerprints

| Fingerprint type | Ligand        | Tanimoto Similarity | activity | Valid fg |
|------------------|---------------|---------------------|----------|----------|
| FeatMFP1         | CHEMBL3355423 | 0.687500            | 1238.00  |          |
| MFP1             | CHEMBL3355430 | 0.606557            | 0.16     | *        |
| RDKit7           | CHEMBL3355430 | 0.917831            | 0.16     | *        |
| Pattern          | CHEMBL3355430 | 0.794145            | 0.16     |          |
| AP_bits          | CHEMBL3355430 | 0.447471            | 0.16     |          |
| TT_bits          | CHEMBL3355430 | 0.671533            | 0.16     | *        |
| FP2              | CHEMBL3355430 | 0.735426            | 0.16     | *        |
| hybridization    | CHEMBL3355430 | 0.777305            | 0.16     | *        |
| substructure     | CHEMBL3355430 | 0.777778            | 0.16     |          |
| graph            | CHEMBL3355430 | 0.971429            | 0.16     | *        |
| pubchem          | CHEMBL409889  | 0.841530            | 39.00    |          |
| cdk_maccs        | CHEMBL3355421 | 0.891892            | 1.70     | *        |
| klekota_roth     | CHEMBL3355430 | 0.670588            | 0.16     | *        |

\*\*\* ki ACTIVITY \*\*\* value prediction

based on 8 locally validated fgps ---> 162.342

["TT\_bits", "cdk\_maccs", "graph", "MFP1", "klekota\_roth", "FP2",  
"RDKit7", "hybridization"]

## MuSSEL Prediction IC<sub>50</sub>:

1 rank

p53-binding protein Mdm-2 : Homo sapiens

score: 8.586 on ChEMBL5023 based on 11 fingerprints

| Fingerprint type | Ligand        | Tanimoto | Similarity | activity | Valid fg |
|------------------|---------------|----------|------------|----------|----------|
| FeatMFP1         | ChEMBL3693968 |          | 0.733333   | 100.0    | *        |
| MFP1             | ChEMBL3693972 |          | 0.612903   | 100.0    | *        |
| RDKit7           | ChEMBL3355430 |          | 0.917831   | 4.4      | *        |
| Pattern          | ChEMBL3693970 |          | 0.825922   | 100.0    |          |
| AP_bits          | ChEMBL3703353 |          | 0.639013   | 80.1     | *        |
| TT_bits          | ChEMBL3355430 |          | 0.671533   | 4.4      | *        |
| FP2              | ChEMBL3693974 |          | 0.761062   | 100.0    | *        |
| hybridization    | ChEMBL3693976 |          | 0.779167   | 100.0    | *        |
| substructure     | ChEMBL3693969 |          | 0.791667   | 100.0    |          |
| graph            | ChEMBL3355430 |          | 0.971429   | 4.4      | *        |
| pubchem          | ChEMBL3693982 |          | 0.844920   | 100.0    | *        |
| cdk_maccs        | ChEMBL3693982 |          | 0.931507   | 100.0    | *        |
| klekota_roth     | ChEMBL3693983 |          | 0.723529   | 100.0    | *        |

\*\*\* ic50 ACTIVITY \*\*\* value prediction

based on 11 locally validated fgps ---> 289.600

["TT\_bits", "cdk\_maccs", "AP\_bits", "MFP1", "klekota\_roth", "pubchem", "graph", "FP2", "FeatMFP1", "RDKit7", "hybridization"]

2 rank

Cholinesterase : Equus caballus

score: 5.506 on ChEMBL5763 based on 7 fingerprints

| Fingerprint type | Ligand        | Tanimoto | Similarity | activity | Valid fg |
|------------------|---------------|----------|------------|----------|----------|
| FeatMFP1         | ChEMBL3633479 |          | 0.516129   | 2650.0   |          |
| MFP1             | ChEMBL3235943 |          | 0.356164   | 27120.0  |          |
| RDKit7           | ChEMBL3235941 |          | 0.827957   | 11760.0  | *        |
| Pattern          | ChEMBL3235948 |          | 0.874459   | 26300.0  | *        |
| AP_bits          | ChEMBL2204447 |          | 0.587997   | 49.7     | *        |
| TT_bits          | ChEMBL3235943 |          | 0.378531   | 27120.0  |          |
| FP2              | ChEMBL3235952 |          | 0.583333   | 35860.0  |          |
| hybridization    | ChEMBL2332534 |          | 0.676225   | 11740.0  | *        |
| substructure     | ChEMBL3415565 |          | 0.680000   | 2377.0   |          |
| graph            | ChEMBL2380672 |          | 0.814815   | 3130.0   | *        |
| pubchem          | ChEMBL2380667 |          | 0.870968   | 9650.0   | *        |
| cdk_maccs        | ChEMBL2332531 |          | 0.853333   | 9450.0   | *        |
| klekota_roth     | ChEMBL2380672 |          | 0.549223   | 3130.0   |          |

\*\*\* ic50 ACTIVITY \*\*\* value prediction

based on 7 locally validated fgps ---> 13259.989

["cdk\_maccs", "Pattern", "AP\_bits", "pubchem", "graph", "RDKit7", "hybridization"]

3 rank

Acetylcholinesterase : Homo sapiens

score: 5.442 on ChEMBL220 based on 7 fingerprints

| Fingerprint type | Ligand        | Tanimoto | Similarity | activity | Valid fg |
|------------------|---------------|----------|------------|----------|----------|
| FeatMFP1         | ChEMBL1288823 |          | 0.529412   | 9860.00  |          |
| MFP1             | ChEMBL1288825 |          | 0.347826   | 12200.00 |          |
| RDKit7           | ChEMBL1288829 |          | 0.811321   | 4200.00  | *        |
| Pattern          | ChEMBL3115036 |          | 0.855035   | 6140.00  | *        |
| AP_bits          | ChEMBL575674  |          | 0.560129   | 5.96     | *        |
| TT_bits          | ChEMBL1288825 |          | 0.357955   | 12200.00 |          |
| FP2              | ChEMBL1288823 |          | 0.575875   | 9860.00  |          |
| hybridization    | ChEMBL2332534 |          | 0.676225   | 13640.00 | *        |
| substructure     | ChEMBL1288823 |          | 0.769231   | 9860.00  |          |
| graph            | ChEMBL2380672 |          | 0.814815   | 29510.00 | *        |
| pubchem          | ChEMBL2380667 |          | 0.870968   | 5810.00  | *        |
| cdk_maccs        | ChEMBL2332531 |          | 0.853333   | 6960.00  | *        |

```
klekota_roth CHEMBL2380672 0.549223 29510.00
  *** ic50 ACTIVITY *** value prediction
    based on 7 locally validated fgps ---> 11328.198
["cdk_maccs", "Pattern", "AP_bits", "pubchem", "graph", "RDKit7",
"hybridization"]
```

# SwissTargetPrediction report:

## Reference:

Gfeller D., Michielin O. & Zoete V.  
 Shaping the interaction landscape of  
 bioactive molecules, *Bioinformatics*  
 (2013) 29:3073-3079.

## Query Molecule

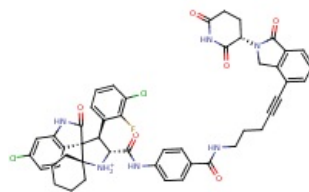

## Frequency of Target Class

| Target                                            | Uniprot ID | Gene code | ChEMBL ID     | Probability            | # sim. cmpds (3D / 2D) | Target Class      |
|---------------------------------------------------|------------|-----------|---------------|------------------------|------------------------|-------------------|
| Microtubule-associated protein tau                | P10636     | MAPT      | CHEMBL1293224 | <div><div></div></div> | 4 / 2                  | Unclassified      |
| E3 ubiquitin-protein ligase Mdm2                  | Q00987     | MDM2      | CHEMBL5023    | <div><div></div></div> | 0 / 27                 | Nuclear other     |
| Cholinesterase ( <i>by homology</i> )             | P06276     | BCHE      | CHEMBL1914    | <div><div></div></div> | 18 / 22                | Enzyme            |
| Acetylcholinesterase                              | P22303     | ACHE      | CHEMBL220     | <div><div></div></div> | 18 / 22                | Enzyme            |
| Muscleblind-like protein 1                        | Q9NR56     | MBNL1     | CHEMBL1293317 | <div><div></div></div> | 2 / 3                  | Unclassified      |
| Muscleblind-like protein 2 ( <i>by homology</i> ) | Q5VZF2     | MBNL2     |               | <div><div></div></div> | 2 / 3                  | Unclassified      |
| Muscleblind-like protein 3 ( <i>by homology</i> ) | Q9NUK0     | MBNL3     |               | <div><div></div></div> | 2 / 3                  | Unclassified      |
| Calcitonin receptor ( <i>by homology</i> )        | P30988     | CALCR     | CHEMBL1832    | <div><div></div></div> | 20 / 8                 | Membrane receptor |
| Calcitonin gene-related peptide type 1 receptor   | Q16602     | CALCRL    | CHEMBL3798    | <div><div></div></div> | 21 / 14                | Membrane receptor |
| D(2) dopamine receptor                            | P14416     | DRD2      | CHEMBL217     | <div><div></div></div> | 44 / 34                | Membrane receptor |
| D(4) dopamine receptor                            | P21917     | DRD4      | CHEMBL219     | <div><div></div></div> | 24 / 30                | Membrane receptor |
| D(3) dopamine receptor                            | P35462     | DRD3      | CHEMBL234     | <div><div></div></div> | 33 / 30                | Membrane receptor |
| Gastrin/cholecystokinin type B receptor           | P32239     | CCKBR     | CHEMBL298     | <div><div></div></div> | 8 / 25                 | Membrane receptor |
| Cathepsin L1 light chain                          | P07711     | CTSL1     | CHEMBL3837    | <div><div></div></div> | 7 / 22                 | Cysteine Protease |
| Cathepsin S                                       | P25774     | CTSS      | CHEMBL2954    | <div><div></div></div> | 7 / 22                 | Cysteine Protease |

**Polypharmacology Browser 2 not predicted**
