# Supplementary material for: Accelerating Drug Discovery by Early Protein Drug Target Prediction Based on a Multi-Fingerprint Similarity Search
Source: MDPI journal article supplement (doi:10.3390/molecules24122233), 2019-06-14
Supplement: s1 [file s1]

## MuSSEL Prediction k<sub>i</sub>:

1 rank

Thrombin : Homo sapiens

score: 7.800 on ChEMBL204 based on 10 fingerprints

| Fingerprint type | Ligand       | Tanimoto Similarity | activity | Valid fg |
|------------------|--------------|---------------------|----------|----------|
| FeatMFP1         | ChEMBL179210 | 0.766667            | 1.10     | *        |
| MFP1             | ChEMBL164138 | 0.666667            | 12300.00 | *        |
| RDKit7           | ChEMBL366882 | 0.824427            | 3.10     | *        |
| Pattern          | ChEMBL366882 | 0.921348            | 3.10     | *        |
| AP_bits          | ChEMBL366882 | 0.620787            | 3.10     | *        |
| TT_bits          | ChEMBL366882 | 0.594059            | 3.10     | *        |
| FP2              | ChEMBL366882 | 0.826667            | 3.10     | *        |
| hybridization    | ChEMBL403735 | 0.773616            | 1.10     | *        |
| substructure     | ChEMBL164138 | 0.913043            | 12300.00 | *        |
| graph            | ChEMBL319615 | 0.762658            | 5300.00  |          |
| pubchem          | ChEMBL366882 | 0.892523            | 3.10     | *        |
| cdk_maccs        | ChEMBL322307 | 0.813333            | 50.00    |          |
| klekota_roth     | ChEMBL282830 | 0.596639            | 0.65     |          |

\*\*\* ki ACTIVITY \*\*\* value prediction

based on 10 locally validated fgps ---> 1850.557

["TT\_bits", "substructure", "Pattern", "FP2", "MFP1", "pubchem",  
"AP\_bits", "FeatMFP1", "RDKit7", "hybridization"]

2 rank

Trypsin I : Bos taurus

score: 7.782 on ChEMBL3769 based on 10 fingerprints

| Fingerprint type | Ligand       | Tanimoto Similarity | activity | Valid fg |
|------------------|--------------|---------------------|----------|----------|
| FeatMFP1         | ChEMBL179210 | 0.766667            | 22.0     | *        |
| MFP1             | ChEMBL360684 | 0.666667            | 30.0     | *        |
| RDKit7           | ChEMBL366882 | 0.824427            | 2.0      | *        |
| Pattern          | ChEMBL366882 | 0.921348            | 2.0      | *        |
| AP_bits          | ChEMBL366882 | 0.620787            | 2.0      | *        |
| TT_bits          | ChEMBL366882 | 0.594059            | 2.0      | *        |
| FP2              | ChEMBL366882 | 0.826667            | 2.0      | *        |
| hybridization    | ChEMBL366882 | 0.756058            | 2.0      | *        |
| substructure     | ChEMBL360684 | 0.913043            | 30.0     | *        |
| graph            | ChEMBL257898 | 0.760714            | 16.0     |          |
| pubchem          | ChEMBL366882 | 0.892523            | 2.0      | *        |
| cdk_maccs        | ChEMBL368894 | 0.805556            | 22.0     |          |
| klekota_roth     | ChEMBL180219 | 0.636364            | 250.0    |          |

\*\*\* ki ACTIVITY \*\*\* value prediction

based on 10 locally validated fgps ---> 75.164

["TT\_bits", "substructure", "Pattern", "FP2", "MFP1", "pubchem",  
"AP\_bits", "FeatMFP1", "RDKit7", "hybridization"]

3 rank

Serine protease hepsin : Homo sapiens

score: 3.655 on ChEMBL2079849 based on 5 fingerprints

| Fingerprint type | Ligand        | Tanimoto Similarity | activity | Valid fg |
|------------------|---------------|---------------------|----------|----------|
| FeatMFP1         | ChEMBL3746517 | 0.700000            | 2.91     |          |
| MFP1             | ChEMBL3746517 | 0.652174            | 2.91     | *        |
| RDKit7           | ChEMBL3746517 | 0.727202            | 2.91     |          |
| Pattern          | ChEMBL3402437 | 0.709635            | 3500.00  |          |
| AP_bits          | ChEMBL3402438 | 0.538776            | 2600.00  | *        |
| TT_bits          | ChEMBL3746517 | 0.537500            | 2.91     |          |
| FP2              | ChEMBL3746517 | 0.740385            | 2.91     | *        |
| hybridization    | ChEMBL3746517 | 0.807207            | 2.91     | *        |
| substructure     | ChEMBL3747468 | 0.916667            | 2.88     | *        |
| graph            | ChEMBL3746517 | 0.773438            | 2.91     |          |
| pubchem          | ChEMBL3746517 | 0.805000            | 2.91     |          |
| cdk_maccs        | ChEMBL3746517 | 0.746479            | 2.91     |          |

```

klekota_roth CHEMBL3746517          0.605042      2.91
*** ki ACTIVITY *** value prediction
based on 5 locally validated fgps ---> 522.183
["AP_bits", "hybridization", "MFP1", "substructure", "FP2"]

```

4 rank

Trypsin I : Homo sapiens

score: 3.610 on ChEMBL209 based on 5 fingerprints

| Fingerprint type | Ligand       | Tanimoto | Similarity | activity | Valid fg |
|------------------|--------------|----------|------------|----------|----------|
| FeatMFP1         | CHEMBL164138 |          | 0.724138   | 30.0     |          |
| MFP1             | CHEMBL164138 |          | 0.666667   | 30.0     | *        |
| RDKit7           | CHEMBL341148 |          | 0.716385   | 160.0    |          |
| Pattern          | CHEMBL332716 |          | 0.808140   | 4000.0   |          |
| AP_bits          | CHEMBL311198 |          | 0.568460   | 13.5     | *        |
| TT_bits          | CHEMBL164138 |          | 0.481481   | 30.0     |          |
| FP2              | CHEMBL341148 |          | 0.710407   | 160.0    | *        |
| hybridization    | CHEMBL164138 |          | 0.751351   | 30.0     | *        |
| substructure     | CHEMBL164138 |          | 0.913043   | 30.0     | *        |
| graph            | CHEMBL339703 |          | 0.778210   | 53.0     |          |
| pubchem          | CHEMBL341148 |          | 0.831683   | 160.0    |          |
| cdk_maccs        | CHEMBL340098 |          | 0.808824   | 260.0    |          |
| klekota_roth     | CHEMBL164138 |          | 0.572650   | 30.0     |          |

\*\*\* ki ACTIVITY \*\*\* value prediction

based on 5 locally validated fgps ---> 52.604

["AP\_bits", "hybridization", "MFP1", "substructure", "FP2"]

5 rank

Matriptase : Homo sapiens

score: 3.560 on ChEMBL3018 based on 5 fingerprints

| Fingerprint type | Ligand        | Tanimoto | Similarity | activity | Valid fg |
|------------------|---------------|----------|------------|----------|----------|
| FeatMFP1         | CHEMBL2089124 |          | 0.700000   | 1.4      |          |
| MFP1             | CHEMBL2089124 |          | 0.666667   | 1.4      | *        |
| RDKit7           | CHEMBL2089124 |          | 0.699449   | 1.4      |          |
| Pattern          | CHEMBL2089121 |          | 0.765926   | 6124.0   |          |
| AP_bits          | CHEMBL3402438 |          | 0.538776   | 6700.0   | *        |
| TT_bits          | CHEMBL2089124 |          | 0.487179   | 1.4      |          |
| FP2              | CHEMBL2089124 |          | 0.725962   | 1.4      | *        |
| hybridization    | CHEMBL2089124 |          | 0.777982   | 1.4      | *        |
| substructure     | CHEMBL2089124 |          | 0.740741   | 1.4      |          |
| graph            | CHEMBL2089121 |          | 0.750929   | 6124.0   |          |
| pubchem          | CHEMBL2089124 |          | 0.785000   | 1.4      |          |
| cdk_maccs        | CHEMBL2089121 |          | 0.850746   | 6124.0   | *        |
| klekota_roth     | CHEMBL2089124 |          | 0.620370   | 1.4      |          |

\*\*\* ki ACTIVITY \*\*\* value prediction

based on 5 locally validated fgps ---> 1947.147

["AP\_bits", "hybridization", "MFP1", "cdk\_maccs", "FP2"]

6 rank

Tryptase beta-1 : Homo sapiens

score: 3.021 on ChEMBL2617 based on 4 fingerprints

| Fingerprint type | Ligand       | Tanimoto | Similarity | activity | Valid fg |
|------------------|--------------|----------|------------|----------|----------|
| FeatMFP1         | CHEMBL340547 |          | 0.724138   | 88.0     |          |
| MFP1             | CHEMBL340547 |          | 0.666667   | 88.0     | *        |
| RDKit7           | CHEMBL341148 |          | 0.716385   | 250.0    |          |
| Pattern          | CHEMBL311936 |          | 0.742029   | 6900.0   |          |
| AP_bits          | CHEMBL211638 |          | 0.502558   | 11.0     |          |
| TT_bits          | CHEMBL340547 |          | 0.481481   | 88.0     |          |
| FP2              | CHEMBL341148 |          | 0.710407   | 250.0    | *        |
| hybridization    | CHEMBL421643 |          | 0.730634   | 41.0     | *        |
| substructure     | CHEMBL340547 |          | 0.913043   | 88.0     | *        |

|              |              |          |       |
|--------------|--------------|----------|-------|
| graph        | CHEMBL339703 | 0.778210 | 20.0  |
| pubchem      | CHEMBL341148 | 0.831683 | 250.0 |
| cdk_maccs    | CHEMBL340098 | 0.808824 | 470.0 |
| klekota_roth | CHEMBL340547 | 0.572650 | 88.0  |

\*\*\* ki ACTIVITY \*\*\* value prediction

based on 4 locally validated fgps ---> 156.257

["hybridization", "MFp1", "substructure", "FP2"]

## MuSSEL Prediction IC<sub>50</sub>:

1 rank

Metacaspase : Trypanosoma brucei

score: 9.500 on ChEMBL1075193 based on 12 fingerprints

| Fingerprint type | Ligand        | Tanimoto | Similarity | activity | Valid fg |
|------------------|---------------|----------|------------|----------|----------|
| FeatMFP1         | ChEMBL1077318 |          | 0.793103   | 600.0    | *        |
| MFP1             | ChEMBL1077318 |          | 0.761905   | 600.0    | *        |
| RDKit7           | ChEMBL1082043 |          | 0.770912   | 1100.0   | *        |
| Pattern          | ChEMBL1082042 |          | 0.750000   | 1400.0   |          |
| AP_bits          | ChEMBL1082042 |          | 0.655864   | 1400.0   | *        |
| TT_bits          | ChEMBL1082042 |          | 0.558140   | 1400.0   | *        |
| FP2              | ChEMBL1082043 |          | 0.792627   | 1100.0   | *        |
| hybridization    | ChEMBL1082043 |          | 0.831858   | 1100.0   | *        |
| substructure     | ChEMBL1082042 |          | 0.916667   | 1400.0   | *        |
| graph            | ChEMBL1082042 |          | 0.928571   | 1400.0   | *        |
| pubchem          | ChEMBL1082042 |          | 0.879227   | 1400.0   | *        |
| cdk_maccs        | ChEMBL1082043 |          | 0.897059   | 1100.0   | *        |
| klekota_roth     | ChEMBL1082042 |          | 0.714286   | 1400.0   | *        |

\*\*\* ic50 ACTIVITY \*\*\* value prediction

based on 12 locally validated fgps ---> 1425.881

["TT\_bits", "substructure", "cdk\_maccs", "AP\_bits", "MFP1",  
"klekota\_roth", "pubchem", "graph", "FP2", "FeatMFP1", "RDKit7",  
"hybridization"]

2 rank

Thrombin : Homo sapiens

score: 9.227 on ChEMBL204 based on 12 fingerprints

| Fingerprint type | Ligand       | Tanimoto | Similarity | activity | Valid fg |
|------------------|--------------|----------|------------|----------|----------|
| FeatMFP1         | ChEMBL179210 |          | 0.766667   | 11.0     | *        |
| MFP1             | ChEMBL360684 |          | 0.666667   | 82000.0  | *        |
| RDKit7           | ChEMBL366882 |          | 0.824427   | 95.0     | *        |
| Pattern          | ChEMBL366882 |          | 0.921348   | 95.0     | *        |
| AP_bits          | ChEMBL407142 |          | 0.652231   | 11200.0  | *        |
| TT_bits          | ChEMBL366882 |          | 0.594059   | 95.0     | *        |
| FP2              | ChEMBL366882 |          | 0.826667   | 95.0     | *        |
| hybridization    | ChEMBL366882 |          | 0.756058   | 95.0     | *        |
| substructure     | ChEMBL360684 |          | 0.913043   | 82000.0  | *        |
| graph            | ChEMBL257898 |          | 0.760714   | 56.0     |          |
| pubchem          | ChEMBL366882 |          | 0.892523   | 95.0     | *        |
| cdk_maccs        | ChEMBL368894 |          | 0.805556   | 29.0     | *        |
| klekota_roth     | ChEMBL289477 |          | 0.607692   | 42000.0  | *        |

\*\*\* ic50 ACTIVITY \*\*\* value prediction

based on 12 locally validated fgps ---> 11129.924

["TT\_bits", "substructure", "cdk\_maccs", "Pattern", "FP2", "MFP1",  
"klekota\_roth", "pubchem", "AP\_bits", "FeatMFP1", "RDKit7",  
"hybridization"]

3 rank

Coagulation factor VII : Homo sapiens

score: 7.307 on ChEMBL3991 based on 10 fingerprints

| Fingerprint type | Ligand        | Tanimoto | Similarity | activity | Valid fg |
|------------------|---------------|----------|------------|----------|----------|
| FeatMFP1         | ChEMBL282830  |          | 0.718750   | 270.0    | *        |
| MFP1             | ChEMBL1797527 |          | 0.555556   | 16000.0  | *        |
| RDKit7           | ChEMBL27852   |          | 0.705432   | 200.0    | *        |
| Pattern          | ChEMBL27852   |          | 0.847059   | 200.0    | *        |
| AP_bits          | ChEMBL407142  |          | 0.652231   | 17800.0  | *        |
| TT_bits          | ChEMBL27852   |          | 0.386792   | 200.0    |          |
| FP2              | ChEMBL27852   |          | 0.729730   | 200.0    | *        |
| hybridization    | ChEMBL27852   |          | 0.736089   | 200.0    | *        |
| substructure     | ChEMBL339956  |          | 0.875000   | 3300.0   | *        |
| graph            | ChEMBL27852   |          | 0.727941   | 200.0    |          |

```

        pubchem    CHEMBL282830          0.830918      270.0      *
        cdk_maccs  CHEMBL1797527        0.746269     16000.0
        klekota_roth CHEMBL1797527      0.655738     16000.0      *
*** ic50 ACTIVITY *** value prediction
    based on 10 locally validated fgps ---> 3142.794
["substructure", "Pattern", "AP_bits", "MFP1", "klekota_roth", "pubchem",
"FP2", "FeatMFP1", "RDKit7", "hybridization"]

```

4 rank

Coagulation factor X : Homo sapiens

score: 7.273 on CHEMBL244 based on 10 fingerprints

| Fingerprint type | Ligand       | Tanimoto | Similarity | activity | Valid fg |
|------------------|--------------|----------|------------|----------|----------|
| FeatMFP1         | CHEMBL282830 |          | 0.718750   | 270.0    | *        |
| MFP1             | CHEMBL27852  |          | 0.545455   | 19.3     | *        |
| RDKit7           | CHEMBL27852  |          | 0.705432   | 19.3     | *        |
| Pattern          | CHEMBL27852  |          | 0.847059   | 19.3     | *        |
| AP_bits          | CHEMBL407142 |          | 0.652231   | 3140.0   | *        |
| TT_bits          | CHEMBL27852  |          | 0.386792   | 19.3     |          |
| FP2              | CHEMBL27852  |          | 0.729730   | 19.3     | *        |
| hybridization    | CHEMBL27852  |          | 0.736089   | 19.3     | *        |
| substructure     | CHEMBL339956 |          | 0.875000   | 2700.0   | *        |
| graph            | CHEMBL27852  |          | 0.727941   | 19.3     |          |
| pubchem          | CHEMBL282830 |          | 0.830918   | 270.0    | *        |
| cdk_maccs        | CHEMBL191264 |          | 0.792208   | 14300.0  |          |
| klekota_roth     | CHEMBL41722  |          | 0.632812   | 11000.0  | *        |

```

*** ic50 ACTIVITY *** value prediction
    based on 10 locally validated fgps ---> 1156.327
["substructure", "Pattern", "AP_bits", "MFP1", "klekota_roth", "pubchem",
"FP2", "FeatMFP1", "RDKit7", "hybridization"]

```

5 rank

Trypsin I : Homo sapiens

score: 6.579 on CHEMBL209 based on 9 fingerprints

| Fingerprint type | Ligand       | Tanimoto | Similarity | activity | Valid fg |
|------------------|--------------|----------|------------|----------|----------|
| FeatMFP1         | CHEMBL352928 |          | 0.709677   | 1.0      | *        |
| MFP1             | CHEMBL352928 |          | 0.545455   | 1.0      | *        |
| RDKit7           | CHEMBL352928 |          | 0.724138   | 1.0      | *        |
| Pattern          | CHEMBL352928 |          | 0.870398   | 1.0      | *        |
| AP_bits          | CHEMBL79245  |          | 0.581098   | 11000.0  | *        |
| TT_bits          | CHEMBL352928 |          | 0.362832   | 1.0      |          |
| FP2              | CHEMBL352928 |          | 0.735160   | 1.0      | *        |
| hybridization    | CHEMBL83001  |          | 0.701183   | 3700.0   | *        |
| substructure     | CHEMBL116297 |          | 0.875000   | 31600.0  | *        |
| graph            | CHEMBL352928 |          | 0.709790   | 1.0      |          |
| pubchem          | CHEMBL83001  |          | 0.836538   | 3700.0   | *        |
| cdk_maccs        | CHEMBL169291 |          | 0.760000   | 2.0      |          |
| klekota_roth     | CHEMBL163543 |          | 0.583942   | 115.0    |          |

```

*** ic50 ACTIVITY *** value prediction
    based on 9 locally validated fgps ---> 3323.134
["substructure", "Pattern", "AP_bits", "MFP1", "pubchem", "FP2",
"FeatMFP1", "RDKit7", "hybridization"]

```

6 rank

Tissue-type plasminogen activator : Homo sapiens

score: 6.267 on CHEMBL1873 based on 9 fingerprints

| Fingerprint type | Ligand       | Tanimoto | Similarity | activity | Valid fg |
|------------------|--------------|----------|------------|----------|----------|
| FeatMFP1         | CHEMBL282830 |          | 0.718750   | 495.0    | *        |
| MFP1             | CHEMBL27852  |          | 0.545455   | 93.0     | *        |
| RDKit7           | CHEMBL27852  |          | 0.705432   | 93.0     | *        |
| Pattern          | CHEMBL27852  |          | 0.847059   | 93.0     | *        |

|               |              |          |        |   |
|---------------|--------------|----------|--------|---|
| AP_bits       | CHEMBL27852  | 0.556497 | 93.0   | * |
| TT_bits       | CHEMBL27852  | 0.386792 | 93.0   |   |
| FP2           | CHEMBL27852  | 0.729730 | 93.0   | * |
| hybridization | CHEMBL27852  | 0.736089 | 93.0   | * |
| substructure  | CHEMBL162461 | 0.833333 | 4010.0 |   |
| graph         | CHEMBL27852  | 0.727941 | 93.0   |   |
| pubchem       | CHEMBL282830 | 0.830918 | 495.0  | * |
| cdk_maccs     | CHEMBL27852  | 0.716216 | 93.0   |   |
| klekota_roth  | CHEMBL282830 | 0.596639 | 495.0  | * |

\*\*\* ic50 ACTIVITY \*\*\* value prediction  
 based on 9 locally validated fgps ---> 317.917  
 ["Pattern", "AP\_bits", "MFP1", "klekota\_roth", "pubchem", "FP2",  
 "FeatMFP1", "RDKit7", "hybridization"]

7 rank

Plasminogen : Rattus norvegicus

score: 6.267 on ChEMBL3204 based on 9 fingerprints

| Fingerprint type | Ligand       | Tanimoto Similarity | activity | Valid fg |
|------------------|--------------|---------------------|----------|----------|
| FeatMFP1         | CHEMBL282830 | 0.718750            | 415.0    | *        |
| MFP1             | CHEMBL27852  | 0.545455            | 251.0    | *        |
| RDKit7           | CHEMBL27852  | 0.705432            | 251.0    | *        |
| Pattern          | CHEMBL27852  | 0.847059            | 251.0    | *        |
| AP_bits          | CHEMBL436851 | 0.556978            | 1320.0   | *        |
| TT_bits          | CHEMBL27852  | 0.386792            | 251.0    |          |
| FP2              | CHEMBL27852  | 0.729730            | 251.0    | *        |
| hybridization    | CHEMBL27852  | 0.736089            | 251.0    | *        |
| substructure     | CHEMBL27852  | 0.740741            | 251.0    |          |
| graph            | CHEMBL27852  | 0.727941            | 251.0    |          |
| pubchem          | CHEMBL282830 | 0.830918            | 415.0    | *        |
| cdk_maccs        | CHEMBL27852  | 0.716216            | 251.0    |          |
| klekota_roth     | CHEMBL282830 | 0.596639            | 415.0    | *        |

\*\*\* ic50 ACTIVITY \*\*\* value prediction  
 based on 9 locally validated fgps ---> 400.797  
 ["Pattern", "AP\_bits", "MFP1", "klekota\_roth", "pubchem", "FP2",  
 "FeatMFP1", "RDKit7", "hybridization"]

8 rank

Urokinase-type plasminogen activator : Homo sapiens

score: 6.267 on ChEMBL3286 based on 9 fingerprints

| Fingerprint type | Ligand       | Tanimoto Similarity | activity | Valid fg |
|------------------|--------------|---------------------|----------|----------|
| FeatMFP1         | CHEMBL282830 | 0.718750            | 600.0    | *        |
| MFP1             | CHEMBL27852  | 0.545455            | 335.0    | *        |
| RDKit7           | CHEMBL27852  | 0.705432            | 335.0    | *        |
| Pattern          | CHEMBL27852  | 0.847059            | 335.0    | *        |
| AP_bits          | CHEMBL27852  | 0.556497            | 335.0    | *        |
| TT_bits          | CHEMBL27852  | 0.386792            | 335.0    |          |
| FP2              | CHEMBL27852  | 0.729730            | 335.0    | *        |
| hybridization    | CHEMBL27852  | 0.736089            | 335.0    | *        |
| substructure     | CHEMBL27852  | 0.740741            | 335.0    |          |
| graph            | CHEMBL27852  | 0.727941            | 335.0    |          |
| pubchem          | CHEMBL282830 | 0.830918            | 600.0    | *        |
| cdk_maccs        | CHEMBL27852  | 0.716216            | 335.0    |          |
| klekota_roth     | CHEMBL282830 | 0.596639            | 600.0    | *        |

\*\*\* ic50 ACTIVITY \*\*\* value prediction  
 based on 9 locally validated fgps ---> 495.620  
 ["Pattern", "AP\_bits", "MFP1", "klekota\_roth", "pubchem", "FP2",  
 "FeatMFP1", "RDKit7", "hybridization"]

9 rank

Trypsin I : Bos taurus

score: 5.746 on ChEMBL3769 based on 8 fingerprints

| Fingerprint type | Ligand       | Tanimoto Similarity | activity | Valid fg |
|------------------|--------------|---------------------|----------|----------|
| FeatMFP1         | CHEMBL176329 | 0.709677            | 5.8      | *        |
| MFP1             | CHEMBL176329 | 0.545455            | 5.8      | *        |
| RDKit7           | CHEMBL176329 | 0.730906            | 5.8      | *        |
| Pattern          | CHEMBL176385 | 0.860947            | 352.0    | *        |
| AP_bits          | CHEMBL176329 | 0.626628            | 5.8      | *        |
| TT_bits          | CHEMBL176329 | 0.450000            | 5.8      |          |
| FP2              | CHEMBL176329 | 0.715556            | 5.8      | *        |
| hybridization    | CHEMBL176329 | 0.722222            | 5.8      | *        |
| substructure     | CHEMBL150497 | 0.833333            | 230.0    |          |
| graph            | CHEMBL176016 | 0.703971            | 32000.0  |          |
| pubchem          | CHEMBL176385 | 0.834951            | 352.0    | *        |
| cdk_maccs        | CHEMBL176329 | 0.763889            | 5.8      |          |
| klekota_roth     | CHEMBL176329 | 0.549618            | 5.8      |          |

\*\*\* ic50 ACTIVITY \*\*\* value prediction  
based on 8 locally validated fgps ---> 148.231  
["Pattern", "AP\_bits", "MFP1", "pubchem", "FP2", "FeatMFP1", "RDKit7", "hybridization"]

10 rank

Lysosomal Pro-X carboxypeptidase : Homo sapiens

score: 5.605 on ChEMBL2335 based on 8 fingerprints

| Fingerprint type | Ligand        | Tanimoto Similarity | activity | Valid fg |
|------------------|---------------|---------------------|----------|----------|
| FeatMFP1         | CHEMBL1256273 | 0.542857            | 850.0    |          |
| MFP1             | CHEMBL1256277 | 0.454545            | 240.0    |          |
| RDKit7           | CHEMBL1259114 | 0.742291            | 300.0    | *        |
| Pattern          | CHEMBL1256278 | 0.866856            | 570.0    | *        |
| AP_bits          | CHEMBL1256278 | 0.600291            | 570.0    | *        |
| TT_bits          | CHEMBL1259131 | 0.509804            | 5000.0   | *        |
| FP2              | CHEMBL1259114 | 0.753555            | 300.0    | *        |
| hybridization    | CHEMBL1259114 | 0.743760            | 300.0    | *        |
| substructure     | CHEMBL1256277 | 0.640000            | 240.0    |          |
| graph            | CHEMBL1259114 | 0.773946            | 300.0    | *        |
| pubchem          | CHEMBL1259175 | 0.799107            | 4370.0   |          |
| cdk_maccs        | CHEMBL1256277 | 0.684932            | 240.0    |          |
| klekota_roth     | CHEMBL1256277 | 0.614815            | 240.0    | *        |

\*\*\* ic50 ACTIVITY \*\*\* value prediction

based on 8 locally validated fgps ---> 2054.221

["TT\_bits", "Pattern", "AP\_bits", "klekota\_roth", "graph", "FP2", "RDKit7", "hybridization"]

11 rank

Tryptase beta-1 : Homo sapiens

score: 4.476 on ChEMBL2617 based on 7 fingerprints

| Fingerprint type | Ligand       | Tanimoto Similarity | activity | Valid fg |
|------------------|--------------|---------------------|----------|----------|
| FeatMFP1         | CHEMBL178315 | 0.656250            | 9090.0   |          |
| MFP1             | CHEMBL178315 | 0.576923            | 9090.0   | *        |
| RDKit7           | CHEMBL127185 | 0.705224            | 2.0      | *        |
| Pattern          | CHEMBL178315 | 0.809651            | 9090.0   |          |
| AP_bits          | CHEMBL361835 | 0.500597            | 12400.0  | *        |
| TT_bits          | CHEMBL178315 | 0.544554            | 9090.0   | *        |
| FP2              | CHEMBL127185 | 0.675926            | 2.0      | *        |
| hybridization    | CHEMBL127185 | 0.708819            | 2.0      | *        |
| substructure     | CHEMBL127185 | 0.800000            | 2.0      |          |
| graph            | CHEMBL127185 | 0.752852            | 2.0      |          |
| pubchem          | CHEMBL127185 | 0.754902            | 2.0      |          |
| cdk_maccs        | CHEMBL178315 | 0.783784            | 9090.0   |          |
| klekota_roth     | CHEMBL178315 | 0.763780            | 9090.0   | *        |

\*\*\* ic50 ACTIVITY \*\*\* value prediction

based on 7 locally validated fgps ---> 4628.473  
["TT\_bits", "AP\_bits", "MFP1", "klekota\_roth", "FP2", "RDKit7",  
"hybridization"]



# SwissTargetPrediction report:

## Reference:

Gfeller D., Michielin O. & Zoete V.  
 Shaping the interaction landscape of  
 bioactive molecules, *Bioinformatics*  
 (2013) 29:3073-3079.

## Query Molecule

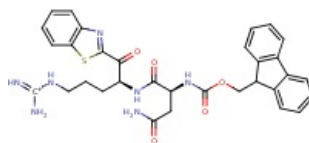

## Frequency of Target Class

| Target                                                    | Uniprot ID | Gene code | ChEMBL ID     | Probability            | # sim. cmpds (3D / 2D) | Target Class    |
|-----------------------------------------------------------|------------|-----------|---------------|------------------------|------------------------|-----------------|
| Activation peptide fragment 1                             | P00734     | F2        | CHEMBL204     | <div><div></div></div> | 1464 / 332             | Serine Protease |
| Alpha-trypsin chain 1 ( <i>by homology</i> )              | P07477     | PRSS1     | CHEMBL209     | <div><div></div></div> | 622 / 132              | Serine Protease |
| Trypsin-3 ( <i>by homology</i> )                          | P35030     | PRSS3     | CHEMBL4551    | <div><div></div></div> | 622 / 132              | Serine Protease |
| Trypsin-2 ( <i>by homology</i> )                          | P07478     | PRSS2     | CHEMBL3159    | <div><div></div></div> | 622 / 132              | Serine Protease |
| Coagulation factor IXa heavy chain ( <i>by homology</i> ) | P00740     | F9        | CHEMBL2016    | <div><div></div></div> | 1257 / 152             | Serine Protease |
| Factor X light chain                                      | P00742     | F10       | CHEMBL244     | <div><div></div></div> | 1257 / 152             | Serine Protease |
| Coagulation factor VII                                    | P08709     | F7        | CHEMBL3991    | <div><div></div></div> | 1241 / 152             | Serine Protease |
| Plasmin light chain B                                     | P00747     | PLG       | CHEMBL1801    | <div><div></div></div> | 268 / 8                | Serine Protease |
| Apolipoprotein(a) ( <i>by homology</i> )                  | P08519     | LPA       |               | <div><div></div></div> | 268 / 8                | Serine Protease |
| Transmembrane protease serine 11D non-catalytic chain     | O60235     | TMPRSS11D | CHEMBL1795138 | <div><div></div></div> | 33 / 1                 | Enzyme          |
| Transmembrane protease serine 11A ( <i>by homology</i> )  | Q6ZMR5     | TMPRSS11A |               | <div><div></div></div> | 33 / 1                 | Enzyme          |
| Transmembrane protease serine 11F ( <i>by homology</i> )  | Q6ZWK6     | TMPRSS11F |               | <div><div></div></div> | 33 / 1                 | Enzyme          |
| Transmembrane protease serine 11B ( <i>by homology</i> )  | Q86T26     | TMPRSS11B |               | <div><div></div></div> | 33 / 1                 | Enzyme          |
| Transmembrane protease serine 11E ( <i>by homology</i> )  | Q9UL52     | TMPRSS11E |               | <div><div></div></div> | 33 / 1                 | Enzyme          |
| Urokinase-type plasminogen activator long chain A         | P00749     | PLAU      | CHEMBL3286    | <div><div></div></div> | 181 / 2                | Serine Protease |

## Polypharmacology Browser 2 Prediction:

## Targets predicted using NN(ECfp4) + NB(ECfp4).

Save Table

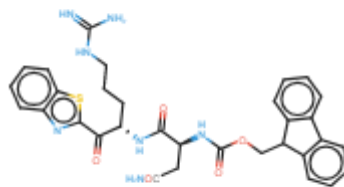

Query molecule

## Target class overview

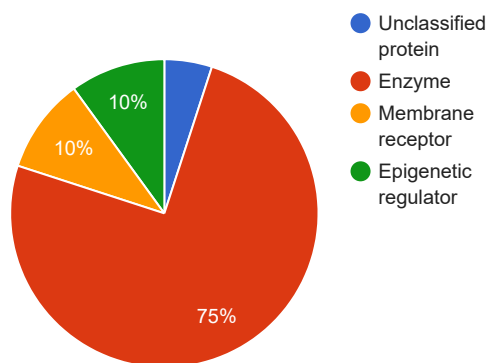

| Rank | ChEMBL ID                                                                                                                                           | Common name                          | Nearest neighbours |
|------|-----------------------------------------------------------------------------------------------------------------------------------------------------|--------------------------------------|--------------------|
| 1    | CHEMBL3018 ( <a href="https://www.ebi.ac.uk/chembl/target/inspect/CHEMBL3018">https://www.ebi.ac.uk/chembl/target/inspect/CHEMBL3018</a> )          | Matriptase                           | Show NN            |
| 2    | CHEMBL209 ( <a href="https://www.ebi.ac.uk/chembl/target/inspect/CHEMBL209">https://www.ebi.ac.uk/chembl/target/inspect/CHEMBL209</a> )             | Trypsin I                            | Show NN            |
| 3    | CHEMBL1795139 ( <a href="https://www.ebi.ac.uk/chembl/target/inspect/CHEMBL1795139">https://www.ebi.ac.uk/chembl/target/inspect/CHEMBL1795139</a> ) | Transmembrane protease serine 6      | Show NN            |
| 4    | CHEMBL204 ( <a href="https://www.ebi.ac.uk/chembl/target/inspect/CHEMBL204">https://www.ebi.ac.uk/chembl/target/inspect/CHEMBL204</a> )             | Thrombin                             | Show NN            |
| 5    | CHEMBL244 ( <a href="https://www.ebi.ac.uk/chembl/target/inspect/CHEMBL244">https://www.ebi.ac.uk/chembl/target/inspect/CHEMBL244</a> )             | Coagulation factor X                 | Show NN            |
| 6    | CHEMBL3991 ( <a href="https://www.ebi.ac.uk/chembl/target/inspect/CHEMBL3991">https://www.ebi.ac.uk/chembl/target/inspect/CHEMBL3991</a> )          | Coagulation factor VII               | Show NN            |
| 7    | CHEMBL2617 ( <a href="https://www.ebi.ac.uk/chembl/target/inspect/CHEMBL2617">https://www.ebi.ac.uk/chembl/target/inspect/CHEMBL2617</a> )          | Tryptase beta-1                      | Show NN            |
| 8    | CHEMBL270 ( <a href="https://www.ebi.ac.uk/chembl/target/inspect/CHEMBL270">https://www.ebi.ac.uk/chembl/target/inspect/CHEMBL270</a> )             | Mu opioid receptor                   | Show NN            |
| 9    | CHEMBL325 ( <a href="https://www.ebi.ac.uk/chembl/target/inspect/CHEMBL325">https://www.ebi.ac.uk/chembl/target/inspect/CHEMBL325</a> )             | Histone deacetylase 1                | Show NN            |
| 10   | CHEMBL2079849 ( <a href="https://www.ebi.ac.uk/chembl/target/inspect/CHEMBL2079849">https://www.ebi.ac.uk/chembl/target/inspect/CHEMBL2079849</a> ) | Serine protease hepsin               | Show NN            |
| 11   | CHEMBL3351190 ( <a href="https://www.ebi.ac.uk/chembl/target/inspect/CHEMBL3351190">https://www.ebi.ac.uk/chembl/target/inspect/CHEMBL3351190</a> ) | Hepatocyte growth factor activator   | Show NN            |
| 12   | CHEMBL3286 ( <a href="https://www.ebi.ac.uk/chembl/target/inspect/CHEMBL3286">https://www.ebi.ac.uk/chembl/target/inspect/CHEMBL3286</a> )          | Urokinase-type plasminogen activator | Show NN            |
| 13   | CHEMBL2000 ( <a href="https://www.ebi.ac.uk/chembl/target/inspect/CHEMBL2000">https://www.ebi.ac.uk/chembl/target/inspect/CHEMBL2000</a> )          | Plasma kallikrein                    | Show NN            |
| 14   | CHEMBL2820 ( <a href="https://www.ebi.ac.uk/chembl/target/inspect/CHEMBL2820">https://www.ebi.ac.uk/chembl/target/inspect/CHEMBL2820</a> )          | Coagulation factor XI                | Show NN            |
| 15   | CHEMBL4777 ( <a href="https://www.ebi.ac.uk/chembl/target/inspect/CHEMBL4777">https://www.ebi.ac.uk/chembl/target/inspect/CHEMBL4777</a> )          | Neuropeptide Y receptor type 1       | Show NN            |
| 16   | CHEMBL1801 ( <a href="https://www.ebi.ac.uk/chembl/target/inspect/CHEMBL1801">https://www.ebi.ac.uk/chembl/target/inspect/CHEMBL1801</a> )          | Plasminogen                          | Show NN            |
| 17   | CHEMBL1865 ( <a href="https://www.ebi.ac.uk/chembl/target/inspect/CHEMBL1865">https://www.ebi.ac.uk/chembl/target/inspect/CHEMBL1865</a> )          | Histone deacetylase 6                | Show NN            |
| 18   | CHEMBL333 ( <a href="https://www.ebi.ac.uk/chembl/target/inspect/CHEMBL333">https://www.ebi.ac.uk/chembl/target/inspect/CHEMBL333</a> )             | Matrix metalloproteinase-2           | Show NN            |

|    |                                                                                                                                            |                            |         |
|----|--------------------------------------------------------------------------------------------------------------------------------------------|----------------------------|---------|
| 19 | CHEMBL4822 ( <a href="https://www.ebi.ac.uk/chembl/target/inspect/CHEMBL4822">https://www.ebi.ac.uk/chembl/target/inspect/CHEMBL4822</a> ) | Beta-secretase 1           | Show NN |
| 20 | CHEMBL332 ( <a href="https://www.ebi.ac.uk/chembl/target/inspect/CHEMBL332">https://www.ebi.ac.uk/chembl/target/inspect/CHEMBL332</a> )    | Matrix metalloproteinase-1 | Show NN |
