# Supplementary material for: Accelerating Drug Discovery by Early Protein Drug Target Prediction Based on a Multi-Fingerprint Similarity Search
Source: MDPI journal article supplement (doi:10.3390/molecules24122233), 2019-06-14
Supplement: s1 [file s1]

## MuSSEL Prediction k<sub>i</sub>:

1 rank

Sigma-1 receptor : *Cavia porcellus*

score: 6.867 on ChEMBL4153 based on 9 fingerprints

| Fingerprint type | Ligand        | Tanimoto | Similarity | activity | Valid fg |
|------------------|---------------|----------|------------|----------|----------|
| FeatMFP1         | CHEMBL244449  |          | 0.739130   | 175.00   |          |
| MFP1             | CHEMBL1645207 |          | 0.600000   | 0.71     | *        |
| RDKit7           | CHEMBL1780001 |          | 0.741107   | 107.00   |          |
| Pattern          | CHEMBL1780001 |          | 0.902857   | 107.00   | *        |
| AP_bits          | CHEMBL574235  |          | 0.564955   | 37.00    | *        |
| TT_bits          | CHEMBL1171865 |          | 0.677419   | 9.00     | *        |
| FP2              | CHEMBL1171865 |          | 0.699115   | 9.00     |          |
| hybridization    | CHEMBL1779993 |          | 0.712644   | 538.00   | *        |
| substructure     | CHEMBL1645202 |          | 1.000000   | 0.59     | *        |
| graph            | CHEMBL1672034 |          | 0.698113   | 13.60    |          |
| pubchem          | CHEMBL1645207 |          | 0.858333   | 0.71     | *        |
| cdk_maccs        | CHEMBL1645207 |          | 0.840000   | 0.71     | *        |
| klekota_roth     | CHEMBL1780001 |          | 0.710843   | 107.00   | *        |

\*\*\* ki ACTIVITY \*\*\* value prediction

based on 9 locally validated fgps ---> 115.852

["TT\_bits", "substructure", "Pattern", "MFP1", "klekota\_roth", "pubchem", "AP\_bits", "cdk\_maccs", "hybridization"]

2 rank

Sigma opioid receptor : *Rattus norvegicus*

score: 4.465 on ChEMBL3602 based on 6 fingerprints

| Fingerprint type | Ligand        | Tanimoto | Similarity | activity | Valid fg |
|------------------|---------------|----------|------------|----------|----------|
| FeatMFP1         | CHEMBL281594  |          | 0.600000   | 116.0    |          |
| MFP1             | CHEMBL144662  |          | 0.527778   | 8460.0   |          |
| RDKit7           | CHEMBL344348  |          | 0.658977   | 4360.0   |          |
| Pattern          | CHEMBL140030  |          | 0.917137   | 9890.0   | *        |
| AP_bits          | CHEMBL1162973 |          | 0.552553   | 13.6     | *        |
| TT_bits          | CHEMBL144662  |          | 0.552239   | 8460.0   | *        |
| FP2              | CHEMBL344348  |          | 0.616667   | 4360.0   |          |
| hybridization    | CHEMBL344348  |          | 0.581921   | 4360.0   |          |
| substructure     | CHEMBL2346998 |          | 0.937500   | 37.5     | *        |
| graph            | CHEMBL3740764 |          | 0.663636   | 614.0    |          |
| pubchem          | CHEMBL344348  |          | 0.846774   | 4360.0   |          |
| cdk_maccs        | CHEMBL366388  |          | 0.843137   | 30.0     | *        |
| klekota_roth     | CHEMBL1162973 |          | 0.662651   | 13.6     | *        |

\*\*\* ki ACTIVITY \*\*\* value prediction

based on 6 locally validated fgps ---> 4135.774

["TT\_bits", "substructure", "klekota\_roth", "AP\_bits", "Pattern", "cdk\_maccs"]

3 rank

Sigma opioid receptor : *Homo sapiens*

score: 3.730 on ChEMBL287 based on 5 fingerprints

| Fingerprint type | Ligand        | Tanimoto | Similarity | activity | Valid fg |
|------------------|---------------|----------|------------|----------|----------|
| FeatMFP1         | CHEMBL312766  |          | 0.652174   | 0.52     |          |
| MFP1             | CHEMBL1645202 |          | 0.542857   | 0.59     |          |
| RDKit7           | CHEMBL344348  |          | 0.658977   | 148.00   |          |
| Pattern          | CHEMBL140030  |          | 0.917137   | 95.30    | *        |
| AP_bits          | CHEMBL75608   |          | 0.581081   | 0.61     | *        |
| TT_bits          | CHEMBL144662  |          | 0.552239   | 12.70    | *        |
| FP2              | CHEMBL344348  |          | 0.616667   | 148.00   |          |
| hybridization    | CHEMBL344348  |          | 0.581921   | 148.00   |          |
| substructure     | CHEMBL1645202 |          | 1.000000   | 0.59     | *        |
| graph            | CHEMBL80968   |          | 0.676471   | 12.00    |          |
| pubchem          | CHEMBL344348  |          | 0.846774   | 148.00   |          |
| cdk_maccs        | CHEMBL61479   |          | 0.821429   | 17.00    |          |

```

klekota_roth      CHEMBL75608          0.679487      0.61      *
  *** ki ACTIVITY *** value prediction
    based on 5 locally validated fgps ---> 36.244
["Pattern", "klekota_roth", "TT_bits", "substructure", "AP_bits"]

```

4 rank

Dopamine D2 receptor : Rattus norvegicus

score: 2.943 on CHEMBL339 based on 4 fingerprints

| Fingerprint type | Ligand        | Tanimoto | Similarity | activity | Valid fg |
|------------------|---------------|----------|------------|----------|----------|
| FeatMFP1         | CHEMBL70540   |          | 0.652174   | 11993.00 |          |
| MFP1             | CHEMBL127216  |          | 0.444444   | 194.98   |          |
| RDKit7           | CHEMBL420972  |          | 0.555345   | 5540.00  |          |
| Pattern          | CHEMBL391272  |          | 0.815789   | 1170.00  |          |
| AP_bits          | CHEMBL77220   |          | 0.558824   | 3670.00  | *        |
| TT_bits          | CHEMBL75444   |          | 0.333333   | 479.00   |          |
| FP2              | CHEMBL544099  |          | 0.578947   | 4610.00  |          |
| hybridization    | CHEMBL420604  |          | 0.511568   | 4680.00  |          |
| substructure     | CHEMBL1672302 |          | 0.875000   | 6.90     | *        |
| graph            | CHEMBL142668  |          | 0.707965   | 407.38   |          |
| pubchem          | CHEMBL81330   |          | 0.786765   | 160.00   |          |
| cdk_maccs        | CHEMBL81330   |          | 0.830189   | 160.00   | *        |
| klekota_roth     | CHEMBL75878   |          | 0.679012   | 4260.00  | *        |

\*\*\* ki ACTIVITY \*\*\* value prediction

based on 4 locally validated fgps ---> 1323.175

["AP\_bits", "klekota\_roth", "substructure", "cdk\_maccs"]

5 rank

Serotonin 1a (5-HT1a) receptor : Rattus norvegicus

score: 2.933 on CHEMBL273 based on 4 fingerprints

| Fingerprint type | Ligand       | Tanimoto | Similarity | activity | Valid fg |
|------------------|--------------|----------|------------|----------|----------|
| FeatMFP1         | CHEMBL314997 |          | 0.600000   | 24.300   |          |
| MFP1             | CHEMBL127216 |          | 0.444444   | 3.802    |          |
| RDKit7           | CHEMBL542436 |          | 0.538182   | 54.100   |          |
| Pattern          | CHEMBL543219 |          | 0.782759   | 37.000   |          |
| AP_bits          | CHEMBL53325  |          | 0.552553   | 28.600   | *        |
| TT_bits          | CHEMBL28110  |          | 0.352113   | 64.000   |          |
| FP2              | CHEMBL542436 |          | 0.578125   | 54.100   |          |
| hybridization    | CHEMBL542436 |          | 0.490338   | 54.100   |          |
| substructure     | CHEMBL281923 |          | 0.875000   | 17.000   | *        |
| graph            | CHEMBL485728 |          | 0.663462   | 183.000  |          |
| pubchem          | CHEMBL81330  |          | 0.786765   | 120.000  |          |
| cdk_maccs        | CHEMBL366388 |          | 0.843137   | 17.000   | *        |
| klekota_roth     | CHEMBL53325  |          | 0.662651   | 28.600   | *        |

\*\*\* ki ACTIVITY \*\*\* value prediction

based on 4 locally validated fgps ---> 35.575

["AP\_bits", "klekota\_roth", "substructure", "cdk\_maccs"]

# SwissTargetPrediction report:

## Reference:

Gfeller D., Michielin O. & Zoete V.  
Shaping the interaction landscape of  
bioactive molecules, *Bioinformatics*  
(2013) 29:3073-3079.

## Query Molecule

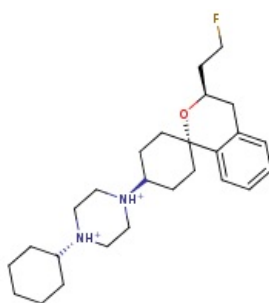

## Frequency of Target Class

| Target                                                                                               | Uniprot ID | Gene code | ChEMBL ID  | Probability            | # sim. cmpds (3D / 2D) | Target Class      |
|------------------------------------------------------------------------------------------------------|------------|-----------|------------|------------------------|------------------------|-------------------|
| Sigma non-opioid intracellular receptor 1                                                            | Q99720     | SIGMAR1   | CHEMBL287  | <div><div></div></div> | 205 / 73               | Membrane receptor |
| Sodium-dependent noradrenaline transporter ( <i>by homology</i> )                                    | P23975     | SLC6A2    | CHEMBL222  | <div><div></div></div> | 508 / 227              | Transporter       |
| Sodium-dependent serotonin transporter ( <i>by homology</i> )                                        | P31645     | SLC6A4    | CHEMBL228  | <div><div></div></div> | 520 / 215              | Transporter       |
| Sodium-dependent dopamine transporter                                                                | Q01959     | SLC6A3    | CHEMBL238  | <div><div></div></div> | 508 / 227              | Transporter       |
| D(2) dopamine receptor ( <i>by homology</i> )                                                        | P14416     | DRD2      | CHEMBL217  | <div><div></div></div> | 427 / 83               | Membrane receptor |
| Sodium- and chloride-dependent glycine transporter 1 ( <i>by homology</i> )                          | P48067     | SLC6A9    | CHEMBL2337 | <div><div></div></div> | 241 / 110              | Transporter       |
| Sodium- and chloride-dependent glycine transporter 2 ( <i>by homology</i> )                          | Q9Y345     | SLC6A5    | CHEMBL3060 | <div><div></div></div> | 241 / 110              | Transporter       |
| Sodium-dependent proline transporter ( <i>by homology</i> )                                          | Q99884     | SLC6A7    |            | <div><div></div></div> | 241 / 110              | Transporter       |
| Sodium- and chloride-dependent neutral and basic amino acid transporter B(0+) ( <i>by homology</i> ) | Q9UN76     | SLC6A14   |            | <div><div></div></div> | 241 / 110              | Transporter       |
| D(3) dopamine receptor ( <i>by homology</i> )                                                        | P35462     | DRD3      | CHEMBL234  | <div><div></div></div> | 280 / 26               | Membrane receptor |
| D(4) dopamine receptor                                                                               | P21917     | DRD4      | CHEMBL219  | <div><div></div></div> | 204 / 15               | Membrane receptor |
| 5-hydroxytryptamine receptor 2A ( <i>by homology</i> )                                               | P28223     | HTR2A     | CHEMBL224  | <div><div></div></div> | 187 / 36               | Membrane receptor |
| 5-hydroxytryptamine receptor 2C                                                                      | P28335     | HTR2C     | CHEMBL225  | <div><div></div></div> | 135 / 31               | Membrane receptor |
| 5-hydroxytryptamine receptor 2B                                                                      | P41595     | HTR2B     | CHEMBL1833 | <div><div></div></div> | 135 / 31               | Membrane receptor |
| 5-hydroxytryptamine receptor 1A                                                                      | P08908     | HTR1A     | CHEMBL214  | <div><div></div></div> | 212 / 23               | Membrane receptor |

# Polypharmacology Browser 2 Prediction:

Targets predicted using NN(ECfp4) + NB(ECfp4).

Save Table

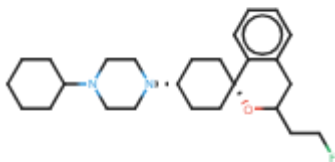

Query molecule

Target class overview

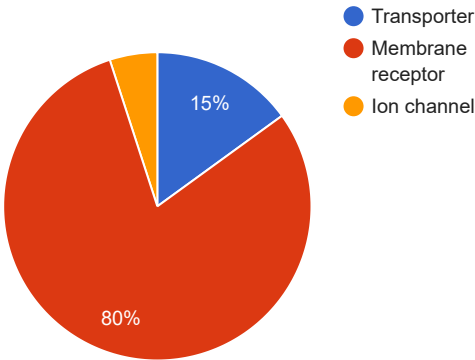

| Rank | ChEMBL ID                                                                                                                                  | Common name                          | Nearest neighbours |
|------|--------------------------------------------------------------------------------------------------------------------------------------------|--------------------------------------|--------------------|
| 1    | CHEMBL3602 ( <a href="https://www.ebi.ac.uk/chembl/target/inspect/CHEMBL3602">https://www.ebi.ac.uk/chembl/target/inspect/CHEMBL3602</a> ) | Sigma opioid receptor                | Show NN            |
| 2    | CHEMBL287 ( <a href="https://www.ebi.ac.uk/chembl/target/inspect/CHEMBL287">https://www.ebi.ac.uk/chembl/target/inspect/CHEMBL287</a> )    | Sigma opioid receptor                | Show NN            |
| 3    | CHEMBL339 ( <a href="https://www.ebi.ac.uk/chembl/target/inspect/CHEMBL339">https://www.ebi.ac.uk/chembl/target/inspect/CHEMBL339</a> )    | Dopamine D2 receptor                 | Show NN            |
| 4    | CHEMBL217 ( <a href="https://www.ebi.ac.uk/chembl/target/inspect/CHEMBL217">https://www.ebi.ac.uk/chembl/target/inspect/CHEMBL217</a> )    | Dopamine D2 receptor                 | Show NN            |
| 5    | CHEMBL237 ( <a href="https://www.ebi.ac.uk/chembl/target/inspect/CHEMBL237">https://www.ebi.ac.uk/chembl/target/inspect/CHEMBL237</a> )    | Kappa opioid receptor                | Show NN            |
| 6    | CHEMBL233 ( <a href="https://www.ebi.ac.uk/chembl/target/inspect/CHEMBL233">https://www.ebi.ac.uk/chembl/target/inspect/CHEMBL233</a> )    | Mu opioid receptor                   | Show NN            |
| 7    | CHEMBL264 ( <a href="https://www.ebi.ac.uk/chembl/target/inspect/CHEMBL264">https://www.ebi.ac.uk/chembl/target/inspect/CHEMBL264</a> )    | Histamine H3 receptor                | Show NN            |
| 8    | CHEMBL240 ( <a href="https://www.ebi.ac.uk/chembl/target/inspect/CHEMBL240">https://www.ebi.ac.uk/chembl/target/inspect/CHEMBL240</a> )    | HERG                                 | Show NN            |
| 9    | CHEMBL236 ( <a href="https://www.ebi.ac.uk/chembl/target/inspect/CHEMBL236">https://www.ebi.ac.uk/chembl/target/inspect/CHEMBL236</a> )    | Delta opioid receptor                | Show NN            |
| 10   | CHEMBL214 ( <a href="https://www.ebi.ac.uk/chembl/target/inspect/CHEMBL214">https://www.ebi.ac.uk/chembl/target/inspect/CHEMBL214</a> )    | Serotonin 1a (5-HT1a) receptor       | Show NN            |
| 11   | CHEMBL4767 ( <a href="https://www.ebi.ac.uk/chembl/target/inspect/CHEMBL4767">https://www.ebi.ac.uk/chembl/target/inspect/CHEMBL4767</a> ) | Vesicular acetylcholine transporter  | Show NN            |
| 12   | CHEMBL216 ( <a href="https://www.ebi.ac.uk/chembl/target/inspect/CHEMBL216">https://www.ebi.ac.uk/chembl/target/inspect/CHEMBL216</a> )    | Muscarinic acetylcholine receptor M1 | Show NN            |
| 13   | CHEMBL273 ( <a href="https://www.ebi.ac.uk/chembl/target/inspect/CHEMBL273">https://www.ebi.ac.uk/chembl/target/inspect/CHEMBL273</a> )    | Serotonin 1a (5-HT1a) receptor       | Show NN            |
| 14   | CHEMBL224 ( <a href="https://www.ebi.ac.uk/chembl/target/inspect/CHEMBL224">https://www.ebi.ac.uk/chembl/target/inspect/CHEMBL224</a> )    | Serotonin 2a (5-HT2a) receptor       | Show NN            |
| 15   | CHEMBL2014 ( <a href="https://www.ebi.ac.uk/chembl/target/inspect/CHEMBL2014">https://www.ebi.ac.uk/chembl/target/inspect/CHEMBL2014</a> ) | Nociceptin receptor                  | Show NN            |
| 16   | CHEMBL228 ( <a href="https://www.ebi.ac.uk/chembl/target/inspect/CHEMBL228">https://www.ebi.ac.uk/chembl/target/inspect/CHEMBL228</a> )    | Serotonin transporter                | Show NN            |
| 17   | CHEMBL211 ( <a href="https://www.ebi.ac.uk/chembl/target/inspect/CHEMBL211">https://www.ebi.ac.uk/chembl/target/inspect/CHEMBL211</a> )    | Muscarinic acetylcholine receptor M2 | Show NN            |
| 18   | CHEMBL245 ( <a href="https://www.ebi.ac.uk/chembl/target/inspect/CHEMBL245">https://www.ebi.ac.uk/chembl/target/inspect/CHEMBL245</a> )    | Muscarinic acetylcholine receptor M3 | Show NN            |

|    |                                                                                                                                         |                       |         |
|----|-----------------------------------------------------------------------------------------------------------------------------------------|-----------------------|---------|
| 19 | CHEMBL313 ( <a href="https://www.ebi.ac.uk/chembl/target/inspect/CHEMBL313">https://www.ebi.ac.uk/chembl/target/inspect/CHEMBL313</a> ) | Serotonin transporter | Show NN |
| 20 | CHEMBL234 ( <a href="https://www.ebi.ac.uk/chembl/target/inspect/CHEMBL234">https://www.ebi.ac.uk/chembl/target/inspect/CHEMBL234</a> ) | Dopamine D3 receptor  | Show NN |
