# Supplementary material for: Accelerating Drug Discovery by Early Protein Drug Target Prediction Based on a Multi-Fingerprint Similarity Search
Source: MDPI journal article supplement (doi:10.3390/molecules24122233), 2019-06-14
Supplement: s1 [file s1]

## MuSSEL Prediction k<sub>i</sub>:

1 rank

Vascular endothelial growth factor receptor 3 : Homo sapiens

score: 7.106 on ChEMBL1955 based on 9 fingerprints

| Fingerprint type | Ligand        | Tanimoto | Similarity | activity | Valid fg |
|------------------|---------------|----------|------------|----------|----------|
| FeatMFP1         | ChEMBL939     |          | 0.750000   | 6309.57  | *        |
| MFP1             | ChEMBL939     |          | 0.688889   | 6309.57  | *        |
| RDKit7           | ChEMBL939     |          | 0.805133   | 6309.57  | *        |
| Pattern          | ChEMBL124660  |          | 0.861301   | 3162.28  | *        |
| AP_bits          | ChEMBL215152  |          | 0.516266   | 1258.93  |          |
| TT_bits          | ChEMBL939     |          | 0.635135   | 6309.57  | *        |
| FP2              | ChEMBL939     |          | 0.782313   | 6309.57  | *        |
| hybridization    | ChEMBL939     |          | 0.816471   | 6309.57  | *        |
| substructure     | ChEMBL1825138 |          | 0.818182   | 1584.89  |          |
| graph            | ChEMBL939     |          | 0.777778   | 6309.57  |          |
| pubchem          | ChEMBL939     |          | 0.925764   | 6309.57  | *        |
| cdk_maccs        | ChEMBL939     |          | 0.840580   | 6309.57  | *        |
| klekota_roth     | ChEMBL939     |          | 0.600000   | 6309.57  |          |

\*\*\* ki ACTIVITY \*\*\* value prediction

based on 9 locally validated fgps ---> 5792.373

["TT\_bits", "cdk\_maccs", "Pattern", "MFP1", "pubchem", "FP2", "FeatMFP1", "RDKit7", "hybridization"]

2 rank

Tyrosine-protein kinase LCK : Homo sapiens

score: 6.797 on ChEMBL258 based on 9 fingerprints

| Fingerprint type | Ligand       | Tanimoto | Similarity | activity | Valid fg |
|------------------|--------------|----------|------------|----------|----------|
| FeatMFP1         | ChEMBL939    |          | 0.750000   | 398.11   | *        |
| MFP1             | ChEMBL939    |          | 0.688889   | 398.11   | *        |
| RDKit7           | ChEMBL939    |          | 0.805133   | 398.11   | *        |
| Pattern          | ChEMBL202721 |          | 0.856637   | 63.10    |          |
| AP_bits          | ChEMBL202721 |          | 0.547865   | 63.10    | *        |
| TT_bits          | ChEMBL939    |          | 0.635135   | 398.11   | *        |
| FP2              | ChEMBL939    |          | 0.782313   | 398.11   | *        |
| hybridization    | ChEMBL939    |          | 0.816471   | 398.11   | *        |
| substructure     | ChEMBL230686 |          | 0.850000   | 29.40    |          |
| graph            | ChEMBL939    |          | 0.777778   | 398.11   |          |
| pubchem          | ChEMBL939    |          | 0.925764   | 398.11   | *        |
| cdk_maccs        | ChEMBL24828  |          | 0.845070   | 39.81    | *        |
| klekota_roth     | ChEMBL939    |          | 0.600000   | 398.11   |          |

\*\*\* ki ACTIVITY \*\*\* value prediction

based on 9 locally validated fgps ---> 340.928

["TT\_bits", "cdk\_maccs", "AP\_bits", "MFP1", "pubchem", "FP2", "FeatMFP1", "RDKit7", "hybridization"]

3 rank

Mitogen-activated protein kinase kinase kinase 5 : Homo sapiens

score: 6.797 on ChEMBL4852 based on 9 fingerprints

| Fingerprint type | Ligand       | Tanimoto | Similarity | activity | Valid fg |
|------------------|--------------|----------|------------|----------|----------|
| FeatMFP1         | ChEMBL939    |          | 0.750000   | 1584.89  | *        |
| MFP1             | ChEMBL939    |          | 0.688889   | 1584.89  | *        |
| RDKit7           | ChEMBL939    |          | 0.805133   | 1584.89  | *        |
| Pattern          | ChEMBL202721 |          | 0.856637   | 31.62    |          |
| AP_bits          | ChEMBL202721 |          | 0.547865   | 31.62    | *        |
| TT_bits          | ChEMBL939    |          | 0.635135   | 1584.89  | *        |
| FP2              | ChEMBL939    |          | 0.782313   | 1584.89  | *        |
| hybridization    | ChEMBL939    |          | 0.816471   | 1584.89  | *        |
| substructure     | ChEMBL95692  |          | 0.850000   | 1584.89  |          |
| graph            | ChEMBL939    |          | 0.777778   | 1584.89  |          |
| pubchem          | ChEMBL939    |          | 0.925764   | 1584.89  | *        |
| cdk_maccs        | ChEMBL24828  |          | 0.845070   | 316.23   | *        |

```

    klekota_roth      CHEMBL939      0.600000    1584.89
    *** ki ACTIVITY *** value prediction
    based on 9 locally validated fgps ---> 1341.636
    ["TT_bits", "cdk_maccs", "AP_bits", "MFP1", "pubchem", "FP2", "FeatMFP1",
    "RDKit7", "hybridization"]

```

4 rank

MAP kinase p38 alpha : Homo sapiens

score: 6.249 on ChEMBL260 based on 8 fingerprints

| Fingerprint type | Ligand        | Tanimoto | Similarity | activity | Valid | fg |
|------------------|---------------|----------|------------|----------|-------|----|
| FeatMFP1         | CHEMBL939     |          | 0.750000   | 501.19   |       | *  |
| MFP1             | CHEMBL939     |          | 0.688889   | 501.19   |       | *  |
| RDKit7           | CHEMBL939     |          | 0.805133   | 501.19   |       | *  |
| Pattern          | CHEMBL939     |          | 0.822785   | 501.19   |       |    |
| AP_bits          | CHEMBL1256039 |          | 0.509091   | 885.00   |       |    |
| TT_bits          | CHEMBL939     |          | 0.635135   | 501.19   |       | *  |
| FP2              | CHEMBL939     |          | 0.782313   | 501.19   |       | *  |
| hybridization    | CHEMBL939     |          | 0.816471   | 501.19   |       | *  |
| substructure     | CHEMBL95692   |          | 0.850000   | 36.00    |       |    |
| graph            | CHEMBL939     |          | 0.777778   | 501.19   |       |    |
| pubchem          | CHEMBL939     |          | 0.925764   | 501.19   |       | *  |
| cdk_maccs        | CHEMBL24828   |          | 0.845070   | 2511.89  |       | *  |
| klekota_roth     | CHEMBL939     |          | 0.600000   | 501.19   |       |    |

```

    *** ki ACTIVITY *** value prediction
    based on 8 locally validated fgps ---> 627.194
    ["TT_bits", "cdk_maccs", "MFP1", "pubchem", "FP2", "FeatMFP1", "RDKit7",
    "hybridization"]

```

5 rank

Tyrosine-protein kinase receptor UFO : Homo sapiens

score: 6.249 on ChEMBL4895 based on 8 fingerprints

| Fingerprint type | Ligand        | Tanimoto | Similarity | activity | Valid | fg |
|------------------|---------------|----------|------------|----------|-------|----|
| FeatMFP1         | CHEMBL939     |          | 0.750000   | 1584.890 |       | *  |
| MFP1             | CHEMBL939     |          | 0.688889   | 1584.890 |       | *  |
| RDKit7           | CHEMBL939     |          | 0.805133   | 1584.890 |       | *  |
| Pattern          | CHEMBL1983268 |          | 0.824959   | 39.810   |       |    |
| AP_bits          | CHEMBL939     |          | 0.507317   | 1584.890 |       |    |
| TT_bits          | CHEMBL939     |          | 0.635135   | 1584.890 |       | *  |
| FP2              | CHEMBL939     |          | 0.782313   | 1584.890 |       | *  |
| hybridization    | CHEMBL939     |          | 0.816471   | 1584.890 |       | *  |
| substructure     | CHEMBL1825138 |          | 0.818182   | 5.012    |       |    |
| graph            | CHEMBL939     |          | 0.777778   | 1584.890 |       |    |
| pubchem          | CHEMBL939     |          | 0.925764   | 1584.890 |       | *  |
| cdk_maccs        | CHEMBL24828   |          | 0.845070   | 251.190  |       | *  |
| klekota_roth     | CHEMBL939     |          | 0.600000   | 1584.890 |       |    |

```

    *** ki ACTIVITY *** value prediction
    based on 8 locally validated fgps ---> 1501.312
    ["TT_bits", "cdk_maccs", "MFP1", "pubchem", "FP2", "FeatMFP1", "RDKit7",
    "hybridization"]

```

6 rank

Mitogen-activated protein kinase kinase kinase kinase 4 : Homo sapiens

score: 6.249 on ChEMBL6166 based on 8 fingerprints

| Fingerprint type | Ligand        | Tanimoto | Similarity | activity | Valid | fg |
|------------------|---------------|----------|------------|----------|-------|----|
| FeatMFP1         | CHEMBL939     |          | 0.750000   | 1000.00  |       | *  |
| MFP1             | CHEMBL939     |          | 0.688889   | 1000.00  |       | *  |
| RDKit7           | CHEMBL939     |          | 0.805133   | 1000.00  |       | *  |
| Pattern          | CHEMBL1983268 |          | 0.824959   | 1995.26  |       |    |
| AP_bits          | CHEMBL215152  |          | 0.516266   | 3162.28  |       |    |
| TT_bits          | CHEMBL939     |          | 0.635135   | 1000.00  |       | *  |

|               |             |          |         |   |
|---------------|-------------|----------|---------|---|
| FP2           | CHEMBL939   | 0.782313 | 1000.00 | * |
| hybridization | CHEMBL939   | 0.816471 | 1000.00 | * |
| substructure  | CHEMBL95692 | 0.850000 | 794.33  |   |
| graph         | CHEMBL939   | 0.777778 | 1000.00 |   |
| pubchem       | CHEMBL939   | 0.925764 | 1000.00 | * |
| cdk_maccs     | CHEMBL24828 | 0.845070 | 158.49  | * |
| klekota_roth  | CHEMBL939   | 0.600000 | 1000.00 |   |

\*\*\* ki ACTIVITY \*\*\* value prediction  
 based on 8 locally validated fgps ---> 947.266  
 ["TT\_bits", "cdk\_maccs", "MFP1", "pubchem", "FP2", "FeatMFP1", "RDKit7",  
 "hybridization"]

7 rank

Homeodomain-interacting protein kinase 4 : Homo sapiens

score: 6.244 on CHEMBL1075167 based on 8 fingerprints

| Fingerprint type | Ligand        | Tanimoto Similarity | activity | Valid fg |
|------------------|---------------|---------------------|----------|----------|
| FeatMFP1         | CHEMBL939     | 0.750000            | 1258.93  | *        |
| MFP1             | CHEMBL939     | 0.688889            | 1258.93  | *        |
| RDKit7           | CHEMBL939     | 0.805133            | 1258.93  | *        |
| Pattern          | CHEMBL1968705 | 0.829787            | 5011.87  |          |
| AP_bits          | CHEMBL939     | 0.507317            | 1258.93  |          |
| TT_bits          | CHEMBL939     | 0.635135            | 1258.93  | *        |
| FP2              | CHEMBL939     | 0.782313            | 1258.93  | *        |
| hybridization    | CHEMBL939     | 0.816471            | 1258.93  | *        |
| substructure     | CHEMBL939     | 0.750000            | 1258.93  |          |
| graph            | CHEMBL939     | 0.777778            | 1258.93  |          |
| pubchem          | CHEMBL939     | 0.925764            | 1258.93  | *        |
| cdk_maccs        | CHEMBL939     | 0.840580            | 1258.93  | *        |
| klekota_roth     | CHEMBL939     | 0.600000            | 1258.93  |          |

\*\*\* ki ACTIVITY \*\*\* value prediction  
 based on 8 locally validated fgps ---> 1258.930  
 ["TT\_bits", "cdk\_maccs", "MFP1", "pubchem", "FP2", "FeatMFP1", "RDKit7",  
 "hybridization"]

8 rank

Receptor protein-tyrosine kinase erbB-2 : Homo sapiens

score: 6.244 on CHEMBL1824 based on 8 fingerprints

| Fingerprint type | Ligand    | Tanimoto Similarity | activity | Valid fg |
|------------------|-----------|---------------------|----------|----------|
| FeatMFP1         | CHEMBL939 | 0.750000            | 25.120   | *        |
| MFP1             | CHEMBL939 | 0.688889            | 25.120   | *        |
| RDKit7           | CHEMBL939 | 0.805133            | 25.120   | *        |
| Pattern          | CHEMBL554 | 0.855025            | 1.585    |          |
| AP_bits          | CHEMBL939 | 0.507317            | 25.120   |          |
| TT_bits          | CHEMBL939 | 0.635135            | 25.120   | *        |
| FP2              | CHEMBL939 | 0.782313            | 25.120   | *        |
| hybridization    | CHEMBL939 | 0.816471            | 25.120   | *        |
| substructure     | CHEMBL554 | 0.809524            | 1.585    |          |
| graph            | CHEMBL939 | 0.777778            | 25.120   |          |
| pubchem          | CHEMBL939 | 0.925764            | 25.120   | *        |
| cdk_maccs        | CHEMBL939 | 0.840580            | 25.120   | *        |
| klekota_roth     | CHEMBL939 | 0.600000            | 25.120   |          |

\*\*\* ki ACTIVITY \*\*\* value prediction  
 based on 8 locally validated fgps ---> 23.760  
 ["TT\_bits", "cdk\_maccs", "MFP1", "pubchem", "FP2", "FeatMFP1", "RDKit7",  
 "hybridization"]

9 rank

Epidermal growth factor receptor erbB1 : Homo sapiens

score: 6.244 on CHEMBL203 based on 8 fingerprints

| Fingerprint type | Ligand | Tanimoto Similarity | activity | Valid fg |
|------------------|--------|---------------------|----------|----------|
|------------------|--------|---------------------|----------|----------|

| Fingerprint type | Ligand        | Tanimoto Similarity | activity | Valid fg |
|------------------|---------------|---------------------|----------|----------|
| FeatMFP1         | CHEMBL939     | 0.750000            | 0.40     | *        |
| MFP1             | CHEMBL939     | 0.688889            | 0.40     | *        |
| RDKit7           | CHEMBL939     | 0.805133            | 0.40     | *        |
| Pattern          | CHEMBL1999749 | 0.825040            | 6.31     |          |
| AP_bits          | CHEMBL215152  | 0.516266            | 501.19   |          |
| TT_bits          | CHEMBL939     | 0.635135            | 0.40     | *        |
| FP2              | CHEMBL939     | 0.782313            | 0.40     | *        |
| hybridization    | CHEMBL939     | 0.816471            | 0.40     | *        |
| substructure     | CHEMBL1682560 | 0.761905            | 8.00     |          |
| graph            | CHEMBL939     | 0.777778            | 0.40     |          |
| pubchem          | CHEMBL939     | 0.925764            | 0.40     | *        |
| cdk_maccs        | CHEMBL939     | 0.840580            | 0.40     | *        |
| klekota_roth     | CHEMBL939     | 0.600000            | 0.40     |          |

\*\*\* ki ACTIVITY \*\*\* value prediction  
based on 8 locally validated fgps ---> 0.400  
["TT\_bits", "cdk\_maccs", "MFP1", "pubchem", "FP2", "FeatMFP1", "RDKit7", "hybridization"]

10 rank

Serine/threonine-protein kinase PIM1 : Homo sapiens

score: 6.244 on ChEMBL2147 based on 8 fingerprints

| Fingerprint type | Ligand        | Tanimoto Similarity | activity | Valid fg |
|------------------|---------------|---------------------|----------|----------|
| FeatMFP1         | CHEMBL939     | 0.750000            | 1995.26  | *        |
| MFP1             | CHEMBL939     | 0.688889            | 1995.26  | *        |
| RDKit7           | CHEMBL939     | 0.805133            | 1995.26  | *        |
| Pattern          | CHEMBL939     | 0.822785            | 1995.26  |          |
| AP_bits          | CHEMBL939     | 0.507317            | 1995.26  |          |
| TT_bits          | CHEMBL939     | 0.635135            | 1995.26  | *        |
| FP2              | CHEMBL939     | 0.782313            | 1995.26  | *        |
| hybridization    | CHEMBL939     | 0.816471            | 1995.26  | *        |
| substructure     | CHEMBL3634777 | 0.850000            | 3.40     |          |
| graph            | CHEMBL939     | 0.777778            | 1995.26  |          |
| pubchem          | CHEMBL939     | 0.925764            | 1995.26  | *        |
| cdk_maccs        | CHEMBL939     | 0.840580            | 1995.26  | *        |
| klekota_roth     | CHEMBL939     | 0.600000            | 1995.26  |          |

\*\*\* ki ACTIVITY \*\*\* value prediction  
based on 8 locally validated fgps ---> 1995.260  
["TT\_bits", "cdk\_maccs", "MFP1", "pubchem", "FP2", "FeatMFP1", "RDKit7", "hybridization"]

11 rank

Tyrosine-protein kinase BLK : Homo sapiens

score: 6.244 on ChEMBL2250 based on 8 fingerprints

| Fingerprint type | Ligand        | Tanimoto Similarity | activity | Valid fg |
|------------------|---------------|---------------------|----------|----------|
| FeatMFP1         | CHEMBL939     | 0.750000            | 1000.00  | *        |
| MFP1             | CHEMBL939     | 0.688889            | 1000.00  | *        |
| RDKit7           | CHEMBL939     | 0.805133            | 1000.00  | *        |
| Pattern          | CHEMBL1999749 | 0.825040            | 12.59    |          |
| AP_bits          | CHEMBL215152  | 0.516266            | 630.96   |          |
| TT_bits          | CHEMBL939     | 0.635135            | 1000.00  | *        |
| FP2              | CHEMBL939     | 0.782313            | 1000.00  | *        |
| hybridization    | CHEMBL939     | 0.816471            | 1000.00  | *        |
| substructure     | CHEMBL1825138 | 0.818182            | 630.96   |          |
| graph            | CHEMBL939     | 0.777778            | 1000.00  |          |
| pubchem          | CHEMBL939     | 0.925764            | 1000.00  | *        |
| cdk_maccs        | CHEMBL939     | 0.840580            | 1000.00  | *        |
| klekota_roth     | CHEMBL939     | 0.600000            | 1000.00  |          |

\*\*\* ki ACTIVITY \*\*\* value prediction  
based on 8 locally validated fgps ---> 1000.000

["TT\_bits", "cdk\_maccs", "MFP1", "pubchem", "FP2", "FeatMFP1", "RDKit7",  
"hybridization"]

12 rank

Phosphorylase kinase gamma subunit 2 : Homo sapiens

score: 6.244 on ChEMBL2349 based on 8 fingerprints

| Fingerprint type | Ligand        | Tanimoto Similarity | activity | Valid fg |
|------------------|---------------|---------------------|----------|----------|
| FeatMFP1         | ChEMBL939     | 0.750000            | 3162.28  | *        |
| MFP1             | ChEMBL939     | 0.688889            | 3162.28  | *        |
| RDKit7           | ChEMBL939     | 0.805133            | 3162.28  | *        |
| Pattern          | ChEMBL1968705 | 0.829787            | 630.96   |          |
| AP_bits          | ChEMBL939     | 0.507317            | 3162.28  |          |
| TT_bits          | ChEMBL939     | 0.635135            | 3162.28  | *        |
| FP2              | ChEMBL939     | 0.782313            | 3162.28  | *        |
| hybridization    | ChEMBL939     | 0.816471            | 3162.28  | *        |
| substructure     | ChEMBL1825138 | 0.818182            | 3162.28  |          |
| graph            | ChEMBL939     | 0.777778            | 3162.28  |          |
| pubchem          | ChEMBL939     | 0.925764            | 3162.28  | *        |
| cdk_maccs        | ChEMBL939     | 0.840580            | 3162.28  | *        |
| klekota_roth     | ChEMBL939     | 0.600000            | 3162.28  |          |

\*\*\* ki ACTIVITY \*\*\* value prediction

based on 8 locally validated fgps ---> 3162.280

["TT\_bits", "cdk\_maccs", "MFP1", "pubchem", "FP2", "FeatMFP1", "RDKit7",  
"hybridization"]

13 rank

Serine/threonine-protein kinase Chk2 : Homo sapiens

score: 6.244 on ChEMBL2527 based on 8 fingerprints

| Fingerprint type | Ligand        | Tanimoto Similarity | activity | Valid fg |
|------------------|---------------|---------------------|----------|----------|
| FeatMFP1         | ChEMBL939     | 0.750000            | 630.96   | *        |
| MFP1             | ChEMBL939     | 0.688889            | 630.96   | *        |
| RDKit7           | ChEMBL939     | 0.805133            | 630.96   | *        |
| Pattern          | ChEMBL1968705 | 0.829787            | 1000.00  |          |
| AP_bits          | ChEMBL215152  | 0.516266            | 1995.26  |          |
| TT_bits          | ChEMBL939     | 0.635135            | 630.96   | *        |
| FP2              | ChEMBL939     | 0.782313            | 630.96   | *        |
| hybridization    | ChEMBL939     | 0.816471            | 630.96   | *        |
| substructure     | ChEMBL491473  | 0.772727            | 2511.89  |          |
| graph            | ChEMBL939     | 0.777778            | 630.96   |          |
| pubchem          | ChEMBL939     | 0.925764            | 630.96   | *        |
| cdk_maccs        | ChEMBL939     | 0.840580            | 630.96   | *        |
| klekota_roth     | ChEMBL939     | 0.600000            | 630.96   |          |

\*\*\* ki ACTIVITY \*\*\* value prediction

based on 8 locally validated fgps ---> 630.960

["TT\_bits", "cdk\_maccs", "MFP1", "pubchem", "FP2", "FeatMFP1", "RDKit7",  
"hybridization"]

14 rank

Protein kinase C nu : Homo sapiens

score: 6.244 on ChEMBL2595 based on 8 fingerprints

| Fingerprint type | Ligand        | Tanimoto Similarity | activity | Valid fg |
|------------------|---------------|---------------------|----------|----------|
| FeatMFP1         | ChEMBL939     | 0.750000            | 1258.93  | *        |
| MFP1             | ChEMBL939     | 0.688889            | 1258.93  | *        |
| RDKit7           | ChEMBL939     | 0.805133            | 1258.93  | *        |
| Pattern          | ChEMBL1968705 | 0.829787            | 1584.89  |          |
| AP_bits          | ChEMBL939     | 0.507317            | 1258.93  |          |
| TT_bits          | ChEMBL939     | 0.635135            | 1258.93  | *        |
| FP2              | ChEMBL939     | 0.782313            | 1258.93  | *        |
| hybridization    | ChEMBL939     | 0.816471            | 1258.93  | *        |
| substructure     | ChEMBL95692   | 0.850000            | 3162.28  |          |

```

graph CHEMBL939 0.777778 1258.93
pubchem CHEMBL939 0.925764 1258.93 *
cdk_maccs CHEMBL939 0.840580 1258.93 *
klekota_roth CHEMBL939 0.600000 1258.93
*** ki ACTIVITY *** value prediction
based on 8 locally validated fgps ---> 1258.930
["TT_bits", "cdk_maccs", "MFP1", "pubchem", "FP2", "FeatMFP1", "RDKit7",
"hybridization"]

```

15 rank

c-Jun N-terminal kinase 3 : Homo sapiens

score: 6.244 on CHEMBL2637 based on 8 fingerprints

| Fingerprint type | Ligand    | Tanimoto Similarity | activity | Valid fg |
|------------------|-----------|---------------------|----------|----------|
| FeatMFP1         | CHEMBL939 | 0.750000            | 794.33   | *        |
| MFP1             | CHEMBL939 | 0.688889            | 794.33   | *        |
| RDKit7           | CHEMBL939 | 0.805133            | 794.33   | *        |
| Pattern          | CHEMBL939 | 0.822785            | 794.33   |          |
| AP_bits          | CHEMBL939 | 0.507317            | 794.33   |          |
| TT_bits          | CHEMBL939 | 0.635135            | 794.33   | *        |
| FP2              | CHEMBL939 | 0.782313            | 794.33   | *        |
| hybridization    | CHEMBL939 | 0.816471            | 794.33   | *        |
| substructure     | CHEMBL939 | 0.750000            | 794.33   |          |
| graph            | CHEMBL939 | 0.777778            | 794.33   |          |
| pubchem          | CHEMBL939 | 0.925764            | 794.33   | *        |
| cdk_maccs        | CHEMBL939 | 0.840580            | 794.33   | *        |
| klekota_roth     | CHEMBL939 | 0.600000            | 794.33   |          |

```

*** ki ACTIVITY *** value prediction
based on 8 locally validated fgps ---> 794.330
["TT_bits", "cdk_maccs", "MFP1", "pubchem", "FP2", "FeatMFP1", "RDKit7",
"hybridization"]

```

16 rank

CaM kinase II delta : Homo sapiens

score: 6.244 on CHEMBL2801 based on 8 fingerprints

| Fingerprint type | Ligand        | Tanimoto Similarity | activity | Valid fg |
|------------------|---------------|---------------------|----------|----------|
| FeatMFP1         | CHEMBL939     | 0.750000            | 2511.89  | *        |
| MFP1             | CHEMBL939     | 0.688889            | 2511.89  | *        |
| RDKit7           | CHEMBL939     | 0.805133            | 2511.89  | *        |
| Pattern          | CHEMBL1968705 | 0.829787            | 1000.00  |          |
| AP_bits          | CHEMBL939     | 0.507317            | 2511.89  |          |
| TT_bits          | CHEMBL939     | 0.635135            | 2511.89  | *        |
| FP2              | CHEMBL939     | 0.782313            | 2511.89  | *        |
| hybridization    | CHEMBL939     | 0.816471            | 2511.89  | *        |
| substructure     | CHEMBL1965702 | 0.800000            | 1995.26  |          |
| graph            | CHEMBL939     | 0.777778            | 2511.89  |          |
| pubchem          | CHEMBL939     | 0.925764            | 2511.89  | *        |
| cdk_maccs        | CHEMBL939     | 0.840580            | 2511.89  | *        |
| klekota_roth     | CHEMBL939     | 0.600000            | 2511.89  |          |

```

*** ki ACTIVITY *** value prediction
based on 8 locally validated fgps ---> 2511.890
["TT_bits", "cdk_maccs", "MFP1", "pubchem", "FP2", "FeatMFP1", "RDKit7",
"hybridization"]

```

17 rank

Casein kinase I delta : Homo sapiens

score: 6.244 on CHEMBL2828 based on 8 fingerprints

| Fingerprint type | Ligand    | Tanimoto Similarity | activity | Valid fg |
|------------------|-----------|---------------------|----------|----------|
| FeatMFP1         | CHEMBL939 | 0.750000            | 7943.28  | *        |
| MFP1             | CHEMBL939 | 0.688889            | 7943.28  | *        |
| RDKit7           | CHEMBL939 | 0.805133            | 7943.28  | *        |

|               |              |          |         |   |
|---------------|--------------|----------|---------|---|
| Pattern       | CHEMBL939    | 0.822785 | 7943.28 |   |
| AP_bits       | CHEMBL215152 | 0.516266 | 5011.87 |   |
| TT_bits       | CHEMBL939    | 0.635135 | 7943.28 | * |
| FP2           | CHEMBL939    | 0.782313 | 7943.28 | * |
| hybridization | CHEMBL939    | 0.816471 | 7943.28 | * |
| substructure  | CHEMBL95692  | 0.850000 | 19.95   |   |
| graph         | CHEMBL939    | 0.777778 | 7943.28 |   |
| pubchem       | CHEMBL939    | 0.925764 | 7943.28 | * |
| cdk_maccs     | CHEMBL939    | 0.840580 | 7943.28 | * |
| klekota_roth  | CHEMBL939    | 0.600000 | 7943.28 |   |

\*\*\* ki ACTIVITY \*\*\* value prediction  
 based on 8 locally validated fgps ---> 7943.280  
 ["TT\_bits", "cdk\_maccs", "MFP1", "pubchem", "FP2", "FeatMFP1", "RDKit7",  
 "hybridization"]

18 rank

Receptor protein-tyrosine kinase erbB-4 : Homo sapiens

score: 6.244 on ChEMBL3009 based on 8 fingerprints

| Fingerprint type | Ligand       | Tanimoto Similarity | activity | Valid fg |
|------------------|--------------|---------------------|----------|----------|
| FeatMFP1         | CHEMBL939    | 0.750000            | 158.49   | *        |
| MFP1             | CHEMBL939    | 0.688889            | 158.49   | *        |
| RDKit7           | CHEMBL939    | 0.805133            | 158.49   | *        |
| Pattern          | CHEMBL554    | 0.855025            | 25.12    |          |
| AP_bits          | CHEMBL215152 | 0.516266            | 199.53   |          |
| TT_bits          | CHEMBL939    | 0.635135            | 158.49   | *        |
| FP2              | CHEMBL939    | 0.782313            | 158.49   | *        |
| hybridization    | CHEMBL939    | 0.816471            | 158.49   | *        |
| substructure     | CHEMBL554    | 0.809524            | 25.12    |          |
| graph            | CHEMBL939    | 0.777778            | 158.49   |          |
| pubchem          | CHEMBL939    | 0.925764            | 158.49   | *        |
| cdk_maccs        | CHEMBL939    | 0.840580            | 158.49   | *        |
| klekota_roth     | CHEMBL939    | 0.600000            | 158.49   |          |

\*\*\* ki ACTIVITY \*\*\* value prediction  
 based on 8 locally validated fgps ---> 150.784  
 ["TT\_bits", "cdk\_maccs", "MFP1", "pubchem", "FP2", "FeatMFP1", "RDKit7",  
 "hybridization"]

19 rank

Tyrosine-protein kinase HCK : Homo sapiens

score: 6.244 on ChEMBL3234 based on 8 fingerprints

| Fingerprint type | Ligand    | Tanimoto Similarity | activity | Valid fg |
|------------------|-----------|---------------------|----------|----------|
| FeatMFP1         | CHEMBL939 | 0.750000            | 2511.89  | *        |
| MFP1             | CHEMBL939 | 0.688889            | 2511.89  | *        |
| RDKit7           | CHEMBL939 | 0.805133            | 2511.89  | *        |
| Pattern          | CHEMBL939 | 0.822785            | 2511.89  |          |
| AP_bits          | CHEMBL939 | 0.507317            | 2511.89  |          |
| TT_bits          | CHEMBL939 | 0.635135            | 2511.89  | *        |
| FP2              | CHEMBL939 | 0.782313            | 2511.89  | *        |
| hybridization    | CHEMBL939 | 0.816471            | 2511.89  | *        |
| substructure     | CHEMBL939 | 0.750000            | 2511.89  |          |
| graph            | CHEMBL939 | 0.777778            | 2511.89  |          |
| pubchem          | CHEMBL939 | 0.925764            | 2511.89  | *        |
| cdk_maccs        | CHEMBL939 | 0.840580            | 2511.89  | *        |
| klekota_roth     | CHEMBL939 | 0.600000            | 2511.89  |          |

\*\*\* ki ACTIVITY \*\*\* value prediction  
 based on 8 locally validated fgps ---> 2511.890  
 ["TT\_bits", "cdk\_maccs", "MFP1", "pubchem", "FP2", "FeatMFP1", "RDKit7",  
 "hybridization"]

20 rank

Interleukin-1 receptor-associated kinase 1 : Homo sapiens

score: 6.244 on ChEMBL3357 based on 8 fingerprints

| Fingerprint type | Ligand        | Tanimoto | Similarity | activity | Valid | fg |
|------------------|---------------|----------|------------|----------|-------|----|
| FeatMFP1         | CHEMBL939     |          | 0.750000   | 316.23   |       | *  |
| MFP1             | CHEMBL939     |          | 0.688889   | 316.23   |       | *  |
| RDKit7           | CHEMBL939     |          | 0.805133   | 316.23   |       | *  |
| Pattern          | CHEMBL939     |          | 0.822785   | 316.23   |       |    |
| AP_bits          | CHEMBL939     |          | 0.507317   | 316.23   |       |    |
| TT_bits          | CHEMBL939     |          | 0.635135   | 316.23   |       | *  |
| FP2              | CHEMBL939     |          | 0.782313   | 316.23   |       | *  |
| hybridization    | CHEMBL939     |          | 0.816471   | 316.23   |       | *  |
| substructure     | CHEMBL1825138 |          | 0.818182   | 199.53   |       |    |
| graph            | CHEMBL939     |          | 0.777778   | 316.23   |       |    |
| pubchem          | CHEMBL939     |          | 0.925764   | 316.23   |       | *  |
| cdk_maccs        | CHEMBL939     |          | 0.840580   | 316.23   |       | *  |
| klekota_roth     | CHEMBL939     |          | 0.600000   | 316.23   |       |    |

\*\*\* ki ACTIVITY \*\*\* value prediction

based on 8 locally validated fgps ---> 316.230

["TT\_bits", "cdk\_maccs", "MFP1", "pubchem", "FP2", "FeatMFP1", "RDKit7", "hybridization"]

21 rank

Interleukin-1 receptor-associated kinase 4 : Homo sapiens

score: 6.244 on ChEMBL3778 based on 8 fingerprints

| Fingerprint type | Ligand        | Tanimoto | Similarity | activity | Valid | fg |
|------------------|---------------|----------|------------|----------|-------|----|
| FeatMFP1         | CHEMBL939     |          | 0.750000   | 1000.00  |       | *  |
| MFP1             | CHEMBL939     |          | 0.688889   | 1000.00  |       | *  |
| RDKit7           | CHEMBL939     |          | 0.805133   | 1000.00  |       | *  |
| Pattern          | CHEMBL939     |          | 0.822785   | 1000.00  |       |    |
| AP_bits          | CHEMBL939     |          | 0.507317   | 1000.00  |       |    |
| TT_bits          | CHEMBL939     |          | 0.635135   | 1000.00  |       | *  |
| FP2              | CHEMBL939     |          | 0.782313   | 1000.00  |       | *  |
| hybridization    | CHEMBL939     |          | 0.816471   | 1000.00  |       | *  |
| substructure     | CHEMBL1996155 |          | 0.842105   | 3162.28  |       |    |
| graph            | CHEMBL939     |          | 0.777778   | 1000.00  |       |    |
| pubchem          | CHEMBL939     |          | 0.925764   | 1000.00  |       | *  |
| cdk_maccs        | CHEMBL939     |          | 0.840580   | 1000.00  |       | *  |
| klekota_roth     | CHEMBL939     |          | 0.600000   | 1000.00  |       |    |

\*\*\* ki ACTIVITY \*\*\* value prediction

based on 8 locally validated fgps ---> 1000.000

["TT\_bits", "cdk\_maccs", "MFP1", "pubchem", "FP2", "FeatMFP1", "RDKit7", "hybridization"]

22 rank

CaM kinase II gamma : Homo sapiens

score: 6.244 on ChEMBL3829 based on 8 fingerprints

| Fingerprint type | Ligand        | Tanimoto | Similarity | activity | Valid | fg |
|------------------|---------------|----------|------------|----------|-------|----|
| FeatMFP1         | CHEMBL939     |          | 0.750000   | 3162.28  |       | *  |
| MFP1             | CHEMBL939     |          | 0.688889   | 3162.28  |       | *  |
| RDKit7           | CHEMBL939     |          | 0.805133   | 3162.28  |       | *  |
| Pattern          | CHEMBL1968705 |          | 0.829787   | 3162.28  |       |    |
| AP_bits          | CHEMBL939     |          | 0.507317   | 3162.28  |       |    |
| TT_bits          | CHEMBL939     |          | 0.635135   | 3162.28  |       | *  |
| FP2              | CHEMBL939     |          | 0.782313   | 3162.28  |       | *  |
| hybridization    | CHEMBL939     |          | 0.816471   | 3162.28  |       | *  |
| substructure     | CHEMBL939     |          | 0.750000   | 3162.28  |       |    |
| graph            | CHEMBL939     |          | 0.777778   | 3162.28  |       |    |
| pubchem          | CHEMBL939     |          | 0.925764   | 3162.28  |       | *  |
| cdk_maccs        | CHEMBL939     |          | 0.840580   | 3162.28  |       | *  |
| klekota_roth     | CHEMBL939     |          | 0.600000   | 3162.28  |       |    |



\*\*\* ki ACTIVITY \*\*\* value prediction  
 based on 8 locally validated fgps ---> 3162.280  
 ["TT\_bits", "cdk\_maccs", "MFP1", "pubchem", "FP2", "FeatMFP1", "RDKit7",  
 "hybridization"]

23 rank

LIM domain kinase 1 : Homo sapiens

score: 6.244 on ChEMBL3836 based on 8 fingerprints

| Fingerprint type | Ligand        | Tanimoto | Similarity | activity | Valid | fg |
|------------------|---------------|----------|------------|----------|-------|----|
| FeatMFP1         | ChEMBL939     |          | 0.750000   | 3981.07  |       | *  |
| MFP1             | ChEMBL939     |          | 0.688889   | 3981.07  |       | *  |
| RDKit7           | ChEMBL939     |          | 0.805133   | 3981.07  |       | *  |
| Pattern          | ChEMBL939     |          | 0.822785   | 3981.07  |       |    |
| AP_bits          | ChEMBL939     |          | 0.507317   | 3981.07  |       |    |
| TT_bits          | ChEMBL939     |          | 0.635135   | 3981.07  |       | *  |
| FP2              | ChEMBL939     |          | 0.782313   | 3981.07  |       | *  |
| hybridization    | ChEMBL939     |          | 0.816471   | 3981.07  |       | *  |
| substructure     | ChEMBL1996155 |          | 0.842105   | 5011.87  |       |    |
| graph            | ChEMBL939     |          | 0.777778   | 3981.07  |       |    |
| pubchem          | ChEMBL939     |          | 0.925764   | 3981.07  |       | *  |
| cdk_maccs        | ChEMBL939     |          | 0.840580   | 3981.07  |       | *  |
| klekota_roth     | ChEMBL939     |          | 0.600000   | 3981.07  |       |    |

\*\*\* ki ACTIVITY \*\*\* value prediction  
 based on 8 locally validated fgps ---> 3981.070  
 ["TT\_bits", "cdk\_maccs", "MFP1", "pubchem", "FP2", "FeatMFP1", "RDKit7",  
 "hybridization"]

24 rank

Tyrosine-protein kinase Lyn : Homo sapiens

score: 6.244 on ChEMBL3905 based on 8 fingerprints

| Fingerprint type | Ligand        | Tanimoto | Similarity | activity | Valid | fg |
|------------------|---------------|----------|------------|----------|-------|----|
| FeatMFP1         | ChEMBL939     |          | 0.750000   | 158.49   |       | *  |
| MFP1             | ChEMBL939     |          | 0.688889   | 158.49   |       | *  |
| RDKit7           | ChEMBL939     |          | 0.805133   | 158.49   |       | *  |
| Pattern          | ChEMBL1999749 |          | 0.825040   | 63.10    |       |    |
| AP_bits          | ChEMBL215152  |          | 0.516266   | 1000.00  |       |    |
| TT_bits          | ChEMBL939     |          | 0.635135   | 158.49   |       | *  |
| FP2              | ChEMBL939     |          | 0.782313   | 158.49   |       | *  |
| hybridization    | ChEMBL939     |          | 0.816471   | 158.49   |       | *  |
| substructure     | ChEMBL230686  |          | 0.850000   | 25.90    |       |    |
| graph            | ChEMBL939     |          | 0.777778   | 158.49   |       |    |
| pubchem          | ChEMBL939     |          | 0.925764   | 158.49   |       | *  |
| cdk_maccs        | ChEMBL939     |          | 0.840580   | 158.49   |       | *  |
| klekota_roth     | ChEMBL939     |          | 0.600000   | 158.49   |       |    |

\*\*\* ki ACTIVITY \*\*\* value prediction  
 based on 8 locally validated fgps ---> 158.490  
 ["TT\_bits", "cdk\_maccs", "MFP1", "pubchem", "FP2", "FeatMFP1", "RDKit7",  
 "hybridization"]

25 rank

c-Jun N-terminal kinase 2 : Homo sapiens

score: 6.244 on ChEMBL4179 based on 8 fingerprints

| Fingerprint type | Ligand    | Tanimoto | Similarity | activity | Valid | fg |
|------------------|-----------|----------|------------|----------|-------|----|
| FeatMFP1         | ChEMBL939 |          | 0.750000   | 2511.89  |       | *  |
| MFP1             | ChEMBL939 |          | 0.688889   | 2511.89  |       | *  |
| RDKit7           | ChEMBL939 |          | 0.805133   | 2511.89  |       | *  |
| Pattern          | ChEMBL939 |          | 0.822785   | 2511.89  |       |    |
| AP_bits          | ChEMBL939 |          | 0.507317   | 2511.89  |       |    |
| TT_bits          | ChEMBL939 |          | 0.635135   | 2511.89  |       | *  |
| FP2              | ChEMBL939 |          | 0.782313   | 2511.89  |       | *  |

|               |              |          |         |   |
|---------------|--------------|----------|---------|---|
| hybridization | CHEMBL939    | 0.816471 | 2511.89 | * |
| substructure  | CHEMBL101311 | 0.761905 | 1584.89 |   |
| graph         | CHEMBL939    | 0.777778 | 2511.89 |   |
| pubchem       | CHEMBL939    | 0.925764 | 2511.89 | * |
| cdk_maccs     | CHEMBL939    | 0.840580 | 2511.89 | * |
| klekota_roth  | CHEMBL939    | 0.600000 | 2511.89 |   |

\*\*\* ki ACTIVITY \*\*\* value prediction  
 based on 8 locally validated fgps ---> 2511.890  
 ["TT\_bits", "cdk\_maccs", "MFP1", "pubchem", "FP2", "FeatMFP1", "RDKit7",  
 "hybridization"]

26 rank

Serine/threonine-protein kinase 2 : Homo sapiens

score: 6.244 on ChEMBL4202 based on 8 fingerprints

| Fingerprint type | Ligand        | Tanimoto | Similarity | activity | Valid fg |
|------------------|---------------|----------|------------|----------|----------|
| FeatMFP1         | CHEMBL939     | 0.750000 | 398.11     |          | *        |
| MFP1             | CHEMBL939     | 0.688889 | 398.11     |          | *        |
| RDKit7           | CHEMBL939     | 0.805133 | 398.11     |          | *        |
| Pattern          | CHEMBL1968705 | 0.829787 | 6309.57    |          |          |
| AP_bits          | CHEMBL939     | 0.507317 | 398.11     |          |          |
| TT_bits          | CHEMBL939     | 0.635135 | 398.11     |          | *        |
| FP2              | CHEMBL939     | 0.782313 | 398.11     |          | *        |
| hybridization    | CHEMBL939     | 0.816471 | 398.11     |          | *        |
| substructure     | CHEMBL1825138 | 0.818182 | 31.62      |          |          |
| graph            | CHEMBL939     | 0.777778 | 398.11     |          |          |
| pubchem          | CHEMBL939     | 0.925764 | 398.11     |          | *        |
| cdk_maccs        | CHEMBL939     | 0.840580 | 398.11     |          | *        |
| klekota_roth     | CHEMBL939     | 0.600000 | 398.11     |          |          |

\*\*\* ki ACTIVITY \*\*\* value prediction  
 based on 8 locally validated fgps ---> 398.110  
 ["TT\_bits", "cdk\_maccs", "MFP1", "pubchem", "FP2", "FeatMFP1", "RDKit7",  
 "hybridization"]

27 rank

MAP kinase signal-integrating kinase 2 : Homo sapiens

score: 6.244 on ChEMBL4204 based on 8 fingerprints

| Fingerprint type | Ligand        | Tanimoto | Similarity | activity | Valid fg |
|------------------|---------------|----------|------------|----------|----------|
| FeatMFP1         | CHEMBL939     | 0.750000 | 398.11     |          | *        |
| MFP1             | CHEMBL939     | 0.688889 | 398.11     |          | *        |
| RDKit7           | CHEMBL939     | 0.805133 | 398.11     |          | *        |
| Pattern          | CHEMBL1968705 | 0.829787 | 7943.28    |          |          |
| AP_bits          | CHEMBL939     | 0.507317 | 398.11     |          |          |
| TT_bits          | CHEMBL939     | 0.635135 | 398.11     |          | *        |
| FP2              | CHEMBL939     | 0.782313 | 398.11     |          | *        |
| hybridization    | CHEMBL939     | 0.816471 | 398.11     |          | *        |
| substructure     | CHEMBL939     | 0.750000 | 398.11     |          |          |
| graph            | CHEMBL939     | 0.777778 | 398.11     |          |          |
| pubchem          | CHEMBL939     | 0.925764 | 398.11     |          | *        |
| cdk_maccs        | CHEMBL939     | 0.840580 | 398.11     |          | *        |
| klekota_roth     | CHEMBL939     | 0.600000 | 398.11     |          |          |

\*\*\* ki ACTIVITY \*\*\* value prediction  
 based on 8 locally validated fgps ---> 398.110  
 ["TT\_bits", "cdk\_maccs", "MFP1", "pubchem", "FP2", "FeatMFP1", "RDKit7",  
 "hybridization"]

28 rank

Tyrosine-protein kinase FRK : Homo sapiens

score: 6.244 on ChEMBL4223 based on 8 fingerprints

| Fingerprint type | Ligand    | Tanimoto | Similarity | activity | Valid fg |
|------------------|-----------|----------|------------|----------|----------|
| FeatMFP1         | CHEMBL939 | 0.750000 | 251.19     |          | *        |

|               |               |          |         |   |
|---------------|---------------|----------|---------|---|
| MFP1          | CHEMBL939     | 0.688889 | 251.19  | * |
| RDKit7        | CHEMBL939     | 0.805133 | 251.19  | * |
| Pattern       | CHEMBL1973961 | 0.826014 | 1258.93 |   |
| AP_bits       | CHEMBL939     | 0.507317 | 251.19  |   |
| TT_bits       | CHEMBL939     | 0.635135 | 251.19  | * |
| FP2           | CHEMBL939     | 0.782313 | 251.19  | * |
| hybridization | CHEMBL939     | 0.816471 | 251.19  | * |
| substructure  | CHEMBL1825138 | 0.818182 | 199.53  |   |
| graph         | CHEMBL939     | 0.777778 | 251.19  |   |
| pubchem       | CHEMBL939     | 0.925764 | 251.19  | * |
| cdk_maccs     | CHEMBL939     | 0.840580 | 251.19  | * |
| klekota_roth  | CHEMBL939     | 0.600000 | 251.19  |   |

\*\*\* ki ACTIVITY \*\*\* value prediction

based on 8 locally validated fgps ---> 251.190

["TT\_bits", "cdk\_maccs", "MFP1", "pubchem", "FP2", "FeatMFP1", "RDKit7", "hybridization"]

29 rank

Serine/threonine-protein kinase D2 : Homo sapiens

score: 6.244 on ChEMBL4900 based on 8 fingerprints

| Fingerprint type | Ligand        | Tanimoto | Similarity | activity | Valid fg |
|------------------|---------------|----------|------------|----------|----------|
| FeatMFP1         | CHEMBL939     |          | 0.750000   | 2511.89  | *        |
| MFP1             | CHEMBL939     |          | 0.688889   | 2511.89  | *        |
| RDKit7           | CHEMBL939     |          | 0.805133   | 2511.89  | *        |
| Pattern          | CHEMBL1968705 |          | 0.829787   | 7943.28  |          |
| AP_bits          | CHEMBL939     |          | 0.507317   | 2511.89  |          |
| TT_bits          | CHEMBL939     |          | 0.635135   | 2511.89  | *        |
| FP2              | CHEMBL939     |          | 0.782313   | 2511.89  | *        |
| hybridization    | CHEMBL939     |          | 0.816471   | 2511.89  | *        |
| substructure     | CHEMBL1996155 |          | 0.842105   | 398.11   |          |
| graph            | CHEMBL939     |          | 0.777778   | 2511.89  |          |
| pubchem          | CHEMBL939     |          | 0.925764   | 2511.89  | *        |
| cdk_maccs        | CHEMBL939     |          | 0.840580   | 2511.89  | *        |
| klekota_roth     | CHEMBL939     |          | 0.600000   | 2511.89  |          |

\*\*\* ki ACTIVITY \*\*\* value prediction

based on 8 locally validated fgps ---> 2511.890

["TT\_bits", "cdk\_maccs", "MFP1", "pubchem", "FP2", "FeatMFP1", "RDKit7", "hybridization"]

30 rank

Serine/threonine-protein kinase PIM3 : Homo sapiens

score: 6.244 on ChEMBL5407 based on 8 fingerprints

| Fingerprint type | Ligand        | Tanimoto | Similarity | activity | Valid fg |
|------------------|---------------|----------|------------|----------|----------|
| FeatMFP1         | CHEMBL939     |          | 0.750000   | 1258.93  | *        |
| MFP1             | CHEMBL939     |          | 0.688889   | 1258.93  | *        |
| RDKit7           | CHEMBL939     |          | 0.805133   | 1258.93  | *        |
| Pattern          | CHEMBL1968705 |          | 0.829787   | 3981.07  |          |
| AP_bits          | CHEMBL939     |          | 0.507317   | 1258.93  |          |
| TT_bits          | CHEMBL939     |          | 0.635135   | 1258.93  | *        |
| FP2              | CHEMBL939     |          | 0.782313   | 1258.93  | *        |
| hybridization    | CHEMBL939     |          | 0.816471   | 1258.93  | *        |
| substructure     | CHEMBL3634777 |          | 0.850000   | 0.11     |          |
| graph            | CHEMBL939     |          | 0.777778   | 1258.93  |          |
| pubchem          | CHEMBL939     |          | 0.925764   | 1258.93  | *        |
| cdk_maccs        | CHEMBL939     |          | 0.840580   | 1258.93  | *        |
| klekota_roth     | CHEMBL939     |          | 0.600000   | 1258.93  |          |

\*\*\* ki ACTIVITY \*\*\* value prediction

based on 8 locally validated fgps ---> 1258.930

["TT\_bits", "cdk\_maccs", "MFP1", "pubchem", "FP2", "FeatMFP1", "RDKit7", "hybridization"]

31 rank

Misshapen-like kinase 1 : Homo sapiens

score: 6.244 on ChEMBL5518 based on 8 fingerprints

| Fingerprint type | Ligand      | Tanimoto | Similarity | activity | Valid fg |
|------------------|-------------|----------|------------|----------|----------|
| FeatMFP1         | CHEMBL939   |          | 0.750000   | 5011.87  | *        |
| MFP1             | CHEMBL939   |          | 0.688889   | 5011.87  | *        |
| RDKit7           | CHEMBL939   |          | 0.805133   | 5011.87  | *        |
| Pattern          | CHEMBL939   |          | 0.822785   | 5011.87  |          |
| AP_bits          | CHEMBL939   |          | 0.507317   | 5011.87  |          |
| TT_bits          | CHEMBL939   |          | 0.635135   | 5011.87  | *        |
| FP2              | CHEMBL939   |          | 0.782313   | 5011.87  | *        |
| hybridization    | CHEMBL939   |          | 0.816471   | 5011.87  | *        |
| substructure     | CHEMBL95692 |          | 0.850000   | 3981.07  |          |
| graph            | CHEMBL939   |          | 0.777778   | 5011.87  |          |
| pubchem          | CHEMBL939   |          | 0.925764   | 5011.87  | *        |
| cdk_maccs        | CHEMBL939   |          | 0.840580   | 5011.87  | *        |
| klekota_roth     | CHEMBL939   |          | 0.600000   | 5011.87  |          |

\*\*\* ki ACTIVITY \*\*\* value prediction

based on 8 locally validated fgps ---> 5011.870

["TT\_bits", "cdk\_maccs", "MFP1", "pubchem", "FP2", "FeatMFP1", "RDKit7", "hybridization"]

32 rank

BR serine/threonine-protein kinase 1 : Homo sapiens

score: 6.244 on ChEMBL5650 based on 8 fingerprints

| Fingerprint type | Ligand    | Tanimoto | Similarity | activity | Valid fg |
|------------------|-----------|----------|------------|----------|----------|
| FeatMFP1         | CHEMBL939 |          | 0.750000   | 3162.28  | *        |
| MFP1             | CHEMBL939 |          | 0.688889   | 3162.28  | *        |
| RDKit7           | CHEMBL939 |          | 0.805133   | 3162.28  | *        |
| Pattern          | CHEMBL939 |          | 0.822785   | 3162.28  |          |
| AP_bits          | CHEMBL939 |          | 0.507317   | 3162.28  |          |
| TT_bits          | CHEMBL939 |          | 0.635135   | 3162.28  | *        |
| FP2              | CHEMBL939 |          | 0.782313   | 3162.28  | *        |
| hybridization    | CHEMBL939 |          | 0.816471   | 3162.28  | *        |
| substructure     | CHEMBL939 |          | 0.750000   | 3162.28  |          |
| graph            | CHEMBL939 |          | 0.777778   | 3162.28  |          |
| pubchem          | CHEMBL939 |          | 0.925764   | 3162.28  | *        |
| cdk_maccs        | CHEMBL939 |          | 0.840580   | 3162.28  | *        |
| klekota_roth     | CHEMBL939 |          | 0.600000   | 3162.28  |          |

\*\*\* ki ACTIVITY \*\*\* value prediction

based on 8 locally validated fgps ---> 3162.280

["TT\_bits", "cdk\_maccs", "MFP1", "pubchem", "FP2", "FeatMFP1", "RDKit7", "hybridization"]

33 rank

Serine/threonine-protein kinase SIK2 : Homo sapiens

score: 6.244 on ChEMBL5699 based on 8 fingerprints

| Fingerprint type | Ligand    | Tanimoto | Similarity | activity | Valid fg |
|------------------|-----------|----------|------------|----------|----------|
| FeatMFP1         | CHEMBL939 |          | 0.750000   | 316.23   | *        |
| MFP1             | CHEMBL939 |          | 0.688889   | 316.23   | *        |
| RDKit7           | CHEMBL939 |          | 0.805133   | 316.23   | *        |
| Pattern          | CHEMBL939 |          | 0.822785   | 316.23   |          |
| AP_bits          | CHEMBL939 |          | 0.507317   | 316.23   |          |
| TT_bits          | CHEMBL939 |          | 0.635135   | 316.23   | *        |
| FP2              | CHEMBL939 |          | 0.782313   | 316.23   | *        |
| hybridization    | CHEMBL939 |          | 0.816471   | 316.23   | *        |
| substructure     | CHEMBL939 |          | 0.750000   | 316.23   |          |
| graph            | CHEMBL939 |          | 0.777778   | 316.23   |          |
| pubchem          | CHEMBL939 |          | 0.925764   | 316.23   | *        |

```

    cdk_maccs CHEMBL939          0.840580    316.23      *
    klekota_roth CHEMBL939        0.600000    316.23
    *** ki ACTIVITY *** value prediction
    based on 8 locally validated fgps ---> 316.230
["TT_bits", "cdk_maccs", "MFP1", "pubchem", "FP2", "FeatMFP1", "RDKit7",
"hybridization"]

```

34 rank

Serine/threonine-protein kinase Aurora-B : Homo sapiens

score: 3.640 on ChEMBL2185 based on 5 fingerprints

| Fingerprint type | Ligand        | Tanimoto | Similarity | activity | Valid fg |
|------------------|---------------|----------|------------|----------|----------|
| FeatMFP1         | CHEMBL24828   |          | 0.676471   | 2511.89  |          |
| MFP1             | CHEMBL202721  |          | 0.540000   | 79.43    |          |
| RDKit7           | CHEMBL202721  |          | 0.717813   | 79.43    |          |
| Pattern          | CHEMBL386310  |          | 0.875415   | 1.00     | *        |
| AP_bits          | CHEMBL386310  |          | 0.608054   | 1.00     | *        |
| TT_bits          | CHEMBL217804  |          | 0.609756   | 2.00     | *        |
| FP2              | CHEMBL202721  |          | 0.619048   | 79.43    |          |
| hybridization    | CHEMBL554     |          | 0.701826   | 1995.26  | *        |
| substructure     | CHEMBL1825138 |          | 0.818182   | 39.81    |          |
| graph            | CHEMBL24828   |          | 0.668293   | 2511.89  |          |
| pubchem          | CHEMBL24828   |          | 0.848739   | 2511.89  |          |
| cdk_maccs        | CHEMBL24828   |          | 0.845070   | 2511.89  | *        |
| klekota_roth     | CHEMBL491473  |          | 0.585366   | 1258.93  |          |

\*\*\* ki ACTIVITY \*\*\* value prediction

based on 5 locally validated fgps ---> 902.132

["Pattern", "hybridization", "TT\_bits", "cdk\_maccs", "AP\_bits"]

35 rank

Platelet-derived growth factor receptor alpha : Homo sapiens

score: 3.105 on ChEMBL2007 based on 4 fingerprints

| Fingerprint type | Ligand       | Tanimoto | Similarity | activity | Valid fg |
|------------------|--------------|----------|------------|----------|----------|
| FeatMFP1         | CHEMBL24828  |          | 0.676471   | 158.49   |          |
| MFP1             | CHEMBL202721 |          | 0.540000   | 398.11   |          |
| RDKit7           | CHEMBL202721 |          | 0.717813   | 398.11   |          |
| Pattern          | CHEMBL124660 |          | 0.861301   | 63.10    | *        |
| AP_bits          | CHEMBL202721 |          | 0.547865   | 398.11   | *        |
| TT_bits          | CHEMBL202721 |          | 0.529412   | 398.11   |          |
| FP2              | CHEMBL202721 |          | 0.619048   | 398.11   |          |
| hybridization    | CHEMBL202721 |          | 0.685714   | 398.11   |          |
| substructure     | CHEMBL24828  |          | 0.809524   | 158.49   |          |
| graph            | CHEMBL24828  |          | 0.668293   | 158.49   |          |
| pubchem          | CHEMBL124660 |          | 0.851064   | 63.10    | *        |
| cdk_maccs        | CHEMBL24828  |          | 0.845070   | 158.49   | *        |
| klekota_roth     | CHEMBL491473 |          | 0.585366   | 10.00    |          |

\*\*\* ki ACTIVITY \*\*\* value prediction

based on 4 locally validated fgps ---> 170.700

["Pattern", "cdk\_maccs", "pubchem", "AP\_bits"]

## MuSSEL Prediction IC<sub>50</sub>:

1 rank

Epidermal growth factor receptor erbB1 : Homo sapiens

score: 10.901 on ChEMBL203 based on 13 fingerprints

| Fingerprint type | Ligand        | Tanimoto | Similarity | activity | Valid fg |
|------------------|---------------|----------|------------|----------|----------|
| FeatMFP1         | CHEMBL56936   |          | 0.812500   | 2.00     | *        |
| MFP1             | CHEMBL939     |          | 0.688889   | 0.10     | *        |
| RDKit7           | CHEMBL598799  |          | 0.915222   | 9.08     | *        |
| Pattern          | CHEMBL598799  |          | 0.926786   | 9.08     | *        |
| AP_bits          | CHEMBL598799  |          | 0.675595   | 9.08     | *        |
| TT_bits          | CHEMBL598799  |          | 0.760000   | 9.08     | *        |
| FP2              | CHEMBL2334003 |          | 0.855072   | 13.60    | *        |
| hybridization    | CHEMBL598799  |          | 0.841871   | 9.08     | *        |
| substructure     | CHEMBL247709  |          | 0.950000   | 48.00    | *        |
| graph            | CHEMBL3355883 |          | 0.911917   | 38.30    | *        |
| pubchem          | CHEMBL2334003 |          | 0.950893   | 13.60    | *        |
| cdk_maccs        | CHEMBL291514  |          | 0.911765   | 79.00    | *        |
| klekota_roth     | CHEMBL247709  |          | 0.700000   | 48.00    | *        |

\*\*\* ic50 ACTIVITY \*\*\* value prediction

based on 13 locally validated fgps ---> 58.254

["TT\_bits", "substructure", "cdk\_maccs", "Pattern", "FP2", "MFP1", "klekota\_roth", "pubchem", "graph", "AP\_bits", "FeatMFP1", "RDKit7", "hybridization"]

2 rank

Receptor protein-tyrosine kinase erbB-2 : Homo sapiens

score: 10.719 on ChEMBL1824 based on 13 fingerprints

| Fingerprint type | Ligand        | Tanimoto | Similarity | activity | Valid fg |
|------------------|---------------|----------|------------|----------|----------|
| FeatMFP1         | CHEMBL3814812 |          | 0.777778   | 12.1     | *        |
| MFP1             | CHEMBL939     |          | 0.688889   | 240.0    | *        |
| RDKit7           | CHEMBL598799  |          | 0.915222   | 10.1     | *        |
| Pattern          | CHEMBL598799  |          | 0.926786   | 10.1     | *        |
| AP_bits          | CHEMBL598799  |          | 0.675595   | 10.1     | *        |
| TT_bits          | CHEMBL598799  |          | 0.760000   | 10.1     | *        |
| FP2              | CHEMBL197640  |          | 0.836735   | 2.0      | *        |
| hybridization    | CHEMBL598799  |          | 0.841871   | 10.1     | *        |
| substructure     | CHEMBL247709  |          | 0.950000   | 41.0     | *        |
| graph            | CHEMBL2408050 |          | 0.835897   | 264.0    | *        |
| pubchem          | CHEMBL939     |          | 0.925764   | 240.0    | *        |
| cdk_maccs        | CHEMBL197640  |          | 0.884058   | 2.0      | *        |
| klekota_roth     | CHEMBL247709  |          | 0.700000   | 41.0     | *        |

\*\*\* ic50 ACTIVITY \*\*\* value prediction

based on 13 locally validated fgps ---> 125.194

["TT\_bits", "substructure", "cdk\_maccs", "Pattern", "FP2", "MFP1", "klekota\_roth", "pubchem", "graph", "AP\_bits", "FeatMFP1", "RDKit7", "hybridization"]

3 rank

Vascular endothelial growth factor receptor 2 : Homo sapiens

score: 10.262 on ChEMBL279 based on 13 fingerprints

| Fingerprint type | Ligand        | Tanimoto | Similarity | activity | Valid fg |
|------------------|---------------|----------|------------|----------|----------|
| FeatMFP1         | CHEMBL1202477 |          | 0.787879   | 9.0      | *        |
| MFP1             | CHEMBL939     |          | 0.688889   | 1900.0   | *        |
| RDKit7           | CHEMBL939     |          | 0.805133   | 1900.0   | *        |
| Pattern          | CHEMBL3758749 |          | 0.898067   | 1810.0   | *        |
| AP_bits          | CHEMBL3133754 |          | 0.603198   | 8568.0   | *        |
| TT_bits          | CHEMBL169797  |          | 0.643836   | 1110.0   | *        |
| FP2              | CHEMBL1744347 |          | 0.787671   | 20.0     | *        |
| hybridization    | CHEMBL939     |          | 0.816471   | 1900.0   | *        |
| substructure     | CHEMBL147180  |          | 0.947368   | 40.0     | *        |
| graph            | CHEMBL3706823 |          | 0.782609   | 1.0      | *        |

```

        pubchem  CHEMBL1744347          0.934211      20.0      *
        cdk_maccs CHEMBL1744347          0.900000      20.0      *
        klekota_roth CHEMBL2448067        0.666667      30.0      *
        *** ic50 ACTIVITY *** value prediction
        based on 13 locally validated fgps ---> 1332.325
["TT_bits", "substructure", "cdk_maccs", "Pattern", "FP2", "MFP1",
"klekota_roth", "pubchem", "graph", "AP_bits", "FeatMFP1", "RDKit7",
"hybridization"]

```

4 rank

Tyrosine-protein kinase SRC : Homo sapiens

score: 10.050 on CHEMBL267 based on 13 fingerprints

| Fingerprint type | Ligand       | Tanimoto Similarity | activity | Valid fg |
|------------------|--------------|---------------------|----------|----------|
| FeatMFP1         | CHEMBL128158 | 0.764706            | 1.1      | *        |
| MFP1             | CHEMBL939    | 0.688889            | 1100.0   | *        |
| RDKit7           | CHEMBL939    | 0.805133            | 1100.0   | *        |
| Pattern          | CHEMBL426148 | 0.879581            | 600.0    | *        |
| AP_bits          | CHEMBL201307 | 0.572005            | 3000.0   | *        |
| TT_bits          | CHEMBL169797 | 0.643836            | 37.0     | *        |
| FP2              | CHEMBL939    | 0.782313            | 1100.0   | *        |
| hybridization    | CHEMBL939    | 0.816471            | 1100.0   | *        |
| substructure     | CHEMBL217977 | 0.894737            | 540.0    | *        |
| graph            | CHEMBL939    | 0.777778            | 1100.0   | *        |
| pubchem          | CHEMBL939    | 0.925764            | 1100.0   | *        |
| cdk_maccs        | CHEMBL128158 | 0.898551            | 1.1      | *        |
| klekota_roth     | CHEMBL939    | 0.600000            | 1100.0   | *        |

```

        *** ic50 ACTIVITY *** value prediction
        based on 13 locally validated fgps ---> 701.377
["TT_bits", "substructure", "cdk_maccs", "Pattern", "FP2", "MFP1",
"klekota_roth", "pubchem", "graph", "AP_bits", "FeatMFP1", "RDKit7",
"hybridization"]

```

5 rank

Tyrosine-protein kinase receptor RET : Homo sapiens

score: 10.028 on CHEMBL2041 based on 13 fingerprints

| Fingerprint type | Ligand        | Tanimoto Similarity | activity | Valid fg |
|------------------|---------------|---------------------|----------|----------|
| FeatMFP1         | CHEMBL3797261 | 0.800000            | 5.0      | *        |
| MFP1             | CHEMBL939     | 0.688889            | 1700.0   | *        |
| RDKit7           | CHEMBL939     | 0.805133            | 1700.0   | *        |
| Pattern          | CHEMBL3800348 | 0.855615            | 29.0     | *        |
| AP_bits          | CHEMBL939     | 0.507317            | 1700.0   | *        |
| TT_bits          | CHEMBL939     | 0.635135            | 1700.0   | *        |
| FP2              | CHEMBL939     | 0.782313            | 1700.0   | *        |
| hybridization    | CHEMBL939     | 0.816471            | 1700.0   | *        |
| substructure     | CHEMBL3797261 | 0.857143            | 5.0      | *        |
| graph            | CHEMBL939     | 0.777778            | 1700.0   | *        |
| pubchem          | CHEMBL939     | 0.925764            | 1700.0   | *        |
| cdk_maccs        | CHEMBL3797261 | 0.914286            | 5.0      | *        |
| klekota_roth     | CHEMBL3799971 | 0.662338            | 11.0     | *        |

```

        *** ic50 ACTIVITY *** value prediction
        based on 13 locally validated fgps ---> 740.419
["TT_bits", "substructure", "cdk_maccs", "Pattern", "FP2", "MFP1",
"klekota_roth", "pubchem", "graph", "AP_bits", "FeatMFP1", "RDKit7",
"hybridization"]

```

6 rank

Receptor protein-tyrosine kinase erbB-4 : Homo sapiens

score: 9.883 on CHEMBL3009 based on 13 fingerprints

| Fingerprint type | Ligand    | Tanimoto Similarity | activity | Valid fg |
|------------------|-----------|---------------------|----------|----------|
| FeatMFP1         | CHEMBL939 | 0.750000            | 476.0    | *        |

|               |               |          |        |   |
|---------------|---------------|----------|--------|---|
| MFP1          | CHEMBL939     | 0.688889 | 476.0  | * |
| RDKit7        | CHEMBL939     | 0.805133 | 476.0  | * |
| Pattern       | CHEMBL3680375 | 0.891753 | 61.5   | * |
| AP_bits       | CHEMBL1645462 | 0.519411 | 190.0  | * |
| TT_bits       | CHEMBL939     | 0.635135 | 476.0  | * |
| FP2           | CHEMBL939     | 0.782313 | 476.0  | * |
| hybridization | CHEMBL939     | 0.816471 | 476.0  | * |
| substructure  | CHEMBL3828092 | 0.850000 | 1603.0 | * |
| graph         | CHEMBL939     | 0.777778 | 476.0  | * |
| pubchem       | CHEMBL939     | 0.925764 | 476.0  | * |
| cdk_maccs     | CHEMBL939     | 0.840580 | 476.0  | * |
| klekota_roth  | CHEMBL939     | 0.600000 | 476.0  | * |

\*\*\* ic50 ACTIVITY \*\*\* value prediction

based on 12 locally validated fgps ---> 352.929

["TT\_bits", "cdk\_maccs", "Pattern", "FP2", "MFP1", "klekota\_roth",  
"pubchem", "graph", "AP\_bits", "FeatMFP1", "RDKit7", "hybridization"]

7 rank

Vascular endothelial growth factor receptor 1 : Homo sapiens

score: 9.188 on ChEMBL1868 based on 12 fingerprints

| Fingerprint type | Ligand        | Tanimoto | Similarity | activity | Valid fg |
|------------------|---------------|----------|------------|----------|----------|
| FeatMFP1         | CHEMBL1202477 | 0.787879 | 550.0      | *        |          |
| MFP1             | CHEMBL24137   | 0.617021 | 200.0      | *        |          |
| RDKit7           | CHEMBL1744347 | 0.792329 | 600.0      | *        |          |
| Pattern          | CHEMBL2448066 | 0.872302 | 20.0       | *        |          |
| AP_bits          | CHEMBL453737  | 0.538462 | 45.0       | *        |          |
| TT_bits          | CHEMBL2448067 | 0.586667 | 200.0      | *        |          |
| FP2              | CHEMBL1744347 | 0.787671 | 600.0      | *        |          |
| hybridization    | CHEMBL1744347 | 0.757506 | 600.0      | *        |          |
| substructure     | CHEMBL147180  | 0.947368 | 300.0      | *        |          |
| graph            | CHEMBL1744347 | 0.766497 | 600.0      | *        |          |
| pubchem          | CHEMBL1744347 | 0.934211 | 600.0      | *        |          |
| cdk_maccs        | CHEMBL1744347 | 0.900000 | 600.0      | *        |          |
| klekota_roth     | CHEMBL2448067 | 0.666667 | 200.0      | *        |          |

\*\*\* ic50 ACTIVITY \*\*\* value prediction

based on 12 locally validated fgps ---> 426.218

["TT\_bits", "substructure", "cdk\_maccs", "Pattern", "FP2", "MFP1",  
"klekota\_roth", "pubchem", "AP\_bits", "FeatMFP1", "RDKit7",  
"hybridization"]

8 rank

Fibroblast growth factor receptor 1 : Homo sapiens

score: 9.165 on ChEMBL3650 based on 12 fingerprints

| Fingerprint type | Ligand        | Tanimoto | Similarity | activity | Valid fg |
|------------------|---------------|----------|------------|----------|----------|
| FeatMFP1         | CHEMBL1202477 | 0.787879 | 2000.0     | *        |          |
| MFP1             | CHEMBL24137   | 0.617021 | 6700.0     | *        |          |
| RDKit7           | CHEMBL1744347 | 0.792329 | 2100.0     | *        |          |
| Pattern          | CHEMBL2448066 | 0.872302 | 900.0      | *        |          |
| AP_bits          | CHEMBL3691340 | 0.515843 | 11.5       | *        |          |
| TT_bits          | CHEMBL2419762 | 0.586667 | 63.0       | *        |          |
| FP2              | CHEMBL1744347 | 0.787671 | 2100.0     | *        |          |
| hybridization    | CHEMBL1744347 | 0.757506 | 2100.0     | *        |          |
| substructure     | CHEMBL147180  | 0.947368 | 9400.0     | *        |          |
| graph            | CHEMBL1744347 | 0.766497 | 2100.0     | *        |          |
| pubchem          | CHEMBL1744347 | 0.934211 | 2100.0     | *        |          |
| cdk_maccs        | CHEMBL1744347 | 0.900000 | 2100.0     | *        |          |
| klekota_roth     | CHEMBL2448067 | 0.666667 | 4200.0     | *        |          |

\*\*\* ic50 ACTIVITY \*\*\* value prediction

based on 12 locally validated fgps ---> 4262.451



["TT\_bits", "substructure", "cdk\_maccs", "Pattern", "FP2", "MFP1",  
 "klekota\_roth", "pubchem", "AP\_bits", "FeatMFP1", "RDKit7",  
 "hybridization"]

9 rank

Serine/threonine-protein kinase B-raf : Homo sapiens

score: 9.154 on ChEMBL5145 based on 12 fingerprints

| Fingerprint type | Ligand        | Tanimoto | Similarity | activity | Valid fg |
|------------------|---------------|----------|------------|----------|----------|
| FeatMFP1         | CHEMBL939     |          | 0.750000   | 30000.0  | *        |
| MFP1             | CHEMBL939     |          | 0.688889   | 30000.0  | *        |
| RDKit7           | CHEMBL939     |          | 0.805133   | 30000.0  | *        |
| Pattern          | CHEMBL3133753 |          | 0.912892   | 31.0     | *        |
| AP_bits          | CHEMBL3133753 |          | 0.618911   | 31.0     | *        |
| TT_bits          | CHEMBL939     |          | 0.635135   | 30000.0  | *        |
| FP2              | CHEMBL939     |          | 0.782313   | 30000.0  | *        |
| hybridization    | CHEMBL939     |          | 0.816471   | 30000.0  | *        |
| substructure     | CHEMBL1079785 |          | 0.809524   | 8.7      |          |
| graph            | CHEMBL939     |          | 0.777778   | 30000.0  | *        |
| pubchem          | CHEMBL939     |          | 0.925764   | 30000.0  | *        |
| cdk_maccs        | CHEMBL939     |          | 0.840580   | 30000.0  | *        |
| klekota_roth     | CHEMBL939     |          | 0.600000   | 30000.0  | *        |

\*\*\* ic50 ACTIVITY \*\*\* value prediction

based on 12 locally validated fgps ---> 16597.534

["TT\_bits", "cdk\_maccs", "Pattern", "FP2", "MFP1", "klekota\_roth",  
 "pubchem", "graph", "AP\_bits", "FeatMFP1", "RDKit7", "hybridization"]

10 rank

Ephrin type-B receptor 4 : Homo sapiens

score: 9.036 on ChEMBL5147 based on 12 fingerprints

| Fingerprint type | Ligand        | Tanimoto | Similarity | activity | Valid fg |
|------------------|---------------|----------|------------|----------|----------|
| FeatMFP1         | CHEMBL939     |          | 0.750000   | 1000.0   | *        |
| MFP1             | CHEMBL939     |          | 0.688889   | 1000.0   | *        |
| RDKit7           | CHEMBL939     |          | 0.805133   | 1000.0   | *        |
| Pattern          | CHEMBL288441  |          | 0.823430   | 5.5      |          |
| AP_bits          | CHEMBL939     |          | 0.507317   | 1000.0   | *        |
| TT_bits          | CHEMBL939     |          | 0.635135   | 1000.0   | *        |
| FP2              | CHEMBL939     |          | 0.782313   | 1000.0   | *        |
| hybridization    | CHEMBL939     |          | 0.816471   | 1000.0   | *        |
| substructure     | CHEMBL3544983 |          | 0.900000   | 50.0     | *        |
| graph            | CHEMBL939     |          | 0.777778   | 1000.0   | *        |
| pubchem          | CHEMBL939     |          | 0.925764   | 1000.0   | *        |
| cdk_maccs        | CHEMBL288441  |          | 0.847222   | 5.5      | *        |
| klekota_roth     | CHEMBL939     |          | 0.600000   | 1000.0   | *        |

\*\*\* ic50 ACTIVITY \*\*\* value prediction

based on 12 locally validated fgps ---> 704.900

["TT\_bits", "substructure", "cdk\_maccs", "AP\_bits", "MFP1",  
 "klekota\_roth", "pubchem", "graph", "FP2", "FeatMFP1", "RDKit7",  
 "hybridization"]

11 rank

Tyrosine-protein kinase ABL : Homo sapiens

score: 9.022 on ChEMBL1862 based on 12 fingerprints

| Fingerprint type | Ligand        | Tanimoto | Similarity | activity | Valid fg |
|------------------|---------------|----------|------------|----------|----------|
| FeatMFP1         | CHEMBL939     |          | 0.750000   | 1200.0   | *        |
| MFP1             | CHEMBL939     |          | 0.688889   | 1200.0   | *        |
| RDKit7           | CHEMBL939     |          | 0.805133   | 1200.0   | *        |
| Pattern          | CHEMBL1630109 |          | 0.886010   | 5300.0   | *        |
| AP_bits          | CHEMBL939     |          | 0.507317   | 1200.0   | *        |
| TT_bits          | CHEMBL939     |          | 0.635135   | 1200.0   | *        |
| FP2              | CHEMBL939     |          | 0.782313   | 1200.0   | *        |

|               |              |          |        |   |
|---------------|--------------|----------|--------|---|
| hybridization | CHEMBL939    | 0.816471 | 1200.0 | * |
| substructure  | CHEMBL601719 | 0.818182 | 24.0   |   |
| graph         | CHEMBL939    | 0.777778 | 1200.0 | * |
| pubchem       | CHEMBL939    | 0.925764 | 1200.0 | * |
| cdk_maccs     | CHEMBL288441 | 0.847222 | 0.5    | * |
| klekota_roth  | CHEMBL939    | 0.600000 | 1200.0 | * |

\*\*\* ic50 ACTIVITY \*\*\* value prediction  
based on 12 locally validated fgps ---> 1769.360  
["TT\_bits", "cdk\_maccs", "Pattern", "FP2", "MFP1", "klekota\_roth",  
"pubchem", "graph", "AP\_bits", "FeatMFP1", "RDKit7", "hybridization"]

12 rank

Tyrosine kinase non-receptor protein 2 : Homo sapiens

score: 8.986 on ChEMBL4599 based on 12 fingerprints

| Fingerprint type | Ligand        | Tanimoto | Similarity | activity | Valid fg |
|------------------|---------------|----------|------------|----------|----------|
| FeatMFP1         | CHEMBL939     |          | 0.750000   | 2300.0   | *        |
| MFP1             | CHEMBL939     |          | 0.688889   | 2300.0   | *        |
| RDKit7           | CHEMBL939     |          | 0.805133   | 2300.0   | *        |
| Pattern          | CHEMBL1983268 |          | 0.824959   | 70.0     |          |
| AP_bits          | CHEMBL939     |          | 0.507317   | 2300.0   | *        |
| TT_bits          | CHEMBL939     |          | 0.635135   | 2300.0   | *        |
| FP2              | CHEMBL939     |          | 0.782313   | 2300.0   | *        |
| hybridization    | CHEMBL939     |          | 0.816471   | 2300.0   | *        |
| substructure     | CHEMBL247468  |          | 0.850000   | 98.0     | *        |
| graph            | CHEMBL939     |          | 0.777778   | 2300.0   | *        |
| pubchem          | CHEMBL939     |          | 0.925764   | 2300.0   | *        |
| cdk_maccs        | CHEMBL288441  |          | 0.847222   | 2.7      | *        |
| klekota_roth     | CHEMBL939     |          | 0.600000   | 2300.0   | *        |

\*\*\* ic50 ACTIVITY \*\*\* value prediction  
based on 11 locally validated fgps ---> 1919.949  
["TT\_bits", "cdk\_maccs", "AP\_bits", "MFP1", "klekota\_roth", "pubchem",  
"graph", "FP2", "FeatMFP1", "RDKit7", "hybridization"]

13 rank

ATP-binding cassette sub-family G member 2 : Homo sapiens

score: 8.986 on ChEMBL5393 based on 12 fingerprints

| Fingerprint type | Ligand        | Tanimoto | Similarity | activity | Valid fg |
|------------------|---------------|----------|------------|----------|----------|
| FeatMFP1         | CHEMBL939     |          | 0.750000   | 400.0    | *        |
| MFP1             | CHEMBL939     |          | 0.688889   | 400.0    | *        |
| RDKit7           | CHEMBL939     |          | 0.805133   | 400.0    | *        |
| Pattern          | CHEMBL3809832 |          | 0.856373   | 1710.0   | *        |
| AP_bits          | CHEMBL939     |          | 0.507317   | 400.0    | *        |
| TT_bits          | CHEMBL939     |          | 0.635135   | 400.0    | *        |
| FP2              | CHEMBL939     |          | 0.782313   | 400.0    | *        |
| hybridization    | CHEMBL939     |          | 0.816471   | 400.0    | *        |
| substructure     | CHEMBL939     |          | 0.750000   | 400.0    |          |
| graph            | CHEMBL939     |          | 0.777778   | 400.0    | *        |
| pubchem          | CHEMBL939     |          | 0.925764   | 400.0    | *        |
| cdk_maccs        | CHEMBL939     |          | 0.840580   | 400.0    | *        |
| klekota_roth     | CHEMBL939     |          | 0.600000   | 400.0    | *        |

\*\*\* ic50 ACTIVITY \*\*\* value prediction  
based on 12 locally validated fgps ---> 4402.171  
["TT\_bits", "cdk\_maccs", "Pattern", "FP2", "MFP1", "klekota\_roth",  
"pubchem", "graph", "AP\_bits", "FeatMFP1", "RDKit7", "hybridization"]

14 rank

Platelet-derived growth factor receptor beta : Homo sapiens

score: 8.899 on ChEMBL1913 based on 12 fingerprints

| Fingerprint type | Ligand       | Tanimoto | Similarity | activity | Valid fg |
|------------------|--------------|----------|------------|----------|----------|
| FeatMFP1         | CHEMBL593274 |          | 0.742857   | 3600.0   | *        |

|               |               |          |        |   |
|---------------|---------------|----------|--------|---|
| MFP1          | CHEMBL593274  | 0.588235 | 3600.0 | * |
| RDKit7        | CHEMBL301018  | 0.750727 | 3000.0 | * |
| Pattern       | CHEMBL1630109 | 0.886010 | 2500.0 | * |
| AP_bits       | CHEMBL604893  | 0.609078 | 7700.0 | * |
| TT_bits       | CHEMBL1630109 | 0.587500 | 2500.0 | * |
| FP2           | CHEMBL301018  | 0.710145 | 3000.0 | * |
| hybridization | CHEMBL1630113 | 0.747788 | 3900.0 | * |
| substructure  | CHEMBL593909  | 0.900000 | 9200.0 | * |
| graph         | CHEMBL1630113 | 0.734694 | 3900.0 | * |
| pubchem       | CHEMBL301018  | 0.910714 | 3000.0 | * |
| cdk_maccs     | CHEMBL24828   | 0.845070 | 477.0  | * |
| klekota_roth  | CHEMBL593909  | 0.620690 | 9200.0 | * |

\*\*\* ic50 ACTIVITY \*\*\* value prediction

based on 12 locally validated fgps ---> 4335.226

["TT\_bits", "substructure", "cdk\_maccs", "Pattern", "FP2", "MFP1",  
"klekota\_roth", "pubchem", "AP\_bits", "FeatMFP1", "RDKit7",  
"hybridization"]

15 rank

Serine/threonine-protein kinase Aurora-A : Homo sapiens

score: 8.875 on ChEMBL4722 based on 12 fingerprints

| Fingerprint type | Ligand       | Tanimoto | Similarity | activity | Valid | fg |
|------------------|--------------|----------|------------|----------|-------|----|
| FeatMFP1         | CHEMBL593274 |          | 0.742857   | 27.00    |       | *  |
| MFP1             | CHEMBL593274 |          | 0.588235   | 27.00    |       | *  |
| RDKit7           | CHEMBL301018 |          | 0.750727   | 6500.00  |       | *  |
| Pattern          | CHEMBL382667 |          | 0.880750   | 0.15     |       | *  |
| AP_bits          | CHEMBL604893 |          | 0.609078   | 690.00   |       | *  |
| TT_bits          | CHEMBL217804 |          | 0.609756   | 220.00   |       | *  |
| FP2              | CHEMBL301018 |          | 0.710145   | 6500.00  |       | *  |
| hybridization    | CHEMBL604893 |          | 0.700787   | 690.00   |       | *  |
| substructure     | CHEMBL593909 |          | 0.900000   | 85.00    |       | *  |
| graph            | CHEMBL301018 |          | 0.713514   | 6500.00  |       | *  |
| pubchem          | CHEMBL301018 |          | 0.910714   | 6500.00  |       | *  |
| cdk_maccs        | CHEMBL203945 |          | 0.851351   | 0.80     |       | *  |
| klekota_roth     | CHEMBL593909 |          | 0.620690   | 85.00    |       | *  |

\*\*\* ic50 ACTIVITY \*\*\* value prediction

based on 12 locally validated fgps ---> 4089.889

["TT\_bits", "substructure", "cdk\_maccs", "Pattern", "FP2", "MFP1",  
"klekota\_roth", "pubchem", "AP\_bits", "FeatMFP1", "RDKit7",  
"hybridization"]

16 rank

Serine/threonine-protein kinase Aurora-B : Homo sapiens

score: 8.835 on ChEMBL2185 based on 12 fingerprints

| Fingerprint type | Ligand        | Tanimoto | Similarity | activity | Valid | fg |
|------------------|---------------|----------|------------|----------|-------|----|
| FeatMFP1         | CHEMBL593274  |          | 0.742857   | 78.0     |       | *  |
| MFP1             | CHEMBL593274  |          | 0.588235   | 78.0     |       | *  |
| RDKit7           | CHEMBL301018  |          | 0.750727   | 7400.0   |       | *  |
| Pattern          | CHEMBL3685239 |          | 0.873684   | 6.5      |       | *  |
| AP_bits          | CHEMBL604893  |          | 0.609078   | 4800.0   |       | *  |
| TT_bits          | CHEMBL217804  |          | 0.609756   | 2.0      |       | *  |
| FP2              | CHEMBL301018  |          | 0.710145   | 7400.0   |       | *  |
| hybridization    | CHEMBL604893  |          | 0.700787   | 4800.0   |       | *  |
| substructure     | CHEMBL593909  |          | 0.900000   | 90.0     |       | *  |
| graph            | CHEMBL301018  |          | 0.713514   | 7400.0   |       | *  |
| pubchem          | CHEMBL301018  |          | 0.910714   | 7400.0   |       | *  |
| cdk_maccs        | CHEMBL593909  |          | 0.818182   | 90.0     |       | *  |
| klekota_roth     | CHEMBL593909  |          | 0.620690   | 90.0     |       | *  |

\*\*\* ic50 ACTIVITY \*\*\* value prediction

based on 12 locally validated fgps ---> 1930.037

["TT\_bits", "substructure", "cdk\_maccs", "Pattern", "FP2", "MFP1",  
"klekota\_roth", "pubchem", "AP\_bits", "FeatMFP1", "RDKit7",  
"hybridization"]

17 rank

Vascular endothelial growth factor receptor 3 : Homo sapiens

score: 8.714 on ChEMBL1955 based on 12 fingerprints

| Fingerprint type | Ligand        | Tanimoto Similarity | activity | Valid fg |
|------------------|---------------|---------------------|----------|----------|
| FeatMFP1         | CHEMBL593274  | 0.742857            | 470.0    | *        |
| MFP1             | CHEMBL593274  | 0.588235            | 470.0    | *        |
| RDKit7           | CHEMBL301018  | 0.750727            | 2400.0   | *        |
| Pattern          | CHEMBL1934327 | 0.851590            | 9.6      | *        |
| AP_bits          | CHEMBL593274  | 0.569602            | 470.0    | *        |
| TT_bits          | CHEMBL301018  | 0.541667            | 2400.0   | *        |
| FP2              | CHEMBL301018  | 0.710145            | 2400.0   | *        |
| hybridization    | CHEMBL593274  | 0.682879            | 470.0    | *        |
| substructure     | CHEMBL593909  | 0.900000            | 3000.0   | *        |
| graph            | CHEMBL301018  | 0.713514            | 2400.0   | *        |
| pubchem          | CHEMBL301018  | 0.910714            | 2400.0   | *        |
| cdk_maccs        | CHEMBL24828   | 0.845070            | 233.0    | *        |
| klekota_roth     | CHEMBL593909  | 0.620690            | 3000.0   | *        |

\*\*\* ic50 ACTIVITY \*\*\* value prediction

based on 12 locally validated fgps ---> 1711.813

["TT\_bits", "substructure", "cdk\_maccs", "Pattern", "FP2", "MFP1",  
"klekota\_roth", "pubchem", "AP\_bits", "FeatMFP1", "RDKit7",  
"hybridization"]

18 rank

Tyrosine-protein kinase HCK : Homo sapiens

score: 8.136 on ChEMBL3234 based on 11 fingerprints

| Fingerprint type | Ligand       | Tanimoto Similarity | activity | Valid fg |
|------------------|--------------|---------------------|----------|----------|
| FeatMFP1         | CHEMBL939    | 0.750000            | 110.0    | *        |
| MFP1             | CHEMBL939    | 0.688889            | 110.0    | *        |
| RDKit7           | CHEMBL939    | 0.805133            | 110.0    | *        |
| Pattern          | CHEMBL288441 | 0.823430            | 3.2      | *        |
| AP_bits          | CHEMBL939    | 0.507317            | 110.0    | *        |
| TT_bits          | CHEMBL939    | 0.635135            | 110.0    | *        |
| FP2              | CHEMBL939    | 0.782313            | 110.0    | *        |
| hybridization    | CHEMBL939    | 0.816471            | 110.0    | *        |
| substructure     | CHEMBL288441 | 0.772727            | 3.2      | *        |
| graph            | CHEMBL939    | 0.777778            | 110.0    | *        |
| pubchem          | CHEMBL939    | 0.925764            | 110.0    | *        |
| cdk_maccs        | CHEMBL288441 | 0.847222            | 3.2      | *        |
| klekota_roth     | CHEMBL939    | 0.600000            | 110.0    | *        |

\*\*\* ic50 ACTIVITY \*\*\* value prediction

based on 11 locally validated fgps ---> 180.410

["TT\_bits", "cdk\_maccs", "AP\_bits", "MFP1", "klekota\_roth", "pubchem",  
"graph", "FP2", "FeatMFP1", "RDKit7", "hybridization"]

19 rank

Cruzipain : Trypanosoma cruzi

score: 8.129 on ChEMBL3563 based on 11 fingerprints

| Fingerprint type | Ligand    | Tanimoto Similarity | activity | Valid fg |
|------------------|-----------|---------------------|----------|----------|
| FeatMFP1         | CHEMBL939 | 0.750000            | 88000.0  | *        |
| MFP1             | CHEMBL939 | 0.688889            | 88000.0  | *        |
| RDKit7           | CHEMBL939 | 0.805133            | 88000.0  | *        |
| Pattern          | CHEMBL939 | 0.822785            | 88000.0  | *        |
| AP_bits          | CHEMBL939 | 0.507317            | 88000.0  | *        |
| TT_bits          | CHEMBL939 | 0.635135            | 88000.0  | *        |
| FP2              | CHEMBL939 | 0.782313            | 88000.0  | *        |

```

hybridization CHEMBL939          0.816471  88000.0      *
substructure  CHEMBL939          0.750000  88000.0
graph         CHEMBL939          0.777778  88000.0      *
pubchem       CHEMBL939          0.925764  88000.0      *
cdk_maccs     CHEMBL939          0.840580  88000.0      *
klekota_roth  CHEMBL939          0.600000  88000.0      *
*** ic50 ACTIVITY *** value prediction
based on 11 locally validated fgps ---> 88000.000
["TT_bits", "cdk_maccs", "AP_bits", "MFP1", "klekota_roth", "pubchem",
"graph", "FP2", "FeatMFP1", "RDKit7", "hybridization"]

20 rank
Tyrosine-protein kinase BRK : Homo sapiens
score: 8.129 on CHEMBL4601 based on 11 fingerprints
Fingerprint type      Ligand  Tanimoto Similarity  activity Valid fg
FeatMFP1              CHEMBL939          0.750000    980.0      *
MFP1                  CHEMBL939          0.688889    980.0      *
RDKit7                CHEMBL939          0.805133    980.0      *
Pattern               CHEMBL1983268      0.824959    195.0
AP_bits               CHEMBL939          0.507317    980.0      *
TT_bits               CHEMBL939          0.635135    980.0      *
FP2                   CHEMBL939          0.782313    980.0      *
hybridization         CHEMBL939          0.816471    980.0      *
substructure          CHEMBL939          0.750000    980.0
graph                 CHEMBL939          0.777778    980.0      *
pubchem               CHEMBL939          0.925764    980.0      *
cdk_maccs             CHEMBL939          0.840580    980.0      *
klekota_roth          CHEMBL939          0.600000    980.0      *
*** ic50 ACTIVITY *** value prediction
based on 11 locally validated fgps ---> 945.203
["TT_bits", "cdk_maccs", "AP_bits", "MFP1", "klekota_roth", "pubchem",
"graph", "FP2", "FeatMFP1", "RDKit7", "hybridization"]

21 rank
Beta-secretase 1 : Homo sapiens
score: 8.129 on CHEMBL4822 based on 11 fingerprints
Fingerprint type      Ligand  Tanimoto Similarity  activity Valid fg
FeatMFP1              CHEMBL939          0.750000   20000.0    *
MFP1                  CHEMBL939          0.688889   20000.0    *
RDKit7                CHEMBL939          0.805133   20000.0    *
Pattern               CHEMBL939          0.822785   20000.0
AP_bits               CHEMBL939          0.507317   20000.0    *
TT_bits               CHEMBL939          0.635135   20000.0    *
FP2                   CHEMBL939          0.782313   20000.0    *
hybridization         CHEMBL939          0.816471   20000.0    *
substructure          CHEMBL2047223      0.842105    1700.0
graph                 CHEMBL939          0.777778   20000.0    *
pubchem               CHEMBL939          0.925764   20000.0    *
cdk_maccs             CHEMBL939          0.840580   20000.0    *
klekota_roth          CHEMBL939          0.600000   20000.0    *
*** ic50 ACTIVITY *** value prediction
based on 11 locally validated fgps ---> 19175.609
["TT_bits", "cdk_maccs", "AP_bits", "MFP1", "klekota_roth", "pubchem",
"graph", "FP2", "FeatMFP1", "RDKit7", "hybridization"]

22 rank
Serine/threonine-protein kinase RIPK2 : Homo sapiens
score: 8.129 on CHEMBL5014 based on 11 fingerprints
Fingerprint type      Ligand  Tanimoto Similarity  activity Valid fg
FeatMFP1              CHEMBL939          0.750000     3.8      *

```

|               |           |          |     |   |
|---------------|-----------|----------|-----|---|
| MFP1          | CHEMBL939 | 0.688889 | 3.8 | * |
| RDKit7        | CHEMBL939 | 0.805133 | 3.8 | * |
| Pattern       | CHEMBL939 | 0.822785 | 3.8 |   |
| AP_bits       | CHEMBL939 | 0.507317 | 3.8 | * |
| TT_bits       | CHEMBL939 | 0.635135 | 3.8 | * |
| FP2           | CHEMBL939 | 0.782313 | 3.8 | * |
| hybridization | CHEMBL939 | 0.816471 | 3.8 | * |
| substructure  | CHEMBL939 | 0.750000 | 3.8 |   |
| graph         | CHEMBL939 | 0.777778 | 3.8 | * |
| pubchem       | CHEMBL939 | 0.925764 | 3.8 | * |
| cdk_maccs     | CHEMBL939 | 0.840580 | 3.8 | * |
| klekota_roth  | CHEMBL939 | 0.600000 | 3.8 | * |

\*\*\* ic50 ACTIVITY \*\*\* value prediction

based on 11 locally validated fgps ---> 5.709

["TT\_bits", "cdk\_maccs", "AP\_bits", "MFP1", "klekota\_roth", "pubchem", "graph", "FP2", "FeatMFP1", "RDKit7", "hybridization"]

23 rank

HERG : Homo sapiens

score: 8.005 on ChEMBL240 based on 11 fingerprints

| Fingerprint type | Ligand        | Tanimoto | Similarity | activity | Valid fg |
|------------------|---------------|----------|------------|----------|----------|
| FeatMFP1         | CHEMBL3623278 |          | 0.727273   | 17000.0  | *        |
| MFP1             | CHEMBL3623278 |          | 0.583333   | 17000.0  | *        |
| RDKit7           | CHEMBL193544  |          | 0.703361   | 5000.0   | *        |
| Pattern          | CHEMBL554     |          | 0.855025   | 1000.0   | *        |
| AP_bits          | CHEMBL1645462 |          | 0.519411   | 4000.0   | *        |
| TT_bits          | CHEMBL554     |          | 0.533333   | 1000.0   | *        |
| FP2              | CHEMBL193544  |          | 0.703030   | 5000.0   | *        |
| hybridization    | CHEMBL193544  |          | 0.709812   | 5000.0   | *        |
| substructure     | CHEMBL1916532 |          | 0.947368   | 3000.0   | *        |
| graph            | CHEMBL193544  |          | 0.705314   | 5000.0   |          |
| pubchem          | CHEMBL193544  |          | 0.858333   | 5000.0   | *        |
| cdk_maccs        | CHEMBL1916533 |          | 0.864865   | 4000.0   | *        |
| klekota_roth     | CHEMBL3359238 |          | 0.511905   | 1400.0   |          |

\*\*\* ic50 ACTIVITY \*\*\* value prediction

based on 11 locally validated fgps ---> 6768.192

["TT\_bits", "substructure", "cdk\_maccs", "Pattern", "FP2", "MFP1", "pubchem", "AP\_bits", "FeatMFP1", "RDKit7", "hybridization"]

24 rank

Tyrosine-protein kinase TIE-2 : Homo sapiens

score: 7.922 on ChEMBL4128 based on 11 fingerprints

| Fingerprint type | Ligand       | Tanimoto | Similarity | activity | Valid fg |
|------------------|--------------|----------|------------|----------|----------|
| FeatMFP1         | CHEMBL593274 |          | 0.742857   | 37.0     | *        |
| MFP1             | CHEMBL593274 |          | 0.588235   | 37.0     | *        |
| RDKit7           | CHEMBL301018 |          | 0.750727   | 8300.0   | *        |
| Pattern          | CHEMBL593971 |          | 0.829889   | 4000.0   |          |
| AP_bits          | CHEMBL604893 |          | 0.609078   | 510.0    | *        |
| TT_bits          | CHEMBL301018 |          | 0.541667   | 8300.0   | *        |
| FP2              | CHEMBL301018 |          | 0.710145   | 8300.0   | *        |
| hybridization    | CHEMBL604893 |          | 0.700787   | 510.0    | *        |
| substructure     | CHEMBL593909 |          | 0.900000   | 615.0    | *        |
| graph            | CHEMBL301018 |          | 0.713514   | 8300.0   |          |
| pubchem          | CHEMBL301018 |          | 0.910714   | 8300.0   | *        |
| cdk_maccs        | CHEMBL288441 |          | 0.847222   | 1191.0   | *        |
| klekota_roth     | CHEMBL593909 |          | 0.620690   | 615.0    | *        |

\*\*\* ic50 ACTIVITY \*\*\* value prediction

based on 11 locally validated fgps ---> 2424.601

["TT\_bits", "substructure", "cdk\_maccs", "AP\_bits", "MFP1", "klekota\_roth", "pubchem", "FP2", "FeatMFP1", "RDKit7", "hybridization"]

25 rank

Ephrin type-A receptor 2 : Homo sapiens

score: 7.549 on ChEMBL2068 based on 10 fingerprints

| Fingerprint type | Ligand        | Tanimoto | Similarity | activity | Valid fg |
|------------------|---------------|----------|------------|----------|----------|
| FeatMFP1         | CHEMBL3322983 |          | 0.705882   | 300.0    | *        |
| MFP1             | CHEMBL3322981 |          | 0.541667   | 620.0    | *        |
| RDKit7           | CHEMBL3322973 |          | 0.772433   | 1470.0   | *        |
| Pattern          | CHEMBL3322972 |          | 0.846816   | 1190.0   | *        |
| AP_bits          | CHEMBL1090360 |          | 0.461438   | 370.0    |          |
| TT_bits          | CHEMBL3322978 |          | 0.531646   | 580.0    | *        |
| FP2              | CHEMBL3322983 |          | 0.724359   | 300.0    | *        |
| hybridization    | CHEMBL3322983 |          | 0.760000   | 300.0    | *        |
| substructure     | CHEMBL3544983 |          | 0.900000   | 50.0     | *        |
| graph            | CHEMBL3322973 |          | 0.738693   | 1470.0   |          |
| pubchem          | CHEMBL3322973 |          | 0.908696   | 1470.0   | *        |
| cdk_maccs        | CHEMBL3322987 |          | 0.857143   | 160.0    | *        |
| klekota_roth     | CHEMBL3322987 |          | 0.455556   | 160.0    |          |

\*\*\* ic50 ACTIVITY \*\*\* value prediction

based on 10 locally validated fgps ---> 627.315

["TT\_bits", "substructure", "cdk\_maccs", "Pattern", "MFP1", "pubchem", "FP2", "FeatMFP1", "RDKit7", "hybridization"]

26 rank

Insulin receptor : Homo sapiens

score: 7.203 on ChEMBL1981 based on 10 fingerprints

| Fingerprint type | Ligand        | Tanimoto | Similarity | activity | Valid fg |
|------------------|---------------|----------|------------|----------|----------|
| FeatMFP1         | CHEMBL2063926 |          | 0.685714   | 10000.0  | *        |
| MFP1             | CHEMBL301018  |          | 0.547619   | 2600.0   | *        |
| RDKit7           | CHEMBL301018  |          | 0.750727   | 2600.0   | *        |
| Pattern          | CHEMBL1630109 |          | 0.886010   | 3600.0   | *        |
| AP_bits          | CHEMBL502652  |          | 0.527043   | 100.0    | *        |
| TT_bits          | CHEMBL1630109 |          | 0.587500   | 3600.0   | *        |
| FP2              | CHEMBL301018  |          | 0.710145   | 2600.0   | *        |
| hybridization    | CHEMBL1630113 |          | 0.747788   | 5500.0   | *        |
| substructure     | CHEMBL3823045 |          | 0.850000   | 26.0     | *        |
| graph            | CHEMBL1630113 |          | 0.734694   | 5500.0   |          |
| pubchem          | CHEMBL301018  |          | 0.910714   | 2600.0   | *        |
| cdk_maccs        | CHEMBL3785951 |          | 0.794872   | 93.0     |          |
| klekota_roth     | CHEMBL3263965 |          | 0.526316   | 11805.0  |          |

\*\*\* ic50 ACTIVITY \*\*\* value prediction

based on 9 locally validated fgps ---> 4380.344

["TT\_bits", "Pattern", "FP2", "MFP1", "pubchem", "AP\_bits", "FeatMFP1", "RDKit7", "hybridization"]

27 rank

Tyrosine-protein kinase LCK : Homo sapiens

score: 7.025 on ChEMBL258 based on 10 fingerprints

| Fingerprint type | Ligand       | Tanimoto | Similarity | activity | Valid fg |
|------------------|--------------|----------|------------|----------|----------|
| FeatMFP1         | CHEMBL217092 |          | 0.694444   | 4.0      | *        |
| MFP1             | CHEMBL541586 |          | 0.536585   | 10000.0  | *        |
| RDKit7           | CHEMBL540068 |          | 0.752505   | 5000.0   | *        |
| Pattern          | CHEMBL288441 |          | 0.823430   | 1.3      |          |
| AP_bits          | CHEMBL453737 |          | 0.538462   | 4.0      | *        |
| TT_bits          | CHEMBL541586 |          | 0.571429   | 10000.0  | *        |
| FP2              | CHEMBL540068 |          | 0.669118   | 5000.0   | *        |
| hybridization    | CHEMBL540068 |          | 0.667488   | 5000.0   | *        |
| substructure     | CHEMBL247468 |          | 0.850000   | 9.0      | *        |
| graph            | CHEMBL540068 |          | 0.705556   | 5000.0   |          |
| pubchem          | CHEMBL540068 |          | 0.897321   | 5000.0   | *        |

```

        cdk_maccs  CHEMBL288441          0.847222      1.3      *
    klekota_roth  CHEMBL288441          0.532609      1.3
    *** ic50 ACTIVITY *** value prediction
    based on 9 locally validated fgps ---> 4594.651
["TT_bits", "cdk_maccs", "AP_bits", "MFP1", "pubchem", "FP2", "FeatMFP1",
"RDKit7", "hybridization"]

```

28 rank

Cyclin-dependent kinase 2 : Homo sapiens

score: 6.537 on ChEMBL301 based on 9 fingerprints

| Fingerprint type | Ligand        | Tanimoto | Similarity | activity | Valid | fg |
|------------------|---------------|----------|------------|----------|-------|----|
| FeatMFP1         | CHEMBL217092  |          | 0.694444   | 10000.0  |       | *  |
| MFP1             | CHEMBL554     |          | 0.490909   | 11000.0  |       |    |
| RDKit7           | CHEMBL1630110 |          | 0.694683   | 850.0    |       | *  |
| Pattern          | CHEMBL1630109 |          | 0.886010   | 920.0    |       | *  |
| AP_bits          | CHEMBL201307  |          | 0.572005   | 62000.0  |       | *  |
| TT_bits          | CHEMBL1630109 |          | 0.587500   | 920.0    |       | *  |
| FP2              | CHEMBL1630116 |          | 0.640000   | 1400.0   |       | *  |
| hybridization    | CHEMBL1630113 |          | 0.747788   | 1900.0   |       | *  |
| substructure     | CHEMBL2163984 |          | 0.850000   | 700.0    |       | *  |
| graph            | CHEMBL1630113 |          | 0.734694   | 1900.0   |       |    |
| pubchem          | CHEMBL127907  |          | 0.829694   | 1000.0   |       |    |
| cdk_maccs        | CHEMBL186396  |          | 0.864865   | 812.0    |       | *  |
| klekota_roth     | CHEMBL201307  |          | 0.480769   | 62000.0  |       |    |

```

    *** ic50 ACTIVITY *** value prediction
    based on 8 locally validated fgps ---> 7359.761
["TT_bits", "cdk_maccs", "Pattern", "AP_bits", "FP2", "FeatMFP1",
"RDKit7", "hybridization"]

```

29 rank

Stem cell growth factor receptor : Homo sapiens

score: 6.036 on ChEMBL1936 based on 8 fingerprints

| Fingerprint type | Ligand        | Tanimoto | Similarity | activity | Valid | fg |
|------------------|---------------|----------|------------|----------|-------|----|
| FeatMFP1         | CHEMBL217092  |          | 0.694444   | 200.00   |       | *  |
| MFP1             | CHEMBL3594105 |          | 0.491803   | 38.20    |       |    |
| RDKit7           | CHEMBL24828   |          | 0.708850   | 343.00   |       | *  |
| Pattern          | CHEMBL330863  |          | 0.864177   | 21.00    |       | *  |
| AP_bits          | CHEMBL3764279 |          | 0.555280   | 162.50   |       | *  |
| TT_bits          | CHEMBL3628796 |          | 0.481481   | 3.00     |       |    |
| FP2              | CHEMBL24828   |          | 0.617284   | 343.00   |       |    |
| hybridization    | CHEMBL24828   |          | 0.654348   | 343.00   |       | *  |
| substructure     | CHEMBL1945173 |          | 0.850000   | 1100.00  |       | *  |
| graph            | CHEMBL24828   |          | 0.668293   | 343.00   |       |    |
| pubchem          | CHEMBL102346  |          | 0.862069   | 50.00    |       | *  |
| cdk_maccs        | CHEMBL288441  |          | 0.847222   | 6313.00  |       | *  |
| klekota_roth     | CHEMBL3823520 |          | 0.566667   | 9.36     |       |    |

```

    *** ic50 ACTIVITY *** value prediction
    based on 7 locally validated fgps ---> 1090.081
["cdk_maccs", "Pattern", "pubchem", "AP_bits", "FeatMFP1", "RDKit7",
"hybridization"]

```

30 rank

Tyrosine-protein kinase receptor FLT3 : Homo sapiens

score: 5.851 on ChEMBL1974 based on 8 fingerprints

| Fingerprint type | Ligand        | Tanimoto | Similarity | activity | Valid | fg |
|------------------|---------------|----------|------------|----------|-------|----|
| FeatMFP1         | CHEMBL3545311 |          | 0.615385   | 2.10     |       |    |
| MFP1             | CHEMBL3594105 |          | 0.491803   | 134.00   |       |    |
| RDKit7           | CHEMBL598797  |          | 0.708257   | 1500.00  |       | *  |
| Pattern          | CHEMBL330863  |          | 0.864177   | 128.00   |       | *  |
| AP_bits          | CHEMBL1940111 |          | 0.561080   | 10.00    |       | *  |



| TT_bits       | CHEMBL598797  | 0.551282 | 1500.00 | * |
|---------------|---------------|----------|---------|---|
| FP2           | CHEMBL598797  | 0.580838 | 1500.00 |   |
| hybridization | CHEMBL598797  | 0.639413 | 1500.00 | * |
| substructure  | CHEMBL1915641 | 0.850000 | 61.00   | * |
| graph         | CHEMBL598797  | 0.661458 | 1500.00 |   |
| pubchem       | CHEMBL102346  | 0.862069 | 230.00  | * |
| cdk_maccs     | CHEMBL3355065 | 0.814286 | 50.00   | * |
| klekota_roth  | CHEMBL3823520 | 0.566667 | 8.91    |   |

\*\*\* ic50 ACTIVITY \*\*\* value prediction  
based on 7 locally validated fgps ---> 638.262  
["TT\_bits", "cdk\_maccs", "Pattern", "pubchem", "AP\_bits", "RDKit7",  
"hybridization"]

31 rank

MAP kinase p38 alpha : Homo sapiens

score: 5.775 on ChEMBL260 based on 8 fingerprints

| Fingerprint type | Ligand        | Tanimoto | Similarity | activity | Valid fg |
|------------------|---------------|----------|------------|----------|----------|
| FeatMFP1         | CHEMBL7917    | 0.612903 | 560.0      |          |          |
| MFP1             | CHEMBL7917    | 0.500000 | 560.0      |          |          |
| RDKit7           | CHEMBL7917    | 0.752505 | 560.0      |          | *        |
| Pattern          | CHEMBL188114  | 0.860269 | 30.0       |          | *        |
| AP_bits          | CHEMBL188167  | 0.529183 | 50.0       |          | *        |
| TT_bits          | CHEMBL7917    | 0.549296 | 560.0      |          | *        |
| FP2              | CHEMBL7917    | 0.669118 | 560.0      |          | *        |
| hybridization    | CHEMBL7917    | 0.667488 | 560.0      |          | *        |
| substructure     | CHEMBL95692   | 0.850000 | 19.0       |          | *        |
| graph            | CHEMBL7917    | 0.705556 | 560.0      |          |          |
| pubchem          | CHEMBL7917    | 0.897321 | 560.0      |          | *        |
| cdk_maccs        | CHEMBL1946341 | 0.767123 | 2800.0     |          |          |
| klekota_roth     | CHEMBL215289  | 0.456311 | 1300.0     |          |          |

\*\*\* ic50 ACTIVITY \*\*\* value prediction  
based on 7 locally validated fgps ---> 489.892  
["TT\_bits", "Pattern", "AP\_bits", "pubchem", "FP2", "RDKit7",  
"hybridization"]

32 rank

Histone deacetylase 1 : Homo sapiens

score: 5.762 on ChEMBL325 based on 8 fingerprints

| Fingerprint type | Ligand        | Tanimoto | Similarity | activity | Valid fg |
|------------------|---------------|----------|------------|----------|----------|
| FeatMFP1         | CHEMBL3700343 | 0.657895 | 330.0      |          |          |
| MFP1             | CHEMBL3700343 | 0.537037 | 330.0      |          | *        |
| RDKit7           | CHEMBL3633769 | 0.725184 | 3.5        |          | *        |
| Pattern          | CHEMBL1630109 | 0.886010 | 35.0       |          | *        |
| AP_bits          | CHEMBL3700343 | 0.626844 | 330.0      |          | *        |
| TT_bits          | CHEMBL1630109 | 0.587500 | 35.0       |          | *        |
| FP2              | CHEMBL1630110 | 0.619318 | 650.0      |          |          |
| hybridization    | CHEMBL1630107 | 0.742152 | 610.0      |          | *        |
| substructure     | CHEMBL216300  | 0.695652 | 9.0        |          |          |
| graph            | CHEMBL1630107 | 0.720812 | 610.0      |          |          |
| pubchem          | CHEMBL3633769 | 0.832653 | 3.5        |          | *        |
| cdk_maccs        | CHEMBL3700343 | 0.824324 | 330.0      |          | *        |
| klekota_roth     | CHEMBL3700343 | 0.494737 | 330.0      |          |          |

\*\*\* ic50 ACTIVITY \*\*\* value prediction  
based on 8 locally validated fgps ---> 274.996  
["TT\_bits", "cdk\_maccs", "Pattern", "MFP1", "pubchem", "AP\_bits",  
"RDKit7", "hybridization"]

33 rank

Macrophage colony stimulating factor receptor : Homo sapiens

score: 5.726 on ChEMBL1844 based on 8 fingerprints

| Fingerprint type | Ligand        | Tanimoto | Similarity | activity | Valid | fg |
|------------------|---------------|----------|------------|----------|-------|----|
| FeatMFP1         | CHEMBL24828   |          | 0.676471   | 1600.0   |       |    |
| MFP1             | CHEMBL481231  |          | 0.527273   | 7.0      |       | *  |
| RDKit7           | CHEMBL24828   |          | 0.708850   | 1600.0   |       | *  |
| Pattern          | CHEMBL125898  |          | 0.862779   | 1400.0   |       | *  |
| AP_bits          | CHEMBL1940111 |          | 0.561080   | 400.0    |       | *  |
| TT_bits          | CHEMBL1940267 |          | 0.487500   | 300.0    |       |    |
| FP2              | CHEMBL553908  |          | 0.669118   | 1500.0   |       | *  |
| hybridization    | CHEMBL553908  |          | 0.667488   | 1500.0   |       | *  |
| substructure     | CHEMBL24828   |          | 0.809524   | 1600.0   |       |    |
| graph            | CHEMBL553908  |          | 0.705556   | 1500.0   |       |    |
| pubchem          | CHEMBL553908  |          | 0.883929   | 1500.0   |       | *  |
| cdk_maccs        | CHEMBL24828   |          | 0.845070   | 1600.0   |       | *  |
| klekota_roth     | CHEMBL481231  |          | 0.580645   | 7.0      |       |    |

\*\*\* ic50 ACTIVITY \*\*\* value prediction  
 based on 8 locally validated fgps ---> 1230.512  
 ["cdk\_maccs", "Pattern", "AP\_bits", "MFP1", "pubchem", "FP2", "RDKit7",  
 "hybridization"]

34 rank

C-C chemokine receptor type 4 : Homo sapiens

score: 5.426 on ChEMBL2414 based on 7 fingerprints

| Fingerprint type | Ligand       | Tanimoto | Similarity | activity | Valid | fg |
|------------------|--------------|----------|------------|----------|-------|----|
| FeatMFP1         | CHEMBL488691 |          | 0.757576   | 150.0    |       | *  |
| MFP1             | CHEMBL488691 |          | 0.480000   | 150.0    |       |    |
| RDKit7           | CHEMBL488690 |          | 0.688946   | 92.0     |       | *  |
| Pattern          | CHEMBL488855 |          | 0.881416   | 130.0    |       | *  |
| AP_bits          | CHEMBL488855 |          | 0.496372   | 130.0    |       | *  |
| TT_bits          | CHEMBL488704 |          | 0.395833   | 220.0    |       |    |
| FP2              | CHEMBL488690 |          | 0.604938   | 92.0     |       |    |
| hybridization    | CHEMBL488690 |          | 0.579798   | 92.0     |       |    |
| substructure     | CHEMBL365155 |          | 0.894737   | 2000.0   |       | *  |
| graph            | CHEMBL495736 |          | 0.648649   | 87.0     |       |    |
| pubchem          | CHEMBL487665 |          | 0.882609   | 550.0    |       | *  |
| cdk_maccs        | CHEMBL496151 |          | 0.824324   | 48.0     |       | *  |
| klekota_roth     | CHEMBL488691 |          | 0.500000   | 150.0    |       |    |

\*\*\* ic50 ACTIVITY \*\*\* value prediction  
 based on 7 locally validated fgps ---> 300.844  
 ["substructure", "Pattern", "pubchem", "AP\_bits", "FeatMFP1", "RDKit7",  
 "cdk\_maccs"]

35 rank

Ephrin type-B receptor 2 : Homo sapiens

score: 4.791 on ChEMBL3290 based on 7 fingerprints

| Fingerprint type | Ligand       | Tanimoto | Similarity | activity | Valid | fg |
|------------------|--------------|----------|------------|----------|-------|----|
| FeatMFP1         | CHEMBL288441 |          | 0.694444   | 8.5      |       | *  |
| MFP1             | CHEMBL150315 |          | 0.477273   | 8500.0   |       |    |
| RDKit7           | CHEMBL150315 |          | 0.712135   | 8500.0   |       | *  |
| Pattern          | CHEMBL288441 |          | 0.823430   | 8.5      |       |    |
| AP_bits          | CHEMBL288441 |          | 0.474648   | 8.5      |       | *  |
| TT_bits          | CHEMBL127907 |          | 0.527778   | 1200.0   |       | *  |
| FP2              | CHEMBL150315 |          | 0.641379   | 8500.0   |       | *  |
| hybridization    | CHEMBL150315 |          | 0.611241   | 8500.0   |       |    |
| substructure     | CHEMBL288441 |          | 0.772727   | 8.5      |       |    |
| graph            | CHEMBL97771  |          | 0.666667   | 86000.0  |       |    |
| pubchem          | CHEMBL150315 |          | 0.893805   | 8500.0   |       | *  |
| cdk_maccs        | CHEMBL288441 |          | 0.847222   | 8.5      |       | *  |
| klekota_roth     | CHEMBL288441 |          | 0.532609   | 8.5      |       |    |

\*\*\* ic50 ACTIVITY \*\*\* value prediction  
 based on 7 locally validated fgps ---> 9424.287

["TT\_bits", "AP\_bits", "pubchem", "FP2", "FeatMFP1", "RDKit7",  
"cdk\_maccs"]

36 rank

Tyrosine-protein kinase CSK : Homo sapiens

score: 4.774 on ChEMBL2634 based on 7 fingerprints

| Fingerprint type | Ligand        | Tanimoto | Similarity | activity | Valid fg |
|------------------|---------------|----------|------------|----------|----------|
| FeatMFP1         | CHEMBL369360  |          | 0.727273   | 7300.0   | *        |
| MFP1             | CHEMBL369360  |          | 0.571429   | 7300.0   | *        |
| RDKit7           | CHEMBL169186  |          | 0.696327   | 1700.0   | *        |
| Pattern          | CHEMBL201307  |          | 0.839607   | 21000.0  |          |
| AP_bits          | CHEMBL201307  |          | 0.572005   | 21000.0  | *        |
| TT_bits          | CHEMBL201307  |          | 0.521739   | 21000.0  | *        |
| FP2              | CHEMBL369360  |          | 0.588889   | 7300.0   |          |
| hybridization    | CHEMBL369360  |          | 0.626894   | 7300.0   |          |
| substructure     | CHEMBL169186  |          | 0.809524   | 1700.0   |          |
| graph            | CHEMBL1614725 |          | 0.668224   | 4700.0   |          |
| pubchem          | CHEMBL169186  |          | 0.838057   | 1700.0   | *        |
| cdk_maccs        | CHEMBL288441  |          | 0.847222   | 63.0     | *        |
| klekota_roth     | CHEMBL169186  |          | 0.558140   | 1700.0   |          |

\*\*\* ic50 ACTIVITY \*\*\* value prediction

based on 7 locally validated fgps ---> 7459.712

["TT\_bits", "AP\_bits", "MFP1", "pubchem", "FeatMFP1", "RDKit7",  
"cdk\_maccs"]

# SwissTargetPrediction report:

## Reference:

Gfeller D., Michielin O. & Zoete V.  
Shaping the interaction landscape of  
bioactive molecules, *Bioinformatics*  
(2013) 29:3073-3079.

## Query Molecule

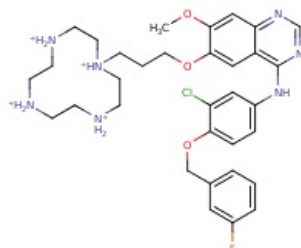

## Frequency of Target Class

| Target                                                               | Uniprot ID | Gene code | ChEMBL ID  | Probability            | # sim. cmpds (3D / 2D) | Target Class   |
|----------------------------------------------------------------------|------------|-----------|------------|------------------------|------------------------|----------------|
| Epidermal growth factor receptor                                     | P00533     | EGFR      | CHEMBL203  | <div><div></div></div> | 27 / 755               | Tyr Kinase     |
| Receptor tyrosine-protein kinase erbB-2                              | P04626     | ERBB2     | CHEMBL1824 | <div><div></div></div> | 27 / 755               | Tyr Kinase     |
| Receptor tyrosine-protein kinase erbB-3 ( <i>by homology</i> )       | P21860     | ERBB3     | CHEMBL5838 | <div><div></div></div> | 27 / 755               | Tyr Kinase     |
| ERBB4 intracellular domain ( <i>by homology</i> )                    | Q15303     | ERBB4     | CHEMBL3009 | <div><div></div></div> | 27 / 755               | Tyr Kinase     |
| Vascular endothelial growth factor receptor 1                        | P17948     | FLT1      | CHEMBL1868 | <div><div></div></div> | 24 / 216               | Tyr Kinase     |
| Vascular endothelial growth factor receptor 3 ( <i>by homology</i> ) | P35916     | FLT4      | CHEMBL1955 | <div><div></div></div> | 24 / 216               | Tyr Kinase     |
| Vascular endothelial growth factor receptor 2                        | P35968     | KDR       | CHEMBL279  | <div><div></div></div> | 24 / 216               | Tyr Kinase     |
| Serine/threonine-protein kinase Chk2                                 | O96017     | CHEK2     | CHEMBL2527 | <div><div></div></div> | 5 / 17                 | Ser_Thr Kinase |
| Tyrosine-protein kinase ABL1                                         | P00519     | ABL1      | CHEMBL1862 | <div><div></div></div> | 3 / 27                 | Tyr Kinase     |
| Hepatocyte growth factor receptor                                    | P08581     | MET       | CHEMBL3717 | <div><div></div></div> | 5 / 14                 | Tyr Kinase     |
| Abelson tyrosine-protein kinase 2                                    | P42684     | ABL2      | CHEMBL4014 | <div><div></div></div> | 3 / 27                 | Tyr Kinase     |
| Mitogen-activated protein kinase 8 ( <i>by homology</i> )            | P45983     | MAPK8     | CHEMBL2276 | <div><div></div></div> | 6 / 27                 | Ser_Thr Kinase |
| Mitogen-activated protein kinase 9                                   | P45984     | MAPK9     | CHEMBL4179 | <div><div></div></div> | 6 / 27                 | Ser_Thr Kinase |
| Mitogen-activated protein kinase 10                                  | P53779     | MAPK10    | CHEMBL2637 | <div><div></div></div> | 6 / 27                 | Ser_Thr Kinase |
| Mitogen-activated protein kinase 14                                  | Q16539     | MAPK14    | CHEMBL260  | <div><div></div></div> | 6 / 27                 | Ser_Thr Kinase |

# Polypharmacology Browser 2 Prediction:

Targets predicted using NN(ECfp4) + NB(ECfp4).

Save Table

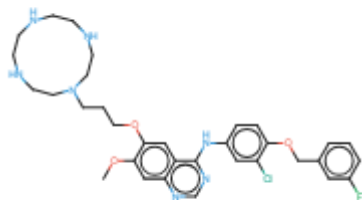

Query molecule

Target class overview

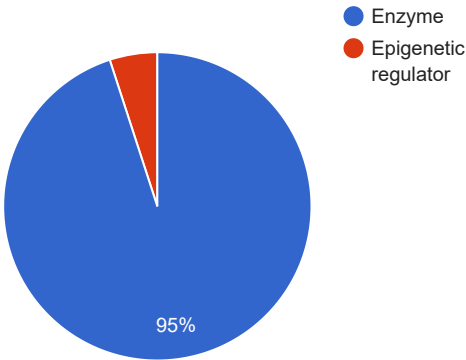

| Rank | ChEMBL ID                                                                                                                                  | Common name                                   | Nearest neighbours |
|------|--------------------------------------------------------------------------------------------------------------------------------------------|-----------------------------------------------|--------------------|
| 1    | CHEMBL203 ( <a href="https://www.ebi.ac.uk/chembl/target/inspect/CHEMBL203">https://www.ebi.ac.uk/chembl/target/inspect/CHEMBL203</a> )    | Epidermal growth factor receptor erbB1        | Show NN            |
| 2    | CHEMBL1824 ( <a href="https://www.ebi.ac.uk/chembl/target/inspect/CHEMBL1824">https://www.ebi.ac.uk/chembl/target/inspect/CHEMBL1824</a> ) | Receptor protein-tyrosine kinase erbB-2       | Show NN            |
| 3    | CHEMBL1862 ( <a href="https://www.ebi.ac.uk/chembl/target/inspect/CHEMBL1862">https://www.ebi.ac.uk/chembl/target/inspect/CHEMBL1862</a> ) | Tyrosine-protein kinase ABL                   | Show NN            |
| 4    | CHEMBL1981 ( <a href="https://www.ebi.ac.uk/chembl/target/inspect/CHEMBL1981">https://www.ebi.ac.uk/chembl/target/inspect/CHEMBL1981</a> ) | Insulin receptor                              | Show NN            |
| 5    | CHEMBL1913 ( <a href="https://www.ebi.ac.uk/chembl/target/inspect/CHEMBL1913">https://www.ebi.ac.uk/chembl/target/inspect/CHEMBL1913</a> ) | Platelet-derived growth factor receptor beta  | Show NN            |
| 6    | CHEMBL279 ( <a href="https://www.ebi.ac.uk/chembl/target/inspect/CHEMBL279">https://www.ebi.ac.uk/chembl/target/inspect/CHEMBL279</a> )    | Vascular endothelial growth factor receptor 2 | Show NN            |
| 7    | CHEMBL267 ( <a href="https://www.ebi.ac.uk/chembl/target/inspect/CHEMBL267">https://www.ebi.ac.uk/chembl/target/inspect/CHEMBL267</a> )    | Tyrosine-protein kinase SRC                   | Show NN            |
| 8    | CHEMBL258 ( <a href="https://www.ebi.ac.uk/chembl/target/inspect/CHEMBL258">https://www.ebi.ac.uk/chembl/target/inspect/CHEMBL258</a> )    | Tyrosine-protein kinase LCK                   | Show NN            |
| 9    | CHEMBL1868 ( <a href="https://www.ebi.ac.uk/chembl/target/inspect/CHEMBL1868">https://www.ebi.ac.uk/chembl/target/inspect/CHEMBL1868</a> ) | Vascular endothelial growth factor receptor 1 | Show NN            |
| 10   | CHEMBL3009 ( <a href="https://www.ebi.ac.uk/chembl/target/inspect/CHEMBL3009">https://www.ebi.ac.uk/chembl/target/inspect/CHEMBL3009</a> ) | Receptor protein-tyrosine kinase erbB-4       | Show NN            |
| 11   | CHEMBL1974 ( <a href="https://www.ebi.ac.uk/chembl/target/inspect/CHEMBL1974">https://www.ebi.ac.uk/chembl/target/inspect/CHEMBL1974</a> ) | Tyrosine-protein kinase receptor FLT3         | Show NN            |
| 12   | CHEMBL2185 ( <a href="https://www.ebi.ac.uk/chembl/target/inspect/CHEMBL2185">https://www.ebi.ac.uk/chembl/target/inspect/CHEMBL2185</a> ) | Serine/threonine-protein kinase Aurora-B      | Show NN            |
| 13   | CHEMBL1955 ( <a href="https://www.ebi.ac.uk/chembl/target/inspect/CHEMBL1955">https://www.ebi.ac.uk/chembl/target/inspect/CHEMBL1955</a> ) | Vascular endothelial growth factor receptor 3 | Show NN            |
| 14   | CHEMBL1844 ( <a href="https://www.ebi.ac.uk/chembl/target/inspect/CHEMBL1844">https://www.ebi.ac.uk/chembl/target/inspect/CHEMBL1844</a> ) | Macrophage colony stimulating factor receptor | Show NN            |
| 15   | CHEMBL3650 ( <a href="https://www.ebi.ac.uk/chembl/target/inspect/CHEMBL3650">https://www.ebi.ac.uk/chembl/target/inspect/CHEMBL3650</a> ) | Fibroblast growth factor receptor 1           | Show NN            |
| 16   | CHEMBL1936 ( <a href="https://www.ebi.ac.uk/chembl/target/inspect/CHEMBL1936">https://www.ebi.ac.uk/chembl/target/inspect/CHEMBL1936</a> ) | Stem cell growth factor receptor              | Show NN            |
| 17   | CHEMBL3024 ( <a href="https://www.ebi.ac.uk/chembl/target/inspect/CHEMBL3024">https://www.ebi.ac.uk/chembl/target/inspect/CHEMBL3024</a> ) | Serine/threonine-protein kinase PLK1          | Show NN            |
| 18   | CHEMBL2041 ( <a href="https://www.ebi.ac.uk/chembl/target/inspect/CHEMBL2041">https://www.ebi.ac.uk/chembl/target/inspect/CHEMBL2041</a> ) | Tyrosine-protein kinase receptor RET          | Show NN            |

|    |                                                                                                                                            |                                               |         |
|----|--------------------------------------------------------------------------------------------------------------------------------------------|-----------------------------------------------|---------|
| 19 | CHEMBL325 ( <a href="https://www.ebi.ac.uk/chembl/target/inspect/CHEMBL325">https://www.ebi.ac.uk/chembl/target/inspect/CHEMBL325</a> )    | Histone deacetylase 1                         | Show NN |
| 20 | CHEMBL2007 ( <a href="https://www.ebi.ac.uk/chembl/target/inspect/CHEMBL2007">https://www.ebi.ac.uk/chembl/target/inspect/CHEMBL2007</a> ) | Platelet-derived growth factor receptor alpha | Show NN |
