# Supplementary material for: Accelerating Drug Discovery by Early Protein Drug Target Prediction Based on a Multi-Fingerprint Similarity Search
Source: MDPI journal article supplement (doi:10.3390/molecules24122233), 2019-06-14
Supplement: s1 [file s1]

## MuSSEL Prediction IC<sub>50</sub>:

1 rank

Proteasome Macropain subunit MB1 : Homo sapiens

score: 8.696 on ChEMBL4662 based on 11 fingerprints

| Fingerprint type | Ligand        | Tanimoto Similarity | activity | Valid fg |
|------------------|---------------|---------------------|----------|----------|
| FeatMFP1         | CHEMBL3218825 | 0.761905            | 22.0     | *        |
| MFP1             | CHEMBL3218825 | 0.757576            | 22.0     | *        |
| RDKit7           | CHEMBL3218825 | 0.777778            | 22.0     | *        |
| Pattern          | CHEMBL3218821 | 0.944056            | 25.0     | *        |
| AP_bits          | CHEMBL3218825 | 0.651050            | 22.0     | *        |
| TT_bits          | CHEMBL3218825 | 0.676923            | 22.0     | *        |
| FP2              | CHEMBL3218825 | 0.754545            | 22.0     | *        |
| hybridization    | CHEMBL3218825 | 0.677507            | 22.0     | *        |
| substructure     | CHEMBL3218825 | 1.000000            | 22.0     | *        |
| graph            | CHEMBL3218824 | 0.700000            | 5.4      |          |
| pubchem          | CHEMBL3218825 | 0.904000            | 22.0     | *        |
| cdk_maccs        | CHEMBL3218820 | 0.793103            | 50.0     |          |
| klekota_roth     | CHEMBL3218841 | 0.790476            | 23.0     | *        |

\*\*\* ic50 ACTIVITY \*\*\* value prediction

based on 11 locally validated fgps ---> 23.477

["TT\_bits", "substructure", "Pattern", "FP2", "MFP1", "klekota\_roth", "pubchem", "AP\_bits", "FeatMFP1", "RDKit7", "hybridization"]

2 rank

Peptidase 1 : Dermatophagoides pteronyssinus

score: 7.327 on ChEMBL3351204 based on 10 fingerprints

| Fingerprint type | Ligand        | Tanimoto Similarity | activity | Valid fg |
|------------------|---------------|---------------------|----------|----------|
| FeatMFP1         | CHEMBL3679689 | 0.700000            | 7.85     | *        |
| MFP1             | CHEMBL3360281 | 0.647059            | 9.00     | *        |
| RDKit7           | CHEMBL3360284 | 0.682278            | 8.00     | *        |
| Pattern          | CHEMBL3679689 | 0.939815            | 7.85     | *        |
| AP_bits          | CHEMBL3360281 | 0.549834            | 9.00     | *        |
| TT_bits          | CHEMBL3359775 | 0.514706            | 12.00    | *        |
| FP2              | CHEMBL3360284 | 0.810526            | 8.00     | *        |
| hybridization    | CHEMBL3360281 | 0.551913            | 9.00     |          |
| substructure     | CHEMBL3359774 | 0.928571            | 9167.00  | *        |
| graph            | CHEMBL3679690 | 0.678571            | 6.30     |          |
| pubchem          | CHEMBL3360284 | 0.902439            | 8.00     | *        |
| cdk_maccs        | CHEMBL3359775 | 0.696429            | 12.00    |          |
| klekota_roth     | CHEMBL3360281 | 0.652174            | 9.00     | *        |

\*\*\* ic50 ACTIVITY \*\*\* value prediction

based on 10 locally validated fgps ---> 466.790

["TT\_bits", "substructure", "Pattern", "FP2", "MFP1", "klekota\_roth", "pubchem", "AP\_bits", "FeatMFP1", "RDKit7"]

3 rank

Cathepsin B : Homo sapiens

score: 7.228 on ChEMBL4072 based on 10 fingerprints

| Fingerprint type | Ligand        | Tanimoto Similarity | activity | Valid fg |
|------------------|---------------|---------------------|----------|----------|
| FeatMFP1         | CHEMBL3360294 | 0.681818            | 511.0    | *        |
| MFP1             | CHEMBL3360281 | 0.647059            | 512.0    | *        |
| RDKit7           | CHEMBL3360284 | 0.682278            | 242.0    | *        |
| Pattern          | CHEMBL3360281 | 0.914414            | 512.0    | *        |
| AP_bits          | CHEMBL3360281 | 0.549834            | 512.0    | *        |
| TT_bits          | CHEMBL3359775 | 0.514706            | 50.0     | *        |
| FP2              | CHEMBL3360284 | 0.810526            | 242.0    | *        |
| hybridization    | CHEMBL3360281 | 0.551913            | 512.0    |          |
| substructure     | CHEMBL3359776 | 0.866667            | 378.0    | *        |
| graph            | CHEMBL3359780 | 0.676056            | 628.0    |          |
| pubchem          | CHEMBL3360284 | 0.902439            | 242.0    | *        |
| cdk_maccs        | CHEMBL3359775 | 0.696429            | 50.0     |          |

```

klekota_roth  CHEMBL133016          0.658120    59000.0      *
*** ic50 ACTIVITY *** value prediction
based on 10 locally validated fgps ---> 4293.936
["TT_bits", "substructure", "Pattern", "FP2", "MFP1", "klekota_roth",
"pubchem", "AP_bits", "FeatMFP1", "RDKit7"]

```

4 rank

ADAM17 : Homo sapiens

score: 6.864 on ChEMBL3706 based on 9 fingerprints

| Fingerprint type | Ligand       | Tanimoto | Similarity | activity | Valid fg |
|------------------|--------------|----------|------------|----------|----------|
| FeatMFP1         | CHEMBL358770 |          | 0.809524   | 9.00     | *        |
| MFP1             | CHEMBL358770 |          | 0.540541   | 9.00     | *        |
| RDKit7           | CHEMBL358770 |          | 0.621590   | 9.00     |          |
| Pattern          | CHEMBL144001 |          | 0.900452   | 0.57     | *        |
| AP_bits          | CHEMBL144206 |          | 0.566007   | 2.80     | *        |
| TT_bits          | CHEMBL314024 |          | 0.381579   | 2200.00  |          |
| FP2              | CHEMBL358770 |          | 0.747664   | 9.00     | *        |
| hybridization    | CHEMBL358770 |          | 0.517045   | 9.00     |          |
| substructure     | CHEMBL144169 |          | 0.928571   | 3.30     | *        |
| graph            | CHEMBL67311  |          | 0.711864   | 3592.00  |          |
| pubchem          | CHEMBL358770 |          | 0.941176   | 9.00     | *        |
| cdk_maccs        | CHEMBL144001 |          | 0.816667   | 0.57     | *        |
| klekota_roth     | CHEMBL16520  |          | 0.613445   | 20.00    | *        |

```

*** ic50 ACTIVITY *** value prediction
based on 9 locally validated fgps ---> 5.780
["substructure", "Pattern", "AP_bits", "MFP1", "pubchem", "FP2",
"FeatMFP1", "klekota_roth", "cdk_maccs"]

```

5 rank

Matrix metalloproteinase-2 : Homo sapiens

score: 6.668 on ChEMBL333 based on 9 fingerprints

| Fingerprint type | Ligand        | Tanimoto | Similarity | activity | Valid fg |
|------------------|---------------|----------|------------|----------|----------|
| FeatMFP1         | CHEMBL1090647 |          | 0.761905   | 0.70     | *        |
| MFP1             | CHEMBL11306   |          | 0.571429   | 0.70     | *        |
| RDKit7           | CHEMBL347673  |          | 0.527950   | 100.00   |          |
| Pattern          | CHEMBL152531  |          | 0.947368   | 15.00    | *        |
| AP_bits          | CHEMBL492599  |          | 0.569044   | 320.00   | *        |
| TT_bits          | CHEMBL3355723 |          | 0.465753   | 12.50    |          |
| FP2              | CHEMBL347673  |          | 0.635514   | 100.00   | *        |
| hybridization    | CHEMBL3827934 |          | 0.569492   | 100.00   |          |
| substructure     | CHEMBL196647  |          | 0.857143   | 197.00   | *        |
| graph            | CHEMBL3827831 |          | 0.773913   | 0.20     | *        |
| pubchem          | CHEMBL3355723 |          | 0.918033   | 12.50    | *        |
| cdk_maccs        | CHEMBL152267  |          | 0.793103   | 25.70    |          |
| klekota_roth     | CHEMBL153914  |          | 0.634146   | 0.38     | *        |

```

*** ic50 ACTIVITY *** value prediction
based on 9 locally validated fgps ---> 84.434
["substructure", "Pattern", "AP_bits", "MFP1", "pubchem", "graph", "FP2",
"FeatMFP1", "klekota_roth"]

```

6 rank

Matrix metalloproteinase-1 : Homo sapiens

score: 6.140 on ChEMBL332 based on 8 fingerprints

| Fingerprint type | Ligand        | Tanimoto | Similarity | activity | Valid fg |
|------------------|---------------|----------|------------|----------|----------|
| FeatMFP1         | CHEMBL1090647 |          | 0.761905   | 196.0    | *        |
| MFP1             | CHEMBL96654   |          | 0.666667   | 30.0     | *        |
| RDKit7           | CHEMBL133303  |          | 0.529114   | 500.0    |          |
| Pattern          | CHEMBL286698  |          | 0.925059   | 110.0    | *        |
| AP_bits          | CHEMBL162128  |          | 0.573668   | 488.0    | *        |
| TT_bits          | CHEMBL57551   |          | 0.483871   | 147.0    |          |

|               | FP2          | CHEMBL144568 | 0.625954 | 2.2 |   |
|---------------|--------------|--------------|----------|-----|---|
| hybridization | CHEMBL96654  | 0.502732     | 30.0     |     |   |
| substructure  | CHEMBL196647 | 0.857143     | 10000.0  |     | * |
| graph         | CHEMBL315898 | 0.686957     | 26.0     |     |   |
| pubchem       | CHEMBL19623  | 0.883333     | 92.0     |     | * |
| cdk_maccs     | CHEMBL96654  | 0.839286     | 30.0     |     | * |
| klekota_roth  | CHEMBL94155  | 0.633028     | 7000.0   |     | * |

\*\*\* ic50 ACTIVITY \*\*\* value prediction  
based on 8 locally validated fgps ---> 2389.582  
["substructure", "Pattern", "MFP1", "pubchem", "AP\_bits", "FeatMFP1",  
"klekota\_roth", "cdk\_maccs"]

7 rank

Matrix metalloproteinase 3 : Homo sapiens

score: 5.922 on CHEMBL283 based on 8 fingerprints

| Fingerprint type | Ligand        | Tanimoto | Similarity | activity | Valid fg |
|------------------|---------------|----------|------------|----------|----------|
| FeatMFP1         | CHEMBL154040  | 0.761905 | 120.00     |          | *        |
| MFP1             | CHEMBL11306   | 0.571429 | 43.00      |          | *        |
| RDKit7           | CHEMBL133303  | 0.529114 | 10800.00   |          |          |
| Pattern          | CHEMBL152531  | 0.947368 | 21.88      |          | *        |
| AP_bits          | CHEMBL162128  | 0.573668 | 2340.00    |          | *        |
| TT_bits          | CHEMBL133303  | 0.454545 | 10800.00   |          |          |
| FP2              | CHEMBL74670   | 0.692982 | 9.10       |          | *        |
| hybridization    | CHEMBL154040  | 0.535714 | 120.00     |          |          |
| substructure     | CHEMBL3617400 | 0.857143 | 450.00     |          | *        |
| graph            | CHEMBL420259  | 0.690476 | 665.00     |          |          |
| pubchem          | CHEMBL19623   | 0.883333 | 17.00      |          | *        |
| cdk_maccs        | CHEMBL152267  | 0.793103 | 570.00     |          |          |
| klekota_roth     | CHEMBL153914  | 0.634146 | 9.00       |          | *        |

\*\*\* ic50 ACTIVITY \*\*\* value prediction  
based on 8 locally validated fgps ---> 1553.075  
["substructure", "Pattern", "AP\_bits", "MFP1", "pubchem", "FP2",  
"FeatMFP1", "klekota\_roth"]

8 rank

Matrix metalloproteinase 9 : Homo sapiens

score: 5.922 on CHEMBL321 based on 8 fingerprints

| Fingerprint type | Ligand        | Tanimoto | Similarity | activity | Valid fg |
|------------------|---------------|----------|------------|----------|----------|
| FeatMFP1         | CHEMBL1090647 | 0.761905 | 8.60       |          | *        |
| MFP1             | CHEMBL11306   | 0.571429 | 0.38       |          | *        |
| RDKit7           | CHEMBL162128  | 0.519016 | 49.00      |          |          |
| Pattern          | CHEMBL3355723 | 0.933486 | 31.50      |          | *        |
| AP_bits          | CHEMBL162128  | 0.573668 | 49.00      |          | *        |
| TT_bits          | CHEMBL57551   | 0.483871 | 80.00      |          |          |
| FP2              | CHEMBL74670   | 0.692982 | 4.30       |          | *        |
| hybridization    | CHEMBL117225  | 0.494624 | 840.00     |          |          |
| substructure     | CHEMBL196647  | 0.857143 | 983.00     |          | *        |
| graph            | CHEMBL550961  | 0.717742 | 0.60       |          |          |
| pubchem          | CHEMBL3355723 | 0.918033 | 31.50      |          | *        |
| cdk_maccs        | CHEMBL3355722 | 0.779661 | 19.50      |          |          |
| klekota_roth     | CHEMBL16520   | 0.613445 | 12.00      |          | *        |

\*\*\* ic50 ACTIVITY \*\*\* value prediction  
based on 8 locally validated fgps ---> 91.630  
["substructure", "Pattern", "AP\_bits", "MFP1", "pubchem", "FP2",  
"FeatMFP1", "klekota\_roth"]

9 rank

Histone deacetylase 6 : Homo sapiens

score: 5.861 on CHEMBL1865 based on 8 fingerprints

| Fingerprint type | Ligand | Tanimoto | Similarity | activity | Valid fg |
|------------------|--------|----------|------------|----------|----------|
|------------------|--------|----------|------------|----------|----------|

| Fingerprint type | Ligand        | Tanimoto Similarity | activity | Valid fg |
|------------------|---------------|---------------------|----------|----------|
| FeatMFP1         | CHEMBL2431863 | 0.842105            | 79.0     | *        |
| MFP1             | CHEMBL2431863 | 0.580645            | 79.0     | *        |
| RDKit7           | CHEMBL3356933 | 0.551867            | 139.0    |          |
| Pattern          | CHEMBL227170  | 0.871332            | 9.0      | *        |
| AP_bits          | CHEMBL570041  | 0.547546            | 4900.0   | *        |
| TT_bits          | CHEMBL2333341 | 0.509804            | 7.0      | *        |
| FP2              | CHEMBL481718  | 0.678899            | 170.0    | *        |
| hybridization    | CHEMBL3356933 | 0.486486            | 139.0    |          |
| substructure     | CHEMBL3309286 | 0.928571            | 130.0    | *        |
| graph            | CHEMBL3415628 | 0.741667            | 18.0     |          |
| pubchem          | CHEMBL481718  | 0.901639            | 170.0    | *        |
| cdk_maccs        | CHEMBL3693774 | 0.716667            | 7.0      |          |
| klekota_roth     | CHEMBL402363  | 0.554688            | 12000.0  |          |

\*\*\* ic50 ACTIVITY \*\*\* value prediction  
based on 8 locally validated fgps ---> 4825.007  
["TT\_bits", "substructure", "Pattern", "AP\_bits", "MFP1", "pubchem", "FP2", "FeatMFP1"]

10 rank

Cathepsin L : Homo sapiens

score: 5.781 on ChEMBL3837 based on 8 fingerprints

| Fingerprint type | Ligand       | Tanimoto Similarity | activity | Valid fg |
|------------------|--------------|---------------------|----------|----------|
| FeatMFP1         | CHEMBL123571 | 0.727273            | 4300.00  | *        |
| MFP1             | CHEMBL123571 | 0.567568            | 4300.00  | *        |
| RDKit7           | CHEMBL122513 | 0.582960            | 42.00    |          |
| Pattern          | CHEMBL377285 | 0.864745            | 342.00   | *        |
| AP_bits          | CHEMBL258148 | 0.524922            | 34000.00 | *        |
| TT_bits          | CHEMBL550246 | 0.423729            | 251.19   |          |
| FP2              | CHEMBL122513 | 0.572816            | 42.00    |          |
| hybridization    | CHEMBL518284 | 0.463277            | 10.00    |          |
| substructure     | CHEMBL51314  | 0.857143            | 500.00   | *        |
| graph            | CHEMBL123571 | 0.620438            | 4300.00  |          |
| pubchem          | CHEMBL200884 | 0.842975            | 55.00    | *        |
| cdk_maccs        | CHEMBL123571 | 0.803571            | 4300.00  | *        |
| klekota_roth     | CHEMBL125553 | 0.593220            | 23.00    | *        |

\*\*\* ic50 ACTIVITY \*\*\* value prediction  
based on 8 locally validated fgps ---> 3324.267  
["substructure", "Pattern", "MFP1", "pubchem", "AP\_bits", "FeatMFP1", "klekota\_roth", "cdk\_maccs"]

11 rank

Histone deacetylase 8 : Homo sapiens

score: 5.740 on ChEMBL3192 based on 8 fingerprints

| Fingerprint type | Ligand        | Tanimoto Similarity | activity | Valid fg |
|------------------|---------------|---------------------|----------|----------|
| FeatMFP1         | CHEMBL1083439 | 0.750000            | 608.0    | *        |
| MFP1             | CHEMBL2333341 | 0.551724            | 1030.0   | *        |
| RDKit7           | CHEMBL3356933 | 0.551867            | 23.0     |          |
| Pattern          | CHEMBL227170  | 0.871332            | 2060.0   | *        |
| AP_bits          | CHEMBL572044  | 0.547619            | 9700.0   | *        |
| TT_bits          | CHEMBL2333341 | 0.509804            | 1030.0   | *        |
| FP2              | CHEMBL481718  | 0.678899            | 2340.0   | *        |
| hybridization    | CHEMBL3356933 | 0.486486            | 23.0     |          |
| substructure     | CHEMBL3309286 | 0.928571            | 59.0     | *        |
| graph            | CHEMBL3415628 | 0.741667            | 76.0     |          |
| pubchem          | CHEMBL481718  | 0.901639            | 2340.0   | *        |
| cdk_maccs        | CHEMBL589246  | 0.700000            | 12170.0  |          |
| klekota_roth     | CHEMBL402363  | 0.554688            | 3700.0   |          |

\*\*\* ic50 ACTIVITY \*\*\* value prediction  
based on 8 locally validated fgps ---> 1575.219

["TT\_bits", "substructure", "Pattern", "AP\_bits", "MFP1", "pubchem",  
"FP2", "FeatMFP1"]

12 rank

Histone deacetylase 2 : Homo sapiens

score: 5.727 on ChEMBL1937 based on 8 fingerprints

| Fingerprint type | Ligand        | Tanimoto | Similarity | activity | Valid fg |
|------------------|---------------|----------|------------|----------|----------|
| FeatMFP1         | CHEMBL3098687 |          | 0.750000   | 956.0    | *        |
| MFP1             | CHEMBL2333341 |          | 0.551724   | 381.0    | *        |
| RDKit7           | CHEMBL3356933 |          | 0.551867   | 1770.0   |          |
| Pattern          | CHEMBL227170  |          | 0.871332   | 205.0    | *        |
| AP_bits          | CHEMBL2012815 |          | 0.535022   | 290.0    | *        |
| TT_bits          | CHEMBL2333341 |          | 0.509804   | 381.0    | *        |
| FP2              | CHEMBL481718  |          | 0.678899   | 5540.0   | *        |
| hybridization    | CHEMBL3356933 |          | 0.486486   | 1770.0   |          |
| substructure     | CHEMBL3309286 |          | 0.928571   | 100.0    | *        |
| graph            | CHEMBL140525  |          | 0.714286   | 200.0    |          |
| pubchem          | CHEMBL481718  |          | 0.901639   | 5540.0   | *        |
| cdk_maccs        | CHEMBL3309290 |          | 0.687500   | 100.0    |          |
| klekota_roth     | CHEMBL2063396 |          | 0.563492   | 1400.0   |          |

\*\*\* ic50 ACTIVITY \*\*\* value prediction

based on 8 locally validated fgps ---> 1959.524

["TT\_bits", "substructure", "Pattern", "AP\_bits", "MFP1", "pubchem",  
"FP2", "FeatMFP1"]

13 rank

Histone deacetylase 1 : Homo sapiens

score: 5.398 on ChEMBL325 based on 7 fingerprints

| Fingerprint type | Ligand        | Tanimoto | Similarity | activity | Valid fg |
|------------------|---------------|----------|------------|----------|----------|
| FeatMFP1         | CHEMBL246391  |          | 0.842105   | 93.0     | *        |
| MFP1             | CHEMBL246391  |          | 0.656250   | 93.0     | *        |
| RDKit7           | CHEMBL235702  |          | 0.616519   | 560.0    |          |
| Pattern          | CHEMBL227170  |          | 0.871332   | 36.9     | *        |
| AP_bits          | CHEMBL570041  |          | 0.547546   | 200.0    | *        |
| TT_bits          | CHEMBL246391  |          | 0.466667   | 93.0     |          |
| FP2              | CHEMBL246391  |          | 0.637255   | 93.0     | *        |
| hybridization    | CHEMBL246391  |          | 0.557576   | 93.0     |          |
| substructure     | CHEMBL3309286 |          | 0.928571   | 43.0     | *        |
| graph            | CHEMBL3415628 |          | 0.741667   | 6020.0   |          |
| pubchem          | CHEMBL246391  |          | 0.915254   | 93.0     | *        |
| cdk_maccs        | CHEMBL246391  |          | 0.741379   | 93.0     |          |
| klekota_roth     | CHEMBL2063396 |          | 0.563492   | 680.0    |          |

\*\*\* ic50 ACTIVITY \*\*\* value prediction

based on 7 locally validated fgps ---> 8910.543

["substructure", "Pattern", "AP\_bits", "MFP1", "pubchem", "FP2",  
"FeatMFP1"]

14 rank

Immunoglobulin epsilon Fc receptor : Homo sapiens

score: 5.254 on ChEMBL2940 based on 7 fingerprints

| Fingerprint type | Ligand       | Tanimoto | Similarity | activity | Valid fg |
|------------------|--------------|----------|------------|----------|----------|
| FeatMFP1         | CHEMBL96654  |          | 0.761905   | 1900.0   | *        |
| MFP1             | CHEMBL96654  |          | 0.666667   | 1900.0   | *        |
| RDKit7           | CHEMBL420077 |          | 0.465278   | 200.0    |          |
| Pattern          | CHEMBL325608 |          | 0.914352   | 210.0    | *        |
| AP_bits          | CHEMBL112228 |          | 0.556114   | 3700.0   | *        |
| TT_bits          | CHEMBL94155  |          | 0.459016   | 5000.0   |          |
| FP2              | CHEMBL94368  |          | 0.586207   | 1600.0   |          |
| hybridization    | CHEMBL96654  |          | 0.502732   | 1900.0   |          |
| substructure     | CHEMBL11306  |          | 0.714286   | 1000.0   |          |

|              |              |          |        |   |
|--------------|--------------|----------|--------|---|
| graph        | CHEMBL330625 | 0.601449 | 5000.0 |   |
| pubchem      | CHEMBL96654  | 0.882353 | 1900.0 | * |
| cdk_maccs    | CHEMBL96654  | 0.839286 | 1900.0 | * |
| klekota_roth | CHEMBL94155  | 0.633028 | 5000.0 | * |

\*\*\* ic50 ACTIVITY \*\*\* value prediction  
 based on 7 locally validated fgps ---> 3785.606  
 ["Pattern", "MFP1", "pubchem", "AP\_bits", "FeatMFP1", "klekota\_roth",  
 "cdk\_maccs"]

15 rank

Aminopeptidase N : Sus scrofa

score: 5.182 on ChEMBL2590 based on 7 fingerprints

| Fingerprint type | Ligand        | Tanimoto | Similarity | activity | Valid | fg |
|------------------|---------------|----------|------------|----------|-------|----|
| FeatMFP1         | CHEMBL2036146 |          | 0.761905   | 4100.0   |       | *  |
| MFP1             | CHEMBL2036144 |          | 0.666667   | 21000.0  |       | *  |
| RDKit7           | CHEMBL597936  |          | 0.551646   | 6700.0   |       |    |
| Pattern          | CHEMBL597332  |          | 0.855580   | 4300.0   |       | *  |
| AP_bits          | CHEMBL599356  |          | 0.512712   | 33100.0  |       | *  |
| TT_bits          | CHEMBL594961  |          | 0.473684   | 65100.0  |       |    |
| FP2              | CHEMBL575029  |          | 0.601695   | 4300.0   |       |    |
| hybridization    | CHEMBL594961  |          | 0.629508   | 65100.0  |       |    |
| substructure     | CHEMBL593542  |          | 0.800000   | 36000.0  |       |    |
| graph            | CHEMBL594848  |          | 0.651515   | 18500.0  |       |    |
| pubchem          | CHEMBL594961  |          | 0.905983   | 65100.0  |       | *  |
| cdk_maccs        | CHEMBL594961  |          | 0.821429   | 65100.0  |       | *  |
| klekota_roth     | CHEMBL594961  |          | 0.657407   | 65100.0  |       | *  |

\*\*\* ic50 ACTIVITY \*\*\* value prediction  
 based on 7 locally validated fgps ---> 34298.205  
 ["Pattern", "MFP1", "pubchem", "AP\_bits", "FeatMFP1", "klekota\_roth",  
 "cdk\_maccs"]

16 rank

Matrix metalloproteinase 14 : Homo sapiens

score: 5.102 on ChEMBL3869 based on 7 fingerprints

| Fingerprint type | Ligand        | Tanimoto | Similarity | activity | Valid | fg |
|------------------|---------------|----------|------------|----------|-------|----|
| FeatMFP1         | CHEMBL1090647 |          | 0.761905   | 34.0     |       | *  |
| MFP1             | CHEMBL20154   |          | 0.540541   | 1.9      |       | *  |
| RDKit7           | CHEMBL117225  |          | 0.456816   | 1900.0   |       |    |
| Pattern          | CHEMBL117225  |          | 0.876333   | 1900.0   |       | *  |
| AP_bits          | CHEMBL492599  |          | 0.569044   | 1100.0   |       | *  |
| TT_bits          | CHEMBL267603  |          | 0.439024   | 80000.0  |       |    |
| FP2              | CHEMBL19843   |          | 0.575221   | 56.0     |       |    |
| hybridization    | CHEMBL117225  |          | 0.494624   | 1900.0   |       |    |
| substructure     | CHEMBL196647  |          | 0.857143   | 1490.0   |       | *  |
| graph            | CHEMBL1392507 |          | 0.620968   | 26700.0  |       |    |
| pubchem          | CHEMBL19623   |          | 0.883333   | 105.0    |       | *  |
| cdk_maccs        | CHEMBL117225  |          | 0.770492   | 1900.0   |       |    |
| klekota_roth     | CHEMBL16520   |          | 0.613445   | 1.9      |       | *  |

\*\*\* ic50 ACTIVITY \*\*\* value prediction  
 based on 7 locally validated fgps ---> 421.389  
 ["substructure", "Pattern", "MFP1", "pubchem", "AP\_bits", "FeatMFP1",  
 "klekota\_roth"]

17 rank

Matrix metalloproteinase 13 : Homo sapiens

score: 5.008 on ChEMBL280 based on 7 fingerprints

| Fingerprint type | Ligand        | Tanimoto | Similarity | activity | Valid | fg |
|------------------|---------------|----------|------------|----------|-------|----|
| FeatMFP1         | CHEMBL2048512 |          | 0.681818   | 6.40     |       | *  |
| MFP1             | CHEMBL2048512 |          | 0.555556   | 6.40     |       | *  |
| RDKit7           | CHEMBL117225  |          | 0.456816   | 73.00    |       |    |

|               |               |          |          |   |
|---------------|---------------|----------|----------|---|
| Pattern       | CHEMBL516206  | 0.920561 | 0.10     | * |
| AP_bits       | CHEMBL250266  | 0.550960 | 2300.00  | * |
| TT_bits       | CHEMBL1796289 | 0.372881 | 39810.72 |   |
| FP2           | CHEMBL278366  | 0.552632 | 1590.00  |   |
| hybridization | CHEMBL117225  | 0.494624 | 73.00    |   |
| substructure  | CHEMBL3617400 | 0.857143 | 4.60     | * |
| graph         | CHEMBL2048512 | 0.652174 | 6.40     |   |
| pubchem       | CHEMBL117225  | 0.830769 | 73.00    | * |
| cdk_maccs     | CHEMBL117225  | 0.770492 | 73.00    |   |
| klekota_roth  | CHEMBL117225  | 0.611111 | 73.00    | * |

\*\*\* ic50 ACTIVITY \*\*\* value prediction  
 based on 7 locally validated fgps ---> 272.868  
 ["substructure", "Pattern", "MFP1", "pubchem", "AP\_bits", "FeatMFP1",  
 "klekota\_roth"]

18 rank

Neprilysin : Rattus norvegicus

score: 4.979 on ChEMBL3369 based on 7 fingerprints

| Fingerprint type | Ligand       | Tanimoto Similarity | activity | Valid fg |
|------------------|--------------|---------------------|----------|----------|
| FeatMFP1         | CHEMBL16791  | 0.714286            | 600.0    | *        |
| MFP1             | CHEMBL16046  | 0.588235            | 2.0      | *        |
| RDKit7           | CHEMBL314626 | 0.418704            | 1270.0   |          |
| Pattern          | CHEMBL358338 | 0.863341            | 28.0     | *        |
| AP_bits          | CHEMBL23598  | 0.503145            | 800.0    | *        |
| TT_bits          | CHEMBL146594 | 0.435484            | 3.0      |          |
| FP2              | CHEMBL16975  | 0.642202            | 1.2      | *        |
| hybridization    | CHEMBL16975  | 0.500000            | 1.2      |          |
| substructure     | CHEMBL16467  | 0.714286            | 800.0    |          |
| graph            | CHEMBL16467  | 0.666667            | 800.0    |          |
| pubchem          | CHEMBL16568  | 0.842975            | 750.0    | *        |
| cdk_maccs        | CHEMBL16568  | 0.824561            | 750.0    | *        |
| klekota_roth     | CHEMBL16975  | 0.547170            | 1.2      |          |

\*\*\* ic50 ACTIVITY \*\*\* value prediction

based on 7 locally validated fgps ---> 393.619

["Pattern", "AP\_bits", "MFP1", "pubchem", "FP2", "FeatMFP1", "cdk\_maccs"]

## MuSSEL Prediction k<sub>i</sub>:

1 rank

Matrix metalloproteinase 8 : Homo sapiens

score: 5.439 on ChEMBL4588 based on 7 fingerprints

| Fingerprint type | Ligand       | Tanimoto | Similarity | activity | Valid fg |
|------------------|--------------|----------|------------|----------|----------|
| FeatMFP1         | ChEMBL103480 |          | 0.800000   | 380.0    | *        |
| MFP1             | ChEMBL71800  |          | 0.647059   | 3.6      | *        |
| RDKit7           | ChEMBL324522 |          | 0.559840   | 55000.0  |          |
| Pattern          | ChEMBL70406  |          | 0.941176   | 13.0     | *        |
| AP_bits          | ChEMBL70406  |          | 0.548061   | 13.0     | *        |
| TT_bits          | ChEMBL71800  |          | 0.477612   | 3.6      |          |
| FP2              | ChEMBL324522 |          | 0.770000   | 55000.0  | *        |
| hybridization    | ChEMBL324522 |          | 0.555556   | 55000.0  |          |
| substructure     | ChEMBL102373 |          | 0.846154   | 1100.0   |          |
| graph            | ChEMBL324522 |          | 0.722689   | 55000.0  |          |
| pubchem          | ChEMBL430838 |          | 0.890756   | 30.0     | *        |
| cdk_maccs        | ChEMBL117503 |          | 0.842105   | 25000.0  | *        |
| klekota_roth     | ChEMBL334065 |          | 0.657658   | 50000.0  |          |

\*\*\* ki ACTIVITY \*\*\* value prediction

based on 7 locally validated fgps ---> 9645.068

["Pattern", "AP\_bits", "MFP1", "pubchem", "FP2", "FeatMFP1", "cdk\_maccs"]

2 rank

Matrix metalloproteinase-2 : Homo sapiens

score: 3.743 on ChEMBL333 based on 5 fingerprints

| Fingerprint type | Ligand       | Tanimoto | Similarity | activity | Valid fg |
|------------------|--------------|----------|------------|----------|----------|
| FeatMFP1         | ChEMBL415074 |          | 0.761905   | 0.10     | *        |
| MFP1             | ChEMBL72337  |          | 0.628571   | 18.00    | *        |
| RDKit7           | ChEMBL295798 |          | 0.471090   | 91.00    |          |
| Pattern          | ChEMBL70406  |          | 0.941176   | 25.00    | *        |
| AP_bits          | ChEMBL70406  |          | 0.548061   | 25.00    | *        |
| TT_bits          | ChEMBL72337  |          | 0.455882   | 18.00    |          |
| FP2              | ChEMBL77057  |          | 0.573913   | 0.02     |          |
| hybridization    | ChEMBL308228 |          | 0.503958   | 1.90     |          |
| substructure     | ChEMBL74040  |          | 0.733333   | 0.01     |          |
| graph            | ChEMBL77057  |          | 0.682759   | 0.02     |          |
| pubchem          | ChEMBL70406  |          | 0.862903   | 25.00    | *        |
| cdk_maccs        | ChEMBL72337  |          | 0.824561   | 18.00    |          |
| klekota_roth     | ChEMBL72337  |          | 0.572581   | 18.00    |          |

\*\*\* ki ACTIVITY \*\*\* value prediction

based on 5 locally validated fgps ---> 15.267

["FeatMFP1", "Pattern", "MFP1", "pubchem", "AP\_bits"]

3 rank

Matrix metalloproteinase 3 : Homo sapiens

score: 3.130 on ChEMBL283 based on 4 fingerprints

| Fingerprint type | Ligand       | Tanimoto | Similarity | activity | Valid fg |
|------------------|--------------|----------|------------|----------|----------|
| FeatMFP1         | ChEMBL415074 |          | 0.761905   | 5.44     | *        |
| MFP1             | ChEMBL430838 |          | 0.583333   | 91.20    |          |
| RDKit7           | ChEMBL112864 |          | 0.482465   | 120.00   |          |
| Pattern          | ChEMBL269334 |          | 0.926773   | 15.00    | *        |
| AP_bits          | ChEMBL112864 |          | 0.550544   | 120.00   | *        |
| TT_bits          | ChEMBL430838 |          | 0.439394   | 91.20    |          |
| FP2              | ChEMBL77057  |          | 0.573913   | 5.87     |          |
| hybridization    | ChEMBL167232 |          | 0.468672   | 168.00   |          |
| substructure     | ChEMBL313207 |          | 0.733333   | 16.00    |          |
| graph            | ChEMBL77057  |          | 0.682759   | 5.87     |          |
| pubchem          | ChEMBL430838 |          | 0.890756   | 91.20    | *        |
| cdk_maccs        | ChEMBL77754  |          | 0.810345   | 25.30    |          |
| klekota_roth     | ChEMBL16520  |          | 0.613445   | 310.00   |          |

\*\*\* ki ACTIVITY \*\*\* value prediction



based on 4 locally validated fgps ---> 72.839  
["FeatMFP1", "Pattern", "pubchem", "AP\_bits"]

4 rank

Matrix metalloproteinase-1 : Homo sapiens

score: 3.119 on ChEMBL332 based on 4 fingerprints

| Fingerprint type | Ligand       | Tanimoto | Similarity | activity | Valid | fg |
|------------------|--------------|----------|------------|----------|-------|----|
| FeatMFP1         | ChEMBL415074 |          | 0.761905   | 5120.0   |       | *  |
| MFP1             | ChEMBL430838 |          | 0.583333   | 9600.0   |       |    |
| RDKit7           | ChEMBL112864 |          | 0.482465   | 1090.0   |       |    |
| Pattern          | ChEMBL167232 |          | 0.915332   | 282.0    |       | *  |
| AP_bits          | ChEMBL112864 |          | 0.550544   | 1090.0   |       | *  |
| TT_bits          | ChEMBL430838 |          | 0.439394   | 9600.0   |       |    |
| FP2              | ChEMBL77057  |          | 0.573913   | 313.0    |       |    |
| hybridization    | ChEMBL167232 |          | 0.468672   | 282.0    |       |    |
| substructure     | ChEMBL313207 |          | 0.733333   | 350.0    |       |    |
| graph            | ChEMBL77057  |          | 0.682759   | 313.0    |       |    |
| pubchem          | ChEMBL430838 |          | 0.890756   | 9600.0   |       | *  |
| cdk_maccs        | ChEMBL77754  |          | 0.810345   | 7.8      |       |    |
| klekota_roth     | ChEMBL16520  |          | 0.613445   | 2.0      |       |    |

\*\*\* ki ACTIVITY \*\*\* value prediction

based on 4 locally validated fgps ---> 3223.905  
["FeatMFP1", "Pattern", "pubchem", "AP\_bits"]

5 rank

Matrix metalloproteinase 9 : Homo sapiens

score: 3.009 on ChEMBL321 based on 4 fingerprints

| Fingerprint type | Ligand       | Tanimoto | Similarity | activity | Valid | fg |
|------------------|--------------|----------|------------|----------|-------|----|
| FeatMFP1         | ChEMBL71800  |          | 0.727273   | 3.0      |       |    |
| MFP1             | ChEMBL71800  |          | 0.647059   | 3.0      |       | *  |
| RDKit7           | ChEMBL367959 |          | 0.523873   | 5500.0   |       |    |
| Pattern          | ChEMBL70406  |          | 0.941176   | 6.3      |       | *  |
| AP_bits          | ChEMBL70406  |          | 0.548061   | 6.3      |       | *  |
| TT_bits          | ChEMBL71800  |          | 0.477612   | 3.0      |       |    |
| FP2              | ChEMBL367959 |          | 0.609524   | 5500.0   |       |    |
| hybridization    | ChEMBL69024  |          | 0.514905   | 1.5      |       |    |
| substructure     | ChEMBL171466 |          | 0.785714   | 150.0    |       |    |
| graph            | ChEMBL381189 |          | 0.666667   | 6600.0   |       |    |
| pubchem          | ChEMBL369184 |          | 0.872881   | 900.0    |       | *  |
| cdk_maccs        | ChEMBL71800  |          | 0.824561   | 3.0      |       |    |
| klekota_roth     | ChEMBL16520  |          | 0.613445   | 2.0      |       |    |

\*\*\* ki ACTIVITY \*\*\* value prediction

based on 4 locally validated fgps ---> 135.367  
["Pattern", "MFP1", "pubchem", "AP\_bits"]

6 rank

Cathepsin K : Homo sapiens

score: 3.001 on ChEMBL268 based on 4 fingerprints

| Fingerprint type | Ligand        | Tanimoto | Similarity | activity | Valid | fg |
|------------------|---------------|----------|------------|----------|-------|----|
| FeatMFP1         | ChEMBL99288   |          | 0.583333   | 110.0    |       |    |
| MFP1             | ChEMBL371466  |          | 0.529412   | 1500.0   |       |    |
| RDKit7           | ChEMBL96987   |          | 0.606258   | 20.0     |       |    |
| Pattern          | ChEMBL2316590 |          | 0.874172   | 11.5     |       | *  |
| AP_bits          | ChEMBL97402   |          | 0.538188   | 111.0    |       | *  |
| TT_bits          | ChEMBL200235  |          | 0.491525   | 300.0    |       |    |
| FP2              | ChEMBL607169  |          | 0.730769   | 10.1     |       | *  |
| hybridization    | ChEMBL96987   |          | 0.486957   | 20.0     |       |    |
| substructure     | ChEMBL198612  |          | 0.812500   | 246.0    |       |    |
| graph            | ChEMBL3605412 |          | 0.608333   | 114.0    |       |    |
| pubchem          | ChEMBL371466  |          | 0.858333   | 1500.0   |       | *  |

|              |               |          |      |
|--------------|---------------|----------|------|
| cdk_maccs    | CHEMBL100482  | 0.693548 | 30.0 |
| klekota_roth | CHEMBL1651359 | 0.530973 | 2.9  |

\*\*\* ki ACTIVITY \*\*\* value prediction  
based on 4 locally validated fgps ---> 1844.626  
["Pattern", "FP2", "pubchem", "AP\_bits"]

# SwissTargetPrediction report:

## Reference:

Gfeller D., Michielin O. & Zoete V.  
Shaping the interaction landscape of  
bioactive molecules, *Bioinformatics*  
(2013) 29:3073-3079.

## Query Molecule

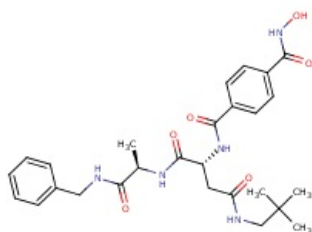

## Frequency of Target Class

| Target                                                         | Uniprot ID             | Gene code              | ChEMBL ID     | Probability            | # sim. cmpds (3D / 2D) | Target Class      |
|----------------------------------------------------------------|------------------------|------------------------|---------------|------------------------|------------------------|-------------------|
| Cathepsin L2 ( <i>by homology</i> )                            | <a href="#">O60911</a> | <a href="#">CTSL2</a>  | CHEMBL3272    | <div><div></div></div> | 77 / 150               | Cysteine Protease |
| Cathepsin L1 light chain                                       | <a href="#">P07711</a> | <a href="#">CTSL1</a>  | CHEMBL3837    | <div><div></div></div> | 77 / 150               | Cysteine Protease |
| Cathepsin S                                                    | <a href="#">P25774</a> | <a href="#">CTSS</a>   | CHEMBL2954    | <div><div></div></div> | 77 / 150               | Cysteine Protease |
| Cathepsin K                                                    | <a href="#">P43235</a> | <a href="#">CTSK</a>   | CHEMBL268     | <div><div></div></div> | 77 / 150               | Cysteine Protease |
| Microtubule-associated protein tau                             | <a href="#">P10636</a> | <a href="#">MAPT</a>   | CHEMBL1293224 | <div><div></div></div> | 200 / 16               | Unclassified      |
| Disintegrin and metalloproteinase domain-containing protein 17 | <a href="#">P78536</a> | <a href="#">ADAM17</a> | CHEMBL3706    | <div><div></div></div> | 236 / 39               | Metallo Protease  |
| 22 kDa interstitial collagenase                                | <a href="#">P03956</a> | <a href="#">MMP1</a>   | CHEMBL332     | <div><div></div></div> | 752 / 277              | Metallo Protease  |
| Stromelysin-1                                                  | <a href="#">P08254</a> | <a href="#">MMP3</a>   | CHEMBL283     | <div><div></div></div> | 752 / 277              | Metallo Protease  |
| Stromelysin-2 ( <i>by homology</i> )                           | <a href="#">P09238</a> | <a href="#">MMP10</a>  | CHEMBL4270    | <div><div></div></div> | 752 / 277              | Metallo Protease  |
| Neutrophil collagenase ( <i>by homology</i> )                  | <a href="#">P22894</a> | <a href="#">MMP8</a>   | CHEMBL4588    | <div><div></div></div> | 684 / 273              | Metallo Protease  |
| Macrophage metalloelastase ( <i>by homology</i> )              | <a href="#">P39900</a> | <a href="#">MMP12</a>  | CHEMBL4393    | <div><div></div></div> | 696 / 241              | Metallo Protease  |
| Collagenase 3 ( <i>by homology</i> )                           | <a href="#">P45452</a> | <a href="#">MMP13</a>  | CHEMBL280     | <div><div></div></div> | 697 / 241              | Metallo Protease  |
| Matrix metalloproteinase-27 ( <i>by homology</i> )             | <a href="#">Q9H306</a> | <a href="#">MMP27</a>  |               | <div><div></div></div> | 752 / 277              | Metallo Protease  |
| Histone deacetylase 1 ( <i>by homology</i> )                   | <a href="#">Q13547</a> | <a href="#">HDAC1</a>  | CHEMBL325     | <div><div></div></div> | 174 / 42               | Enzyme            |
| Histone deacetylase 2                                          | <a href="#">Q92769</a> | <a href="#">HDAC2</a>  | CHEMBL1937    | <div><div></div></div> | 174 / 42               | Enzyme            |

# Polypharmacology Browser 2 Prediction:

Targets predicted using NN(ECfp4) + NB(ECfp4).

Save Table

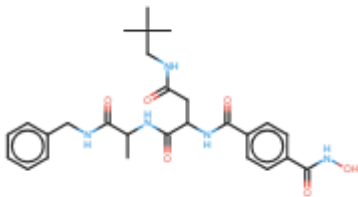

Query molecule

Target class overview

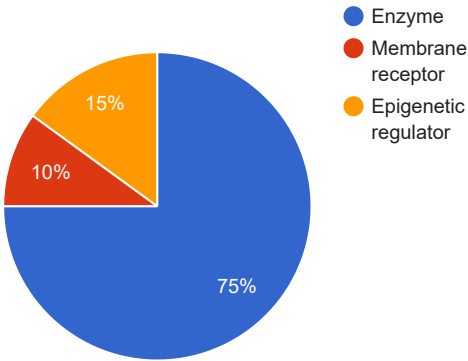

| Rank | ChEMBL ID                                                                                                                                  | Common name                          | Nearest neighbours |
|------|--------------------------------------------------------------------------------------------------------------------------------------------|--------------------------------------|--------------------|
| 1    | CHEMBL4662 ( <a href="https://www.ebi.ac.uk/chembl/target/inspect/CHEMBL4662">https://www.ebi.ac.uk/chembl/target/inspect/CHEMBL4662</a> ) | Proteasome Macropain subunit MB1     | Show NN            |
| 2    | CHEMBL325 ( <a href="https://www.ebi.ac.uk/chembl/target/inspect/CHEMBL325">https://www.ebi.ac.uk/chembl/target/inspect/CHEMBL325</a> )    | Histone deacetylase 1                | Show NN            |
| 3    | CHEMBL4822 ( <a href="https://www.ebi.ac.uk/chembl/target/inspect/CHEMBL4822">https://www.ebi.ac.uk/chembl/target/inspect/CHEMBL4822</a> ) | Beta-secretase 1                     | Show NN            |
| 4    | CHEMBL321 ( <a href="https://www.ebi.ac.uk/chembl/target/inspect/CHEMBL321">https://www.ebi.ac.uk/chembl/target/inspect/CHEMBL321</a> )    | Matrix metalloproteinase 9           | Show NN            |
| 5    | CHEMBL333 ( <a href="https://www.ebi.ac.uk/chembl/target/inspect/CHEMBL333">https://www.ebi.ac.uk/chembl/target/inspect/CHEMBL333</a> )    | Matrix metalloproteinase-2           | Show NN            |
| 6    | CHEMBL4072 ( <a href="https://www.ebi.ac.uk/chembl/target/inspect/CHEMBL4072">https://www.ebi.ac.uk/chembl/target/inspect/CHEMBL4072</a> ) | Cathepsin B                          | Show NN            |
| 7    | CHEMBL332 ( <a href="https://www.ebi.ac.uk/chembl/target/inspect/CHEMBL332">https://www.ebi.ac.uk/chembl/target/inspect/CHEMBL332</a> )    | Matrix metalloproteinase-1           | Show NN            |
| 8    | CHEMBL2954 ( <a href="https://www.ebi.ac.uk/chembl/target/inspect/CHEMBL2954">https://www.ebi.ac.uk/chembl/target/inspect/CHEMBL2954</a> ) | Cathepsin S                          | Show NN            |
| 9    | CHEMBL1865 ( <a href="https://www.ebi.ac.uk/chembl/target/inspect/CHEMBL1865">https://www.ebi.ac.uk/chembl/target/inspect/CHEMBL1865</a> ) | Histone deacetylase 6                | Show NN            |
| 10   | CHEMBL205 ( <a href="https://www.ebi.ac.uk/chembl/target/inspect/CHEMBL205">https://www.ebi.ac.uk/chembl/target/inspect/CHEMBL205</a> )    | Carbonic anhydrase II                | Show NN            |
| 11   | CHEMBL3192 ( <a href="https://www.ebi.ac.uk/chembl/target/inspect/CHEMBL3192">https://www.ebi.ac.uk/chembl/target/inspect/CHEMBL3192</a> ) | Histone deacetylase 8                | Show NN            |
| 12   | CHEMBL4588 ( <a href="https://www.ebi.ac.uk/chembl/target/inspect/CHEMBL4588">https://www.ebi.ac.uk/chembl/target/inspect/CHEMBL4588</a> ) | Matrix metalloproteinase 8           | Show NN            |
| 13   | CHEMBL261 ( <a href="https://www.ebi.ac.uk/chembl/target/inspect/CHEMBL261">https://www.ebi.ac.uk/chembl/target/inspect/CHEMBL261</a> )    | Carbonic anhydrase I                 | Show NN            |
| 14   | CHEMBL233 ( <a href="https://www.ebi.ac.uk/chembl/target/inspect/CHEMBL233">https://www.ebi.ac.uk/chembl/target/inspect/CHEMBL233</a> )    | Mu opioid receptor                   | Show NN            |
| 15   | CHEMBL3837 ( <a href="https://www.ebi.ac.uk/chembl/target/inspect/CHEMBL3837">https://www.ebi.ac.uk/chembl/target/inspect/CHEMBL3837</a> ) | Cathepsin L                          | Show NN            |
| 16   | CHEMBL268 ( <a href="https://www.ebi.ac.uk/chembl/target/inspect/CHEMBL268">https://www.ebi.ac.uk/chembl/target/inspect/CHEMBL268</a> )    | Cathepsin K                          | Show NN            |
| 17   | CHEMBL3286 ( <a href="https://www.ebi.ac.uk/chembl/target/inspect/CHEMBL3286">https://www.ebi.ac.uk/chembl/target/inspect/CHEMBL3286</a> ) | Urokinase-type plasminogen activator | Show NN            |
| 18   | CHEMBL204 ( <a href="https://www.ebi.ac.uk/chembl/target/inspect/CHEMBL204">https://www.ebi.ac.uk/chembl/target/inspect/CHEMBL204</a> )    | Thrombin                             | Show NN            |

|    |                                                                                                                                            |                       |         |
|----|--------------------------------------------------------------------------------------------------------------------------------------------|-----------------------|---------|
| 19 | CHEMBL236 ( <a href="https://www.ebi.ac.uk/chembl/target/inspect/CHEMBL236">https://www.ebi.ac.uk/chembl/target/inspect/CHEMBL236</a> )    | Delta opioid receptor | Show NN |
| 20 | CHEMBL4801 ( <a href="https://www.ebi.ac.uk/chembl/target/inspect/CHEMBL4801">https://www.ebi.ac.uk/chembl/target/inspect/CHEMBL4801</a> ) | Caspase-1             | Show NN |
