# Supplementary material for: Accelerating Drug Discovery by Early Protein Drug Target Prediction Based on a Multi-Fingerprint Similarity Search
Source: MDPI journal article supplement (doi:10.3390/molecules24122233), 2019-06-14
Supplement: s1 [file s1]

## MuSSEL Prediction IC<sub>50</sub>:

1 rank

Tyrosine-protein kinase BTK : Homo sapiens

score: 8.563 on ChEMBL5251 based on 11 fingerprints

| Fingerprint type | Ligand        | Tanimoto | Similarity | activity | Valid fg |
|------------------|---------------|----------|------------|----------|----------|
| FeatMFP1         | ChEMBL3400977 |          | 0.675676   | 65.00    |          |
| MFP1             | ChEMBL3674679 |          | 0.660000   | 16.00    | *        |
| RDKit7           | ChEMBL3400973 |          | 0.743785   | 1568.00  | *        |
| Pattern          | ChEMBL3402578 |          | 0.848787   | 1357.00  | *        |
| AP_bits          | ChEMBL3402576 |          | 0.732558   | 21.30    | *        |
| TT_bits          | ChEMBL3400973 |          | 0.619048   | 1568.00  | *        |
| FP2              | ChEMBL3400973 |          | 0.670157   | 1568.00  | *        |
| hybridization    | ChEMBL3402575 |          | 0.651261   | 38.80    | *        |
| substructure     | ChEMBL3402576 |          | 0.916667   | 21.30    | *        |
| graph            | ChEMBL3400973 |          | 0.754967   | 1568.00  |          |
| pubchem          | ChEMBL3402576 |          | 0.913793   | 21.30    | *        |
| cdk_maccs        | ChEMBL3402576 |          | 0.938462   | 21.30    | *        |
| klekota_roth     | ChEMBL3649459 |          | 0.868852   | 39.35    | *        |

\*\*\* ic50 ACTIVITY \*\*\* value prediction

based on 11 locally validated fgps ---> 308.391

["TT\_bits", "substructure", "cdk\_maccs", "Pattern", "AP\_bits", "MFP1",  
"klekota\_roth", "pubchem", "FP2", "RDKit7", "hybridization"]

# SwissTargetPrediction report:

## Reference:

Gfeller D., Michielin O. & Zoete V.  
Shaping the interaction landscape of  
bioactive molecules, *Bioinformatics*  
(2013) 29:3073-3079.

## Query Molecule

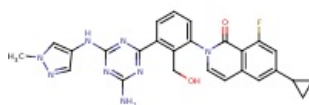

## Frequency of Target Class

| Target                                                      | Uniprot ID | Gene code | ChEMBL ID     | Probability            | # sim. cmpds (3D / 2D) | Target Class      |
|-------------------------------------------------------------|------------|-----------|---------------|------------------------|------------------------|-------------------|
| Tyrosine-protein kinase TXK                                 | P42681     | TXK       | CHEMBL4367    | <div><div></div></div> | 2 / 1                  | Tyr Kinase        |
| Tyrosine-protein kinase BTK                                 | Q06187     | BTK       | CHEMBL5251    | <div><div></div></div> | 2 / 1                  | Tyr Kinase        |
| Tyrosine-protein kinase ITK/TSK                             | Q08881     | ITK       | CHEMBL2959    | <div><div></div></div> | 2 / 1                  | Tyr Kinase        |
| Tyrosine-protein kinase Tec ( <i>by homology</i> )          | P42680     | TEC       | CHEMBL4246    | <div><div></div></div> | 2 / 1                  | Tyr Kinase        |
| 5-hydroxytryptamine receptor 1A                             | P08908     | HTR1A     | CHEMBL214     | <div><div></div></div> | 5 / 1                  | Membrane receptor |
| 5-hydroxytryptamine receptor 1B                             | P28222     | HTR1B     | CHEMBL1898    | <div><div></div></div> | 5 / 1                  | Membrane receptor |
| Microtubule-associated protein tau                          | P10636     | MAPT      | CHEMBL1293224 | <div><div></div></div> | 18 / 1                 | Unclassified      |
| Nitric oxide synthase, endothelial                          | P29474     | NOS3      | CHEMBL4803    | <div><div></div></div> | 1 / 1                  | Enzyme            |
| Nitric oxide synthase, brain                                | P29475     | NOS1      | CHEMBL3568    | <div><div></div></div> | 1 / 1                  | Enzyme            |
| Nitric oxide synthase, inducible                            | P35228     | NOS2      | CHEMBL4481    | <div><div></div></div> | 1 / 1                  | Enzyme            |
| Muscarinic acetylcholine receptor M1                        | P11229     | CHRM1     | CHEMBL216     | <div><div></div></div> | 2 / 5                  | Membrane receptor |
| Muscarinic acetylcholine receptor M2 ( <i>by homology</i> ) | P08172     | CHRM2     | CHEMBL211     | <div><div></div></div> | 2 / 5                  | Membrane receptor |
| Muscarinic acetylcholine receptor M4 ( <i>by homology</i> ) | P08173     | CHRM4     | CHEMBL1821    | <div><div></div></div> | 2 / 5                  | Membrane receptor |
| Muscarinic acetylcholine receptor M3 ( <i>by homology</i> ) | P20309     | CHRM3     | CHEMBL245     | <div><div></div></div> | 1 / 5                  | Membrane receptor |
| D(2) dopamine receptor                                      | P14416     | DRD2      | CHEMBL217     | <div><div></div></div> | 1 / 1                  | Membrane receptor |

# Polypharmacology Browser 2 Prediction:

Targets predicted using NN(ECfp4) + NB(ECfp4).

Save Table

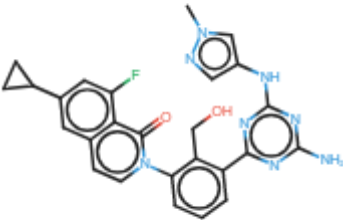

Query molecule

Target class overview

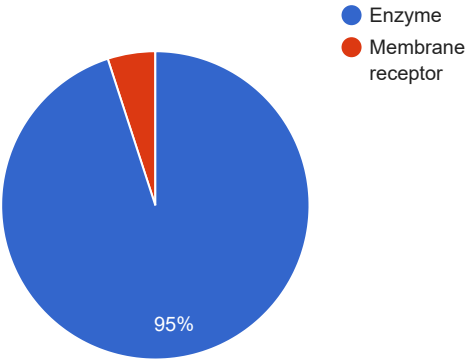

| Rank | ChEMBL ID                                                                                                                                  | Common name                                   | Nearest neighbours |
|------|--------------------------------------------------------------------------------------------------------------------------------------------|-----------------------------------------------|--------------------|
| 1    | CHEMBL5251 ( <a href="https://www.ebi.ac.uk/chembl/target/inspect/CHEMBL5251">https://www.ebi.ac.uk/chembl/target/inspect/CHEMBL5251</a> ) | Tyrosine-protein kinase BTK                   | Show NN            |
| 2    | CHEMBL279 ( <a href="https://www.ebi.ac.uk/chembl/target/inspect/CHEMBL279">https://www.ebi.ac.uk/chembl/target/inspect/CHEMBL279</a> )    | Vascular endothelial growth factor receptor 2 | Show NN            |
| 3    | CHEMBL2971 ( <a href="https://www.ebi.ac.uk/chembl/target/inspect/CHEMBL2971">https://www.ebi.ac.uk/chembl/target/inspect/CHEMBL2971</a> ) | Tyrosine-protein kinase JAK2                  | Show NN            |
| 4    | CHEMBL2842 ( <a href="https://www.ebi.ac.uk/chembl/target/inspect/CHEMBL2842">https://www.ebi.ac.uk/chembl/target/inspect/CHEMBL2842</a> ) | Serine/threonine-protein kinase mTOR          | Show NN            |
| 5    | CHEMBL2599 ( <a href="https://www.ebi.ac.uk/chembl/target/inspect/CHEMBL2599">https://www.ebi.ac.uk/chembl/target/inspect/CHEMBL2599</a> ) | Tyrosine-protein kinase SYK                   | Show NN            |
| 6    | CHEMBL2276 ( <a href="https://www.ebi.ac.uk/chembl/target/inspect/CHEMBL2276">https://www.ebi.ac.uk/chembl/target/inspect/CHEMBL2276</a> ) | c-Jun N-terminal kinase 1                     | Show NN            |
| 7    | CHEMBL4722 ( <a href="https://www.ebi.ac.uk/chembl/target/inspect/CHEMBL4722">https://www.ebi.ac.uk/chembl/target/inspect/CHEMBL4722</a> ) | Serine/threonine-protein kinase Aurora-A      | Show NN            |
| 8    | CHEMBL251 ( <a href="https://www.ebi.ac.uk/chembl/target/inspect/CHEMBL251">https://www.ebi.ac.uk/chembl/target/inspect/CHEMBL251</a> )    | Adenosine A2a receptor                        | Show NN            |
| 9    | CHEMBL1974 ( <a href="https://www.ebi.ac.uk/chembl/target/inspect/CHEMBL1974">https://www.ebi.ac.uk/chembl/target/inspect/CHEMBL1974</a> ) | Tyrosine-protein kinase receptor FLT3         | Show NN            |
| 10   | CHEMBL1936 ( <a href="https://www.ebi.ac.uk/chembl/target/inspect/CHEMBL1936">https://www.ebi.ac.uk/chembl/target/inspect/CHEMBL1936</a> ) | Stem cell growth factor receptor              | Show NN            |
| 11   | CHEMBL258 ( <a href="https://www.ebi.ac.uk/chembl/target/inspect/CHEMBL258">https://www.ebi.ac.uk/chembl/target/inspect/CHEMBL258</a> )    | Tyrosine-protein kinase LCK                   | Show NN            |
| 12   | CHEMBL4247 ( <a href="https://www.ebi.ac.uk/chembl/target/inspect/CHEMBL4247">https://www.ebi.ac.uk/chembl/target/inspect/CHEMBL4247</a> ) | ALK tyrosine kinase receptor                  | Show NN            |
| 13   | CHEMBL2815 ( <a href="https://www.ebi.ac.uk/chembl/target/inspect/CHEMBL2815">https://www.ebi.ac.uk/chembl/target/inspect/CHEMBL2815</a> ) | Nerve growth factor receptor Trk-A            | Show NN            |
| 14   | CHEMBL2185 ( <a href="https://www.ebi.ac.uk/chembl/target/inspect/CHEMBL2185">https://www.ebi.ac.uk/chembl/target/inspect/CHEMBL2185</a> ) | Serine/threonine-protein kinase Aurora-B      | Show NN            |
| 15   | CHEMBL3717 ( <a href="https://www.ebi.ac.uk/chembl/target/inspect/CHEMBL3717">https://www.ebi.ac.uk/chembl/target/inspect/CHEMBL3717</a> ) | Hepatocyte growth factor receptor             | Show NN            |
| 16   | CHEMBL2534 ( <a href="https://www.ebi.ac.uk/chembl/target/inspect/CHEMBL2534">https://www.ebi.ac.uk/chembl/target/inspect/CHEMBL2534</a> ) | 3-phosphoinositide dependent protein kinase-1 | Show NN            |
| 17   | CHEMBL4179 ( <a href="https://www.ebi.ac.uk/chembl/target/inspect/CHEMBL4179">https://www.ebi.ac.uk/chembl/target/inspect/CHEMBL4179</a> ) | c-Jun N-terminal kinase 2                     | Show NN            |
| 18   | CHEMBL2147 ( <a href="https://www.ebi.ac.uk/chembl/target/inspect/CHEMBL2147">https://www.ebi.ac.uk/chembl/target/inspect/CHEMBL2147</a> ) | Serine/threonine-protein kinase PIM1          | Show NN            |

|    |                                                                                                                                            |                              |         |
|----|--------------------------------------------------------------------------------------------------------------------------------------------|------------------------------|---------|
| 19 | CHEMBL2148 ( <a href="https://www.ebi.ac.uk/chembl/target/inspect/CHEMBL2148">https://www.ebi.ac.uk/chembl/target/inspect/CHEMBL2148</a> ) | Tyrosine-protein kinase JAK3 | Show NN |
| 20 | CHEMBL301 ( <a href="https://www.ebi.ac.uk/chembl/target/inspect/CHEMBL301">https://www.ebi.ac.uk/chembl/target/inspect/CHEMBL301</a> )    | Cyclin-dependent kinase 2    | Show NN |
